# Supplementary material
Source: PubMed Central journal article supplement (PMC9375549)
Supplement: NIHMS1826486-supplement-Supporting_Information.pdf [file NIHMS1826486-supplement-Supporting_Information.pdf]

**Enantioselective C–H Amination Catalyzed by Nickel Iminyl Complexes Supported by  
Anionic Bisoxazoline (BOX) Ligands**

**Supporting Information**

Yuyang Dong,<sup>a</sup> Colton J. Lund,<sup>b</sup> Gerard J. Porter,<sup>a</sup> Ryan M. Clarke,<sup>a</sup> Shao-Liang Zheng,<sup>a</sup>  
Thomas R. Cundari<sup>b</sup> and Theodore A. Betley\*<sup>a</sup>

*<sup>a</sup>Department of Chemistry and Chemical Biology, Harvard University, 12 Oxford Street,  
Cambridge, MA 02138*

*<sup>b</sup>Department of Chemistry, Center for Advances Scientific Computing and modelling (CASCaM),  
University of North Texas, Denton, Texas 76203, United States*

|                                                                                |    |
|--------------------------------------------------------------------------------|----|
| <b>General Considerations</b> .....                                            | 4  |
| <b>Characterization and Physical Measurement</b> .....                         | 5  |
| <b>Ligand Syntheses</b> .....                                                  | 6  |
| <b>Transition Metal Complexes Syntheses</b> .....                              | 9  |
| <b>Organoazide Syntheses</b> .....                                             | 13 |
| <b>Characterization of Organoazides</b> .....                                  | 15 |
| <b>Procedure for Catalytic C–H Amination</b> .....                             | 47 |
| <b>Characterization of Substituted Pyrrolidine</b> .....                       | 49 |
| <b>Experimental Details for Mechanistic Studies</b> .....                      | 56 |
| <b>Table S1. Optimization of Amination Conditions</b> .....                    | 58 |
| <b>Figure S1. Plot of initial rate vs. substrate concentrations</b> .....      | 59 |
| <b>Figure S2. Plot of initial rate vs. catalyst loadings</b> .....             | 60 |
| <b>Figure S3. Intermolecular kinetic isotope effect reaction profile</b> ..... | 61 |
| <b>Figure S4. Competition KIE measurement</b> .....                            | 62 |

|                                                                                                                                                                                 |     |
|---------------------------------------------------------------------------------------------------------------------------------------------------------------------------------|-----|
| Figure S5. Frozen solution EPR spectrum of ( <sup>TrH</sup> BOX)Ni(py) (4) .....                                                                                                | 63  |
| Figure S6. Frozen solution EPR spectrum of ( <sup>TrH</sup> BOX)Ni( $\kappa^2$ -N <sub>4</sub> Ad <sub>2</sub> ) (5).....                                                       | 64  |
| Figure S7. Frozen solution EPR spectrum of ( <sup>TrH</sup> BOX)Ni(NAd) (6) .....                                                                                               | 65  |
| Figure S8. <sup>19</sup> F NMR spectra of reaction mixture during catalytic conversion of 7 to 8 up to 30% conversion .....                                                     | 66  |
| Figure S9. Frozen solution EPR spectrum of reaction mixture during catalytic conversion of 7 to 8 at 80% conversion .....                                                       | 67  |
| Figure S10. <sup>1</sup> H and <sup>19</sup> F NMR spectra for reaction of Ad-tetrazido complex 5 <sub>F</sub> and substrate 9 testing for reversible tetrazine formation ..... | 68  |
| Pyrrolidine enantio-enrichment test for C–N bond formation reversibility .....                                                                                                  | 71  |
| Figure S11. Crossover catalytic reaction using 7 and 9 <sub>D2</sub> .....                                                                                                      | 72  |
| Figure S12. Product distribution using enantiopure mono D-labeled substrates S-10 <sub>HD</sub> and R-10 <sub>HD</sub> . .....                                                  | 75  |
| Analysis of intramolecular isotope labelling experiment .....                                                                                                                   | 76  |
| NMR spectra of intermediates in organoazide synthesis .....                                                                                                                     | 81  |
| NMR spectra of organoazides.....                                                                                                                                                | 109 |
| NMR spectra of pyrrolidines .....                                                                                                                                               | 125 |
| NMR spectra for ee determination.....                                                                                                                                           | 147 |
| Chiral GC spectra for ee determination .....                                                                                                                                    | 163 |
| X-ray diffraction techniques .....                                                                                                                                              | 173 |
| Table S2. X-ray diffraction experimental details.....                                                                                                                           | 175 |
| Figure S13. Solid-state molecular structure for ( <sup>TrH</sup> BOX)NiI(py) (3) .....                                                                                          | 177 |
| Figure S14. Solid-state molecular structure for ( <sup>TrH</sup> BOX)Ni(py) (4).....                                                                                            | 178 |
| Figure S15. Solid-state molecular structure for ( <sup>TrH</sup> BOX)Ni( $\kappa^2$ -N <sub>4</sub> Ad <sub>2</sub> ) (5).....                                                  | 179 |
| Figure S16. Solid-state molecular structure for ( <sup>TrH</sup> BOX)Ni(NAd) (6) .....                                                                                          | 180 |
| Computational Methods.....                                                                                                                                                      | 181 |
| Optimized geometry coordinates for ( <sup>TrH</sup> BOX)Ni(NAd) (6).....                                                                                                        | 182 |
| Figure S17 DFT optimized structure for ( <sup>TrH</sup> BOX)Ni(NAd) (6) .....                                                                                                   | 187 |
| Optimized geometry coordinates for ( <sup>AdF</sup> L)Ni(NAd).....                                                                                                              | 188 |
| Figure S18. DFT optimized structure for ( <sup>AdF</sup> L)Ni(NAd).....                                                                                                         | 193 |
| Optimized geometry coordinates for imide ( <sup>TrH</sup> BOX)Ni(NR) .....                                                                                                      | 194 |
| Figure S19. DFT optimized structure for imide ( <sup>AdF</sup> L)Ni(NR).....                                                                                                    | 203 |
| Optimized geometry coordinates for amide ( <sup>TrH</sup> BOX)Ni(NHR) .....                                                                                                     | 204 |

|                                                                                                                          |            |
|--------------------------------------------------------------------------------------------------------------------------|------------|
| <b>Figure S20. DFT optimized structure for amide (<sup>AdF</sup>L)Ni(NHR).....</b>                                       | <b>213</b> |
| <b>Optimized geometry coordinates for product adduct (<sup>TrH</sup>BOX)Ni(pyrrolidine).....</b>                         | <b>214</b> |
| <b>Figure S21. DFT optimized structure for product adduct (<sup>AdF</sup>L)Ni(<i>S</i>-pyrrolidine).....</b>             | <b>223</b> |
| <b>Figure S22. DFT optimized structure for product adduct (<sup>AdF</sup>L)Ni(<i>R</i>-pyrrolidine) .....</b>            | <b>224</b> |
| <b>Optimized geometry coordinates for (<sup>TrH</sup>BOX)Ni(NR) HAA transition state .....</b>                           | <b>225</b> |
| <b>Figure S23. DFT optimized structure for (<sup>AdF</sup>L)Ni(NR) HAA transition state, <i>pro-S</i> hydrogen .....</b> | <b>234</b> |
| <b>Figure S24. DFT optimized structure for (<sup>AdF</sup>L)Ni(NR) HAA transition state, <i>pro-R</i> hydrogen .....</b> | <b>235</b> |
| <b>Optimized geometry coordinates for (<sup>TrH</sup>BOX)Ni(NR) HAA transition state .....</b>                           | <b>236</b> |
| <b>Figure S25. DFT optimized structure for (<sup>AdF</sup>L)Ni(NHR) RR transition state, <i>Re</i> .....</b>             | <b>254</b> |
| <b>Figure S26. DFT optimized structure for (<sup>AdF</sup>L)Ni(NHR) RR transition state, <i>Si</i> .....</b>             | <b>255</b> |
| <b>Figure S27. Transition state structures comparison for radical recombination step (RR) 256</b>                        |            |
| <b>Figure S28. Bond metrics of amide intermediate C and discussion regarding rotational barrier of carboradical.....</b> | <b>257</b> |
| <b>References .....</b>                                                                                                  | <b>259</b> |

## General Considerations

All manipulations of metal complexes were carried out in the absence of water and dioxygen using standard Schlenk techniques, or in an MBraun inert atmosphere drybox under a dinitrogen atmosphere ( $O_2 < 0.1$  ppm,  $H_2O < 0.1$  ppm). All glassware was oven dried overnight and cooled in an evacuated antechamber prior to use in the drybox. Benzene, diethyl ether, THF, and hexanes were dried over 4 Å molecular sieves (Strem) prior to use in the box. Chloroform-*d* was purchased from Cambridge Isotope Labs and used as received. Benzene-*d*<sub>6</sub>, toluene-*d*<sub>8</sub>, DMSO-*d*<sub>6</sub>, methanol-*d*<sub>4</sub> and tetrahydrofuran-*d*<sub>8</sub> were purchased from Cambridge Isotope Labs, degassed, and stored over 4 Å molecular sieves prior to use. Dichloromethane, ethyl acetate and hexanes were purchased from Aldrich and used as received outside the box. Compounds sodium azide, trifluoroacetic acid, trimethylsilyl azide, boron trifluoride diethyl ether adduct, triethyl amine, sodium hydroxide, hydrochloric acid (12 M), methylmagnesium bromide solution (3.0 M in diethyl ether), *n*-butyllithium solution (2.5 M in hexanes), 3,3,3-triphenylpropionic acid, (S)-4-Benzyl-2-oxazolidinone, oxalyl chloride, tosyl azide, perfluorobenzene, potassium hydride, 1-adamantyl azide, potassium, graphite, diethyl malonimidate dihydrochloride, (S)-(+)- $\alpha$ -methoxy- $\alpha$ -(trifluoromethyl)phenylacetyl chloride and 4-ethoxy-4-oxobutylzinc bromide solution (0.5 M) were purchased from Aldrich. Potassium hydride was washed thoroughly with hexanes and stored as a grey powder inside the glovebox. Compounds (<sup>AdFL</sup>Ni(py)), NiI<sub>2</sub>(py)<sub>2</sub> and (4-azido-4-methylpentyl-1,1-d<sub>2</sub>)-4-fluorobenzene (**9D<sub>2</sub>**) were prepared according to published procedures.<sup>1</sup> Celite® 545 (J. T. Baker) was dried in a Schlenk flask for 24 h under dynamic vacuum while heating to at least 150 °C prior to use in a drybox. Silica gel 32-63  $\mu$  (AIC, Framingham, MA) was used as received.

## Characterization and Physical Measurement

$^1\text{H}$ ,  $^{13}\text{C}$  and  $^{19}\text{F}$  NMR were recorded on Varian Unity/Inova 500 MHz- spectrometers. The  $^1\text{H}$  and  $^{13}\text{C}$  NMR chemical shifts are reported relative to  $\text{SiMe}_4$  using the chemical shift of residual solvent peaks as reference. The  $^{19}\text{F}$  NMR chemical shifts are reported relative to an external standard of boron trifluoride diethyl etherate.

Elemental analysis was carried out using PerkinElmer 2400 CHNS/O Series II System.

EPR spectra were obtained on a Bruker EleXsys E-500 CW-EPR spectrometer. Spectra were measured as frozen toluene glasses at a microwave power of 0.6325–2 mW at 77 K. Spectral fitting incorporating spin state, hyperfine splitting and rhombicity were performed using EasySpin.<sup>2</sup>

## Ligand Syntheses

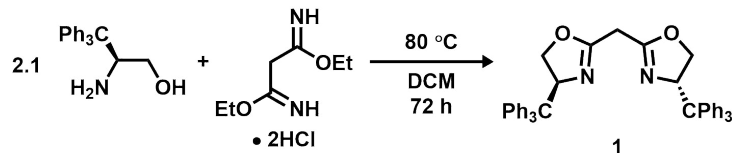

**Bis((S)-4-trityl-4,5-dihydrooxazol-2-yl)methane (1a):** To a 1 L storage flask in a N<sub>2</sub> filled drybox, (S)-2-amino-3,3,3-triphenylpropan-1-ol<sup>3</sup> (20.0 g, 65.9 mmol, 2.1 equiv) and diethyl malonimidate dihydrochloride (7.26 g, 31.4 mmol, 1.0 equiv) was added, followed by 300 mL of DCM. The flask was sealed under partial vacuum, and the suspension was heated to 80 °C for 72 h. After completion, the reaction is cooled to room temperature before 150 mL of water was added. The aqueous layer was extracted with DCM (3×100 mL). The organic phases were combined and dried with MgSO<sub>4</sub>. All volatiles were evaporated to give crude product as a yellow oil, which is then purified by silica chromatography to yield pure **1a** (10.4 g, 52%) as a white solid. <sup>1</sup>H NMR (500 MHz, CDCl<sub>3</sub>) δ/ppm: 7.63–6.90 (m, 30H), 5.85 (dd, *J* = 10.1, 6.5 Hz, 2H), 4.45 (t, *J* = 9.7 Hz, 2H), 4.12 (dd, *J* = 9.0, 6.5 Hz, 2H), 2.87 (s, 2H). <sup>13</sup>C NMR (126 MHz, CDCl<sub>3</sub>) δ 162.51, 129.52 (br.), 127.91 (br.), 126.40, 71.83, 70.69, 61.59, 28.31. Anal. Calc. for C<sub>45</sub>H<sub>38</sub>N<sub>2</sub>O<sub>2</sub>: C 84.61, H 6.00, N 4.39; Found C 84.26, H 6.07, N 4.27.

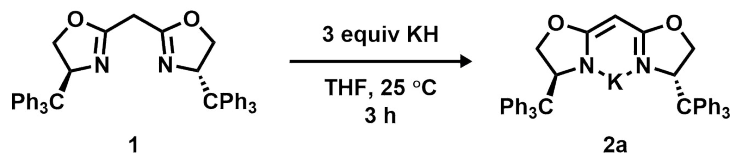

**(TrL)K (2a):** To a 20 mL scintillation vial, KH (93.9 mg, 2.35 mmol, 3.0 equiv) was added followed by 5 mL of THF. To the stirring suspension, a solution of **1a** (0.500 g, 0.78 mmol, 1.0 equiv) in 10 mL of THF was added dropwise. The suspension was left stirring for 3 h at room temperature before filtered to removed unreacted KH. The volatiles were removed to give an off-

white solid. The solid was triturated with 5 mL of hexanes, lyophilized with 5 mL of benzene and washed with an additional 5 mL of benzene to yield **2a** (0.397 g, 75%) as a white solid. <sup>1</sup>H NMR (500 MHz, THF-d<sub>8</sub>) δ 9.16–8.89 (m, 30H), 7.34 (dd, *J* = 9.1, 6.6 Hz, 2H), 6.01 (t, *J* = 8.5 Hz, 2H), 5.31 (t, *J* = 7.2 Hz, 2H), 4.94 (s, 1H). <sup>13</sup>C NMR (126 MHz, THF-d<sub>8</sub>) δ/ppm: 171.84, 132.12 (br.), 129.16 (br.), 127.43, 78.26, 63.99, 53.18, 25.86. Anal. Calc. for C<sub>45</sub>H<sub>37</sub>KN<sub>2</sub>O<sub>2</sub>: C 79.85, H 5.51, N 4.14; Found C 80.22, H 5.77, N 4.02.

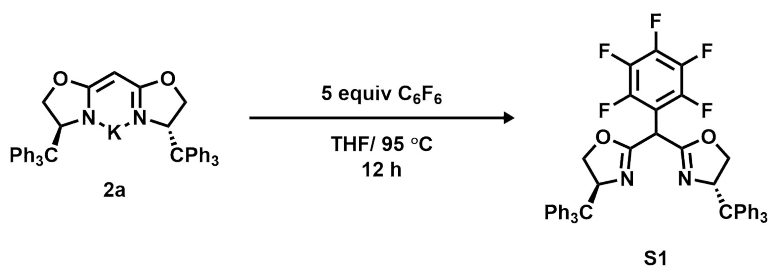

**(4*S*,4'*S*)-2,2'-((perfluorophenyl)methylene)bis(4-trityl-4,5-dihydrooxazole) (S1):** To a 250 mL storage flask in a N<sub>2</sub> filled drybox, a solution of **2a** (0.26 g, 0.38 mmol, 1 equiv) in 100 ml of THF was added, followed by dropwise addition of C<sub>6</sub>F<sub>6</sub> (0.22 mL, 1.92 mmol, 5 equiv). The flask was sealed and heated to 95 °C for 12 h. After cooling to room temperature, the solution was poured into ice-water mixture and extracted with EtOAc (3×100 mL). The organic phases were combined, washed with brine and dried with MgSO<sub>4</sub>. The volatiles were removed in vacuo to give dark red crude product, which is purified using column chromatography to yield **S1** (0.24 g, 78%) as a white solid. <sup>1</sup>H NMR (500 MHz, C<sub>6</sub>D<sub>6</sub>) δ/ppm: 9.06 (s, 1H), 7.96–6.34 (m, 30H), 5.14 (dd, *J* = 8.5, 4.9 Hz, 2H), 4.07–3.61 (m, 4H). <sup>13</sup>C NMR (126 MHz, C<sub>6</sub>D<sub>6</sub>) δ/ppm: 165.02, 145.35 (t, *J* = 242.49 Hz), 139.48 (d, *J* = 260.25 Hz), 137.24 (d, *J* = 254.98 Hz), 129.23 (br.), 128.02 (br.), 126.16 (br.), 110.08 (t, *J* = 19.5 Hz), 69.97, 66.25, 61.53, 58.70. <sup>19</sup>F NMR (471 MHz, C<sub>6</sub>D<sub>6</sub>): -139.17 (dd, *J* = 24.9, 7.1 Hz), -159.17 (t, *J* = 21.6 Hz), -165.56 (td, *J* = 24.9, 7.1 Hz). Anal. Calc. for C<sub>51</sub>H<sub>37</sub>F<sub>5</sub>N<sub>2</sub>O<sub>2</sub>: C 76.11, H 4.63, N 3.48; Found C 76.32, H 4.65, N 3.57.

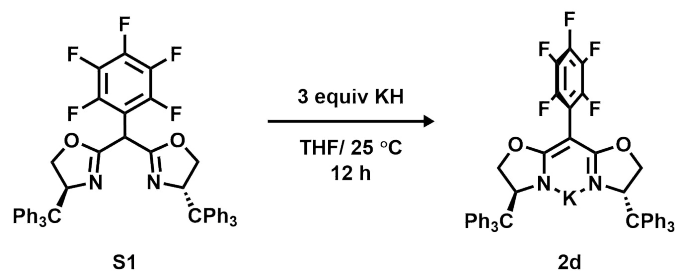

To a 20 mL scintillation vial, KH (35.8 mg, 2.35 mmol, 3.0 equiv) was added followed by 5 mL of THF. To the stirring suspension, a solution of above proteo-ligand (0.24 g, 0.30 mmol, 1.0 equiv) in 10 mL of THF was added dropwise. The suspension was left stirring for 3 h at room temperature before filtered to removed unreacted KH. The volatiles were removed to give a yellow solid. The solid was triturated with 5 mL of hexanes, lyophilized with 5 mL of benzene and washed with an additional 5 mL of benzene to yield **2d** (0.16 g, 63%) as a yellow solid.  $^1\text{H}$  NMR (500 MHz, THF- $d_8$ )  $\delta$  7.94–6.08 (m, 30H), 5.18 (dd,  $J = 9.4, 6.3$  Hz, 2H), 4.28–4.04 (m, 2H), 3.67 (dd,  $J = 7.9, 6.4$  Hz, 2H).  $^{19}\text{F}$  NMR (471 MHz, THF- $d_8$ )  $\delta$  -140.24 (d,  $J = 21.5$  Hz, 2F), -168.20 (t,  $J = 21.2$  Hz, 1F), -170.17–-171.21 (m, 2F). Satisfactory  $^{13}\text{C}$  NMR cannot be obtained for this compound due to its low solubility in common NMR solvents such as THF- $d_8$  and  $\text{C}_6\text{D}_6$ . Anal. Calc. for  $\text{C}_{51}\text{H}_{36}\text{F}_5\text{KN}_2\text{O}_2$ : C 72.67, H 4.30, N 3.32; Found C 72.70, H 4.42, N 3.46.



## Transition Metal Complexes Syntheses

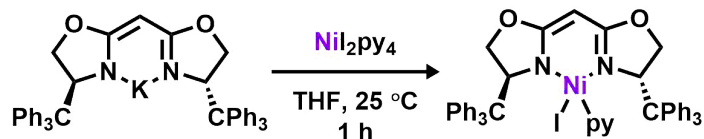

(<sup>TrL</sup>Ni(py)I (**3**): A suspension of Ni(py)<sub>4</sub>I<sub>2</sub> (177 mg, 0.28 mmol, 1 equiv) in 2 mL of THF was frozen. A solution of **2a** (200 mg, 0.30 mmol, 1.05 equiv) in 8 mL of THF was added to the frozen suspension. The mixture was warmed to room temperature and stirred for 1 h, during which time the solution turned from light yellow to maroon. The volatiles were then removed *in vacuo* and the resulting red solid was dissolved in benzene, frozen, and lyophilized. The resulting solid was washed with 20 mL of hexanes, dissolved in 20 mL of benzene, filtered through a Celite plug (20 cm<sup>3</sup>), and lyophilized again to afford (<sup>TrL</sup>Ni(py)I (**3**) as a dark maroon microcrystalline powder (167 mg, 66%). Needle-shaped crystals suitable for X-ray diffraction were grown from layering hexanes on a concentrated benzene solution of **3** at 25 °C overnight. <sup>1</sup>H NMR (600 MHz, C<sub>6</sub>D<sub>6</sub>) δ 181.91, 155.46, 133.70, 46.78, 26.52, 16.31, 15.11, 11.16, 9.90, 9.21, 8.45, 7.98, 0.30, -1.13, -13.93, -63.95. Anal. Calc. for C<sub>50</sub>H<sub>41</sub>IN<sub>3</sub>NiO<sub>2</sub>: C 66.54, H 4.69, N 4.66; Found C 66.52, H 4.76, N 4.62.

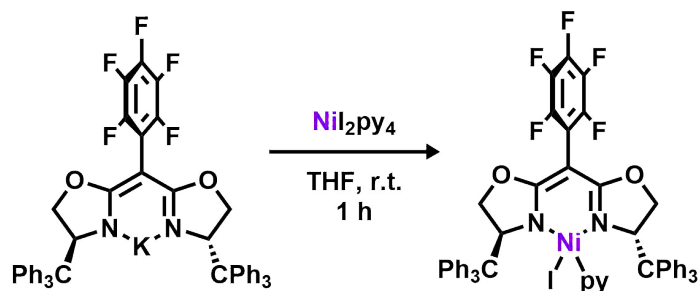

**(<sup>TrF</sup>L)Ni(py)I (3F)**: A suspension of Ni(py)<sub>4</sub>I<sub>2</sub> (142 mg, 0.23 mmol, 1 equiv) in 2 mL of THF was frozen. A solution of **2d** (200 mg, 0.24 mmol, 1.05 equiv) in 8 mL of THF was added to the frozen suspension. The mixture was warmed to room temperature and stirred for 1 h, during which time the solution turned from light yellow to maroon. The volatiles were then removed *in vacuo* and the resulting red solid was dissolved in benzene, frozen, and lyophilized. The resulting solid was washed with 20 mL of hexanes, dissolved in 20 mL of benzene, filtered through a Celite plug (20 cm<sup>3</sup>), and lyophilized again to afford (<sup>TrF</sup>L)Ni(py)I (**3F**) as a dark maroon microcrystalline powder (176 mg, 73%). Needle-shaped crystals suitable for X-ray diffraction were grown from layering hexanes on a concentrated benzene solution of **3F** at 25 °C overnight. <sup>1</sup>H NMR (500 MHz, C<sub>6</sub>D<sub>6</sub>) δ 168.42, 146.39, 47.00, 28.48, 15.84, 15.56, 11.53, 10.14, 9.13, 8.55, 8.06, 0.01, -1.70, -13.35. <sup>19</sup>F NMR (471 MHz, C<sub>6</sub>D<sub>6</sub>) δ -114.75 (d, *J* = 22.0 Hz), -117.88 (d, *J* = 20.2 Hz), -156.03 (t, *J* = 20.8 Hz), -163.09 (t, *J* = 18.5 Hz), -164.84 (t, *J* = 18.9 Hz). Anal. Calc. for C<sub>56</sub>H<sub>41</sub>F<sub>5</sub>IN<sub>3</sub>NiO<sub>2</sub>: C 62.95, H 3.87, N 3.93; Found C 62.67, H 3.96, N 3.65.

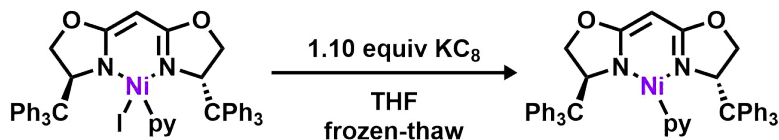

**(<sup>TrL</sup>)Ni(py) (4)**: A solution of **3** (150 mg, 0.18 mmol, 1.00 equiv) in 5 mL of THF was frozen. Potassium graphite (27.1 mg, 0.20 mmol, 1.10 equiv) was added in one portion as soon as the solution started stirring, causing an instantaneous color change from maroon to dark yellow. The solution was stirred for 3 min before filtering through a Celite plug (20 cm<sup>3</sup>). The volatiles were then removed *in vacuo*. The resulting dark yellow solid residue was dissolved in benzene, frozen, and lyophilized. The resulting solid was washed with 2 mL of hexanes, dissolved in 20 ml of

benzene, filtered through a Celite plug (20 cm<sup>3</sup>), and lyophilized again to afford (**TrL**)Ni(py) (**4**) as a dark yellow microcrystalline powder (102 mg, 80%). Needle-shaped X-ray quality crystals were grown by layering hexanes on a concentrated THF solution at 25 °C overnight. <sup>1</sup>H NMR (500 MHz, C<sub>6</sub>D<sub>6</sub>): δ ppm 19.22 (br.), -1.71 (br.). EPR (toluene, 77 K): *g*<sub>1</sub> = 2.12, *g*<sub>2</sub> = 2.06, *g*<sub>3</sub> = 1.98. Anal. Calc. for C<sub>50</sub>H<sub>42</sub>N<sub>3</sub>NiO<sub>2</sub>: C 77.43, H 5.46, N 5.42; Found C 77.15, H 5.38, N 5.47.

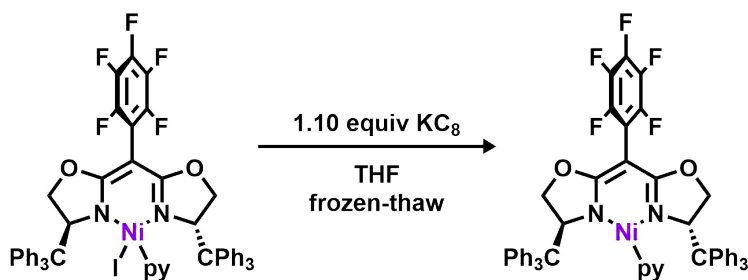

(**Tr<sup>F</sup>L**)Ni(py) (**4F**): A solution of **3F** (100 mg, 0.11 mmol, 1.00 equiv) in 5 mL of THF was frozen. Potassium graphite (15.8 mg, 0.12 mmol, 1.10 equiv) was added in one portion as soon as the solution started stirring, causing an instantaneous color change from maroon to dark yellow. The solution was stirred for 3 min before filtering through a Celite plug (20 cm<sup>3</sup>). The volatiles were then removed in vacuo. The resulting dark yellow solid residue was dissolved in benzene, frozen, and lyophilized. The resulting solid was washed with 2 mL of hexanes, dissolved in 20 mL of benzene, filtered through a Celite plug (20 cm<sup>3</sup>), and lyophilized again to afford (**Tr<sup>F</sup>L**)Ni(py) (**4F**) as a dark yellow microcrystalline powder (68.6 mg, 78%). Needle-shaped X-ray quality crystals were grown by storing a concentrated hexanes solution at -35 °C overnight. <sup>1</sup>H NMR (500 MHz, THF): δ ppm 16.51, -1.31. <sup>19</sup>F NMR (470 MHz, THF): δ ppm -137.65, -161.60, -169.28. EPR (toluene, 77 K): *S* = ½, *g*<sub>1</sub> = 2.43, *g*<sub>2</sub> = 2.13, *g*<sub>3</sub> = 2.07. Anal. Calc. for C<sub>56</sub>H<sub>41</sub>F<sub>5</sub>N<sub>3</sub>NiO<sub>2</sub>: C 71.43, H 4.39, N 4.46; Found C 71.08, H 4.54, N 4.17.

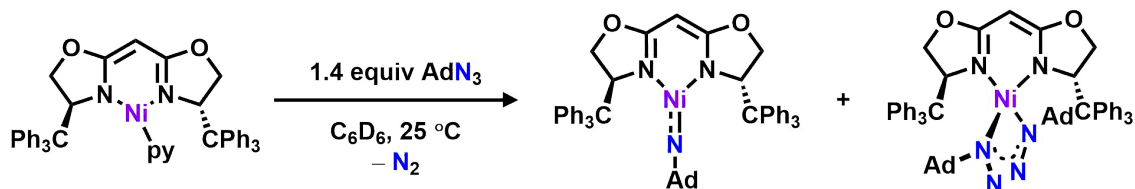

**(<sup>Tr</sup>L)Ni(NAd) (6)**: A solution of (<sup>Tr</sup>L)Ni(py) (**4**) (100 mg, 0.140 mmol, 1.00 equiv) in 5 mL of benzene was frozen in a 20 mL scintillation vial and removed from the freezer. As the solution is thawing and stirring, another solution of AdN<sub>3</sub> (35.6 mg, 0.201 mmol, 1.40 equiv) in 3 mL of benzene was added dropwise slowly over 30 min, during which the solution changed from dark yellow to dark orange. The solution was then lyophilized, and the solid residue was extracted with 5 mL of diethyl ether. All volatiles were removed in vacuo and the resulting green was recrystallized from a concentrated THF solution vapor diffusing into hexanes at  $-35\text{ }^{\circ}\text{C}$  over 3 days to give (<sup>Tr</sup>L)Ni(NAd) (**6**) (8.5 mg, 7%) as dark green plate-shaped crystals suitable for X-ray diffraction. <sup>1</sup>H NMR (500 MHz, C<sub>6</sub>D<sub>6</sub>): this compound is <sup>1</sup>H NMR silent. EPR (toluene, 77 K):  $S = \frac{1}{2}$ ,  $g_1 = 2.19$ ,  $g_2 = 2.06$ ,  $g_3 = 1.93$ ,  $A(^{14}\text{N}) = 20.9\text{ G}$ . Anal. Calc. for C<sub>55</sub>H<sub>52</sub>N<sub>3</sub>NiO<sub>2</sub>: C 78.11, H 6.20, N 4.97; Found C 77.96, H 5.93, N 4.89.

**(<sup>Tr</sup>L)Ni( $\kappa^2$ -N<sub>4</sub>Ad<sub>2</sub>) (5)**: The orange solid residue after diethyl ether extraction above was recrystallized from layering hexanes on a concentrated benzene solution overnight to give (<sup>Tr</sup>L)Ni( $\kappa^2$ -N<sub>4</sub>Ad<sub>2</sub>) (**5**) (35.2 mg, 24%) as dark orange long needle-shaped crystals suitable for X-ray diffraction. <sup>1</sup>H NMR (500 MHz, C<sub>6</sub>D<sub>6</sub>): this compound is <sup>1</sup>H NMR silent. EPR (toluene, 77 K):  $S = \frac{1}{2}$ ,  $g_1 = 2.33$ ,  $g_2 = 2.17$ ,  $g_3 = 2.01$ . Anal. Calc. for C<sub>65</sub>H<sub>67</sub>N<sub>6</sub>NiO<sub>2</sub>: C 76.32, H 6.60, N 8.22; Found C 75.99, H 6.59, N 8.60.

## Organoazide Syntheses

### General procedures for preparation of organoazides.<sup>1</sup>

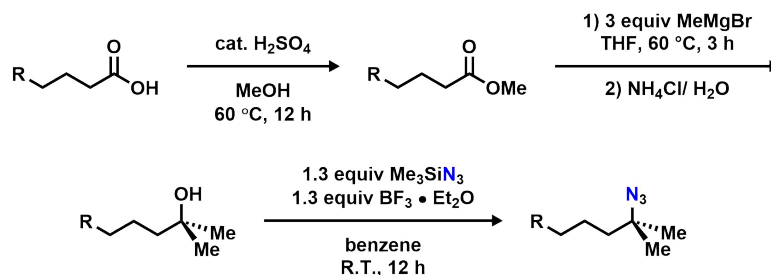

#### Procedure A:

**Step 1:** Catalytic amount of concentrated H<sub>2</sub>SO<sub>4</sub> was added to a solution of the corresponding carboxylic acid (1 equiv) in 200 mL methanol. The reaction mixture was stirred at 60 °C for 12 hours. Upon completion, 10 ml of water was added to the reaction mixture before it was concentrated and diluted in EtOAc. The aqueous phase was extracted three times with 150 ml of EtOAc, and the combined organic phases were washed with brine, dried over MgSO<sub>4</sub>, filtered and concentrated. The product was carried onto the next step without further purification.

**Step 2:** In an air-free storage flask, corresponding ester was added followed by 200 ml of air-free, dry THF under N<sub>2</sub> atmosphere. The solution was cooled to – 78 °C using a dry ice/acetone bath. To the cooled mixture, MeMgBr (3 equiv, 3 M solution in Et<sub>2</sub>O) was added dropwise. The flask was then sealed and heated to 60 °C for 3 hours. The reaction was then poured into an ice/water mixture and extracted three time with 150 ml of EtOAc. The combined organic phases were washed with brine, dried over MgSO<sub>4</sub>, filtered and concentrated. The product was carried onto the next step without further purification.

**Step 3:** In a Schlenk flask under N<sub>2</sub> atmosphere, the corresponding alcohol was added followed by 200 ml of air-free, dry benzene. The solution was cooled to 0 °C using an ice bath before TMSN<sub>3</sub>

(1.3 equiv) was added followed by  $\text{BF}_3 \cdot \text{Et}_2\text{O}$  (1.3 equiv) added as one portion. The reaction was then stirred for 12 hours, poured into water and extracted three times with 150 ml of EtOAc. The combined organic phases were washed with brine, dried over  $\text{MgSO}_4$ , filtered and concentrated. The product was purified using silica chromatography to yield the final organoazide.

Drying: The resulting organoazide was brought into a  $\text{N}_2$ -filled glovebox, dissolved in either hexanes or  $\text{Et}_2\text{O}$  and let sit over 4 Å molecular sieves overnight. The solution was then filtered through a short silica plug and concentrated to provide dry, degassed organoazide for catalysis.

## Characterization of Organoazides

### (4-Azido-4-methylpentyl)benzene (9)<sup>1</sup>

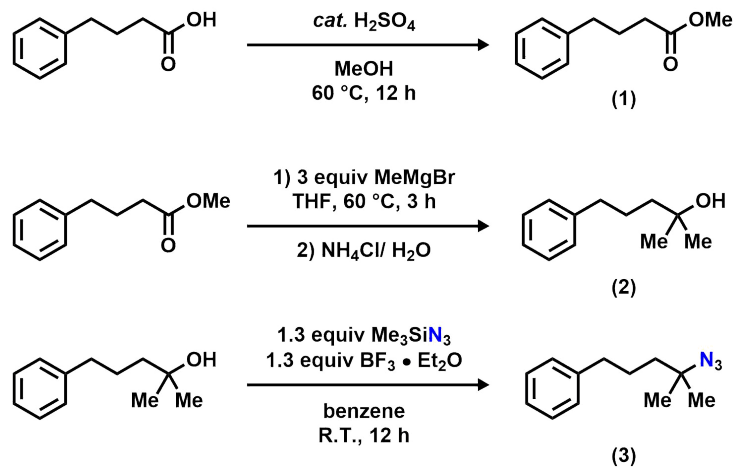

1. Methyl 4-phenylbutanoate (S2): Synthesized following previously reported procedure.

2. 2-Methyl-5-phenylpentan-2-ol (S3): Synthesized following previously reported procedure.

3. (4-azido-4-methylpentyl)benzene (9): Synthesized following previously reported procedure.

**(4-Azido-4-ethylhexyl)benzene (S4)**

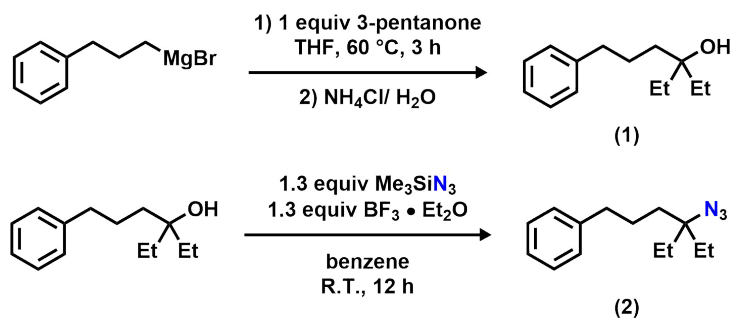

**1. 3-Ethyl-6-phenylhexan-3-ol (S4):** Synthesized following previously reported procedure.<sup>4</sup>

**2. (4-Azido-4-ethylhexyl)benzene (S5):** Synthesized following Procedure A, step 3. The reaction was run on 4.00 mmol scale to give 0.56 g (61% yield) of **S5** as a colorless oil. <sup>1</sup>H NMR (500 MHz, CD<sub>2</sub>Cl<sub>2</sub>) δ 7.43–7.36 (m, 2H), 7.35–7.26 (m, 3H), 2.75 (t, *J* = 7.5 Hz, 2H), 1.84–1.72 (m, 2H), 1.71–1.57 (m, 6H), 0.99 (t, *J* = 7.5 Hz, 6H). <sup>13</sup>C NMR (126 MHz, CD<sub>2</sub>Cl<sub>2</sub>) δ 142.67, 128.84, 128.78, 126.28, 67.56, 36.58, 35.50, 29.01, 25.92, 8.25. HRMS (ESI<sup>+</sup>) *m/z* Calc. 249.2074 [C<sub>14</sub>H<sub>21</sub>N<sub>3</sub>+NH<sub>4</sub>]<sup>+</sup>, Found. 249.2074 [M+NH<sub>4</sub>]<sup>+</sup>.



### (4-Azido-4-ethylhexyl)benzene (S4)

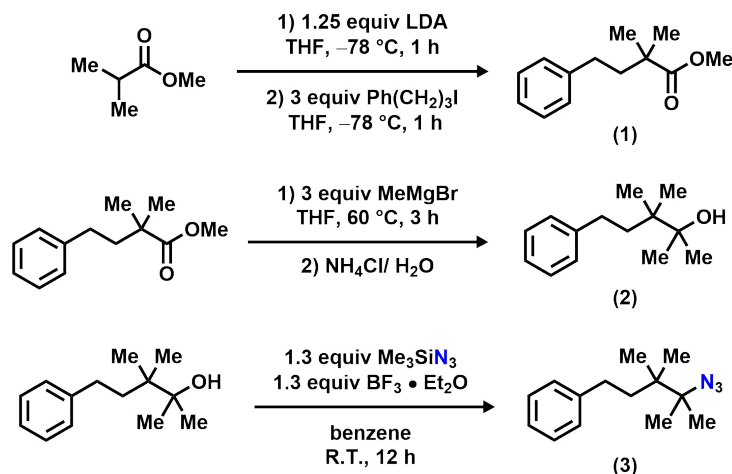

**1. Methyl 2,2-dimethyl-4-phenylbutanoate (S6):** Synthesized following previously reported procedure.<sup>5</sup>

**2. 2,3,3-Trimethyl-5-phenylpentan-2-ol (S7):** Synthesized following Procedure A, step 2. The reaction was run on 10.0 mmol scale to give 1.82 g (88% yield) of **S7** as a colorless oil. <sup>1</sup>H NMR (600 MHz, CD<sub>2</sub>Cl<sub>2</sub>) δ 7.42–7.37 (m, 2H), 7.36–7.32 (m, 2H), 7.31–7.27 (m, 1H), 2.79–2.68 (m, 2H), 1.80–1.72 (m, 3H), 1.31 (s, 6H), 1.13 (s, 6H). <sup>13</sup>C NMR (151 MHz, CD<sub>2</sub>Cl<sub>2</sub>) δ 144.27, 128.86, 128.76, 125.99, 75.71, 40.43, 40.16, 31.90, 25.77, 21.78. HRMS (ESI<sup>+</sup>) m/z Calc. 206.1665 [C<sub>14</sub>H<sub>22</sub>O–e]<sup>+</sup>, Found. 206.1666 [M–e]<sup>+</sup>.

**3. (4-Azido-3,3,4-trimethylpentyl)benzene (S8):** Synthesized following Procedure A, step 3. Separated as a 72:28 mixture of **S8** and (3-azido-3,4,4-trimethylpentyl)benzene (**S9**). The reaction was run on 3.33 mmol scale to give 0.49 g (53% yield) of **S8/S9** as a colorless oil. **S8**: <sup>1</sup>H NMR (500 MHz, CD<sub>2</sub>Cl<sub>2</sub>) δ 7.37–7.30 (m, 2H), 7.30–7.16 (m, 3H), 2.70–2.52 (m, 2H), 1.73–1.58 (m, 2H), 1.34 (s, 6H), 1.05 (s, 6H). **S9**: <sup>1</sup>H NMR (500 MHz, CD<sub>2</sub>Cl<sub>2</sub>) δ 7.38–7.29 (m, 2H), 7.29–7.19 (m, 3H), 2.83–2.70 (m, 2H), 2.04–1.89 (m, 1H), 1.87–1.72 (m, 1H), 1.42 (s, 3H), 1.03 (s, 9H). <sup>13</sup>C

NMR (126 MHz, CD<sub>2</sub>Cl<sub>2</sub>) δ 143.41, 142.44, 128.39, 128.34, 128.30, 125.82, 125.60, 69.29, 67.91, 40.17, 39.67, 39.45, 37.81, 31.16, 31.13, 25.44, 21.50, 21.34, 16.95. HRMS (ESI<sup>+</sup>) m/z Calc. 249.2074 [C<sub>14</sub>H<sub>21</sub>N<sub>3</sub>+NH<sub>4</sub>]<sup>+</sup>, Found. 249.2076 [M+NH<sub>4</sub>]<sup>+</sup>.

### (4-Azido-2,2,4-trimethylpentyl)benzene (S10)

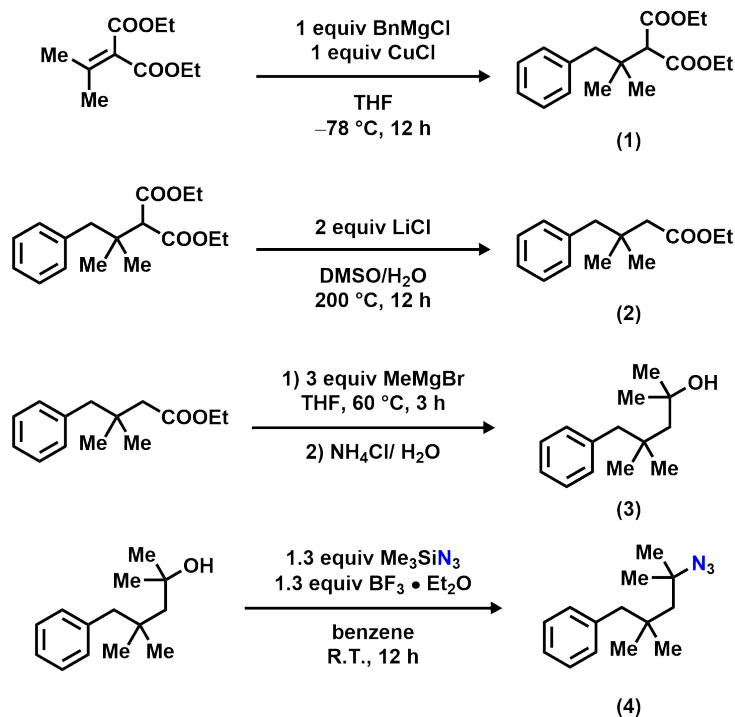

**1. Diethyl 2-(2-methyl-1-phenylpropan-2-yl)malonate (S9):** Synthesized following Procedure A, step 2. The reaction was run on 10.0 mmol scale to give 2.49 g (85% yield) of **S9** as a colorless oil.  $^1\text{H}$  NMR (600 MHz,  $\text{CD}_2\text{Cl}_2$ )  $\delta$  7.30–7.25 (m, 2H), 7.24–7.20 (m, 1H), 7.20–7.15 (m, 2H), 4.18 (q,  $J = 7.2$  Hz, 4H), 3.24 (s, 1H), 2.82 (s, 2H), 1.26 (t,  $J = 7.2$  Hz, 6H), 1.08 (s, 6H).  $^{13}\text{C}$  NMR (151 MHz,  $\text{CD}_2\text{Cl}_2$ )  $\delta$  169.03, 138.77, 131.59, 128.54, 126.95, 61.64, 60.08, 46.68, 37.69, 25.59, 14.66. HRMS (ESI $^+$ )  $m/z$  Calc. 293.1747 [ $\text{C}_{17}\text{H}_{24}\text{O}_4 + \text{H}$ ] $^+$ , Found. 293.1748 [ $\text{M} + \text{H}$ ] $^+$ .

**2. Ethyl 3,3-dimethyl-4-phenylbutanoate (S10):** Synthesized following Procedure A, step 2. The reaction was run on 8.00 mmol scale to give 0.97 g (55% yield) of **S10** as a colorless oil.  $^1\text{H}$  NMR (600 MHz,  $\text{CD}_2\text{Cl}_2$ )  $\delta$  7.29 (t,  $J = 6.9$  Hz, 2H), 7.26–7.17 (m, 3H), 4.14 (q,  $J = 7.1$  Hz, 2H), 2.68 (s, 2H), 2.18 (s, 2H), 1.28 (t,  $J = 7.1$  Hz, 3H), 1.02 (s, 6H).  $^{13}\text{C}$  NMR (126 MHz,  $\text{CD}_2\text{Cl}_2$ )  $\delta$  171.78,

138.42, 130.44, 127.45, 125.73, 59.60, 47.53, 45.13, 33.89, 26.68, 13.87. HRMS (ESI<sup>+</sup>) m/z Calc. 221.1536 [C<sub>14</sub>H<sub>20</sub>O<sub>2</sub>+H]<sup>+</sup>, Found. 221.1537 [M+H]<sup>+</sup>.

**3. 2,4,4-Trimethyl-5-phenylpentan-2-ol (S11):** Synthesized following Procedure A, step 2. The reaction was run on 4.00 mmol scale to give 0.76 g (92% yield) of **S11** as a colorless oil. <sup>1</sup>H NMR (500 MHz, CD<sub>2</sub>Cl<sub>2</sub>) δ 7.26 (d, *J* = 7.5 Hz, 2H), 7.22–7.13 (m, 3H), 2.63 (s, 2H), 1.55 (s, 2H), 1.36 (s, 1H), 1.30 (s, 6H), 1.02 (s, 6H). <sup>13</sup>C NMR (126 MHz, CD<sub>2</sub>Cl<sub>2</sub>) δ 139.08, 130.62, 127.22, 125.43, 71.87, 53.72, 50.50, 34.72, 31.76, 27.52. HRMS (ESI<sup>+</sup>) m/z Calc. 206.1665 [C<sub>14</sub>H<sub>22</sub>O–e]<sup>+</sup>, Found. 206.1664 [M–e]<sup>+</sup>.

**4. (4-Azido-2,2,4-trimethylpentyl)benzene (S12):** Synthesized following Procedure A, step 3. The reaction was run on 3.00 mmol scale to give 0.36 g (52% yield) of **S12** as a colorless oil. <sup>1</sup>H NMR (600 MHz, CDCl<sub>3</sub>) δ 7.41–7.36 (m, 2H), 7.35–7.31 (m, 1H), 7.29–7.24 (m, 2H), 2.74 (s, 2H), 1.68 (s, 2H), 1.47 (s, 6H), 1.15 (s, 6H). <sup>13</sup>C NMR (151 MHz, CDCl<sub>3</sub>) δ 138.72, 130.85, 127.66, 125.96, 61.83, 51.57, 50.60, 35.13, 28.69, 27.64. HRMS (ESI<sup>+</sup>) m/z Calc. 249.2074 [C<sub>14</sub>H<sub>21</sub>N<sub>3</sub>+NH<sub>4</sub>]<sup>+</sup>, Found. 249.2074 [M+NH<sub>4</sub>]<sup>+</sup>.

### 1-(4-Azido-4-methylpentyl)-2-methylbenzene (S13)

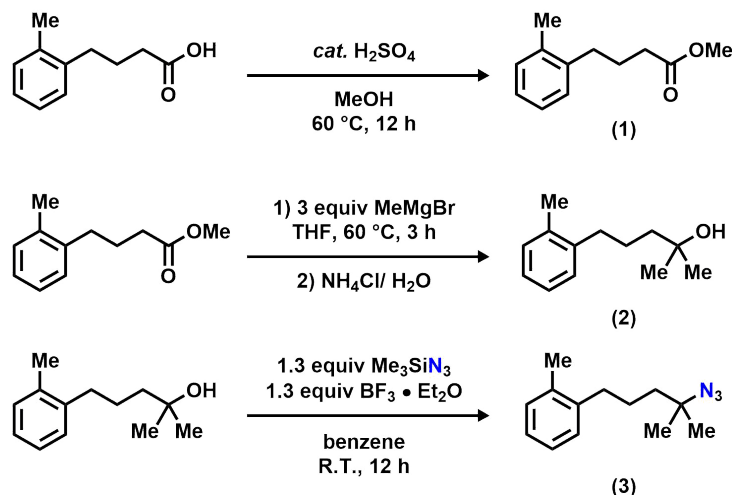

**1. Methyl 4-(*o*-tolyl)butanoate (S13):** Synthesized following Procedure A, step 1. Spectral features are consistent with reported data.<sup>6</sup>

**2. 2-Methyl-5-(*o*-tolyl)pentan-2-ol (S14):** Synthesized following Procedure A, step 2. The reaction was run on 5.00 mmol scale to give 0.80 g (83% yield) of **S14** as a colorless oil. <sup>1</sup>H NMR (600 MHz, CD<sub>2</sub>Cl<sub>2</sub>) δ 7.39–6.74 (m, 4H), 2.86–2.55 (m, 2H), 2.36 (s, 3H), 1.80–1.44 (m, 5H), 1.23 (s, 6H). <sup>13</sup>C NMR (151 MHz, CD<sub>2</sub>Cl<sub>2</sub>) δ 141.29, 136.30, 130.46, 129.18, 126.23, 126.18, 70.96, 44.23, 34.07, 29.49, 25.56, 19.50. HRMS (ESI<sup>+</sup>) *m/z* Calc. 206.1665 [C<sub>14</sub>H<sub>22</sub>O–e]<sup>+</sup>, Found. 206.1665 [M–e]<sup>+</sup>.

**3. (4-Azido-2,2,4-trimethylpentyl)benzene (S15):** Synthesized following Procedure A, step 3. The reaction was run on 4.00 mmol scale to give 0.39 g (45% yield) of **5** as a colorless oil. <sup>1</sup>H NMR (500 MHz, CD<sub>2</sub>Cl<sub>2</sub>) δ 7.27–7.11 (m, 4H), 2.74–2.62 (m, 2H), 2.39 (s, 3H), 1.77–1.68 (m, 2H), 1.68–1.61 (m, 2H), 1.33 (s, 6H). <sup>13</sup>C NMR (126 MHz, CD<sub>2</sub>Cl<sub>2</sub>) δ 140.85, 136.30, 130.52, 129.12, 126.32, 126.30, 61.96, 41.70, 33.76, 26.16, 25.42, 19.49. HRMS (ESI<sup>+</sup>) *m/z* Calc. 235.1917 [C<sub>13</sub>H<sub>19</sub>N<sub>3</sub>+NH<sub>4</sub>]<sup>+</sup>, Found. 235.1919 [M+NH<sub>4</sub>]<sup>+</sup>.

### 1-(4-Azido-4-methylpentyl)-3-methylbenzene (S15)

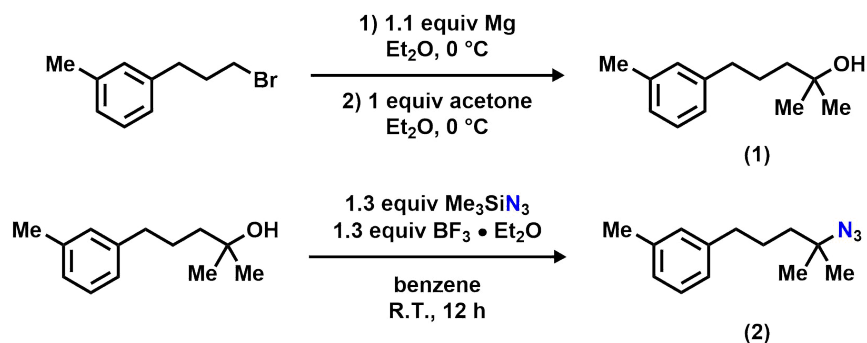

1. 2-Methyl-5-(*m*-tolyl)pentan-2-ol (S16): Synthesized following previously reported procedure.<sup>7</sup>

2. 1-(4-Azido-4-methylpentyl)-3-methylbenzene (S17): Synthesized following Procedure A, step 3. The reaction was run on 4.00 mmol scale to give 0.49 g (56% yield) of S17 as a colorless oil. <sup>1</sup>H NMR (500 MHz, CD<sub>2</sub>Cl<sub>2</sub>) δ 7.29 (t, *J* = 7.5 Hz, 1H), 7.17–7.08 (m, 3H), 2.70 (t, *J* = 7.7 Hz, 2H), 2.45 (s, 3H), 1.85–1.76 (m, 2H), 1.68–1.61 (m, 2H), 1.36 (s, 6H). <sup>13</sup>C NMR (126 MHz, CD<sub>2</sub>Cl<sub>2</sub>) δ 142.60, 138.31, 129.64, 128.67, 127.00, 125.86, 61.96, 41.53, 36.45, 26.71, 26.21, 21.66. HRMS (ESI<sup>+</sup>) *m/z* Calc. 235.1917 [C<sub>13</sub>H<sub>19</sub>N<sub>3</sub>+NH<sub>4</sub>]<sup>+</sup>, Found. 235.1918 [M+NH<sub>4</sub>]<sup>+</sup>.

### 1-(4-Azido-4-methylpentyl)-4-methylbenzene (S18)

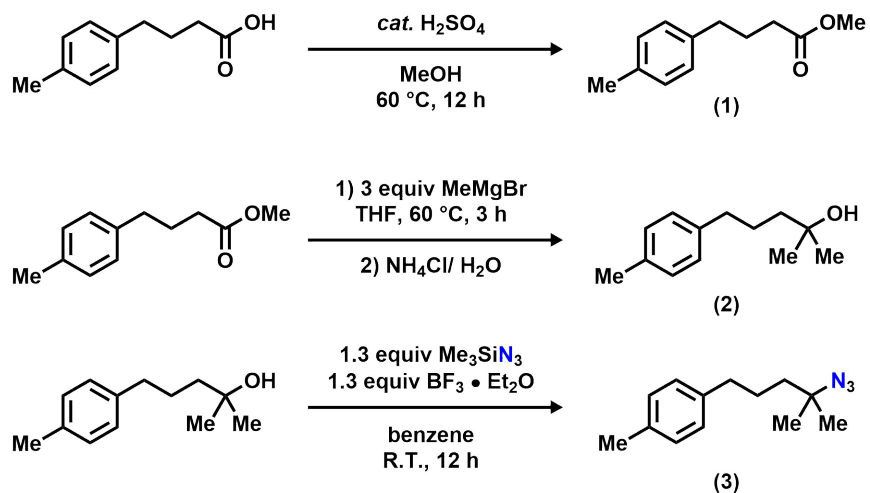

1. Methyl 4-(p-tolyl)butanoate (S18): Synthesized following previously reported procedure.<sup>8</sup>

2. 2-Methyl-5-(p-tolyl)pentan-2-ol (S19): Synthesized following previously reported procedure.<sup>8</sup>

3. 1-(4-Azido-4-methylpentyl)-4-methylbenzene (S20): Synthesized following previously reported procedure.<sup>8</sup>

### 1-(4-Azido-4-methylpentyl)-2,4-dimethylbenzene (S23)

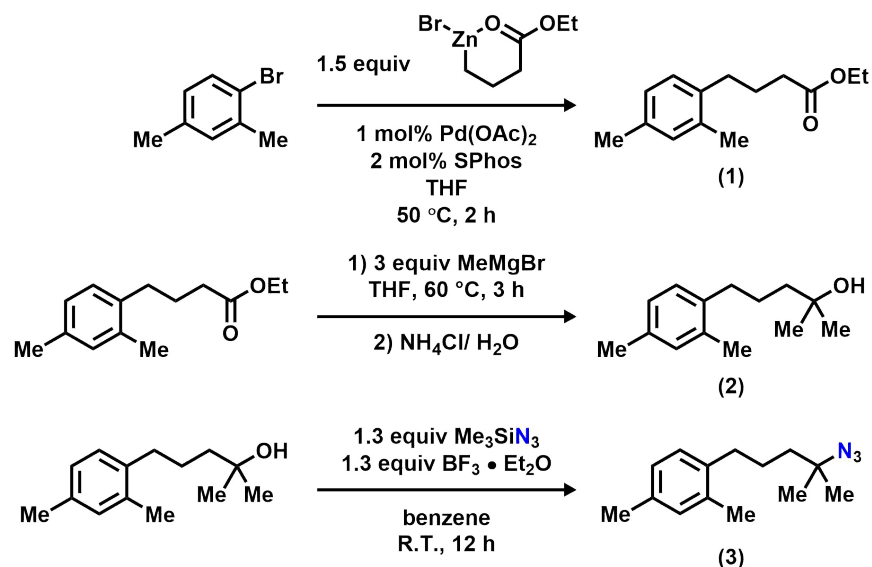

**1. Ethyl 4-(2,4-dimethylphenyl)butanoate (S21):** Synthesized following previously reported procedure. The reaction was run on 10.0 mmol scale to give 1.45 g (66% yield) of **S21** as a colorless oil. <sup>1</sup>H NMR (600 MHz, CD<sub>2</sub>Cl<sub>2</sub>) δ/ppm: 7.02 (d, *J* = 7.6 Hz, 1H), 6.98 (s, 1H), 6.95 (d, *J* = 7.6 Hz, 1H), 4.13 (q, *J* = 7.1 Hz, 2H), 2.66–2.55 (m, 2H), 2.35 (t, *J* = 7.4 Hz, 2H), 2.29 (s, 6H), 1.87 (dt, *J* = 15.2, 7.5 Hz, 2H), 1.27 (t, *J* = 7.1 Hz, 3H). <sup>13</sup>C NMR (151 MHz, CD<sub>2</sub>Cl<sub>2</sub>) δ/ppm: 173.64, 137.17, 136.16, 135.84, 131.30, 129.24, 126.86, 60.54, 34.29, 32.50, 26.02, 21.01, 19.30, 14.49. HRMS (ESI<sup>+</sup>) *m/z* Calc. 221.1536 [C<sub>14</sub>H<sub>20</sub>O<sub>2</sub>+H]<sup>+</sup>, Found. 221.1537 [M+H]<sup>+</sup>.

**2. 5-(2,4-Dimethylphenyl)-2-methylpentan-2-ol (S22):** Synthesized following previously reported procedure. The reaction was run on 6.00 mmol scale to give 1.16 g (94% yield) of **S22** as a colorless oil. <sup>1</sup>H NMR (600 MHz, CD<sub>2</sub>Cl<sub>2</sub>) δ 7.06 (d, *J* = 7.6 Hz, 1H), 7.00 (s, 1H), 6.96 (d, *J* = 7.6 Hz, 1H), 2.66–2.53 (m, 2H), 2.31 (s, 6H), 1.69–1.60 (m, 2H), 1.59–1.50 (m, 2H), 1.44 (s, 1H), 1.22 (s, 6H). <sup>13</sup>C NMR (151 MHz, CD<sub>2</sub>Cl<sub>2</sub>) δ/ppm: 138.13, 136.04, 135.55, 131.23, 129.10, 126.83,



70.97, 44.23, 33.65, 29.48, 25.69, 21.04, 19.43. HRMS (ESI<sup>+</sup>) m/z Calc. 206.1665 [C<sub>14</sub>H<sub>22</sub>O-e]<sup>+</sup>, Found. 206.1667 [M-e]<sup>+</sup>.

**3. 1-(4-Azido-4-methylpentyl)-2,4-dimethylbenzene (S23):** Synthesized following Procedure A, step 3. The reaction was run on 4.00 mmol scale to give 0.38 g (41% yield) of **S23** as a colorless oil. <sup>1</sup>H NMR (600 MHz, CD<sub>2</sub>Cl<sub>2</sub>) δ/ppm: 7.10 (d, *J* = 7.6 Hz, 1H), 7.05 (s, 1H), 7.02 (d, *J* = 7.6 Hz, 1H), 2.69–2.62 (m, 2H), 2.37 (s, 3H), 2.36 (s, 3H), 1.75–1.68 (m, 2H), 1.68–1.62 (m, 2H), 1.34 (s, 6H). <sup>13</sup>C NMR (151 MHz, CD<sub>2</sub>Cl<sub>2</sub>) δ/ppm: 137.73, 136.06, 135.73, 131.37, 129.12, 126.97, 62.00, 41.76, 33.43, 26.20, 25.60, 21.11, 19.47. HRMS (ESI<sup>+</sup>) m/z Calc. 249.2074 [C<sub>14</sub>H<sub>21</sub>N<sub>3</sub>+NH<sub>4</sub>]<sup>+</sup>, Found. 249.2073 [M+NH<sub>4</sub>]<sup>+</sup>.

#### 4-(4-zido-4-methylpentyl)-1,2-dimethylbenzene (S26)

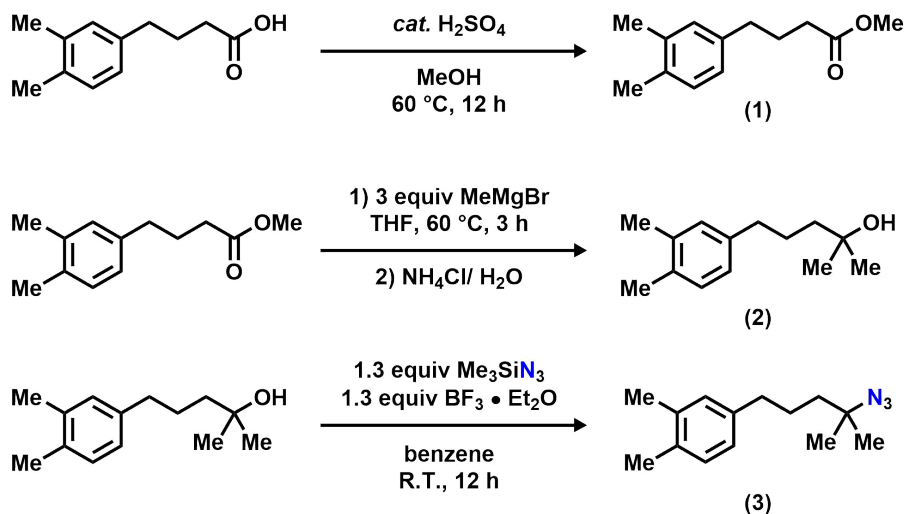

#### 1. Methyl 4-(3,4-dimethylphenyl)butanoate (S24):

Synthesized following Procedure A, step 1.

The reaction was run on 2.60 mmol scale to give 0.48 g (90% yield) of **S24** as a colorless oil.  $^1\text{H}$  NMR (600 MHz,  $\text{CDCl}_3$ )  $\delta$  7.08 (d,  $J = 7.6$  Hz, 1H), 6.99 (s, 1H), 6.95 (d,  $J = 7.6$  Hz, 1H), 3.69 (s, 3H), 2.66–2.56 (m, 2H), 2.36 (t,  $J = 7.5$  Hz, 2H), 2.27 (s, 3H), 2.26 (s, 3H), 1.97 (p,  $J = 7.5$  Hz, 2H).  $^{13}\text{C}$  NMR (151 MHz,  $\text{CDCl}_3$ )  $\delta$  174.00, 138.81, 136.43, 134.03, 129.85, 129.64, 125.85, 51.46, 34.69, 33.45, 26.67, 19.75, 19.31. HRMS ( $\text{ESI}^+$ )  $m/z$  Calc. 207.1380 [ $\text{C}_{13}\text{H}_{18}\text{O}_2+\text{H}$ ] $^+$ , Found. 207.1380 [ $\text{M}+\text{H}$ ] $^+$ .

#### 2. 5-(3,4-Dimethylphenyl)-2-methylpentan-2-ol (S25):

Synthesized following Procedure A, step

2. The reaction was run on 2.00 mmol scale to give 0.33 g (79% yield) of **S25** as a colorless oil.

$^1\text{H}$  NMR (600 MHz,  $\text{CDCl}_3$ )  $\delta$  7.08 (d,  $J = 7.6$  Hz, 1H), 7.00 (s, 1H), 6.96 (d,  $J = 7.6$  Hz, 1H), 2.59 (t,  $J = 7.7$  Hz, 2H), 2.28 (s, 3H), 2.26 (s, 3H), 1.75–1.66 (m, 2H), 1.58–1.51 (m, 2H), 1.46 (s, 1H), 1.23 (s, 6H).  $^{13}\text{C}$  NMR (126 MHz,  $\text{CDCl}_3$ )  $\delta$  139.94, 136.36, 133.79, 129.83, 129.61, 125.77, 70.96, 43.65, 35.97, 29.25, 26.55, 19.81, 19.36. HRMS ( $\text{ESI}^+$ )  $m/z$  Calc. 206.1665 [ $\text{C}_{14}\text{H}_{22}\text{O}-\text{e}$ ] $^+$ , Found. 206.1667 [ $\text{M}-\text{e}$ ] $^+$ .

**3. 4-(4-Azido-4-methylpentyl)-1,2-dimethylbenzene (S26):** Synthesized following Procedure A, step 3. The reaction was run on 1.00 mmol scale to give 0.12 g (52% yield) of **S26** as a colorless oil. <sup>1</sup>H NMR (500 MHz, CD<sub>2</sub>Cl<sub>2</sub>) δ 7.14 (d, *J* = 7.6 Hz, 1H), 7.07 (s, 1H), 7.02 (dd, *J* = 7.6, 1.4 Hz, 1H), 2.66 (t, *J* = 7.6 Hz, 2H), 2.35 (s, 3H), 2.33 (s, 3H), 1.84–1.72 (m, 2H), 1.66–1.58 (m, 2H), 1.35 (s, 6H). <sup>13</sup>C NMR (126 MHz, CD<sub>2</sub>Cl<sub>2</sub>) δ 140.01, 136.80, 134.28, 130.13, 129.95, 126.15, 61.99, 41.54, 36.05, 26.79, 26.19, 19.98, 19.52. HRMS (ESI<sup>+</sup>) *m/z* Calc. 249.2074 [C<sub>14</sub>H<sub>21</sub>N<sub>3</sub>+NH<sub>4</sub>]<sup>+</sup>, Found. 249.2073 [M+NH<sub>4</sub>]<sup>+</sup>.

## 2-(4-Azido-4-methylpentyl)-1,3-dimethylbenzene (S29)

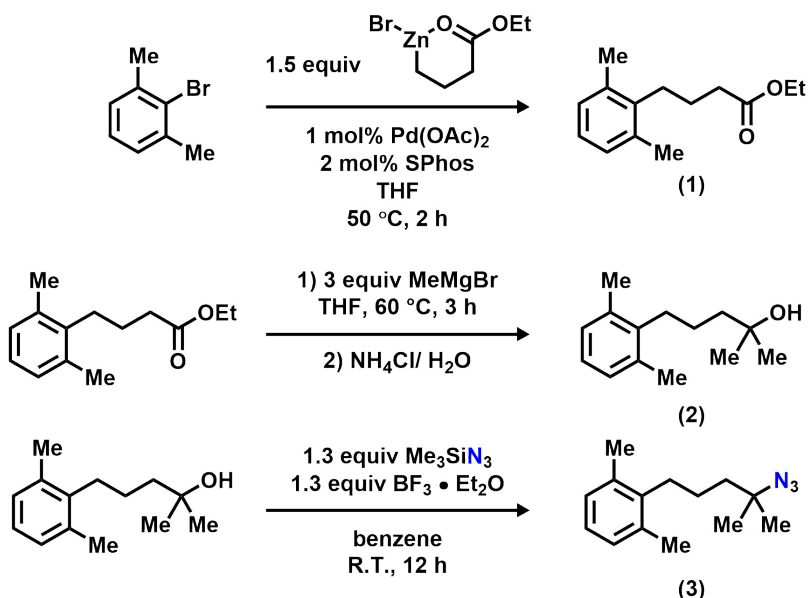

1. **Ethyl 4-(2,6-dimethylphenyl)butanoate (S27)**: Synthesized following previously reported procedure.<sup>9</sup>

2. **5-(2,6-Dimethylphenyl)-2-methylpentan-2-ol (S28)**: Synthesized following Procedure A, step

2. The reaction was run on 6.00 mmol scale to give 1.02 g (82% yield) of **S28** as a colorless oil.

$^1\text{H}$  NMR (600 MHz,  $\text{CD}_2\text{Cl}_2$ )  $\delta$  7.11–7.00 (m, 3H), 2.75–2.64 (m, 2H), 2.40 (s, 6H), 1.73 (s, 1H), 1.70–1.63 (m, 2H), 1.63–1.53 (m, 2H), 1.27 (s, 6H).  $^{13}\text{C}$  NMR (151 MHz,  $\text{CD}_2\text{Cl}_2$ )  $\delta$ /ppm: 142.01, 138.33, 130.46, 127.88, 72.98, 46.77, 32.58, 31.48, 26.57, 22.08. HRMS (ESI<sup>+</sup>)  $m/z$  Calc. 206.1665 [ $\text{C}_{14}\text{H}_{22}\text{O}-\text{e}$ ]<sup>+</sup>, Found. 206.1669 [ $\text{M}-\text{e}$ ]<sup>+</sup>.

3. **2-(4-Azido-4-methylpentyl)-1,3-dimethylbenzene (S29)**: Synthesized following Procedure A,

step 3. The reaction was run on 4.00 mmol scale to give 0.45 g (49% yield) of **S29** as a colorless

oil.  $^1\text{H}$  NMR (600 MHz,  $\text{CD}_2\text{Cl}_2$ )  $\delta$  7.19–7.10 (m, 3H), 2.84–2.72 (m, 2H), 2.48 (s, 6H), 1.84–1.76 (m, 2H), 1.74–1.66 (m, 2H), 1.41 (s, 6H).  $^{13}\text{C}$  NMR (151 MHz,  $\text{CD}_2\text{Cl}_2$ )  $\delta$  139.59, 136.32, 128.62,

126.12, 61.97, 42.22, 30.37, 26.23, 24.49, 20.12. HRMS (ESI<sup>+</sup>) m/z Calc. 249.2074  
[C<sub>14</sub>H<sub>21</sub>N<sub>3</sub>+NH<sub>4</sub>]<sup>+</sup>, Found. 249.2074 [M+NH<sub>4</sub>]<sup>+</sup>.

## 2-(4-Azido-4-methylpentyl)-1,4-dimethylbenzene (S32)

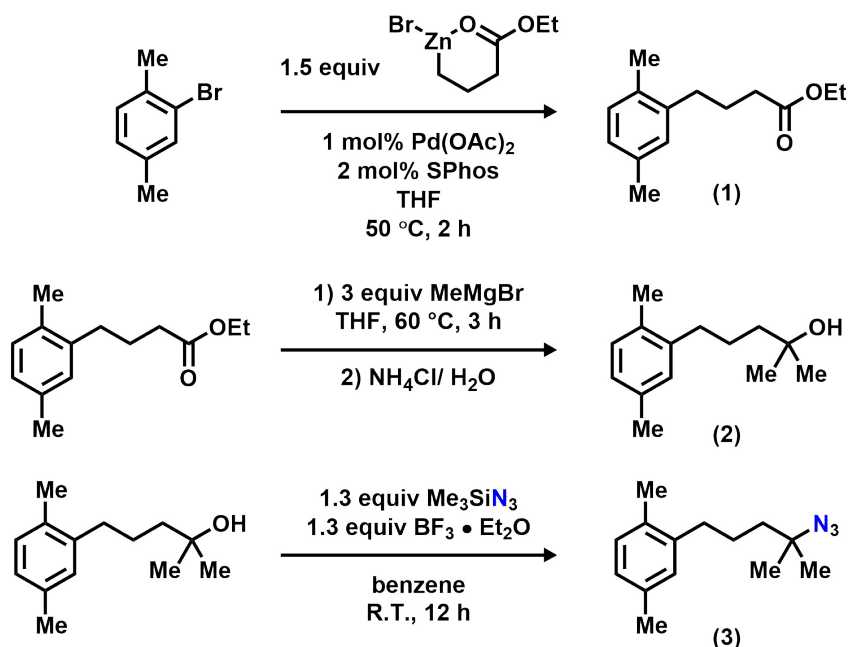

**1. Ethyl 4-(2,5-dimethylphenyl)butanoate (S30):** Synthesized following previously reported procedure.<sup>9</sup>

**2. 5-(2,5-Dimethylphenyl)-2-methylpentan-2-ol (S31):** Synthesized following Procedure A, step

2. The reaction was run on 6.00 mmol scale to give 1.10 g (89% yield) of **S31** as a colorless oil.

<sup>1</sup>H NMR (600 MHz, CDCl<sub>3</sub>) δ 7.12 (d, *J* = 7.7 Hz, 1H), 7.07 (s, 1H), 7.01 (d, *J* = 7.7 Hz, 1H), 2.71–2.63 (m, 2H), 2.40 (s, 3H), 2.37 (s, 3H), 2.03 (s, 1H), 1.80–1.70 (m, 2H), 1.69–1.60 (m, 2H), 1.30 (s, 6H). <sup>13</sup>C NMR (126 MHz, CDCl<sub>3</sub>) δ 140.43, 135.07, 132.49, 130.00, 129.55, 126.48, 70.75, 43.82, 33.66, 29.13, 25.17, 20.94, 18.81. HRMS (ESI<sup>+</sup>) *m/z* Calc. 206.1665 [C<sub>14</sub>H<sub>22</sub>O-e]<sup>+</sup>, Found. 206.1666 [M-e]<sup>+</sup>.

**3. 2-(4-Azido-4-methylpentyl)-1,4-dimethylbenzene (S32):** Synthesized following Procedure A,

step 3. The reaction was run on 4.00 mmol scale to give 0.41 g (44% yield) of **S32** as a colorless

oil. <sup>1</sup>H NMR (600 MHz, CD<sub>2</sub>Cl<sub>2</sub>) δ 7.03 (d, *J* = 7.6 Hz, 1H), 6.97 (s, 1H), 6.92 (d, *J* = 7.6 Hz, 1H),

2.61–2.55 (m, 2H), 2.30 (s, 3H), 2.27 (s, 3H), 1.71–1.55 (m, 4H), 1.28 (s, 6H).  $^{13}\text{C}$  NMR (151 MHz,  $\text{CD}_2\text{Cl}_2$ )  $\delta$  140.63, 135.64, 133.03, 130.36, 129.88, 126.90, 62.00, 41.72, 33.75, 26.14, 25.51, 21.08, 18.95. HRMS (ESI $^+$ )  $m/z$  Calc. 249.2074 [ $\text{C}_{14}\text{H}_{21}\text{N}_3+\text{NH}_4$ ] $^+$ , Found. 249.2074 [ $\text{M}+\text{NH}_4$ ] $^+$ .

### 1-(4-Azido-4-methylpentyl)-2,3-dimethylbenzene (S35)

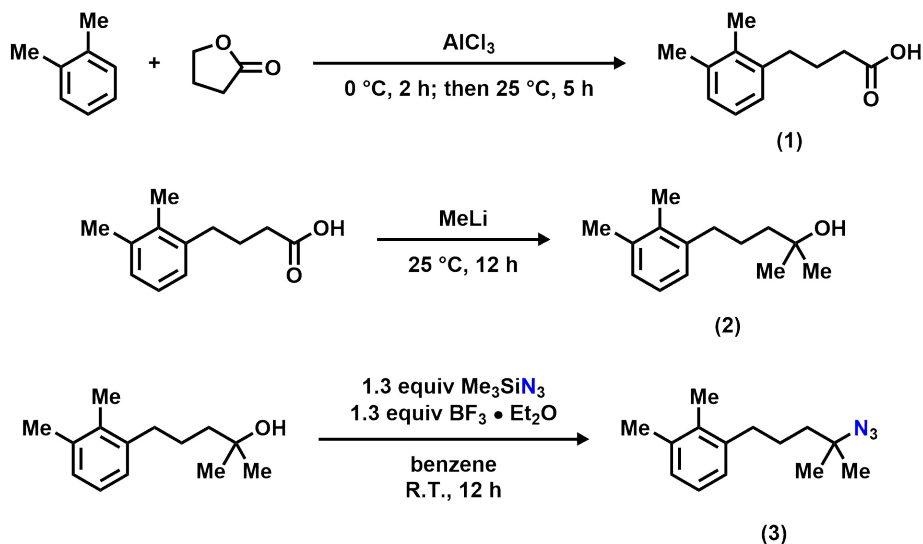

1. 4-(2,3-Dimethylphenyl)butanoic acid (S33): Synthesized following previously reported procedure.<sup>10</sup>

2. 5-(2,3-Dimethylphenyl)-2-methylpentan-2-ol (S34): Synthesized following previously reported procedure.<sup>11</sup>

3. 1-(4-azido-4-methylpentyl)-2,3-dimethylbenzene (S35): Synthesized following Procedure A, step 3. The reaction was run on 4.00 mmol scale to give 0.49 g (53% yield) of S35 as a colorless oil. <sup>1</sup>H NMR (600 MHz, CD<sub>2</sub>Cl<sub>2</sub>) δ 7.24–6.93 (m, 3H), 2.72 (t, *J* = 7.6 Hz, 2H), 2.37 (s, 3H), 2.31 (s, 3H), 1.82–1.61 (m, 4H), 1.35 (s, 6H). <sup>13</sup>C NMR (151 MHz, CD<sub>2</sub>Cl<sub>2</sub>) δ 140.69, 137.28, 134.82, 128.11, 127.31, 125.73, 61.99, 41.79, 34.62, 26.20, 25.88, 20.92, 15.22. HRMS (ESI<sup>+</sup>) *m/z* Calc. 249.2074 [C<sub>14</sub>H<sub>21</sub>N<sub>3</sub>+NH<sub>4</sub>]<sup>+</sup>, Found. 249.2074 [M+NH<sub>4</sub>]<sup>+</sup>.



### 1-(4-Azido-4-methylpentyl)-3,5-dimethylbenzene (S38)

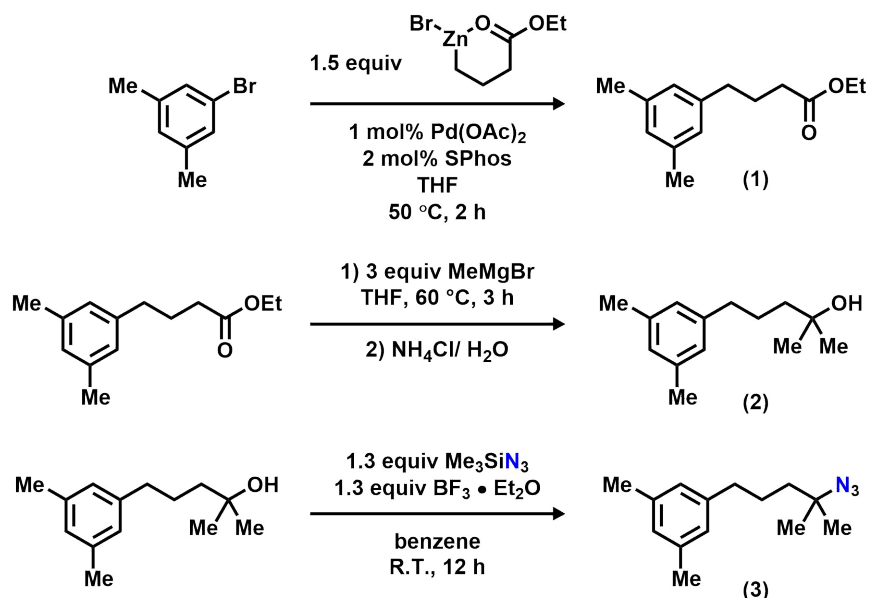

**1. Ethyl 4-(3,5-dimethylphenyl)butanoate (S36):** Synthesized following previously reported procedure.<sup>9</sup> The reaction was run on 10.0 mmol scale to give 1.67 g (76% yield) of **S36** as a colorless oil. <sup>1</sup>H NMR (600 MHz, CD<sub>2</sub>Cl<sub>2</sub>) δ 6.86 (s, 1H), 6.84 (s, 2H), 4.14 (q, *J* = 7.1 Hz, 2H), 2.74–2.48 (m, 2H), 2.45–2.19 (m, 8H), 2.06–1.78 (m, 2H), 1.27 (t, *J* = 7.2 Hz, 3H). <sup>13</sup>C NMR (151 MHz, CD<sub>2</sub>Cl<sub>2</sub>) δ 173.65, 141.95, 138.19, 127.91, 126.76, 60.54, 35.43, 34.10, 27.18, 21.46, 14.56. HRMS (ESI<sup>+</sup>) *m/z* Calc. 221.1536 [C<sub>14</sub>H<sub>20</sub>O<sub>2</sub>+H]<sup>+</sup>, Found. 221.1537 [M+H]<sup>+</sup>.

**2. 5-(3,5-dimethylphenyl)-2-methylpentan-2-ol (S37):** Synthesized following Procedure A, step 2. The reaction was run on 6.00 mmol scale to give 1.01 g (82% yield) of **S37** as a colorless oil. <sup>1</sup>H NMR (600 MHz, CD<sub>2</sub>Cl<sub>2</sub>) δ 6.86 (s, 3H), 2.58 (t, *J* = 7.8 Hz, 2H), 2.33 (s, 6H), 1.77–1.63 (m, 2H), 1.59–1.47 (m, 2H), 1.22 (s, 6H). <sup>13</sup>C NMR (151 MHz, CD<sub>2</sub>Cl<sub>2</sub>) δ 142.98, 138.06, 127.68, 126.70, 70.97, 44.09, 36.72, 29.52, 26.91, 21.50. HRMS (ESI<sup>+</sup>) *m/z* Calc. 206.1665 [C<sub>14</sub>H<sub>22</sub>O-e]<sup>+</sup>, Found. 206.1666 [M-e]<sup>+</sup>.

**3. 2-(4-Azido-4-methylpentyl)-3,5-dimethylbenzene (S38):** Synthesized following Procedure A, step 3. The reaction was run on 4.00 mmol scale to give 0.49 g (53% yield) of **S38** as a colorless oil. <sup>1</sup>H NMR (600 MHz, CD<sub>2</sub>Cl<sub>2</sub>) δ/ppm: 6.89 (s, 1H), 6.87 (s, 2H), 2.60 (t, J = 7.7 Hz, 2H), 2.35 (s, 5H), 1.78 – 1.68 (m, 3H), 1.63 – 1.54 (m, 2H), 1.31 (s, 4H). <sup>13</sup>C NMR (151 MHz, CD<sub>2</sub>Cl<sub>2</sub>) δ/ppm: 13C NMR (151 MHz, cd2cl2) δ 142.50, 138.13, 127.73, 126.57, 62.00, 41.51, 36.31, 26.67, 26.15, 21.44. HRMS (ESI<sup>+</sup>) m/z Calc. 249.2074 [C<sub>14</sub>H<sub>21</sub>N<sub>3</sub>+NH<sub>4</sub>]<sup>+</sup>, Found. 249.2074 [M+NH<sub>4</sub>]<sup>+</sup>.

### 1-(4-Azido-4-methylpentyl)-3,5-di-tert-butylbenzene (S41)

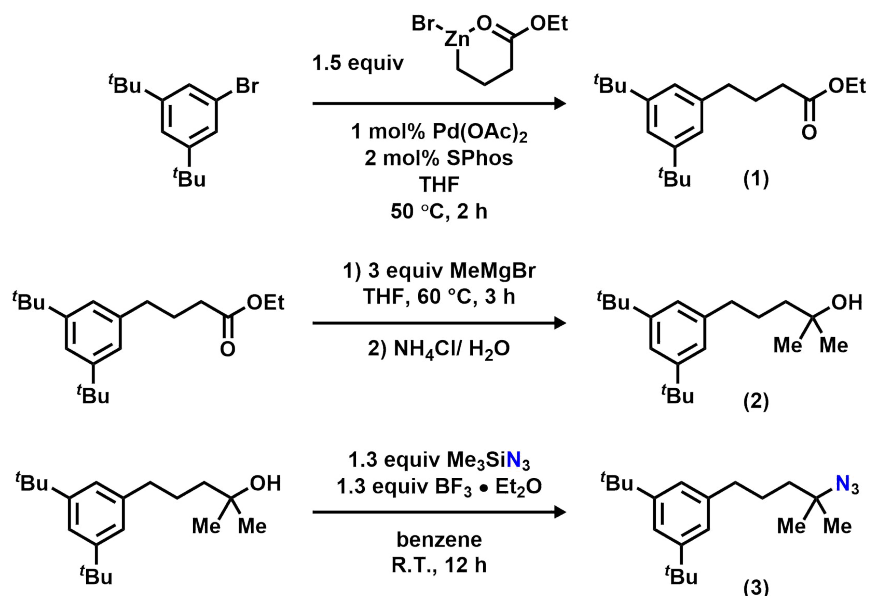

**1. Ethyl 4-(3,5-bis-tert-butylphenyl)butanoate (S39):** Synthesized following previously reported procedure.<sup>9</sup> The reaction was run on 10.0 mmol scale to give 1.43 g (47% yield) of **S39** as a colorless oil. <sup>1</sup>H NMR (600 MHz, CD<sub>2</sub>Cl<sub>2</sub>) δ 7.26 (t, *J* = 1.7 Hz, 1H), 7.03 (d, *J* = 1.7 Hz, 2H), 4.11 (q, *J* = 7.1 Hz, 2H), 2.81–2.58 (m, 2H), 2.32 (t, *J* = 7.5 Hz, 2H), 2.07–1.76 (m, 2H), 1.32 (s, 18H), 1.24 (t, *J* = 7.1 Hz, 3H). <sup>13</sup>C NMR (151 MHz, CD<sub>2</sub>Cl<sub>2</sub>) δ 173.72, 151.14, 141.23, 123.08, 120.31, 60.54, 36.09, 35.08, 34.23, 31.70, 27.46, 14.54. HRMS (ESI<sup>+</sup>) *m/z* Calc. 305.2475 [C<sub>20</sub>H<sub>32</sub>O<sub>2</sub>+H]<sup>+</sup>, Found. 305.2477 [M+H]<sup>+</sup>.

**2. 5-(3,5-bis-tert-butylphenyl)-2-methylpentan-2-ol (S40):** Synthesized following Procedure A, step 2. The reaction was run on 4.00 mmol scale to give 0.90 g (77% yield) of **S40** as a colorless oil. <sup>1</sup>H NMR (600 MHz, CD<sub>2</sub>Cl<sub>2</sub>) δ 7.26 (t, *J* = 1.8 Hz, 1H), 7.05 (d, *J* = 1.8 Hz, 2H), 2.66–2.56 (m, 2H), 1.74–1.64 (m, 2H), 1.58–1.50 (m, 2H), 1.33 (s, 18H), 1.20 (s, 6H). <sup>13</sup>C NMR (151 MHz, CD<sub>2</sub>Cl<sub>2</sub>) δ 151.04, 142.21, 122.97, 120.08, 71.01, 44.28, 37.41, 35.08, 31.73, 29.54, 27.19. HRMS (ESI<sup>+</sup>) *m/z* Calc. 290.2604 [C<sub>20</sub>H<sub>34</sub>O-e]<sup>+</sup>, Found. 290.2600 [M-e]<sup>+</sup>.

**3. 2-(4-Azido-4-methylpentyl)-3,5-bis-tert-butylbenzene (S41):** Synthesized following Procedure A, step 3. The reaction was run on 2.00 mmol scale to give 0.28 g (45% yield) of **S41** as a colorless oil. <sup>1</sup>H NMR (600 MHz, CD<sub>2</sub>Cl<sub>2</sub>) δ 7.37 (t, *J* = 1.8 Hz, 1H), 7.15 (d, *J* = 1.8 Hz, 2H), 2.71 (t, *J* = 7.8 Hz, 2H), 1.86–1.76 (m, 2H), 1.71–1.64 (m, 2H), 1.44 (s, 18H), 1.36 (s, 6H). <sup>13</sup>C NMR (151 MHz, CD<sub>2</sub>Cl<sub>2</sub>) δ 151.21, 141.85, 123.07, 120.31, 62.07, 41.78, 37.16, 35.22, 31.90, 27.05, 26.32. HRMS (ESI<sup>+</sup>) *m/z* Calc. 333.3013 [C<sub>20</sub>H<sub>33</sub>N<sub>3</sub>+NH<sub>4</sub>]<sup>+</sup>, Found. 333.3014 [M+NH<sub>4</sub>]<sup>+</sup>.

### 5'-(4-Azido-4-methylpentyl)-1,1':3',1''-terphenyl (S44)

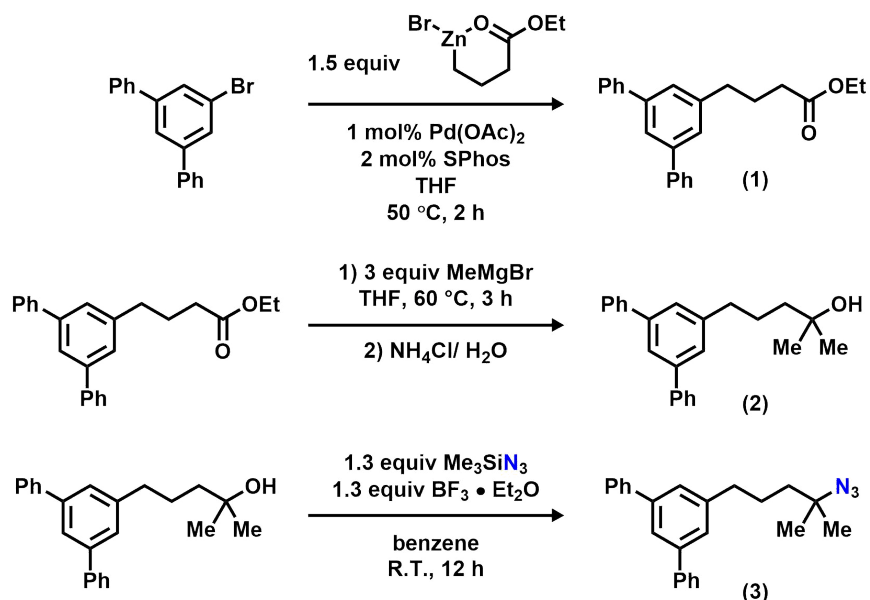

**1. Ethyl 4-([1,1':3',1''-terphenyl]-5'-yl)butanoate (S42):** Synthesized following previously reported procedure.<sup>9</sup> The reaction was run on 10.0 mmol scale to give 2.85 g (83% yield) of **S42** as a colorless oil. <sup>1</sup>H NMR (600 MHz, CD<sub>2</sub>Cl<sub>2</sub>) δ 7.71–7.65 (m, 5H), 7.51–7.41 (m, 6H), 7.41–7.34 (m, 2H), 4.11 (q, *J* = 7.1 Hz, 2H), 2.80 (t, *J* = 7.6 Hz, 2H), 2.38 (t, *J* = 7.6 Hz, 2H), 2.04 (p, *J* = 7.5 Hz, 2H), 1.24 (t, *J* = 7.1 Hz, 3H). <sup>13</sup>C NMR (151 MHz, CD<sub>2</sub>Cl<sub>2</sub>) δ 173.59, 143.21, 142.19, 141.59, 129.19, 127.80, 127.59, 126.82, 124.13, 60.60, 35.65, 34.05, 27.10, 14.49. HRMS (ESI<sup>+</sup>) *m/z* Calc. 345.1849 [C<sub>24</sub>H<sub>24</sub>O<sub>2</sub>+H]<sup>+</sup>, Found. 345.1851 [M+H]<sup>+</sup>.

**2. 5-([1,1':3',1''-Terphenyl]-5'-yl)-2-methylpentan-2-ol (S43):** Synthesized following Procedure A, step 2. The reaction was run on 6.00 mmol scale to give 1.75 g (88% yield) of **S43** as a colorless oil. <sup>1</sup>H NMR (600 MHz, CD<sub>2</sub>Cl<sub>2</sub>) δ 7.79–7.70 (m, 5H), 7.57–7.49 (m, 6H), 7.48–7.38 (m, 2H), 2.83 (t, *J* = 7.8 Hz, 2H), 1.95–1.80 (m, 2H), 1.72–1.58 (m, 2H), 1.51 (s, 1H), 1.27 (s, 6H). <sup>13</sup>C NMR (151 MHz, CD<sub>2</sub>Cl<sub>2</sub>) δ 144.24, 142.12, 141.69, 129.20, 127.78, 127.62, 126.75,

123.94, 70.95, 44.01, 36.95, 29.54, 26.88. HRMS (ESI<sup>+</sup>) m/z Calc. 330.1978 [C<sub>24</sub>H<sub>26</sub>O-e]<sup>+</sup>, Found. 330.1981 [M -e]<sup>+</sup>.

**3. 5'-(4-Azido-4-methylpentyl)-1,1':3',1''-terphenyl (S44):** Synthesized following Procedure A, step 3. The reaction was run on 4.00 mmol scale to give 0.78 g (55% yield) of **S44** as a colorless oil. <sup>1</sup>H NMR (600 MHz, CD<sub>2</sub>Cl<sub>2</sub>) δ 7.74–7.68 (m, 5H), 7.53–7.48 (m, 4H), 7.47 (d, *J* = 1.7 Hz, 2H), 7.44–7.39 (m, 2H), 2.80 (t, *J* = 7.7 Hz, 2H), 1.87–1.79 (m, 2H), 1.67–1.61 (m, 2H), 1.30 (s, 6H). <sup>13</sup>C NMR (151 MHz, CD<sub>2</sub>Cl<sub>2</sub>) δ 143.80, 142.17, 141.63, 129.19, 127.79, 127.60, 126.69, 124.04, 61.98, 41.48, 36.58, 26.69, 26.16. HRMS (ESI<sup>+</sup>) m/z Calc. 373.2387 [C<sub>24</sub>H<sub>25</sub>N<sub>3</sub>+NH<sub>4</sub>]<sup>+</sup>, Found. 373.2390 [M+NH<sub>4</sub>]<sup>+</sup>.

**(5-Azido-5-methylhexan-2-yl)benzene (S47)**

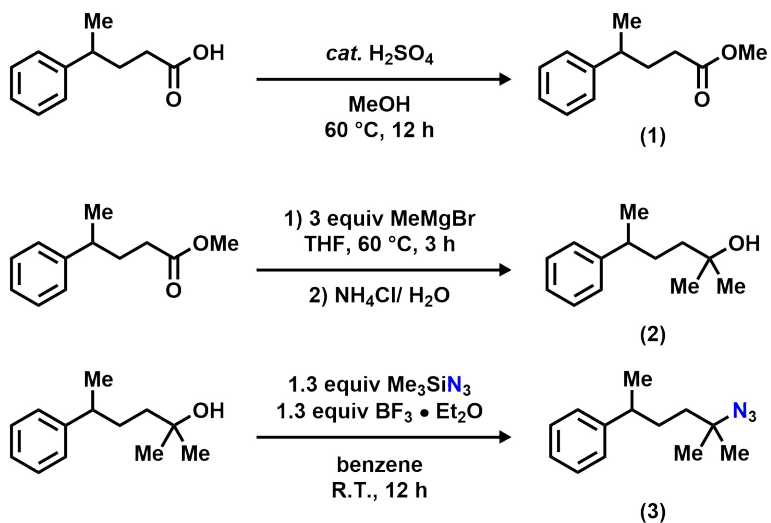

1. **Methyl 4-phenylpentanoate (S45)**: Synthesized following previously reported procedure.<sup>1</sup>

2. **2-Methyl-5-phenylhexan-2-ol (S46)**: Synthesized following previously reported procedure.<sup>1</sup>

3. **(5-Azido-5-methylhexan-2-yl)benzene (S47)**: Synthesized following previously reported procedure.<sup>1</sup>

**(6-Azido-6-methylheptan-3-yl)benzene (S49)**

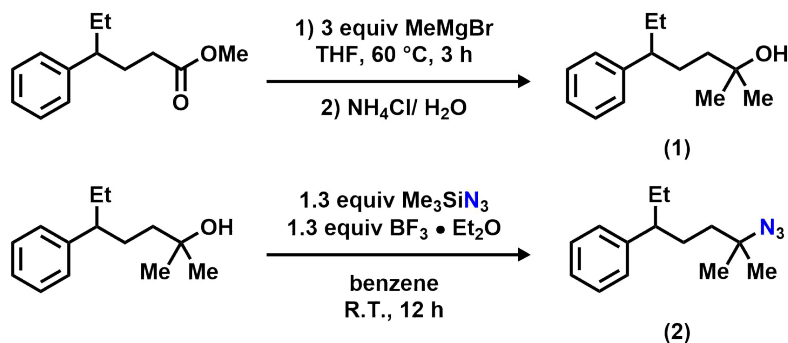

**1. 2-Methyl-5-phenylheptan-2-ol (S48):** Synthesized following Procedure A, step 2. The reaction was run on 2.40 mmol scale to give 0.40 g (80% yield) of **S48** as a colorless oil. <sup>1</sup>H NMR (600 MHz, CD<sub>2</sub>Cl<sub>2</sub>) δ 7.37–7.32 (m, 2H), 7.26–7.18 (m, 3H), 2.43 (tt, *J* = 9.6, 5.2 Hz, 1H), 1.84–1.73 (m, 2H), 1.72–1.58 (m, 3H), 1.43 (td, *J* = 13.0, 4.5 Hz, 1H), 1.26 (td, *J* = 13.0, 4.5 Hz, 1H), 1.17 (s, 3H), 1.17 (s, 3H), 0.84 (t, *J* = 7.4 Hz, 3H). <sup>13</sup>C NMR (151 MHz, CD<sub>2</sub>Cl<sub>2</sub>) δ 146.28, 128.64, 128.19, 126.27, 70.92, 48.76, 42.34, 31.43, 30.33, 29.54, 29.34, 12.46. HRMS (ESI<sup>+</sup>) *m/z* Calc. 206.1665 [C<sub>14</sub>H<sub>22</sub>O–e]<sup>+</sup>, Found. 206.1667 [M–e]<sup>+</sup>.

**2. (6-Azido-6-methylheptan-3-yl)benzene (S49):** Synthesized following Procedure A, step 3. The reaction was run on 1.50 mmol scale to give 0.17 g (49% yield) of **S49** as a colorless oil. <sup>1</sup>H NMR (600 MHz, CD<sub>2</sub>Cl<sub>2</sub>) δ 7.41–7.34 (m, 2H), 7.30–7.26 (m, 1H), 7.26–7.21 (m, 2H), 2.51–2.43 (m, 1H), 1.88–1.62 (m, 4H), 1.51 (ddd, *J* = 13.7, 12.5, 4.5 Hz, 1H), 1.35 (ddd, *J* = 13.7, 12.5, 4.5 Hz, 1H), 1.28 (s, 3H), 1.27 (s, 3H), 0.87 (t, *J* = 7.4 Hz, 3H). <sup>13</sup>C NMR (151 MHz, CD<sub>2</sub>Cl<sub>2</sub>) δ 145.84, 128.77, 126.46, 61.98, 48.57, 39.92, 31.28, 30.41, 26.33, 26.06, 12.44. HRMS (ESI<sup>+</sup>) *m/z* Calc. 249.2074 [C<sub>14</sub>H<sub>21</sub>N<sub>3</sub>+NH<sub>4</sub>]<sup>+</sup>, Found. 249.2075 [M+NH<sub>4</sub>]<sup>+</sup>.



### 1-(5-azido-5-methylhexan-2-yl)-3,5-dimethylbenzene (S55)

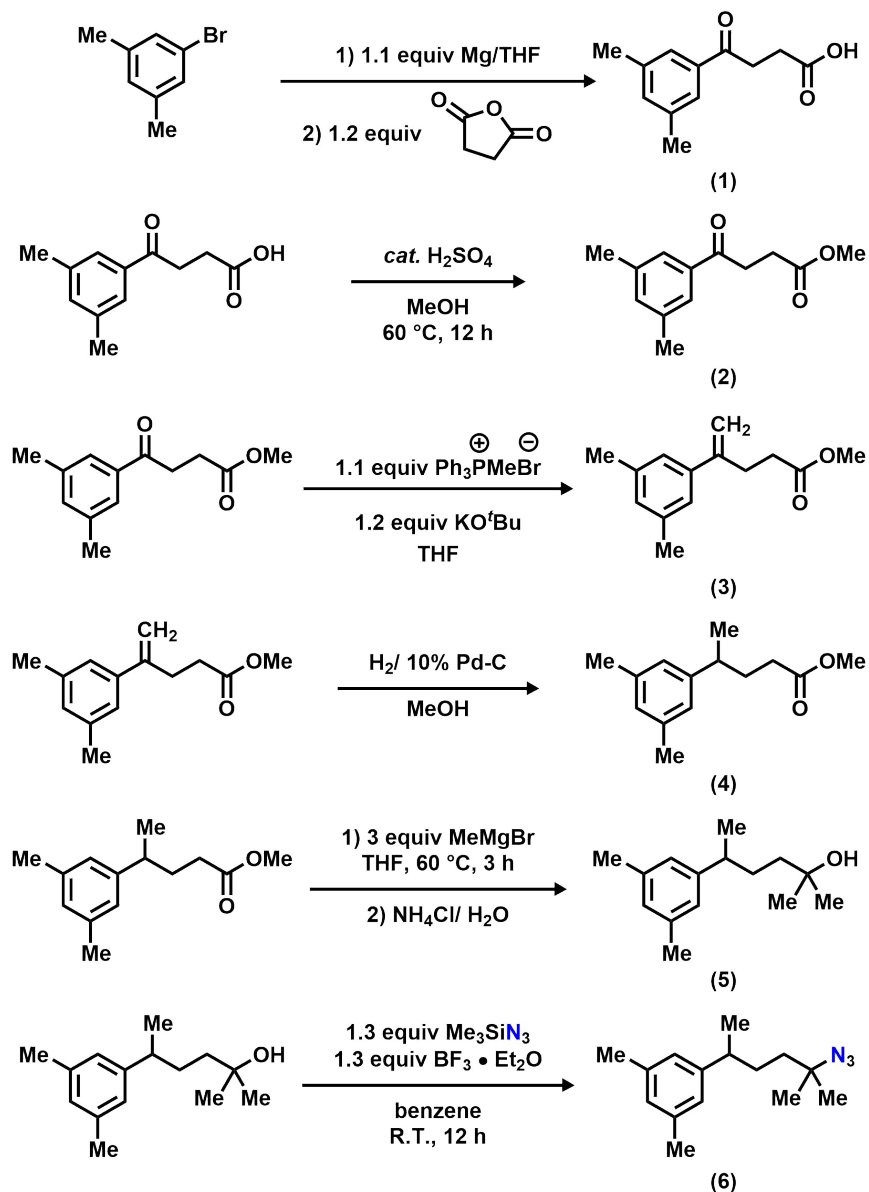

**1. 4-(3,5-Dimethylphenyl)-4-oxobutanoic acid (S50):** Synthesized following previously reported procedure.<sup>12</sup> The reaction was run on 20.0 mmol scale to give 2.60 g (63% yield) of **S50** as a colorless oil.  $^1\text{H}$  NMR (600 MHz,  $\text{CD}_2\text{Cl}_2$ )  $\delta$  7.60 (s, 2H), 7.25 (s, 1H), 3.30 (t,  $J = 6.5$  Hz, 2H), 2.78 (t,  $J = 6.5$  Hz, 2H), 2.38 (s, 6H).  $^{13}\text{C}$  NMR (151 MHz,  $\text{CDCl}_3$ )  $\delta$ /ppm: 198.52, 179.40, 138.78,

136.90, 135.24, 126.12, 33.63, 28.45, 21.35. HRMS (ESI<sup>+</sup>) m/z Calc. 207.1016 [C<sub>12</sub>H<sub>14</sub>O<sub>3</sub>+H]<sup>+</sup>, Found. 207.1017 [M+H]<sup>+</sup>.

**2. Methyl 4-(3,5-dimethylphenyl)-4-oxobutanoate (S51):** Synthesized following previously reported procedure.<sup>1</sup> The reaction was run on 12.0 mmol scale to give 2.41 g (91% yield) of **S51** as a colorless oil. <sup>1</sup>H NMR (600 MHz, CDCl<sub>3</sub>) δ 7.58 (s, 2H), 7.20 (s, 1H), 3.70 (s, 3H), 3.29 (t, *J* = 6.7 Hz, 2H), 2.75 (t, *J* = 6.7 Hz, 2H), 2.36 (s, 6H). <sup>13</sup>C NMR (151 MHz, CDCl<sub>3</sub>) δ 198.59, 173.61, 138.35, 136.73, 134.98, 125.95, 51.94, 33.62, 28.21, 21.34. HRMS (ESI<sup>+</sup>) m/z Calc. 221.1172 [C<sub>13</sub>H<sub>16</sub>O<sub>3</sub>+H]<sup>+</sup>, Found. 221.1174 [M+H]<sup>+</sup>.

**3. Methyl 4-(3,5-dimethylphenyl)pent-4-enoate (S52):** Synthesized following previously reported procedure.<sup>13</sup> The reaction was run on 10.0 mmol scale to give 1.35 g (62% yield) of **S52** as a colorless oil. <sup>1</sup>H NMR (600 MHz, CD<sub>2</sub>Cl<sub>2</sub>) δ 7.06 (s, 2H), 6.96 (s, 1H), 5.32–5.29 (m, 1H), 5.09–5.05 (m, 1H), 3.66 (s, 3H), 2.90–2.79 (m, 2H), 2.56–2.46 (m, 2H), 2.34 (s, 6H). <sup>13</sup>C NMR (151 MHz, CD<sub>2</sub>Cl<sub>2</sub>) δ 174.98, 149.08, 142.27, 139.54, 130.92, 125.64, 113.71, 53.05, 34.72, 32.21, 22.82. HRMS (ESI<sup>+</sup>) m/z Calc. 219.1380 [C<sub>14</sub>H<sub>18</sub>O<sub>2</sub>+H]<sup>+</sup>, Found. 219.1381 [M+H]<sup>+</sup>.

**4. Methyl 4-(3,5-dimethylphenyl)pentanoate (S53):** Synthesized following previously reported procedure.<sup>14</sup> The reaction was run on 5.00 mmol scale to give 0.95 g (86% yield) of **S53** as a colorless oil. <sup>1</sup>H NMR (600 MHz, CD<sub>2</sub>Cl<sub>2</sub>) δ 6.85 (s, 1H), 6.80 (s, 2H), 3.61 (s, 3H), 2.69–2.58 (m, 1H), 2.30 (s, 6H), 2.26–2.12 (m, 2H), 1.95–1.81 (m, 2H), 1.24 (d, *J* = 7.0 Hz, 3H). <sup>13</sup>C NMR (151 MHz, CD<sub>2</sub>Cl<sub>2</sub>) δ 174.58, 147.10, 138.54, 128.42, 125.53, 51.94, 40.01, 33.90, 33.02, 22.79, 21.81. HRMS (ESI<sup>+</sup>) m/z Calc. 221.1536 [C<sub>14</sub>H<sub>20</sub>O<sub>2</sub>+H]<sup>+</sup>, Found. 221.1535 [M+H]<sup>+</sup>.

**5. 5-(3,5-Dimethylphenyl)-2-methylhexan-2-ol (S54):** Synthesized following Procedure A, step 2. The reaction was run on 4.00mmol scale to give 0.68 g (77% yield) of **S54** as a colorless oil. <sup>1</sup>H

NMR (600 MHz, CD<sub>2</sub>Cl<sub>2</sub>) δ 6.82 (s, 1H), 6.80 (s, 2H), 2.61–2.50 (m, 1H), 2.29 (s, 6H), 1.66–1.54 (m, 2H), 1.47–1.39 (m, 1H), 1.31–1.24 (m, 2H), 1.22 (d, *J* = 7.0 Hz, 3H), 1.14 (s, 6H). <sup>13</sup>C NMR (151 MHz, CD<sub>2</sub>Cl<sub>2</sub>) δ 149.38, 139.37, 129.09, 126.48, 72.25, 43.80, 42.04, 34.53, 30.77, 30.70, 24.10, 22.81. HRMS (ESI<sup>+</sup>) *m/z* Calc. 220.1822 [C<sub>15</sub>H<sub>24</sub>O–e]<sup>+</sup>, Found. 220.1822 [M–e]<sup>+</sup>.

**6. 1-(5-Azido-5-methylhexan-2-yl)-3,5-dimethylbenzene (S55):** Synthesized following Procedure A, step 3. The reaction was run on 2.00 mmol scale to give 0.24 g (49% yield) of **S55** as a colorless oil. <sup>1</sup>H NMR (600 MHz, CD<sub>2</sub>Cl<sub>2</sub>) δ 6.85 (s, 1H), 6.81 (s, 2H), 2.57 (h, *J* = 6.9 Hz, 1H), 2.31 (s, 6H), 1.71–1.58 (m, 2H), 1.48 (ddd, *J* = 13.7, 11.9, 5.1 Hz, 1H), 1.33 (ddd, *J* = 13.7, 11.9, 5.1 Hz, 1H), 1.26–1.21 (m, 9H). <sup>13</sup>C NMR (151 MHz, CD<sub>2</sub>Cl<sub>2</sub>) δ 147.62, 138.15, 127.89, 125.10, 62.01, 40.51, 39.95, 32.94, 26.18, 26.06, 22.88, 21.48. HRMS (ESI<sup>+</sup>) *m/z* Calc. 263.2230 [C<sub>15</sub>H<sub>23</sub>N<sub>3</sub>+NH<sub>4</sub>]<sup>+</sup>, Found. 263.2230 [M+NH<sub>4</sub>]<sup>+</sup>.

### 1-(5-Azido-5-methylhexan-2-yl)-3,5-di-tert-butylbenzene (S61)

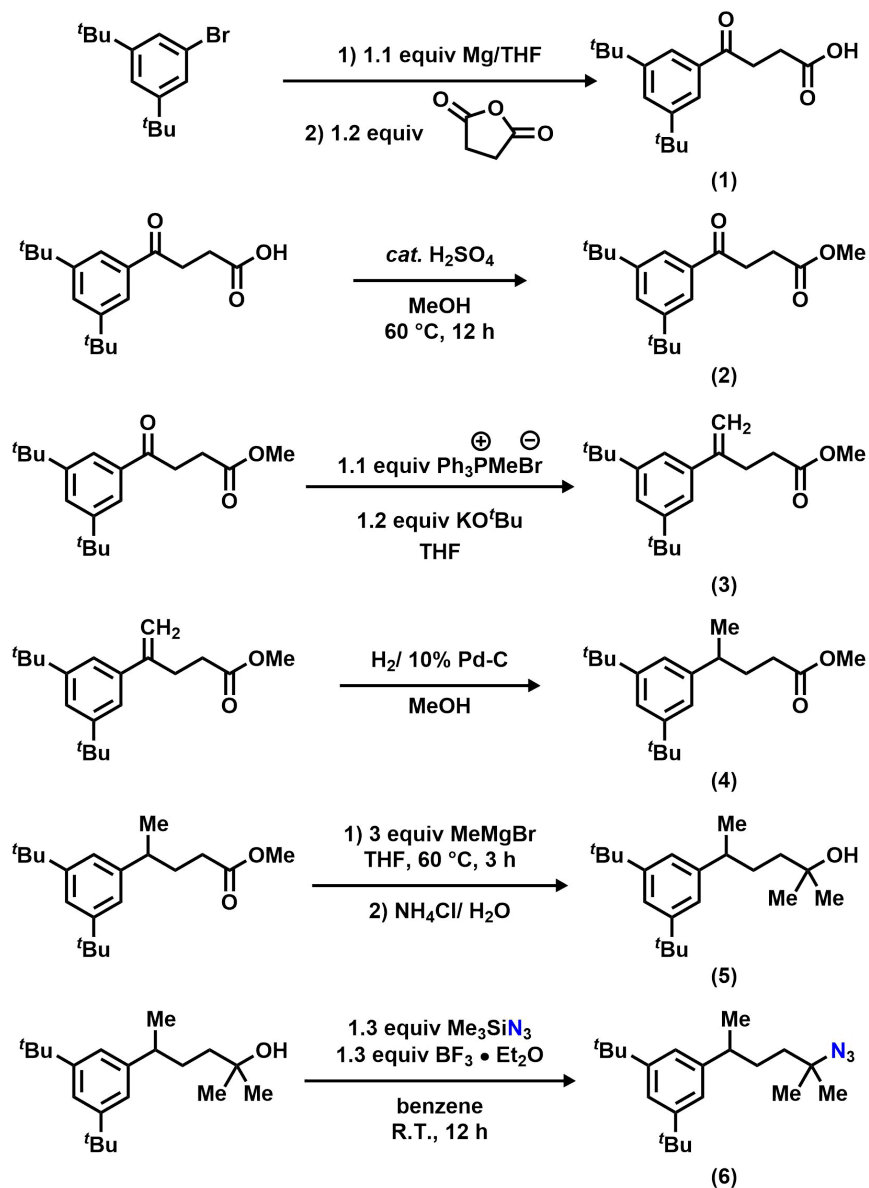

**1. 4-(3,5-Di-tert-butylphenyl)-4-oxobutanoic acid (S56):** Synthesized following previously reported procedure.<sup>12</sup> The reaction was run on 20.0 mmol scale to give 2.44 g (42% yield) of **S56** as a colorless oil. <sup>1</sup>H NMR (600 MHz, CD<sub>2</sub>Cl<sub>2</sub>) δ 7.85 (d, *J* = 1.8 Hz, 2H), 7.71 (t, *J* = 1.8 Hz, 1H), 3.36 (t, *J* = 6.5 Hz, 2H), 2.81 (t, *J* = 6.5 Hz, 2H), 1.38 (s, 18H). <sup>13</sup>C NMR (151 MHz, CD<sub>2</sub>Cl<sub>2</sub>) δ

198.82, 179.53, 151.77, 136.56, 128.03, 122.57, 35.31, 33.73, 31.52, 28.58. HRMS (ESI<sup>+</sup>) *m/z* Calc. 291.1955 [C<sub>18</sub>H<sub>26</sub>O<sub>3</sub>+H]<sup>+</sup>, Found. 291.1955 [M+H]<sup>+</sup>.

**2. Methyl 4-(3,5-di-*tert*-butylphenyl)-4-oxobutanoate (S57):** Synthesized following previously reported procedure.<sup>6</sup> The reaction was run on 8.00 mmol scale to give 2.19 g (90% yield) of **S57** as a colorless oil. <sup>1</sup>H NMR (600 MHz, CD<sub>2</sub>Cl<sub>2</sub>) δ 7.83 (d, *J* = 1.9 Hz, 2H), 7.68 (t, *J* = 1.9 Hz, 1H), 3.67 (s, 3H), 3.32 (t, *J* = 6.6 Hz, 2H), 2.72 (t, *J* = 6.6 Hz, 2H), 1.36 (s, 18H). <sup>13</sup>C NMR (151 MHz, CD<sub>2</sub>Cl<sub>2</sub>) δ 199.25, 174.05, 152.04, 137.06, 128.19, 122.84, 52.31, 35.62, 34.23, 31.84, 28.79. HRMS (ESI<sup>+</sup>) *m/z* Calc. 305.2111 [C<sub>19</sub>H<sub>28</sub>O<sub>3</sub>+H]<sup>+</sup>, Found. 305.2113 [M+H]<sup>+</sup>.

**3. Methyl 4-(3,5-di-*tert*-butylphenyl)pent-4-enoate (S58):** Synthesized following previously reported procedure.<sup>13</sup> The reaction was run on 7.00 mmol scale to give 1.08 g (51% yield) of **S58** as a colorless oil. <sup>1</sup>H NMR (500 MHz, CD<sub>2</sub>Cl<sub>2</sub>) δ 7.38 (t, *J* = 1.8 Hz, 1H), 7.25 (d, *J* = 1.8 Hz, 2H), 5.30–5.25 (m, 2H), 5.07 (d, *J* = 1.3 Hz, 1H), 3.64 (s, 3H), 2.85 (t, *J* = 7.7 Hz, 2H), 2.58–2.38 (m, 2H), 1.35 (s, 18H). <sup>13</sup>C NMR (126 MHz, CD<sub>2</sub>Cl<sub>2</sub>) δ 174.06, 151.44, 148.93, 140.78, 122.50, 121.08, 112.61, 52.10, 35.51, 33.71, 31.98, 31.36. HRMS (ESI<sup>+</sup>) *m/z* Calc. 303.2319 [C<sub>20</sub>H<sub>30</sub>O<sub>2</sub>+H]<sup>+</sup>, Found. 303.2321 [M+H]<sup>+</sup>.

**4. Methyl 4-(3,5-di-*tert*-butylphenyl)pentanoate (S59):** Synthesized following previously reported procedure.<sup>14</sup> The reaction was run on 3.00 mmol scale to give 0.71 g (78% yield) of **S59** as a colorless oil. <sup>1</sup>H NMR (600 MHz, CD<sub>2</sub>Cl<sub>2</sub>) δ 7.35 (t, *J* = 1.7 Hz, 1H), 7.10 (d, *J* = 1.7 Hz, 2H), 3.66 (s, 3H), 2.88–2.70 (m, 1H), 2.39–2.17 (m, 2H), 2.06–1.89 (m, 2H), 1.41 (s, 18H), 1.35 (d, *J* = 7.0 Hz, 3H). <sup>13</sup>C NMR (151 MHz, CD<sub>2</sub>Cl<sub>2</sub>) δ 174.65, 151.50, 146.39, 121.96, 120.94, 51.99, 40.68, 35.57, 34.23, 33.15, 32.18, 22.84. HRMS (ESI<sup>+</sup>) *m/z* Calc. 305.2475 [C<sub>20</sub>H<sub>32</sub>O<sub>2</sub>+H]<sup>+</sup>, Found. 305.2476 [M+H]<sup>+</sup>.

**5. 5-(3,5-di-tert-butylphenyl)-2-methylhexan-2-ol (S60):** Synthesized following Procedure A, step 2. The reaction was run on 2.00 mmol scale to give 0.54 g (88% yield) of **S60** as a colorless oil.  $^1\text{H}$  NMR (600 MHz,  $\text{CD}_2\text{Cl}_2$ )  $\delta$  7.34 (t,  $J = 1.8$  Hz, 1H), 7.12 (d,  $J = 1.8$  Hz, 2H), 2.80–2.62 (m, 1H), 1.81–1.65 (m, 2H), 1.61–1.48 (m, 2H), 1.41 (s, 18H), 1.34 (d,  $J = 7.0$  Hz, 3H), 1.23 (s, 3H), 1.23 (s, 3H).  $^{13}\text{C}$  NMR (151 MHz,  $\text{CD}_2\text{Cl}_2$ )  $\delta$  151.36, 147.67, 121.91, 120.59, 71.40, 42.97, 41.70, 35.56, 33.73, 32.20, 30.00, 29.76, 23.39. HRMS (ESI $^+$ )  $m/z$  Calc. 304.2761 [ $\text{C}_{21}\text{H}_{36}\text{O}-\text{e}$ ] $^+$ , Found. 304.2759 [ $\text{M}-\text{e}$ ] $^+$ .

**6. 1-(5-Azido-5-methylhexan-2-yl)-3,5-di-tert-butylbenzene (S61):** Synthesized following Procedure A, step 3. The reaction was run on 1.50 mmol scale to give 0.26 g (52% yield) of **S61** as a colorless oil.  $^1\text{H}$  NMR (500 MHz,  $\text{CD}_2\text{Cl}_2$ )  $\delta$  7.36 (t,  $J = 1.8$  Hz, 1H), 7.13 (d,  $J = 1.8$  Hz, 2H), 2.77–2.69 (m, 1H), 1.84–1.68 (m, 2H), 1.65–1.54 (m, 1H), 1.42 (s, 19H), 1.35 (d,  $J = 6.9$  Hz, 3H), 1.31 (s, 6H).  $^{13}\text{C}$  NMR (126 MHz,  $\text{CD}_2\text{Cl}_2$ )  $\delta$  151.14, 146.88, 121.57, 120.43, 62.06, 41.19, 40.07, 35.27, 33.12, 31.88, 26.36, 26.19, 23.21. HRMS (ESI $^+$ )  $m/z$  Calc. 347.3169 [ $\text{C}_{21}\text{H}_{35}\text{N}_3+\text{NH}_4$ ] $^+$ , Found. 347.3170 [ $\text{M}+\text{NH}_4$ ] $^+$ .

## Procedure for Catalytic C–H Amination

### Pyrrolidine preparation:

In a shell vial, organoazide substrate (0.10 mmol, 1 equiv) was dissolved in 0.3 ml of C<sub>6</sub>D<sub>6</sub> and transferred to an NMR tube. In a separated shell vial, catalyst (<sup>TrF</sup>BOX)Ni(py) (**4F**) (5 mol% unless otherwise specified) was dissolved in 0.3 ml of C<sub>6</sub>D<sub>6</sub> and also transferred to the NMR tube. The NMR tube was capped, taped and taken out of the glovebox to react at specified temperature. The reaction progress was monitored by <sup>1</sup>H NMR spectroscopy and the fate of the catalyst was determined by <sup>19</sup>F NMR spectroscopy. After either complete consumption of the organoazide or decomposition of the catalyst, the mixture was poured into a vial containing 3 ml of diethyl ether. The mixture was extracted three times with 0.1 M HCl aqueous solution (3×10 ml). To the combined aqueous layer, 1.0 M NaOH aqueous solution was added dropwise until a pH = 14 was reached. The cloudy solution was then extracted three times with DCM (3×10 ml). The combined organic phase was dried with MgSO<sub>4</sub>, filtered and concentrated to yield the corresponding substituted pyrrolidine. Racemic substituted pyrrolidines were prepared in a similar fashion using previously published dipyrinato monovalent nickel catalyst (<sup>AdF</sup>L)Ni(py).

### Enantiomeric excess (ee) measurement:<sup>15-17</sup>

**Procedure A:** In separate shell vials, the following stock solutions were prepared:

A: 1 ml of a 0.02 M stock solution of the pyrrolidine in CDCl<sub>3</sub>.

B: 1 ml of a 0.04 M stock solution of (S)-(+)- $\alpha$ -methoxy- $\alpha$ -(trifluoromethyl)phenylacetyl chloride (Mosher's acid chloride) in CDCl<sub>3</sub>.

C: 1 ml of a 0.08 M stock solution of triethylamine (NEt<sub>3</sub>) in CDCl<sub>3</sub>.

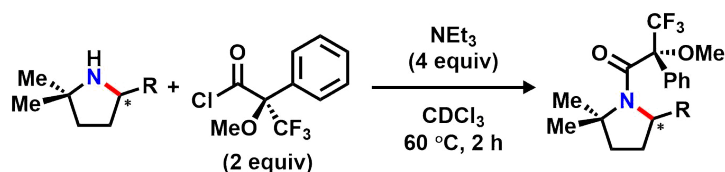

To an NMR tube was added 0.3 ml of each stock solution A, B and C. The NMR tube was capped, taped, and heated to 60 °C. The reaction was monitored by  $^1\text{H}$  NMR spectroscopy until all pyrrolidine was consumed (ca. 2 h), and the final  $^1\text{H}$  and  $^{19}\text{F}$  NMR spectra were used for *ee* calculation. The same procedure was repeated with racemic sample.

### Procedure B:

Due to the extra steric shielding of 2,2,5,5-tetra-substituted pyrrolidines (**27**, **29**, **31**, **33**), the *ee* of these compounds were determined by chiral gas chromatography (GC). Such analysis is hindered for 2,2,5-tri-substituted pyrrolidines due to trailing.

Pyrrolidine **10** does not condense with Mosher's acid chloride under standard condition, possibly due to the additional steric hindrance. Therefore, the *ee* of **10** was determined by chiral GC after condensed with acidic anhydride using similar conditions.

### Absolute configuration determination:

The absolute configuration of the chiral centers was determined by Mosher's method.<sup>16-17</sup> Similar 2,2,5-trisubstituted pyrrolidines have the Mosher amide in predominant configuration  $A_R/S$ , leaving the proton *cis* to phenyl group ( $A_S$ ) shifted upfield due to shielding of the  $\pi$ -system.<sup>18-19</sup>

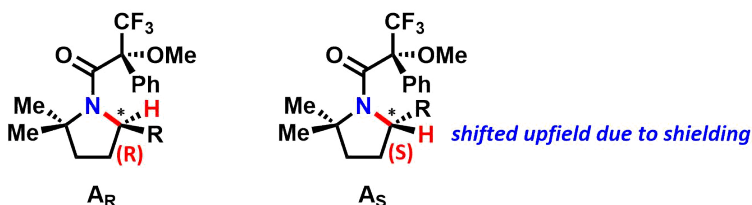



## Characterization of Substituted Pyrrolidine

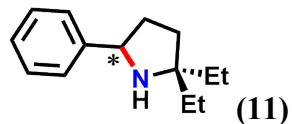

Yield: 10.0 mg, 49%. Procedure A, *ee* = 5%  $^1\text{H}$  NMR (600 MHz,  $\text{CD}_2\text{Cl}_2$ )  $\delta$  7.41 (d,  $J$  = 7.3 Hz, 2H), 7.32–7.27 (m, 2H), 7.21 (tt,  $J$  = 6.9, 1.3 Hz, 1H), 4.28–4.22 (m, 1H), 2.19–2.08 (m, 1H), 1.78–1.61 (m, 3H), 1.61–1.41 (m, 5H), 0.94 (t,  $J$  = 7.4 Hz, 3H), 0.90 (t,  $J$  = 7.5 Hz, 3H).  $^{13}\text{C}$  NMR (151 MHz,  $\text{CD}_2\text{Cl}_2$ )  $\delta$  146.36, 128.45, 126.94, 126.86, 64.39, 62.11, 36.35, 35.84, 32.66, 31.98, 9.07, 9.03. HRMS (ESI $^+$ )  $m/z$  Calc. 204.1747 [ $\text{C}_{14}\text{H}_{21}\text{N}+\text{H}$ ] $^+$ , Found. 204.1747 [ $\text{M}+\text{H}$ ] $^+$ .

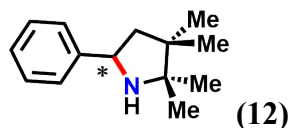

Yield: 5.9 mg, 29%. Procedure B, *ee* = 0 %. (50 mol% catalyst loading)  $^1\text{H}$  NMR (600 MHz,  $\text{CD}_2\text{Cl}_2$ )  $\delta$  7.43–7.38 (m, 2H), 7.31–7.26 (m, 2H), 7.19–7.14 (m, 1H), 4.37 (t,  $J$  = 8.5 Hz, 1H), 2.11 (dd,  $J$  = 12.8, 8.6 Hz, 1H), 1.77 (s, 1H), 1.72 (dd,  $J$  = 12.8, 8.6 Hz, 1H), 1.11 (s, 3H), 1.10 (s, 3H), 1.02 (s, 3H), 0.99 (s, 3H).  $^{13}\text{C}$  NMR (126 MHz,  $\text{CD}_2\text{Cl}_2$ )  $\delta$  147.23, 127.76, 126.10, 125.75, 62.46, 57.50, 49.36, 43.24, 26.42, 24.27, 23.90. HRMS (ESI $^+$ )  $m/z$  Calc. 204.1747 [ $\text{C}_{14}\text{H}_{21}\text{N}+\text{H}$ ] $^+$ , Found. 204.1748 [ $\text{M}+\text{H}$ ] $^+$ .

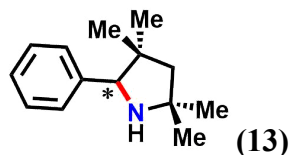

Yield: 7.5 mg, 37%. Procedure A, *ee* = 6%  $^1\text{H}$  NMR (600 MHz,  $\text{CD}_2\text{Cl}_2$ )  $\delta$  7.41–7.35 (m, 2H), 7.34–7.27 (m, 2H), 7.27–7.21 (m, 1H), 4.08 (s, 1H), 1.75–1.56 (m, 3H), 1.31 (s, 3H), 1.26 (s, 3H), 1.05 (s, 3H), 0.67 (s, 3H).  $^{13}\text{C}$  NMR (151 MHz,  $\text{CD}_2\text{Cl}_2$ )  $\delta$  141.46, 128.03, 127.90, 127.03, 70.85,

55.44, 55.18, 43.07, 32.34, 31.44, 27.83, 24.56. HRMS (ESI<sup>+</sup>) m/z Calc. 204.1747 [C<sub>14</sub>H<sub>21</sub>N+H]<sup>+</sup>, Found. 204.1749 [M+H]<sup>+</sup>.

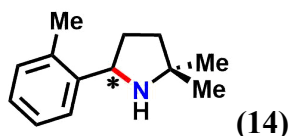

Yield: 14.0 mg, 74%. Procedure A, *ee* = 2% <sup>1</sup>H NMR (600 MHz, CD<sub>2</sub>Cl<sub>2</sub>) δ 7.62 (d, *J* = 7.6 Hz, 1H), 7.19–7.13 (m, 1H), 7.12–7.03 (m, 2H), 4.53 (t, *J* = 7.7 Hz, 1H), 2.34 (s, 3H), 2.32–2.18 (m, 1H), 1.79–1.53 (m, 3H), 1.43 (s, 1H), 1.28 (s, 3H), 1.25 (s, 3H). <sup>13</sup>C NMR (151 MHz, CD<sub>2</sub>Cl<sub>2</sub>) δ 144.50, 135.64, 130.27, 126.39, 126.20, 125.69, 58.93, 58.19, 40.04, 34.04, 30.86, 29.58, 19.50. HRMS (ESI<sup>+</sup>) m/z Calc. 190.1590 [C<sub>13</sub>H<sub>19</sub>N+H]<sup>+</sup>, Found. 190.1590 [M+H]<sup>+</sup>.

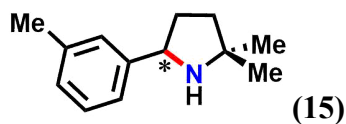

Yield: 14.9 mg, 79%. Procedure A, *ee* = 38% <sup>1</sup>H NMR (600 MHz, CD<sub>2</sub>Cl<sub>2</sub>) δ 7.21–7.12 (m, 3H), 7.10–6.99 (m, 1H), 4.34–4.20 (m, 1H), 2.34 (s, 3H), 2.29–2.15 (m, 1H), 1.82–1.56 (m, 4H), 1.27 (s, 3H), 1.24 (s, 3H). <sup>13</sup>C NMR (151 MHz, CD<sub>2</sub>Cl<sub>2</sub>) δ 148.04, 140.14, 130.37, 129.61, 129.58, 125.93, 64.18, 61.30, 42.32, 37.63, 32.84, 31.64, 23.56. HRMS (ESI<sup>+</sup>) m/z Calc. 190.1590 [C<sub>13</sub>H<sub>19</sub>N+H]<sup>+</sup>, Found. 190.1591 [M+H]<sup>+</sup>.

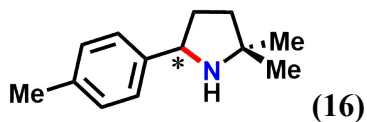

Yield: 16.4 mg, 87%. Procedure A, *ee* = 27% <sup>1</sup>H NMR (600 MHz, CD<sub>2</sub>Cl<sub>2</sub>) δ 7.26 (d, *J* = 7.4 Hz, 2H), 7.11 (d, *J* = 7.5 Hz, 2H), 4.26 (t, *J* = 7.0 Hz, 1H), 2.32 (s, 3H), 2.26–2.11 (m, 1H), 1.84–1.60 (m, 3H), 1.51 (s, 1H), 1.25 (s, 3H), 1.23 (s, 3H). <sup>13</sup>C NMR (151 MHz, CD<sub>2</sub>Cl<sub>2</sub>) δ 145.43, 138.68,

131.39, 129.02, 64.20, 61.44, 42.61, 38.01, 33.16, 31.95, 23.36. HRMS (ESI<sup>+</sup>) *m/z* Calc. 190.1590 [C<sub>13</sub>H<sub>19</sub>N+H]<sup>+</sup>, Found. 190.1592 [M+H]<sup>+</sup>.

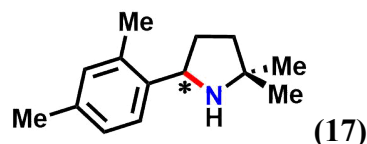

Yield: 10.8 mg, 53%. Procedure A, *ee* = 30% <sup>1</sup>H NMR (600 MHz, CD<sub>2</sub>Cl<sub>2</sub>) δ 7.45 (d, *J* = 7.9 Hz, 1H), 6.97 (d, *J* = 7.9 Hz, 1H), 6.93 (s, 1H), 4.48 (t, *J* = 7.7 Hz, 1H), 2.30 (s, 3H), 2.27 (s, 3H), 2.26–2.18 (m, 1H), 1.77–1.44 (m, 4H), 1.27 (s, 3H), 1.24 (s, 3H). <sup>13</sup>C NMR (126 MHz, CD<sub>2</sub>Cl<sub>2</sub>) δ 140.55, 135.20, 134.81, 130.42, 126.16, 124.94, 58.24, 57.40, 39.44, 33.46, 30.17, 28.91, 20.29, 18.73. HRMS (ESI<sup>+</sup>) *m/z* Calc. 204.1747 [C<sub>14</sub>H<sub>21</sub>N+H]<sup>+</sup>, Found. 204.1749 [M+H]<sup>+</sup>.

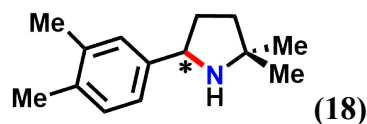

Yield: 15.2 mg, 75%. Procedure A, *ee* = 21% <sup>1</sup>H NMR (500 MHz, CD<sub>2</sub>Cl<sub>2</sub>) δ 7.14 (s, 1H), 7.11–7.03 (m, 2H), 4.30–4.16 (m, 1H), 2.26 (s, 3H), 2.24 (s, 3H), 2.22–2.12 (m, 1H), 1.78–1.65 (m, 3H), 1.55 (s, 1H), 1.26 (s, 3H), 1.23 (s, 3H). <sup>13</sup>C NMR (126 MHz, CD<sub>2</sub>Cl<sub>2</sub>) δ 143.45, 136.66, 135.09, 129.66, 128.14, 124.22, 62.02, 59.23, 40.39, 35.70, 30.88, 29.69, 19.92, 19.46. HRMS (ESI<sup>+</sup>) *m/z* Calc. 204.1747 [C<sub>14</sub>H<sub>21</sub>N+H]<sup>+</sup>, Found. 204.1749 [M+H]<sup>+</sup>.

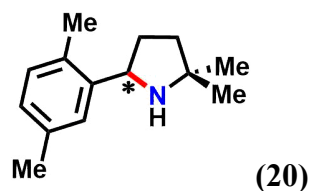

Yield: 12.6 mg, 62%. Procedure A, *ee* = 23% <sup>1</sup>H NMR (500 MHz, CD<sub>2</sub>Cl<sub>2</sub>) δ 7.42 (s, 1H), 6.99 (d, *J* = 7.6 Hz, 1H), 6.96–6.83 (m, 1H), 4.50 (t, *J* = 7.7 Hz, 1H), 2.31 (s, 3H), 2.30 (s, 3H), 2.29–

2.22 (m, 1H), 1.80–1.48 (m, 4H), 1.30 (s, 3H), 1.26 (s, 3H).  $^{13}\text{C}$  NMR (126 MHz,  $\text{CD}_2\text{Cl}_2$ )  $\delta$  143.89, 135.59, 132.48, 130.21, 127.06, 126.32, 58.97, 58.18, 40.03, 34.01, 30.78, 29.51, 21.31, 19.04. HRMS ( $\text{ESI}^+$ )  $m/z$  Calc. 204.1747 [ $\text{C}_{14}\text{H}_{21}\text{N}+\text{H}$ ] $^+$ , Found. 204.1748 [ $\text{M}+\text{H}$ ] $^+$ .

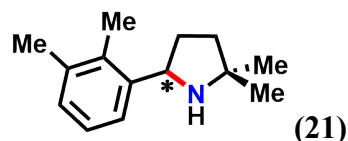

Yield: 13.9 mg, 68%. Procedure A,  $ee = 1\%$   $^1\text{H}$  NMR (600 MHz,  $\text{CD}_2\text{Cl}_2$ )  $\delta$  7.49 (d,  $J = 7.7$  Hz, 1H), 7.06 (t,  $J = 7.6$  Hz, 1H), 7.01 (d,  $J = 7.3$  Hz, 1H), 4.58 (t,  $J = 7.7$  Hz, 1H), 2.31–2.26 (m, 4H), 2.25 (s, 3H), 1.77–1.59 (m, 3H), 1.55 (s, 1H), 1.29 (s, 3H), 1.27 (s, 3H).  $^{13}\text{C}$  NMR (151 MHz,  $\text{CD}_2\text{Cl}_2$ )  $\delta$  144.01, 136.87, 134.30, 128.18, 125.63, 123.49, 59.01, 58.59, 40.03, 34.14, 30.83, 29.61, 20.79, 14.94. HRMS ( $\text{ESI}^+$ )  $m/z$  Calc. 204.1747 [ $\text{C}_{14}\text{H}_{21}\text{N}+\text{H}$ ] $^+$ , Found. 204.1749 [ $\text{M}+\text{H}$ ] $^+$ .

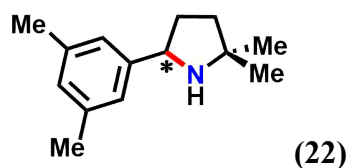

Yield: 16.5 mg, 81%. Procedure A,  $ee = 53\%$   $^1\text{H}$  NMR (600 MHz,  $\text{CD}_2\text{Cl}_2$ )  $\delta$  6.98 (s, 2H), 6.86 (s, 1H), 4.29–4.19 (m, 1H), 2.30 (s, 6H), 2.24–2.12 (m, 1H), 1.79–1.64 (m, 3H), 1.56 (s, 1H), 1.26 (s, 3H), 1.23 (s, 3H).  $^{13}\text{C}$  NMR (126 MHz,  $\text{CD}_2\text{Cl}_2$ )  $\delta$  145.97, 138.00, 128.45, 124.68, 62.22, 59.26, 40.38, 35.64, 30.88, 29.68, 21.45. HRMS ( $\text{ESI}^+$ )  $m/z$  Calc. 204.1747 [ $\text{C}_{14}\text{H}_{21}\text{N}+\text{H}$ ] $^+$ , Found. 204.1748 [ $\text{M}+\text{H}$ ] $^+$ .

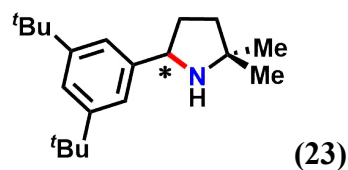

Yield: 22.1 mg, 77%. Procedure A, *ee* = 73% <sup>1</sup>H NMR (600 MHz, CD<sub>2</sub>Cl<sub>2</sub>) δ 7.29 (t, *J* = 1.8 Hz, 1H), 7.22 (d, *J* = 1.8 Hz, 2H), 4.32–4.27 (m, 1H), 2.27–2.19 (m, 1H), 1.83–1.64 (m, 4H), 1.33 (s, 18H), 1.28 (s, 3H), 1.24 (s, 3H). <sup>13</sup>C NMR (126 MHz, CD<sub>2</sub>Cl<sub>2</sub>) δ 150.52, 144.70, 120.69, 120.59, 62.50, 58.96, 40.07, 35.29, 34.71, 31.24, 30.40, 29.30. HRMS (ESI<sup>+</sup>) *m/z* Calc. 288.2686 [C<sub>20</sub>H<sub>33</sub>N+H]<sup>+</sup>, Found. 288.2688 [M+H]<sup>+</sup>.

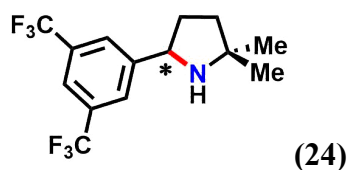

Yield: 24.8 mg, 80%. Procedure A, *ee* = 67% Spectral features match previously published result.<sup>1</sup>

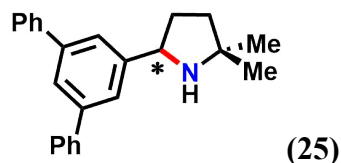

Yield: 13.5 mg, 41%. Procedure A, *ee* = 24% <sup>1</sup>H NMR (500 MHz, CD<sub>2</sub>Cl<sub>2</sub>) δ 7.71–7.66 (m, 5H), 7.66–7.62 (m, 2H), 7.51–7.43 (m, 4H), 7.41–7.34 (m, 2H), 4.50 (t, *J* = 7.8 Hz, 1H), 2.43 – 2.25 (m, 1H), 1.99–1.64 (m, 2H), 1.30 (s, 3H), 1.29 (s, 3H). <sup>13</sup>C NMR (126 MHz, CD<sub>2</sub>Cl<sub>2</sub>) δ 147.28, 141.97, 141.72, 129.15, 127.73, 127.61, 124.95, 124.71, 62.22, 59.66, 40.27, 35.62, 30.77, 29.57. HRMS (ESI<sup>+</sup>) *m/z* Calc. 328.2060 [C<sub>24</sub>H<sub>25</sub>N+H]<sup>+</sup>, Found. 328.2061 [M+H]<sup>+</sup>.

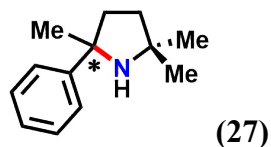

Yield: 9.4 mg, 50%. (20 mol% catalyst loading) Procedure B, *ee* = 53% Spectral features match previously published result.

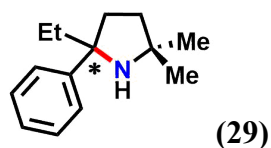

Yield: 15.8 mg, 78%. (20 mol% catalyst loading) Procedure B,  $ee = 76\%$   $^1\text{H}$  NMR (600 MHz,  $\text{CD}_2\text{Cl}_2$ )  $\delta$  7.56–7.43 (m, 2H), 7.36–7.23 (m, 2H), 7.22–7.11 (m, 1H), 2.28–2.16 (m, 1H), 2.14–2.04 (m, 1H), 1.82–1.73 (m, 1H), 1.73–1.45 (m, 4H), 1.27 (s, 3H), 1.03 (s, 3H), 0.66 (t,  $J = 7.4$  Hz, 3H).  $^{13}\text{C}$  NMR (151 MHz,  $\text{CD}_2\text{Cl}_2$ )  $\delta$  150.13, 127.85, 126.91, 125.85, 69.30, 59.67, 40.03, 39.25, 38.11, 31.21, 30.57, 9.38. HRMS (ESI<sup>+</sup>)  $m/z$  Calc. 204.1747 [ $\text{C}_{14}\text{H}_{21}\text{N}+\text{H}$ ]<sup>+</sup>, Found. 204.1748 [ $\text{M}+\text{H}$ ]<sup>+</sup>.

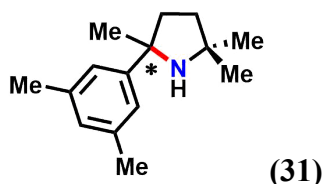

Yield: 11.7 mg, 54%. (20 mol% catalyst loading) Procedure B,  $ee = 79\%$   $^1\text{H}$  NMR (600 MHz,  $\text{CD}_2\text{Cl}_2$ )  $\delta$  7.15 (s, 2H), 6.82 (s, 1H), 2.30 (s, 6H), 2.23–2.09 (m, 1H), 2.10–1.97 (m, 1H), 1.76–1.67 (m, 1H), 1.67–1.55 (m, 1H), 1.38 (s, 3H), 1.27 (s, 3H), 1.06 (s, 3H).  $^{13}\text{C}$  NMR (151 MHz,  $\text{CD}_2\text{Cl}_2$ )  $\delta$  154.22, 139.70, 129.74, 126.07, 67.94, 62.04, 43.03, 42.42, 35.51, 33.74, 32.86, 23.83. HRMS (ESI<sup>+</sup>)  $m/z$  Calc. 218.1903 [ $\text{C}_{15}\text{H}_{23}\text{N}+\text{H}$ ]<sup>+</sup>, Found. 218.1904 [ $\text{M}+\text{H}$ ]<sup>+</sup>.

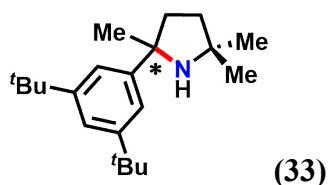

Yield: 18.6 mg, 62%. (20 mol% catalyst loading) Procedure B,  $ee = 64\%$   $^1\text{H}$  NMR (600 MHz,  $\text{CD}_2\text{Cl}_2$ )  $\delta$  7.43 (d,  $J = 1.8$  Hz, 2H), 7.25 (t,  $J = 1.8$  Hz, 1H), 2.23–2.13 (m, 1H), 2.13–2.03 (m, 1H), 1.78–1.66 (m, 1H), 1.66–1.54 (m, 1H), 1.43 (s, 4H), 1.33 (s, 18H), 1.29 (s, 3H), 1.10 (s, 3H).  $^{13}\text{C}$

NMR (126 MHz, CD<sub>2</sub>Cl<sub>2</sub>) δ 151.00, 150.31, 120.38, 119.91, 66.35, 59.88, 41.34, 40.26, 35.24, 33.19, 31.75, 31.56, 30.74. HRMS (ESI<sup>+</sup>) m/z Calc. 302.2842 [C<sub>21</sub>H<sub>35</sub>N+H]<sup>+</sup>, Found. 302.2843 [M+H]<sup>+</sup>.

## Experimental Details for Mechanistic Studies

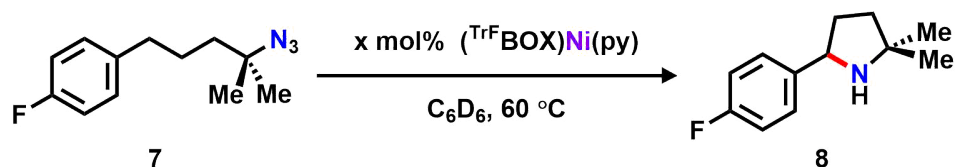

*Stock solution A:* substrate **7** (50.0 mg, 0.226 mmol) and internal standard trifluorotoluene (9.0  $\mu\text{L}$ , 0.073 mmol) were dissolved in 5.0 mL of  $\text{C}_6\text{D}_6$ .

*Stock solution B:* catalyst  $(\text{TrFBOX})\text{Ni}(\text{py})$  (20.0 mg, 0.021 mmol) was dissolved in 2.0 mL of  $\text{C}_6\text{D}_6$ .

1. *Reaction order on substrate concentration:* To a J-Young tube, 0.10 mL of stock solution B was added using a 1 mL microsyringe. The solution was frozen in a cold well cooled using liquid nitrogen before the appropriate amount of  $\text{C}_6\text{D}_6$  was carefully layered followed by 0.10, 0.20, 0.30, and 0.40 mL of stock solution A to bring the total volume to 0.50 mL. The sample was thawed, quickly shaken and immediately inserted into an NMR spectrometer preset to take 120 spectra with 50-second time interval at  $60\text{ }^\circ\text{C}$ . The rate for the first 10% conversion was plotted against the initial substrate concentrations. The measurement was repeated three times, and the standard deviations were used as error bars.

*Stock solution C:* substrate **7** (80.0 mg, 0.362 mmol) and internal standard trifluorotoluene (14.0  $\mu\text{L}$ , 0.114 mmol) were dissolved in 2.0 mL of  $\text{C}_6\text{D}_6$ .

*Stock solution D:* catalyst  $(\text{TrFBOX})\text{Ni}(\text{py})$  (40.0 mg, 0.042 mmol) was dissolved in 4.0 mL of  $\text{C}_6\text{D}_6$ .

2. *Reaction order on catalyst concentration:* To a J-Young tube, 0.10 mL of stock solution C was added using a 1 mL microsyringe. The solution was frozen in a cold well cooled using liquid



nitrogen before the appropriate amount of C<sub>6</sub>D<sub>6</sub> was carefully layered followed by 50.0, 75.0, 100.0, 125.0, and 150.0 μL of stock solution D to bring the total volume to 0.50 mL. The sample was thawed, quickly shaken and immediately inserted into an NMR spectrometer preset to take 120 spectra with 50-second time interval at 60 °C. The rate for the first 10% conversion was plotted against the initial catalyst concentrations. The measurement was repeated three times, and the standard deviations were used as error bars.

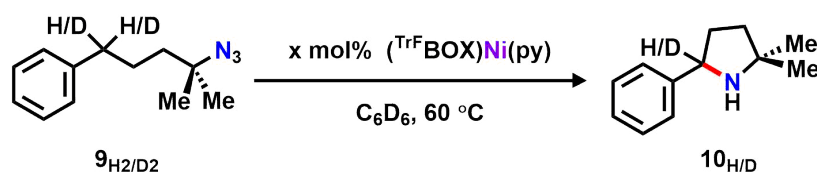

*Stock solution E*: substrate **9**<sub>H<sub>2</sub></sub> (37.0 mg, 0.182 mmol) and internal standard trifluorotoluene (7 μL, 0.057 mmol) were dissolved in 1.0 mL of C<sub>6</sub>D<sub>6</sub>.

*Stock solution F*: substrate **9**<sub>D<sub>2</sub></sub> (37.0 mg, 0.182 mmol) and internal standard trifluorotoluene (7 μL, 0.057 mmol) were dissolved in 1.0 mL of C<sub>6</sub>D<sub>6</sub>.

3. *Intermolecular KIE*: To a J-Young tube, 0.10 mL of stock solution E or F was added using a 1 mL microsyringe. The solution was frozen in a cold well cooled using liquid nitrogen before 0.10 mL of C<sub>6</sub>D<sub>6</sub> was carefully layered followed by 0.30 mL of stock solution D to bring the total volume to 0.50 mL. The sample was thawed, quickly shaken and immediately inserted into an NMR spectrometer preset to take 120 spectra with 45- (for E) or 250-second time interval at 60 °C. The first 10% conversion was plotted against time, and the ratio between slopes of the resulting curves for E and F was calculated as the KIE. The measurement was repeated three times, and the standard deviations were used as error bars.

**Table S1. Optimization of Amination Conditions**

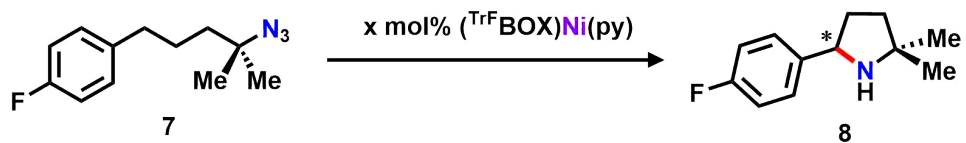

|   | Cat. Loading (mol%) <sup>a</sup> | Solvent                       | Time (h) | Temp. (°C) | Yield (%) <sup>b</sup> | ee (%) <sup>c</sup> |
|---|----------------------------------|-------------------------------|----------|------------|------------------------|---------------------|
| 1 | 10                               | C <sub>6</sub> D <sub>6</sub> | 12       | 60         | 85                     | 28                  |
| 2 | 5                                | C <sub>6</sub> D <sub>6</sub> | 24       | 60         | 85                     | 28                  |
| 3 | 5                                | C <sub>6</sub> D <sub>6</sub> | 12       | 80         | 73                     | 22                  |
| 4 | 5                                | C <sub>6</sub> D <sub>6</sub> | 72       | 40         | 42                     | 35                  |
| 5 | 1                                | C <sub>6</sub> D <sub>6</sub> | 168      | 60         | 36                     | 28                  |
| 6 | 5                                | d <sub>8</sub> -toluene       | 24       | 60         | 78                     | 28                  |
| 7 | 5                                | d <sub>8</sub> -THF           | 15       | 60         | 88                     | 28                  |

<sup>a</sup>Hexanes and ether are not suitable due to low solubility; DCM reacts with catalyst to generate LNi<sup>II</sup>Cl; <sup>b</sup>Isolation yield; <sup>c</sup>Determined by Mosher analysis.

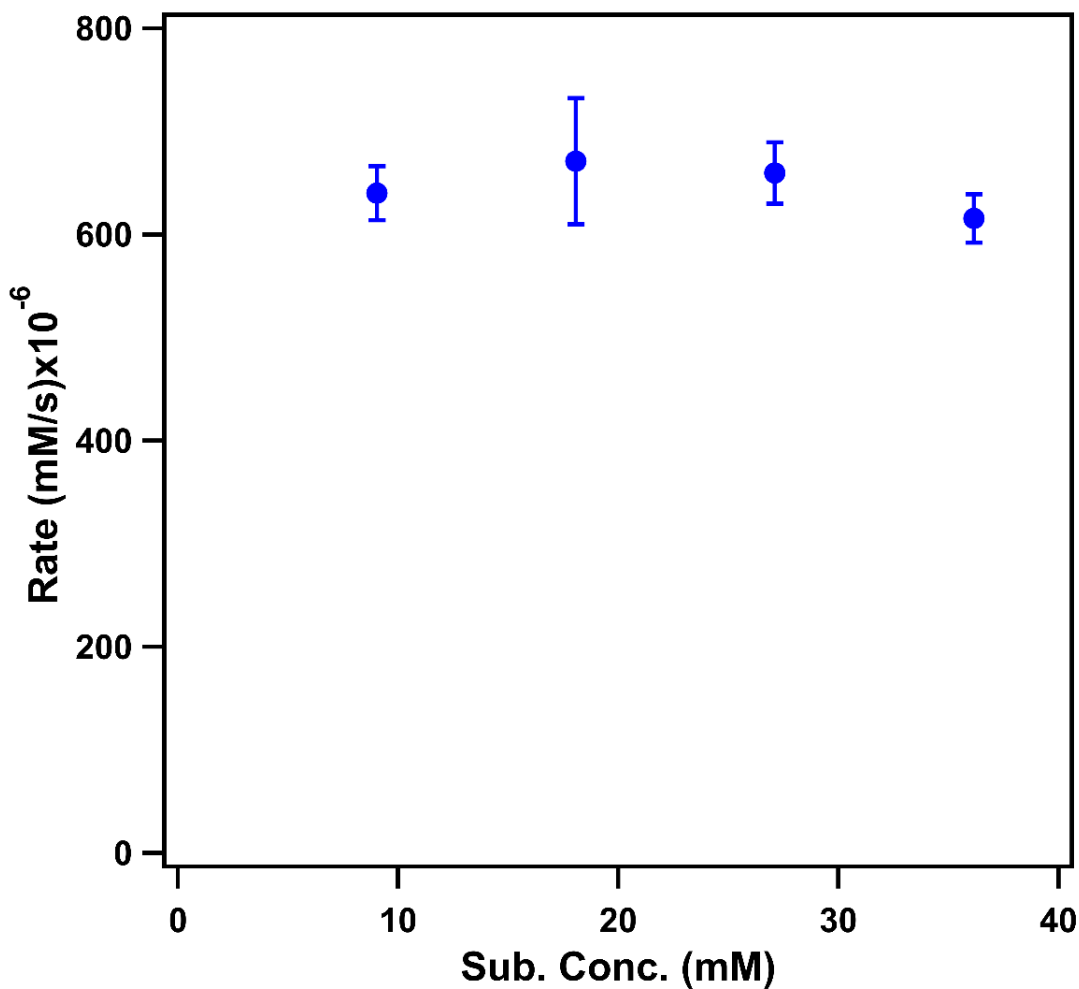

|   | Substrate Concentration (mM) | Initial Rate ( $\times 10^{-4}$ mM/s) |
|---|------------------------------|---------------------------------------|
| 1 | 9.0                          | $6.4 \pm 0.3$                         |
| 2 | 18                           | $6.7 \pm 0.6$                         |
| 3 | 27                           | $6.6 \pm 0.3$                         |
| 4 | 36                           | $6.2 \pm 0.4$                         |

**Figure S1. Plot of initial rate vs. substrate concentrations.** Initial rate for the first 10% conversion of **7** into **8** as a function of initial substrate **7** concentration while holding catalyst concentration constant at 2.1 mM. Every measurement is done in triplicate, and error bars represent standard deviations. ( $k = 18.2 \pm 0.7 \times 10^{-3} \text{ min}^{-1}$ )

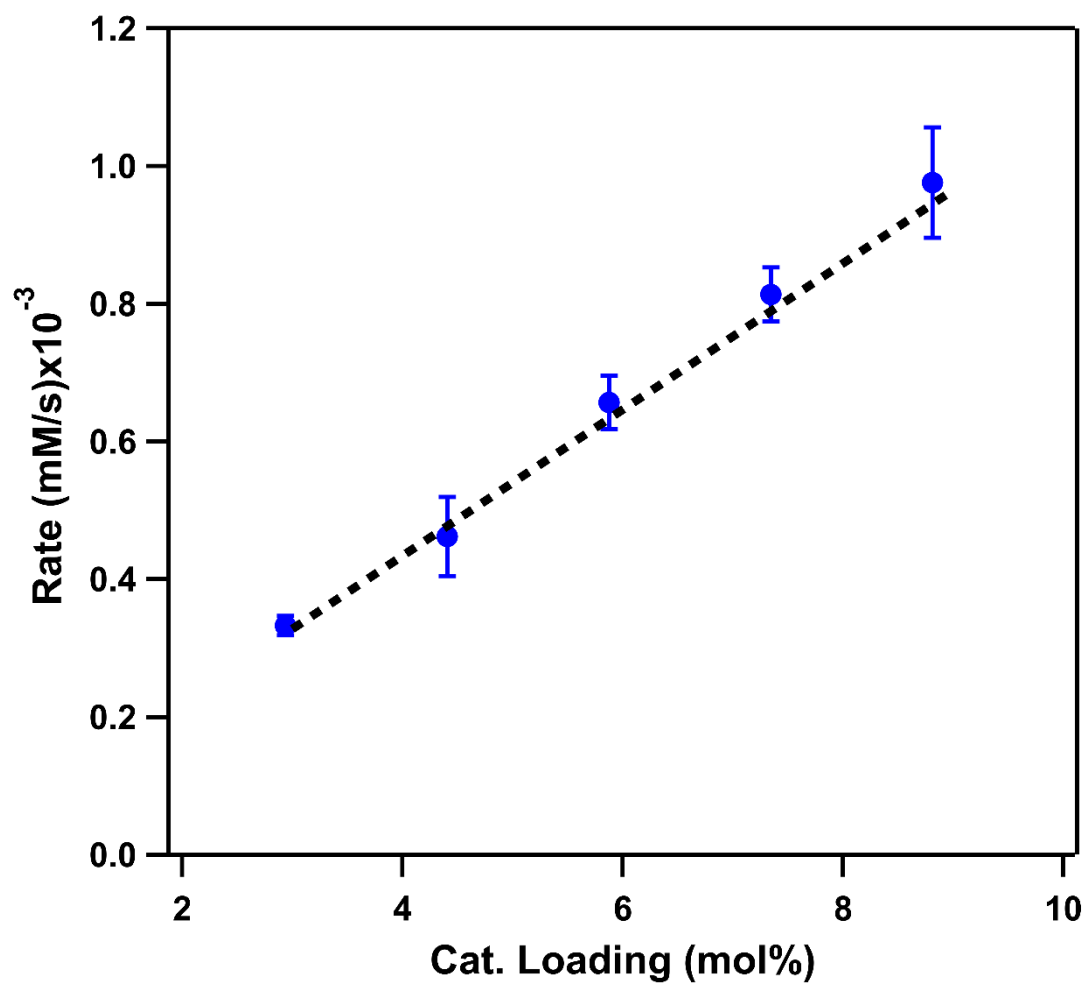

|   | Catalyst Concentration (mM) | Catalyst Loadings (mol%) | Initial Rate ( $\times 10^{-4}$ mM/s) |
|---|-----------------------------|--------------------------|---------------------------------------|
| 1 | 1.1                         | 2.9                      | $3.3 \pm 0.2$                         |
| 2 | 1.6                         | 4.4                      | $4.6 \pm 0.5$                         |
| 3 | 2.1                         | 5.9                      | $6.6 \pm 0.6$                         |
| 4 | 2.7                         | 7.3                      | $8.1 \pm 0.3$                         |
| 5 | 3.2                         | 8.8                      | $9.8 \pm 0.6$                         |

**Figure S2. Plot of initial rate vs. catalyst loadings.** Initial rate for the first 10% conversion of **7** into **8** as a function of catalyst loadings while holding initial substrate **7** concentration constant at 36.1 mM. Every measurement is done in triplicate, and error bars represent standard deviations. ( $k = 18.6 \pm 0.6 \times 10^{-3} \text{ min}^{-1}$ )

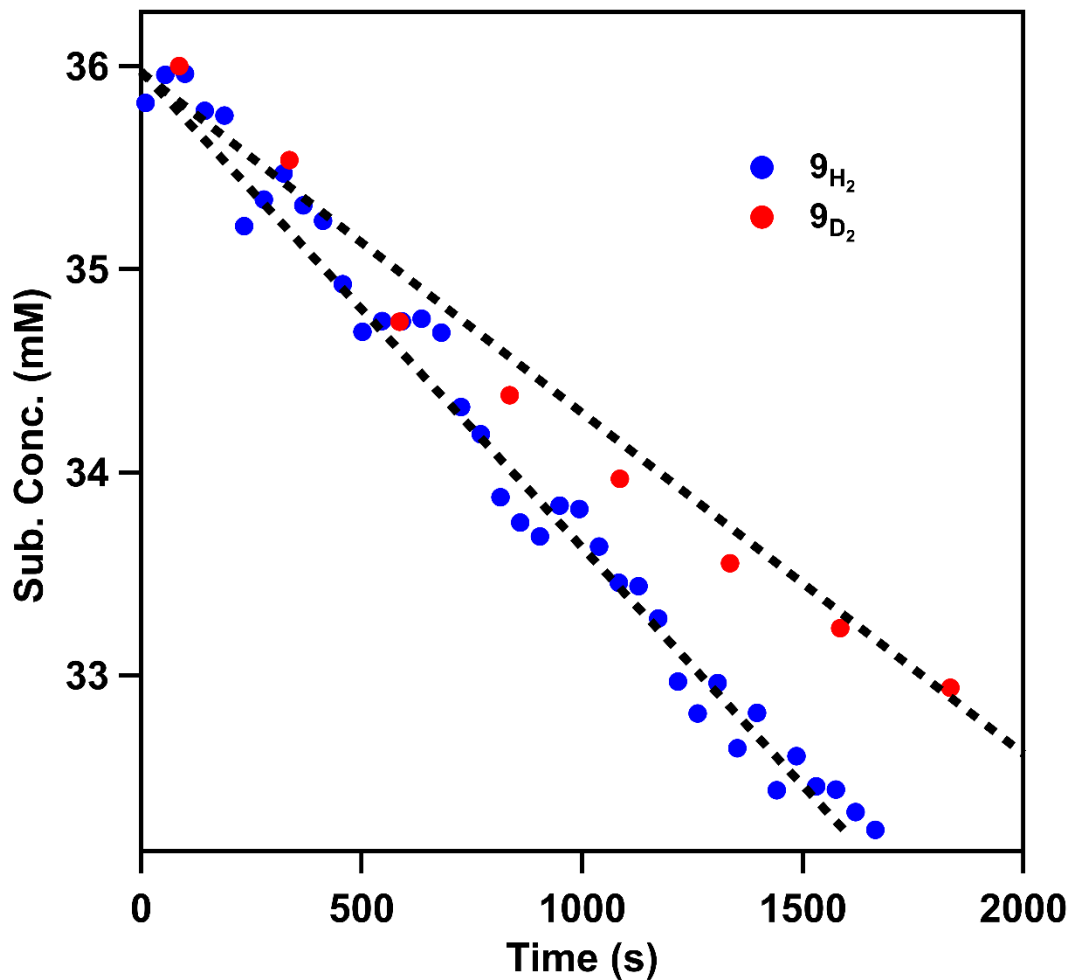

**Figure S3. Intermolecular kinetic isotope effect reaction profile.** Plotting the first 10% conversion of  $9\text{H}_2$  (blue) and  $9\text{D}_2$  (red) into  $10\text{H}_2$  and  $10\text{D}_2$  over time, respectively. Intermolecular KIE is derived by taking the ratio of the slopes of the linear fits. Every measurement is done in triplicates. (Intermolecular KIE =  $1.35 \pm 0.03$ ,  $[\mathbf{4F}] = 6.4 \text{ mM}$ )

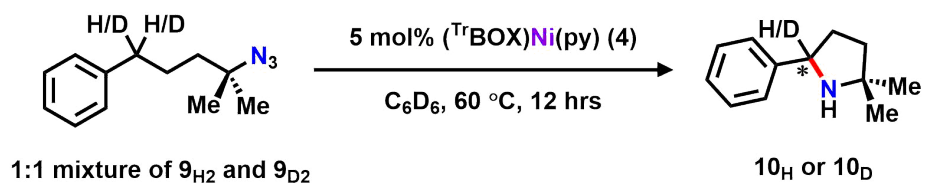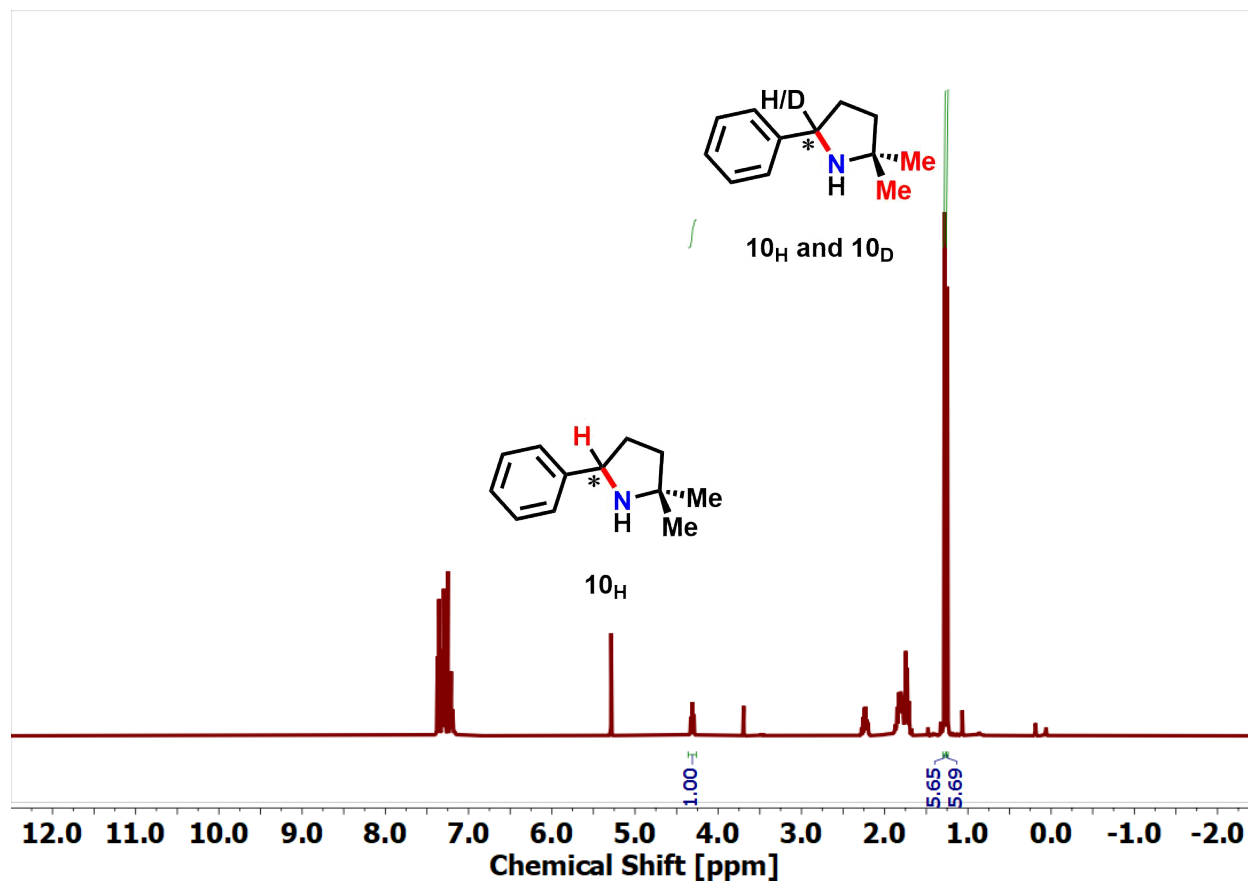

**Figure S4. Competition KIE measurement.** Reaction is carried out by subjecting a 1:1 mixture of  $9_{H_2}$  and  $9_{D_2}$  to standard catalytic conditions (5 mol% **4**, 60 °C, 12 h), and the product is isolated by aqueous acid-base extraction. The experiment is done in triplicate, and competition KIE is measured to be 1.13(6) based on integration of the product  $^1H$  NMR spectra.

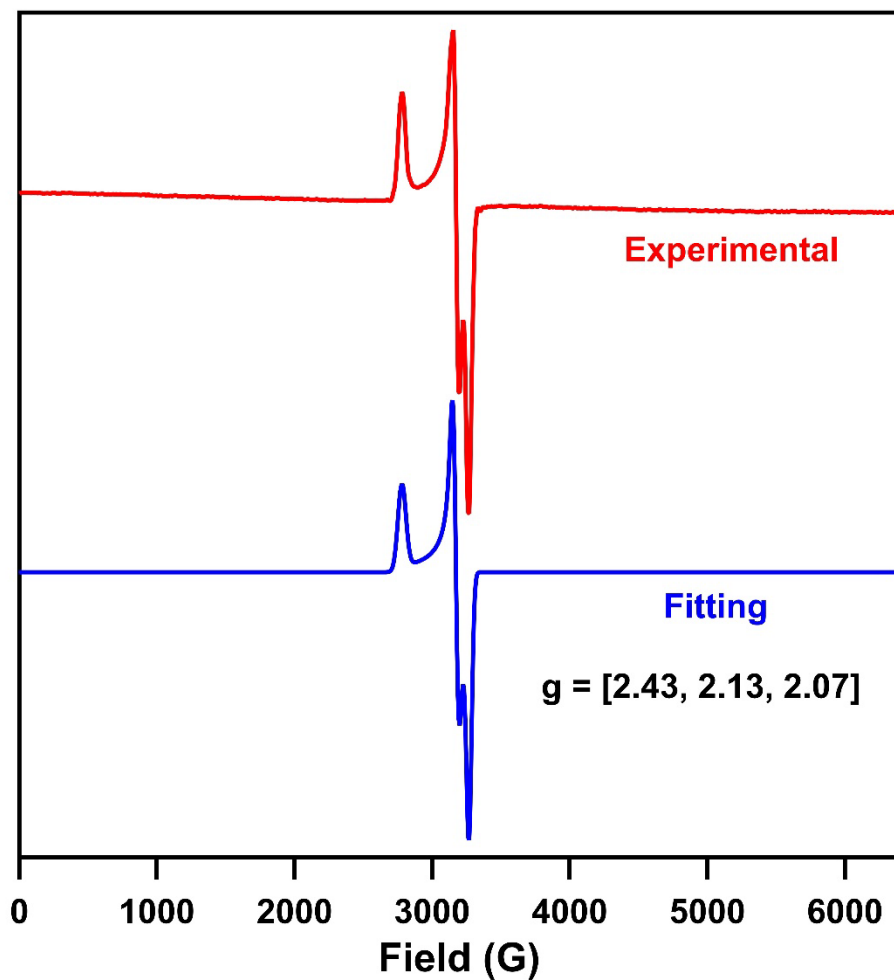

**Figure S5.** Frozen solution EPR spectrum of  $(\text{Tr}^{\text{H}}\text{BOX})\text{Ni}(\text{py})$  (**4**) collected at 77 K in toluene (Red). Blue line represents a fit of the data using the program EasySpin. Fitting parameters:  $S = \frac{1}{2}$ ,  $g_1 = 2.43$ ,  $g_2 = 2.13$ ,  $g_3 = 2.07$ .

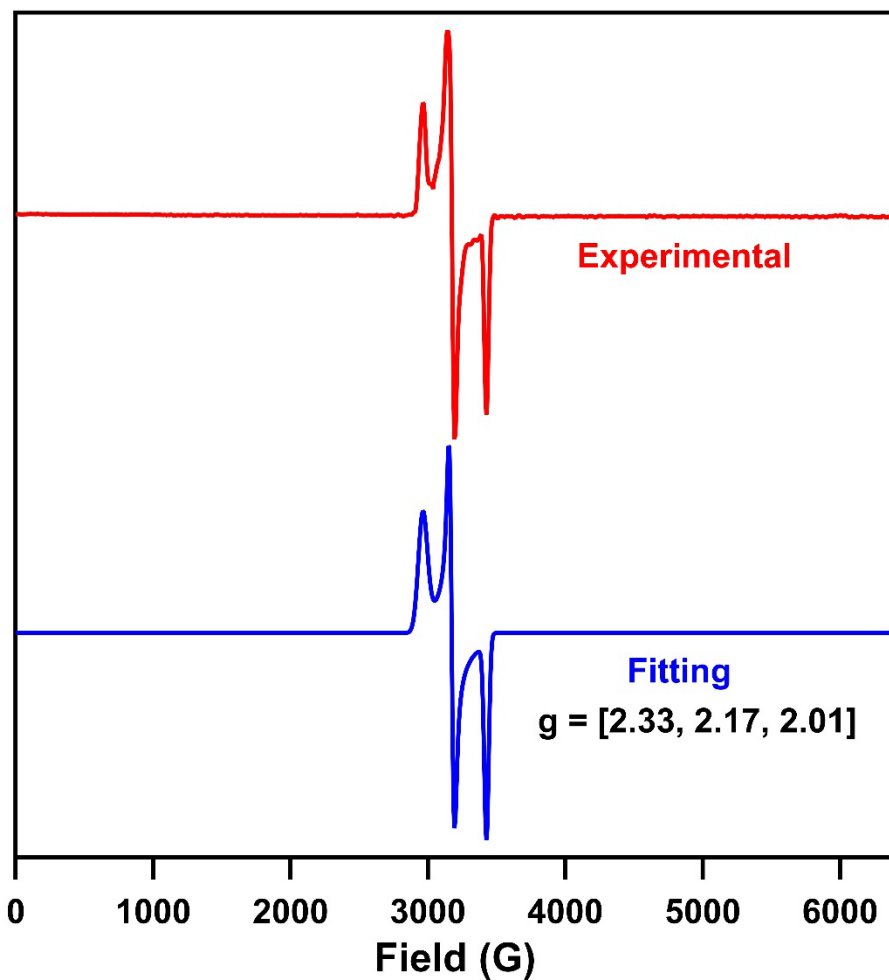

**Figure S6.** Frozen solution EPR spectrum of  $(\text{Tr}^{\text{H}}\text{BOX})\text{Ni}(\kappa^2\text{-N}_4\text{Ad}_2)$  (**5**) collected at 77 K in toluene (Red). Blue line represents a fit of the data using the program EasySpin. Fitting parameters:  $S = \frac{1}{2}$ ,  $g_1 = 2.33$ ,  $g_2 = 2.17$ ,  $g_3 = 2.01$ .



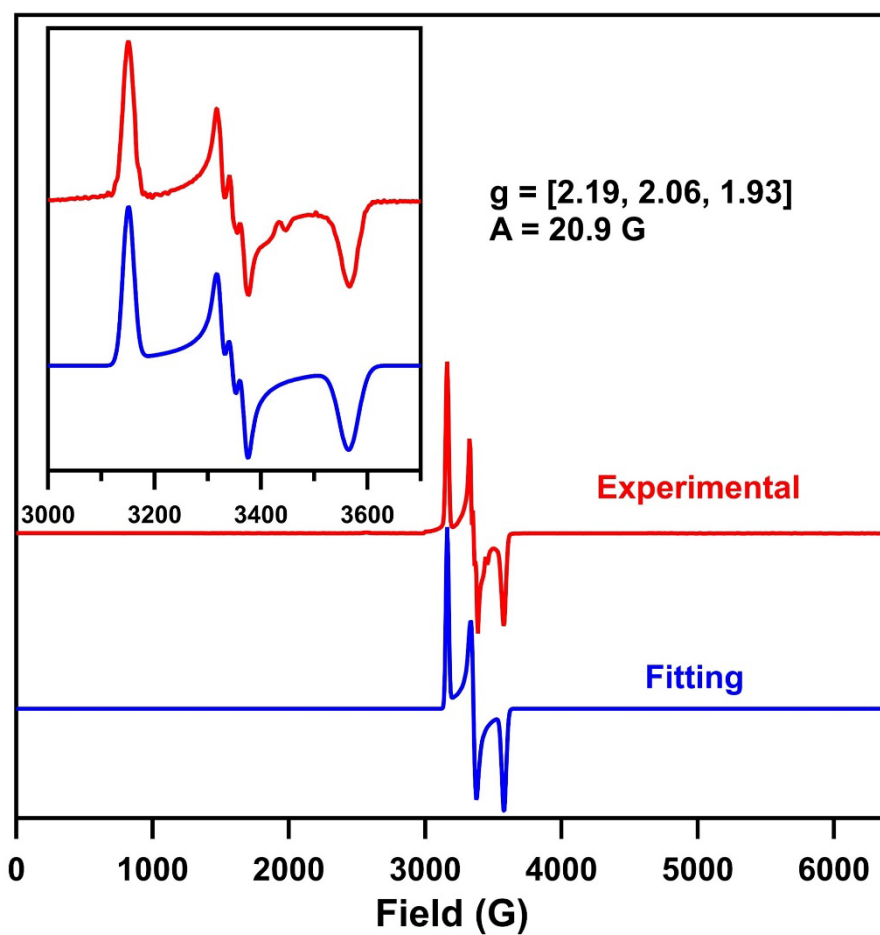

**Figure S7.** Frozen solution EPR spectrum of  $(\text{Tr}^{\text{H}}\text{BOX})\text{Ni}(\text{NAd})$  (**6**) collected at 77 K in toluene (Red). Blue line represents a fit of the data using the program EasySpin. Fitting parameters:  $S = \frac{1}{2}$ ,  $g_1 = 2.19$ ,  $g_2 = 2.06$ ,  $g_3 = 1.93$ ;  $A(^{14}\text{N}) = 20.9 \text{ G}$ .

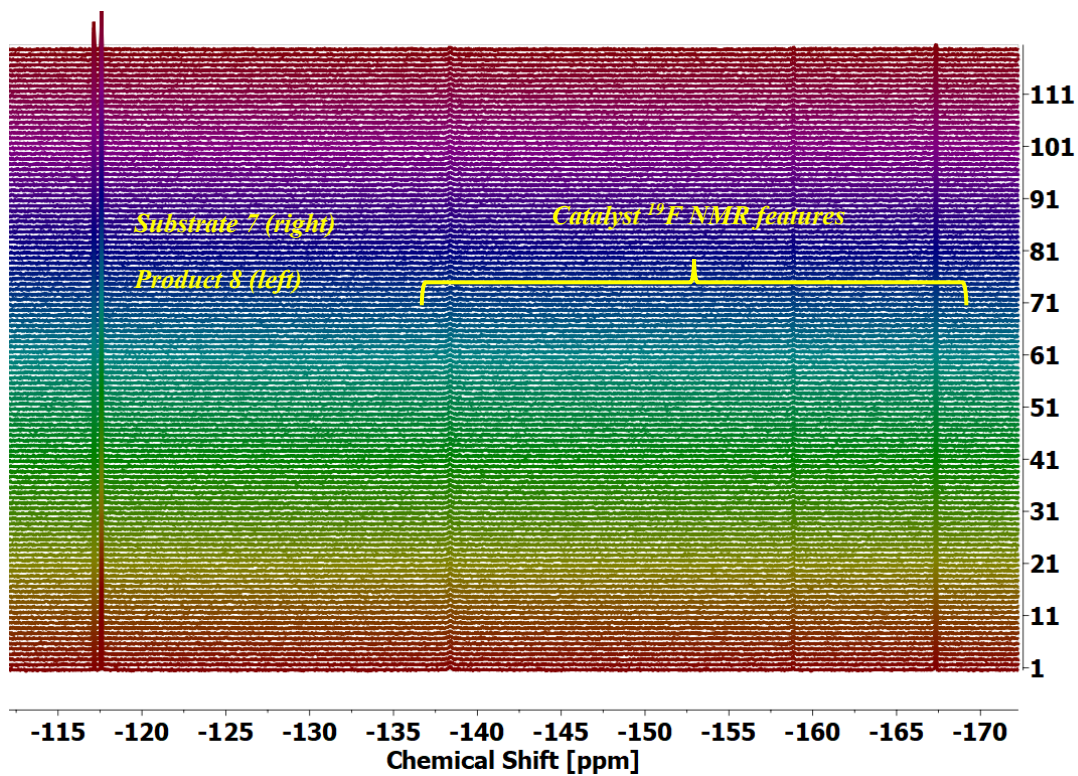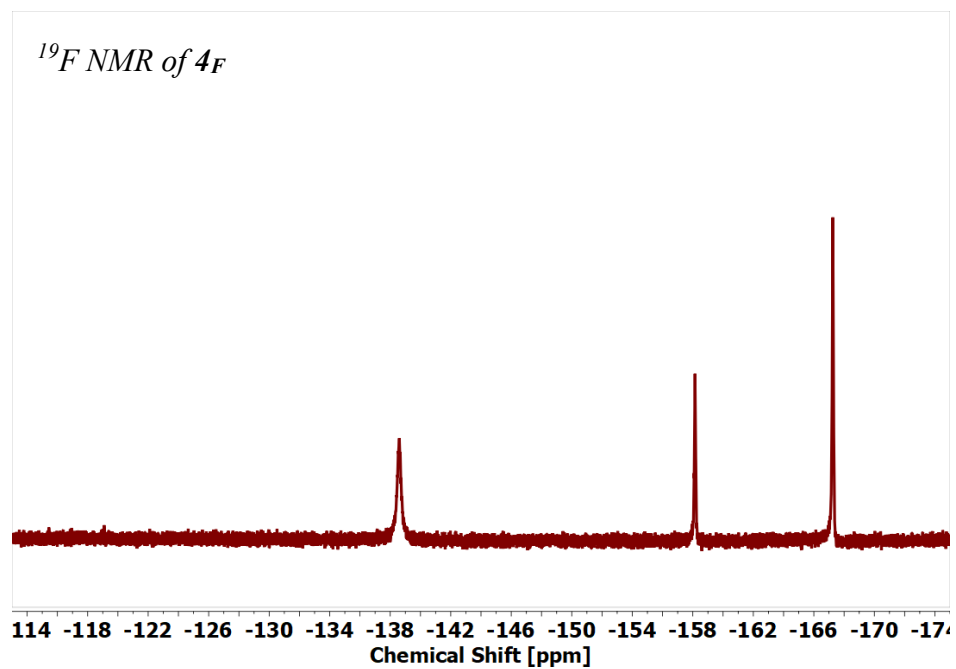

Figure S8.  $^{19}\text{F}$  NMR spectra of reaction mixture during catalytic conversion of **7** to **8** up to **30% conversion**. Spectra suggests that the resting state of Ni catalyst during the transformation has similar spectroscopic features to that of pre-catalyst ( $\text{Tr}^{\text{H}}\text{BOX}$ )Ni(py) (**4F**).

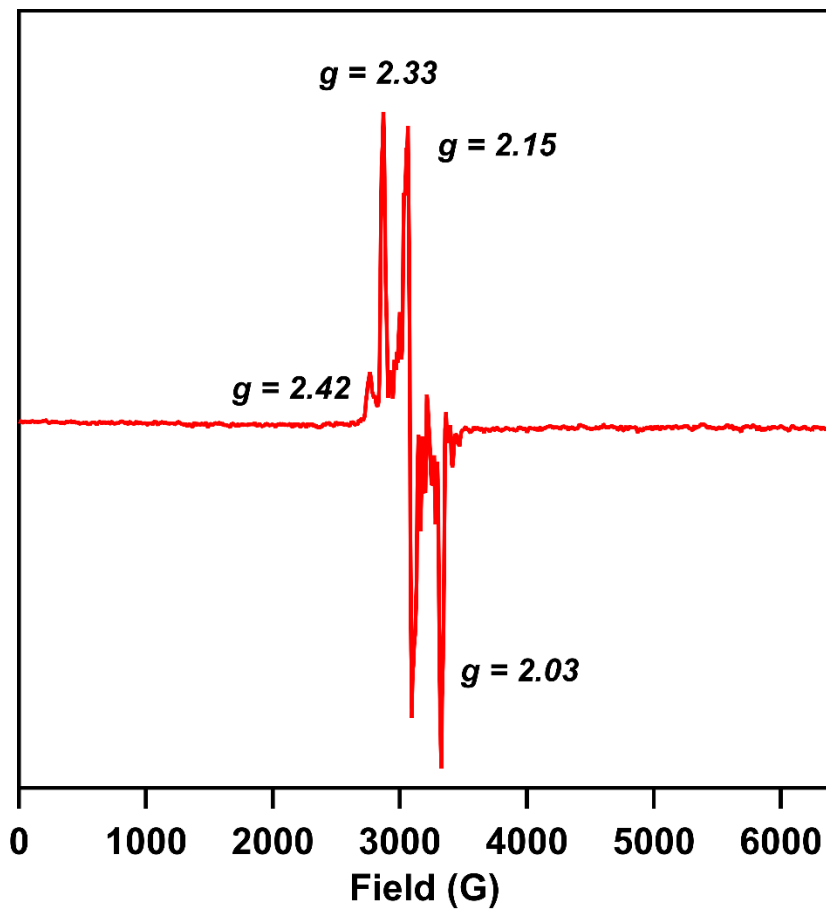

**Figure S9.** Frozen solution EPR spectrum of reaction mixture during catalytic conversion of **7 to 8 at 80% conversion** collected at 77 K in toluene (Red). Spectrum suggests a mixture of tetrazido Ni-complex ( $S = \frac{1}{2}$ ,  $g_1 = 2.33$ ,  $g_2 = 2.17$ ,  $g_3 = 2.01$ ) and at least one species with features similar to that of ( $\text{Tr}^{\text{F}}$ BOX)Ni(py) (**4<sub>F</sub>**,  $S = \frac{1}{2}$ ,  $g_1 = 2.43$ ,  $g_2 = 2.13$ ,  $g_3 = 2.07$ ). No features at  $g = 1.93$  (Ni-iminyl) is observed.

**Figure S10.  $^1\text{H}$  and  $^{19}\text{F}$  NMR spectra for reaction of Ad-tetrazido complex **5F** and substrate **9** testing for reversible tetrazine formation**

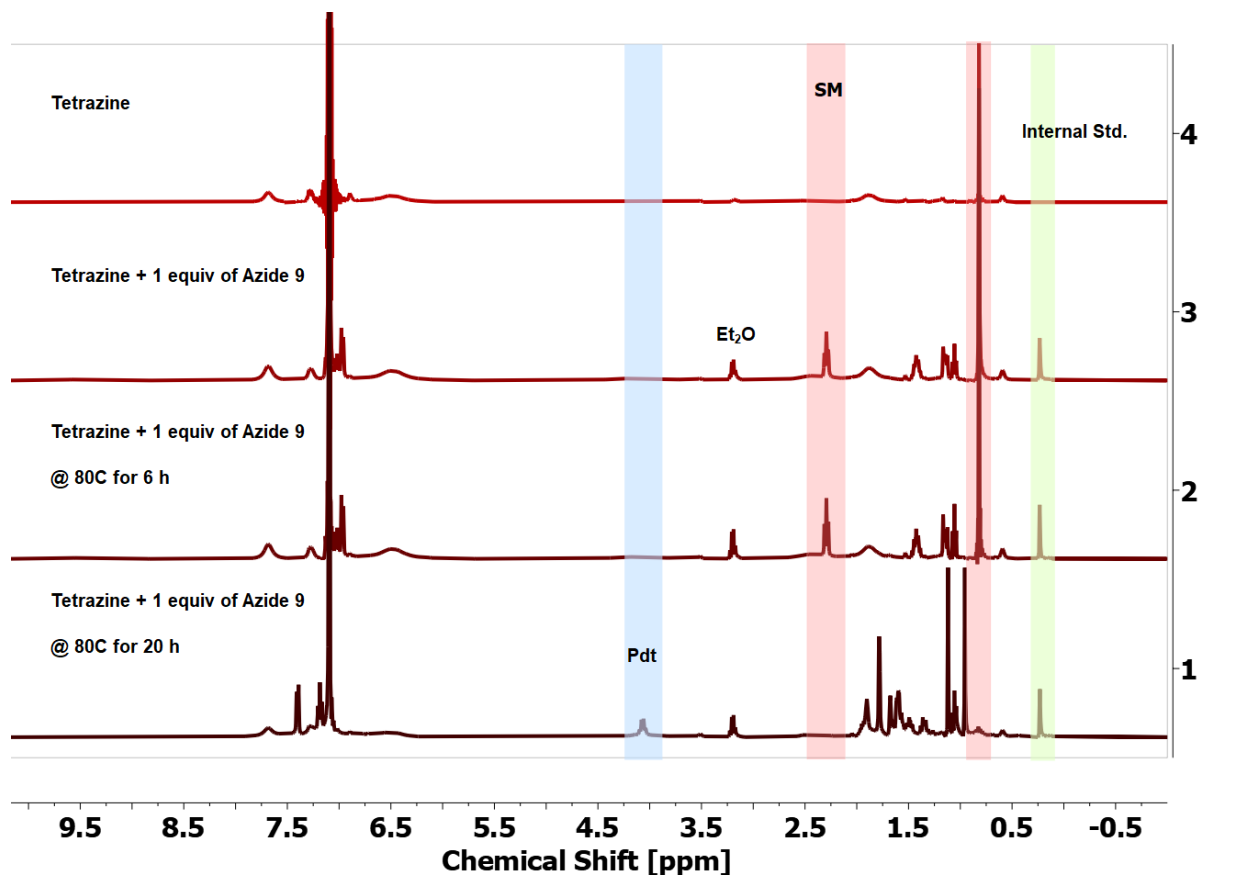

$^1\text{H}$  NMR stack for an equimolar  $\text{C}_6\text{D}_6$  solution of tetrazido complex **5F** and azide substrate **9** showing a long induction period (no product observed during the first 6 h of the reaction) and full disappearance of substrate **9** along with generation of product **10** after 20 h. (small amount of  $\text{Et}_2\text{O}$  left over from workup of **5F**)

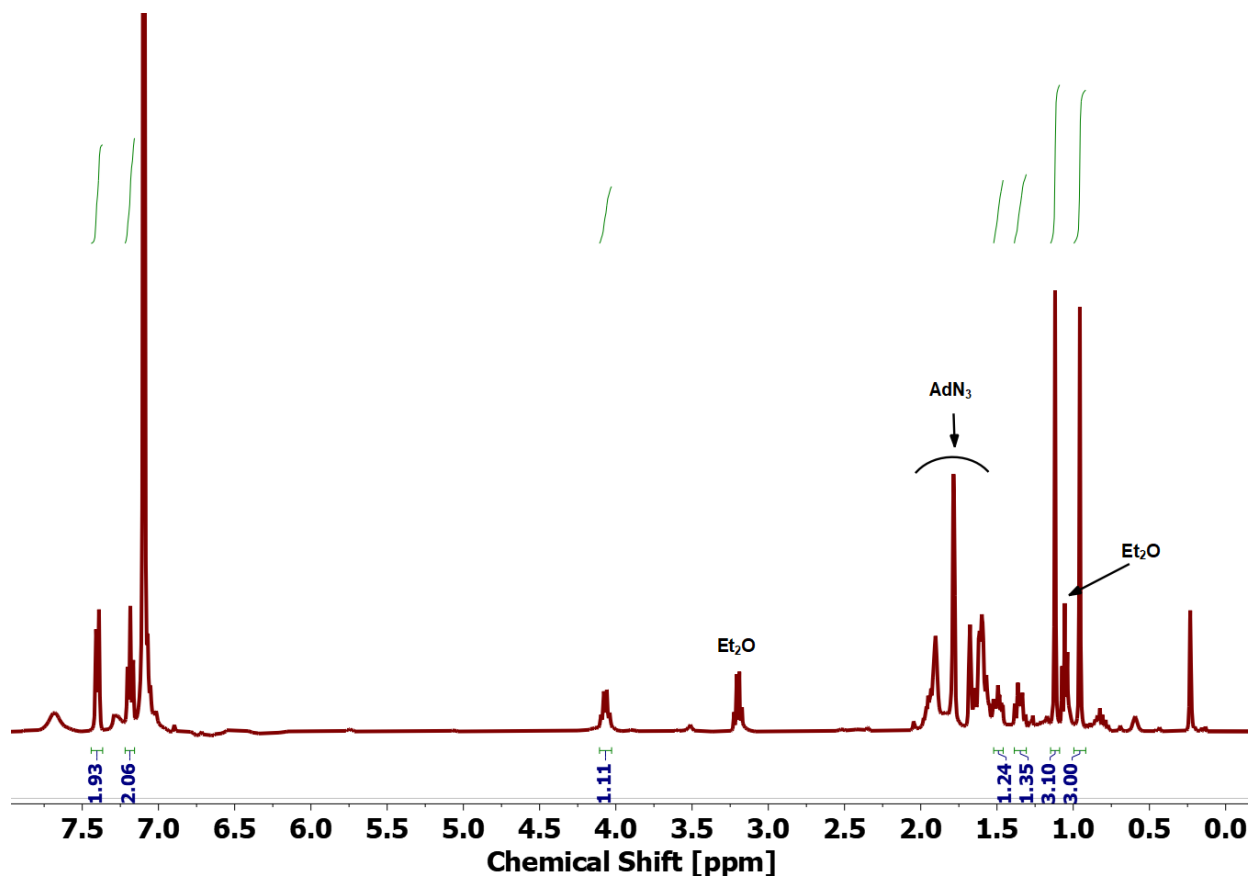

$^1\text{H}$  NMR of final reaction mixture showing the generation of product **10** as well as  $\text{AdN}_3$  liberated from tetrazido complex **5F** via azide shuffling.

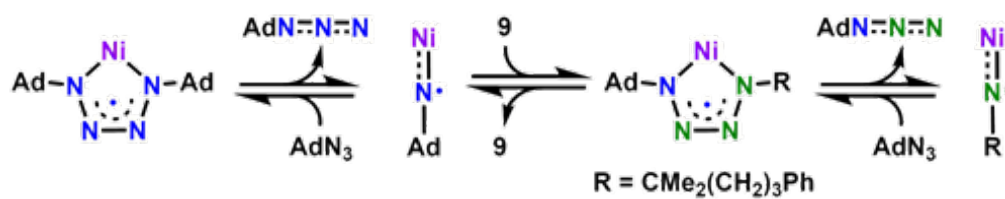

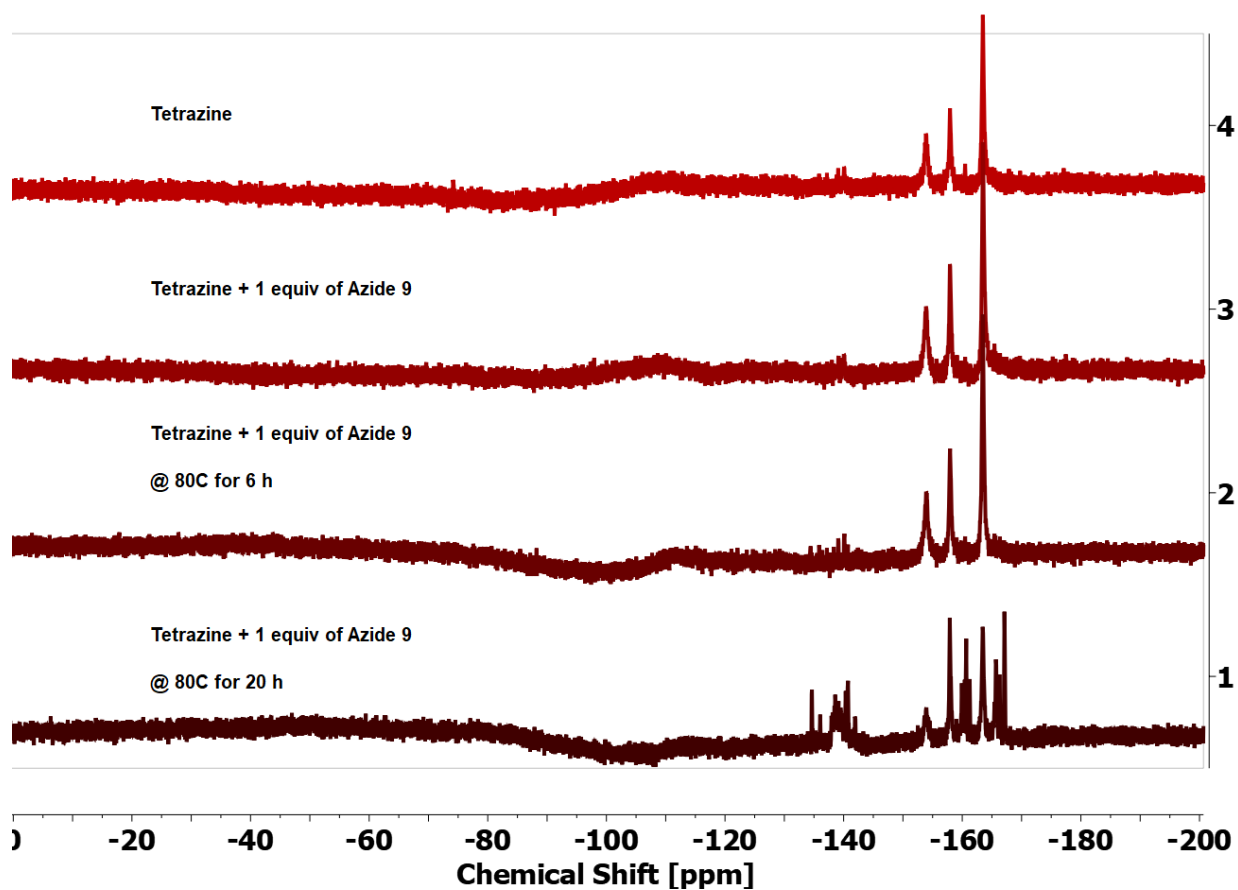

$^{19}\text{F}$  NMR stack for an equimolar  $\text{C}_6\text{D}_6$  solution of tetrazido complex  $5_{\text{F}}$  and azide substrate  $9$  showing partial decomposition of  $5_{\text{F}}$  into a mixture of indiscernible complexes at the end of the transformation.

### Pyrrolidine enantio-enrichment test for C–N bond formation reversibility

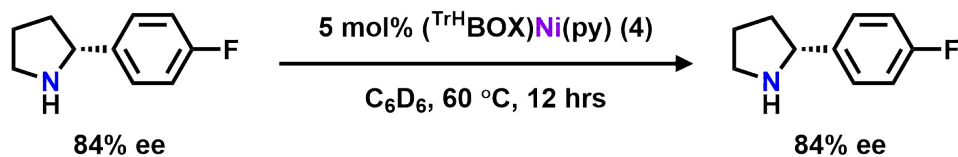

To test for the reversibility of C–N bond forming step, enantio-enriched (R)-2-(4-fluorophenyl)pyrrolidine (84% *ee* determined by Mosher analysis using <sup>19</sup>F NMR spectroscopy) prepared according to literature procedures was subjected to catalytic conditions (5 mol% 60 °C, 12 h). <sup>1</sup>H and <sup>19</sup>F NMR spectra taken during the reaction suggest no additional organic species formation. The pyrrolidine recovered via aqueous acid-base workup is similarly analyzed using Mosher analysis, showing the same level of enantio-enrichment (84 % *ee*). The overall result suggests that the C–N bond formation step is irreversible.

**Figure S11. Crossover catalytic reaction using 7 and 9D2**

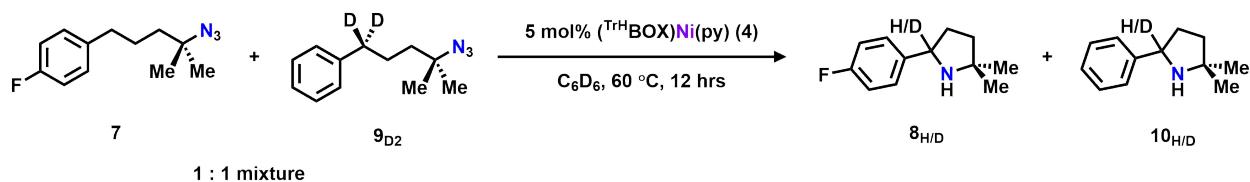

To test the possibility for intermolecular H-atom transfer, a 1:1 mixture of 1-(4-azido-4-methylpentyl)-4-fluorobenzene (7) and (4-azido-4-methylpentyl-1,1-d<sub>2</sub>)benzene (9D<sub>2</sub>) is subjected to catalytic condition (5 mol% 4, 60 °C, 12 h). Integration from <sup>1</sup>H NMR spectrum of the isolated product mixture suggests the presence of only 8<sub>H</sub> and 10<sub>D</sub> with no H/D crossover product (8<sub>D</sub> and 10<sub>H</sub>).

Furthermore, intermolecular HAT will result in the formation of a Ni(II) amide species without the capability of pyrrolidine formation, ultimately lead to corresponding amine product after quenching the reaction. Since in every catalytic run the work up procedure only involves an aqueous acid-base extraction, and no amine formation was observed in the product NMR spectra, the result overall suggest no intermolecular H-atom transfer takes place under the catalytic conditions.



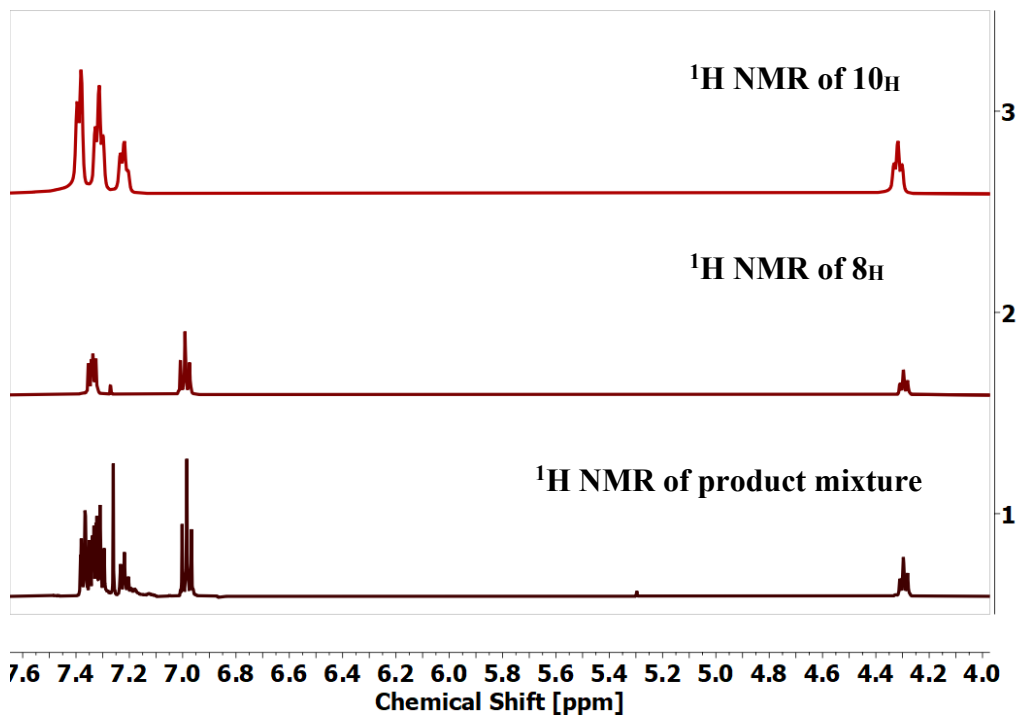

$^1\text{H}$  NMR stack of  $10_{\text{H}}$ ,  $8_{\text{H}}$  and product mixture from the crossover experiment

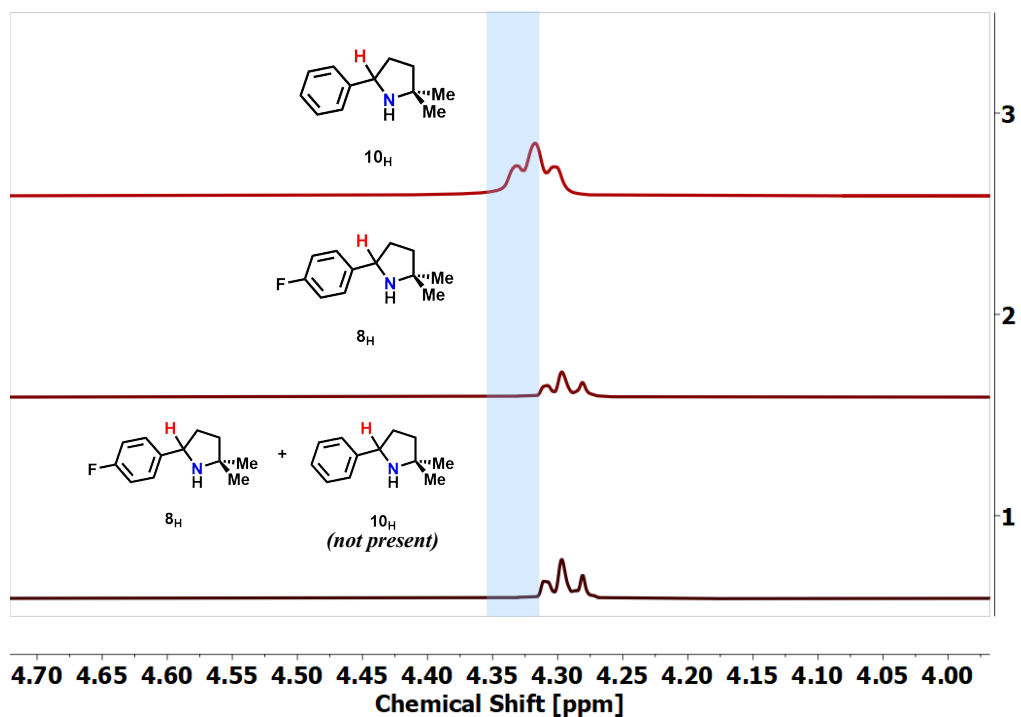

$^1\text{H}$  NMR region corresponding to the  $\alpha$ -H next to nitrogen atom in  $10_{\text{H}}$ ,  $8_{\text{H}}$  and product mixture showing the absence of  $10_{\text{H}}$

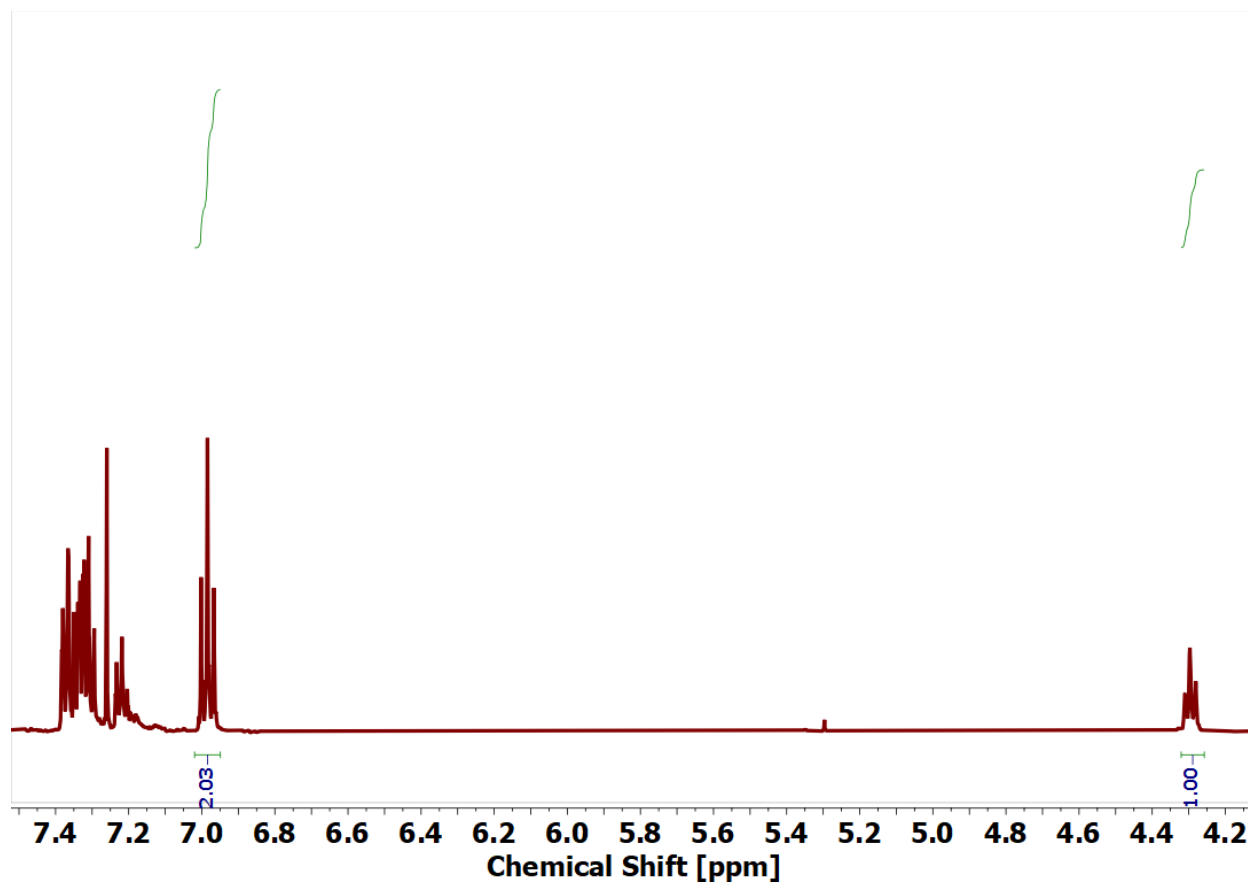

Integration value for peaks corresponding to **8<sub>H</sub>** showing no significant amount of **8<sub>D</sub>** formation

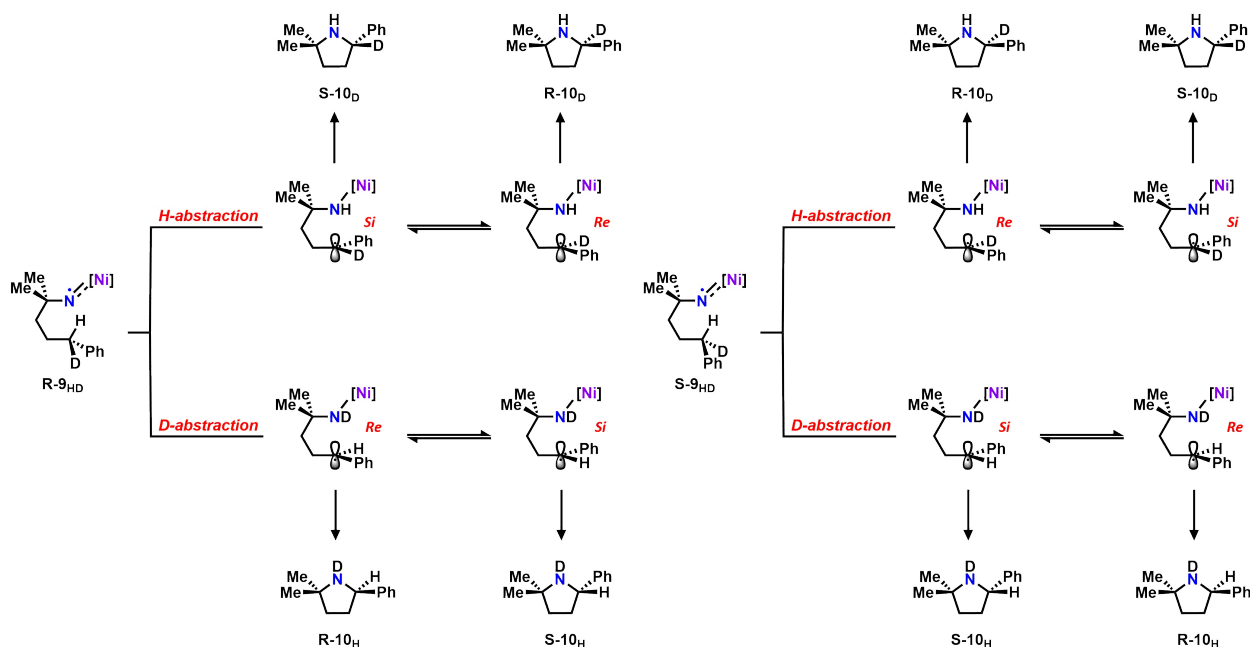

| Azide             | S-10 <sub>H</sub> | R-10 <sub>H</sub> | S-10 <sub>D</sub> | R-10 <sub>D</sub> | (R-10 <sub>D</sub> +S-10 <sub>D</sub> )/ (R-10 <sub>H</sub> +S-10 <sub>H</sub> ) | S-10 <sub>H</sub> /R-10 <sub>H</sub> | S-10 <sub>D</sub> /R-10 <sub>D</sub> |
|-------------------|-------------------|-------------------|-------------------|-------------------|----------------------------------------------------------------------------------|--------------------------------------|--------------------------------------|
| S-9 <sub>HD</sub> | 3.5%              | 1.7%              | 60.4%             | 34.4%             | 18.3:1                                                                           | 2.08                                 | 1.76                                 |
| R-9 <sub>HD</sub> | 23.2%             | 11.6%             | 49.9%             | 15.3%             | 1.88:1                                                                           | 2.00                                 | 3.25                                 |

To test the possibility of a time-dependent product distribution in the intramolecular KIE experiment, we subjected **R-9<sub>HD</sub>** to catalytic condition in two separate trials and quenched the reaction at 30% and 50% conversion as observed by <sup>1</sup>H NMR spectroscopy. No significant differences were noted in the product distribution at various conversions.

| Conv. | S-10 <sub>H</sub> | R-10 <sub>H</sub> | S-10 <sub>D</sub> | R-10 <sub>D</sub> |
|-------|-------------------|-------------------|-------------------|-------------------|
| 30%   | 24.0%             | 12.2%             | 49.3%             | 14.5%             |
| 50%   | 25.0%             | 11.8%             | 48.7%             | 14.4%             |
| full  | 23.2%             | 11.6%             | 49.9%             | 15.3%             |

**Figure S12. Product distribution using enantiopure mono D-labeled substrates S-10<sub>HD</sub> and R-10<sub>HD</sub>.** The two pairs of enantiomers (S-10<sub>H</sub> and R-10<sub>H</sub>; S-10<sub>D</sub> and R-10<sub>D</sub>) are resolved using Mosher analysis and the ratios are obtained using <sup>1</sup>H NMR spectroscopy. All reactions were carried out using standard catalytic conditions at room temperature.

# Analysis of intramolecular isotope labelling experiment

## Product mixture from S-9<sub>HD</sub>

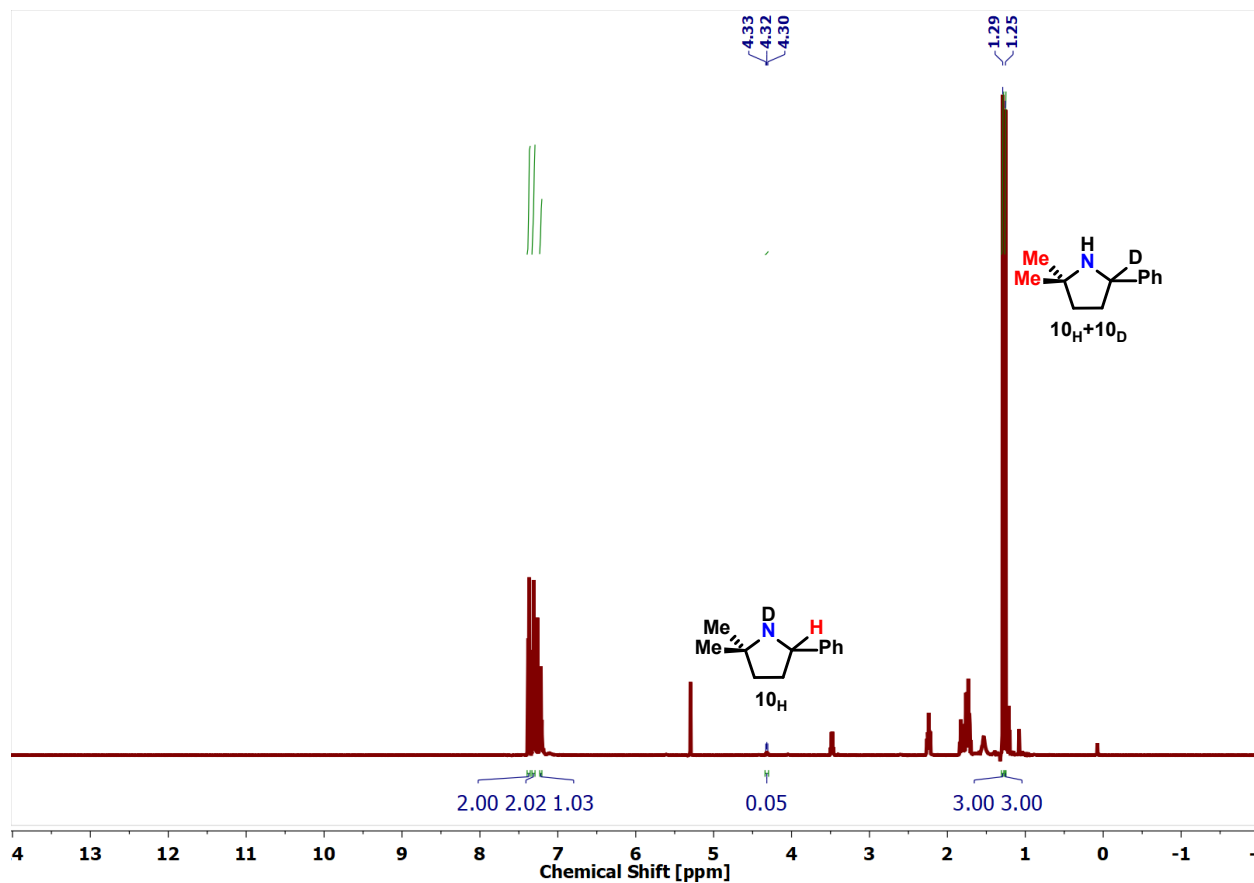

| Chemical Shift/ppm | Absolute Integration | 10 <sub>D</sub> /10 <sub>H</sub> |
|--------------------|----------------------|----------------------------------|
| 4.32 (t)           | 180.12               | 17.97                            |
| 1.29 (s)           | 10252.41             |                                  |
| 1.25 (s)           | 10252.15             |                                  |

Product mixture from R-9<sub>HD</sub>

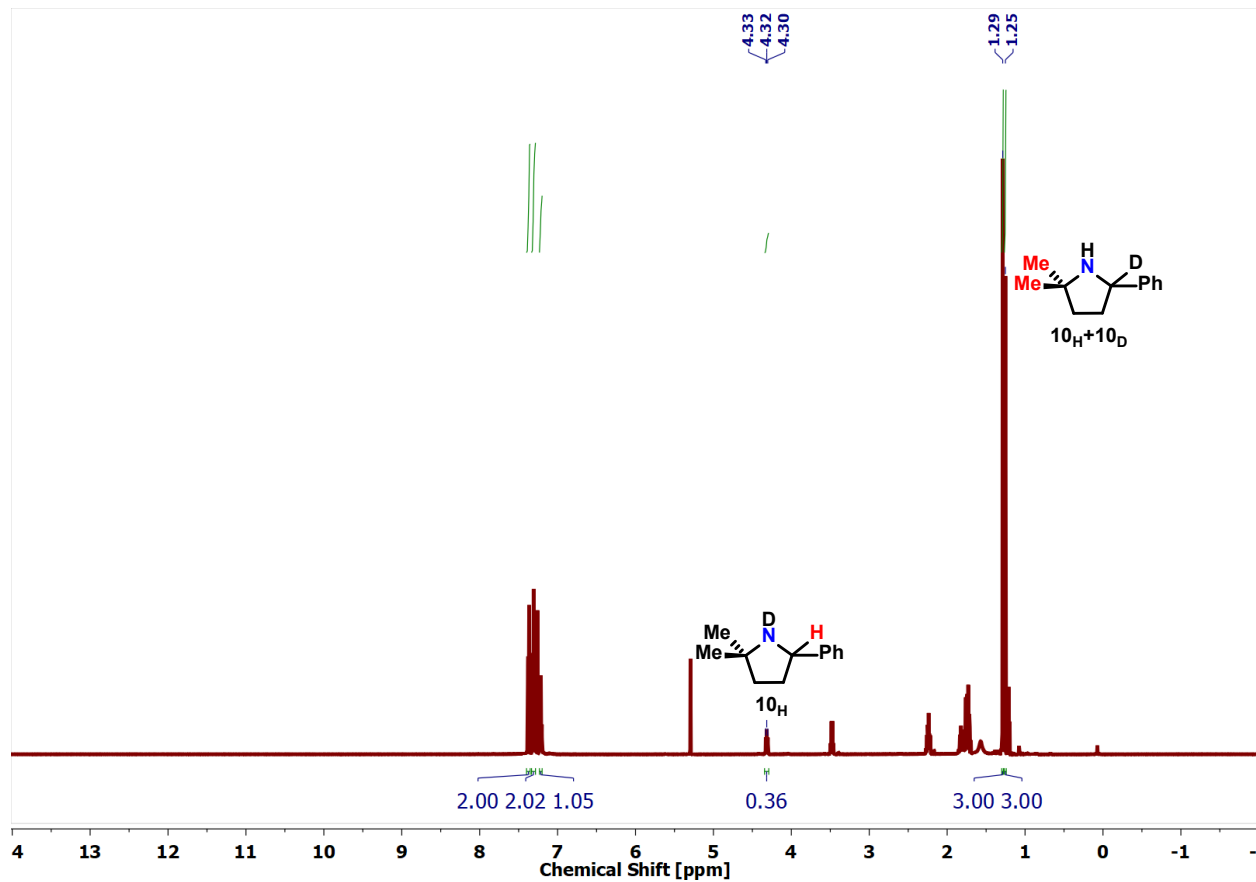

| Chemical Shift/ppm | Absolute Integration | 3 <sub>D</sub> /3 <sub>H</sub> |
|--------------------|----------------------|--------------------------------|
| 4.32 (t)           | 1139.93              | 1.80                           |
| 1.29 (s)           | 9576.34              |                                |
| 1.25 (s)           | 9554.17              |                                |

# Mosher analysis of product mixture from racemic-9<sup>1</sup>

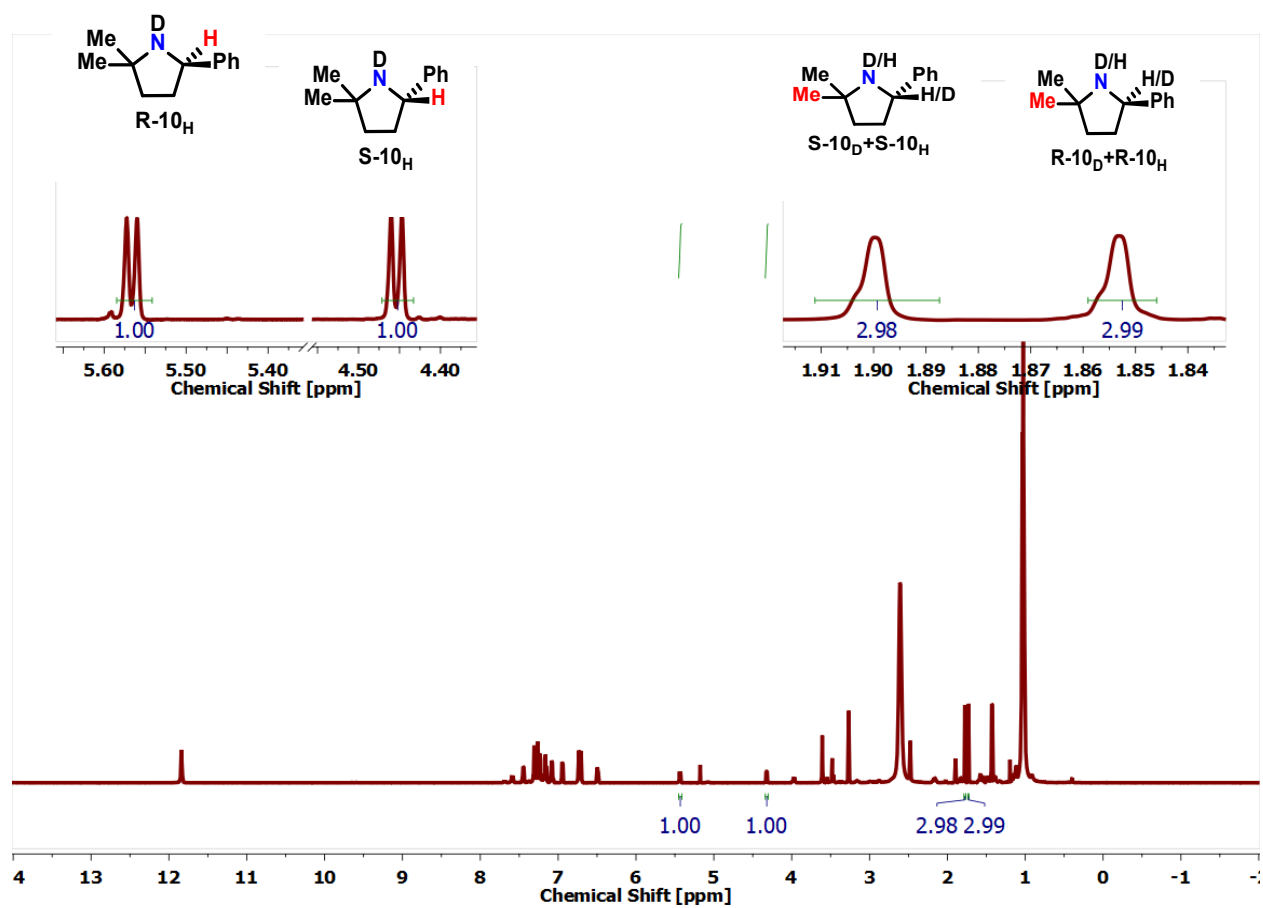

### Mosher analysis of product mixture from S-9<sub>HD</sub><sup>1</sup>

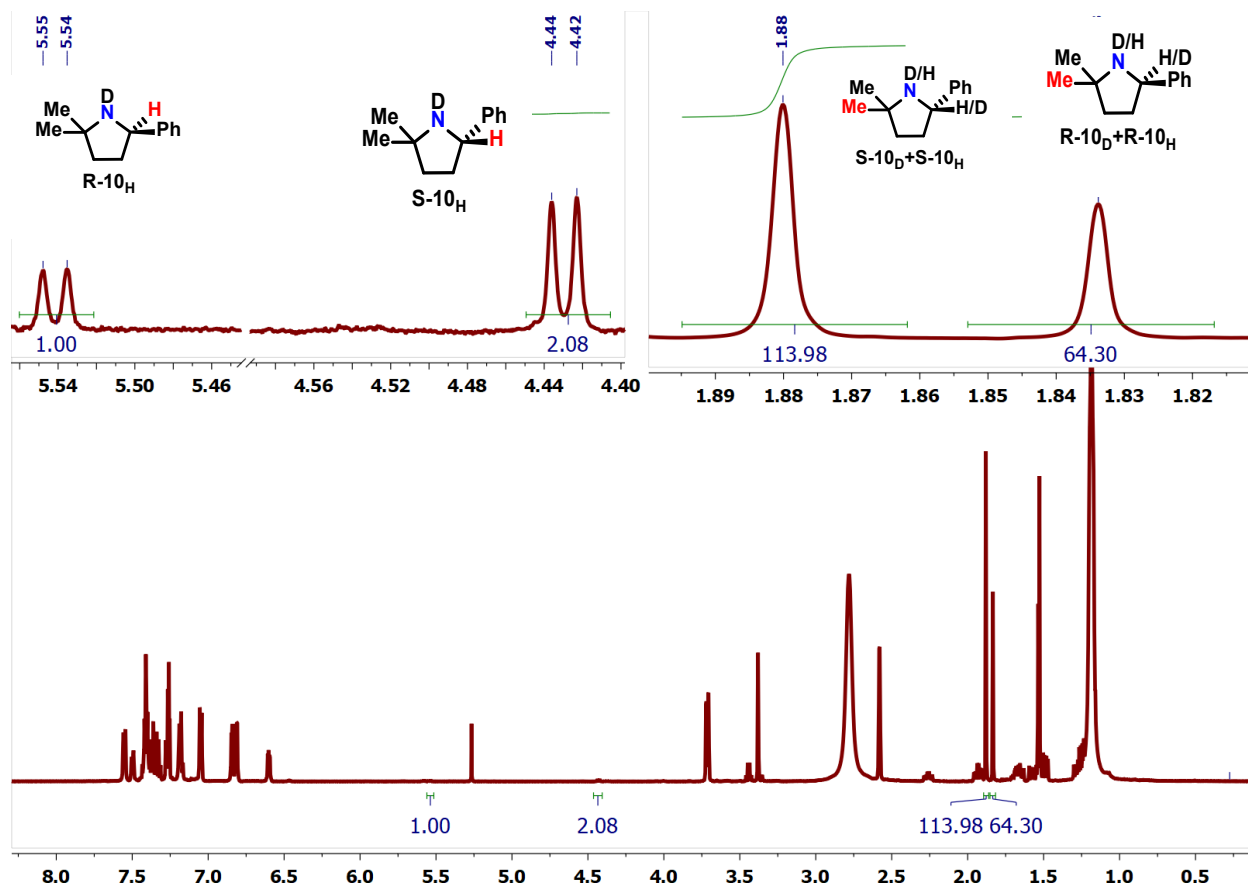

Full conversion:

| Chemical Shift/ppm |                   | Absolute Integration |                   |
|--------------------|-------------------|----------------------|-------------------|
| 5.55 (d)           |                   | 12.56                |                   |
| 4.43 (d)           |                   | 26.12                |                   |
| 1.88 (s)           |                   | 1431.13              |                   |
| 1.83 (s)           |                   | 807.32               |                   |
| R-10 <sub>H</sub>  | S-10 <sub>H</sub> | R-10 <sub>D</sub>    | S-10 <sub>D</sub> |
| 1.7%               | 3.5%              | 34.4%                | 60.4%             |

### Mosher analysis of product mixture from R-9<sub>HD</sub><sup>1</sup>

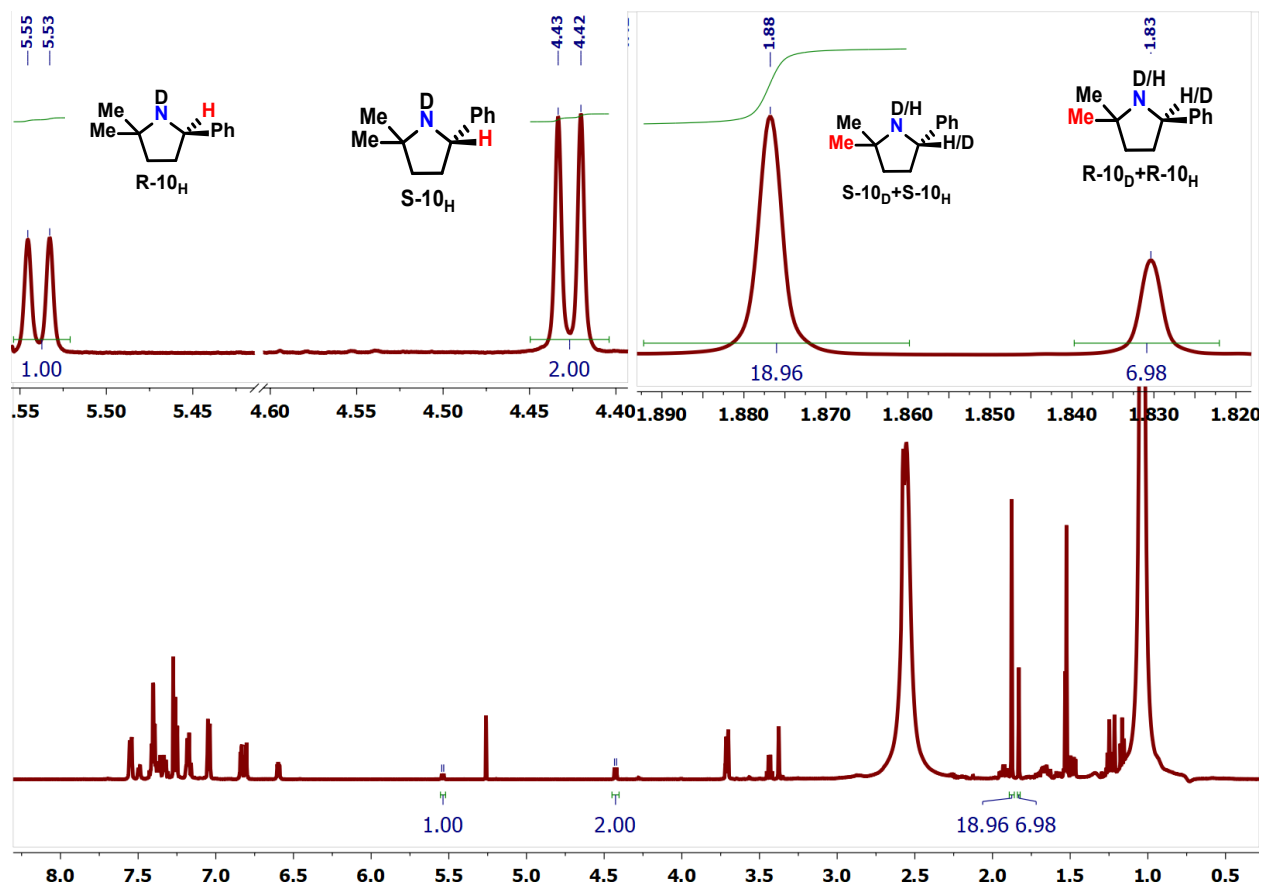

Full conversion:

| Chemical Shift/ppm |                   | Absolute Integration |                   |
|--------------------|-------------------|----------------------|-------------------|
| 5.59-5.54          |                   | 74.27                |                   |
| 4.48-4.43          |                   | 148.72               |                   |
| 1.91-1.89          |                   | 1406.47              |                   |
| 1.86-1.84          |                   | 517.90               |                   |
| R-10 <sub>H</sub>  | S-10 <sub>H</sub> | R-10 <sub>D</sub>    | S-10 <sub>D</sub> |
| 11.6%              | 23.2%             | 15.3%                | 49.9%             |



# NMR spectra of intermediates in organoazide synthesis

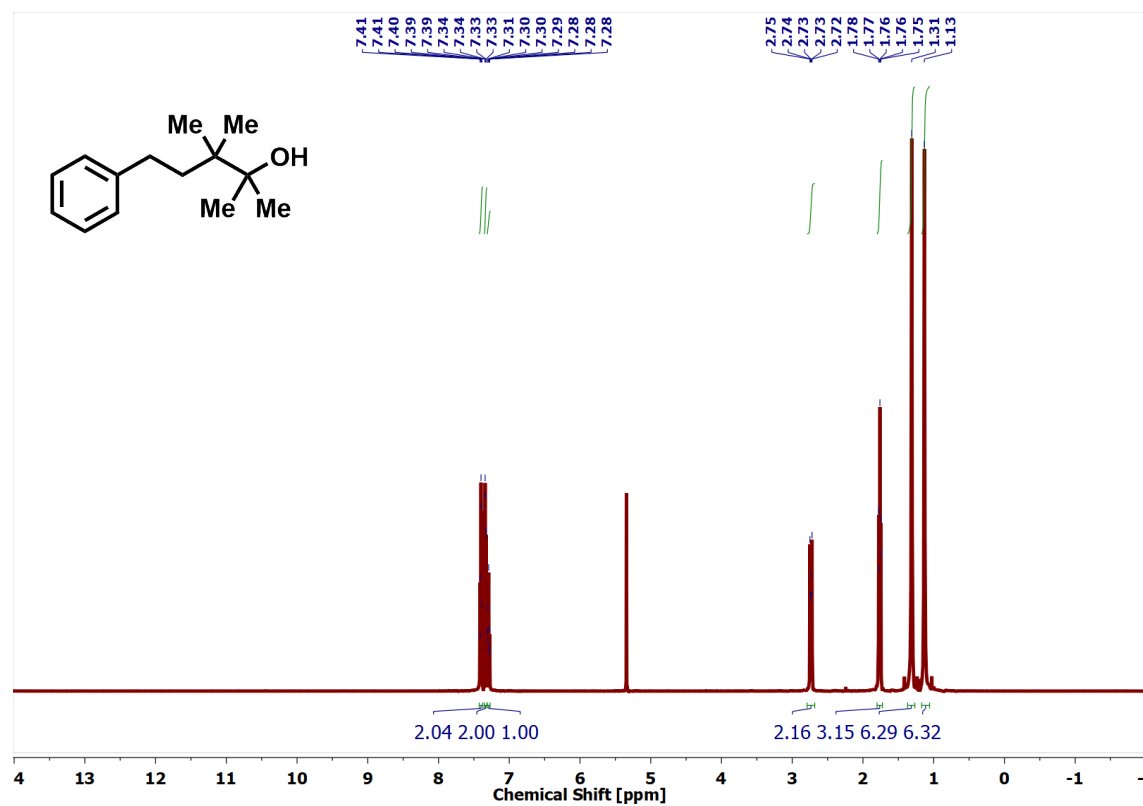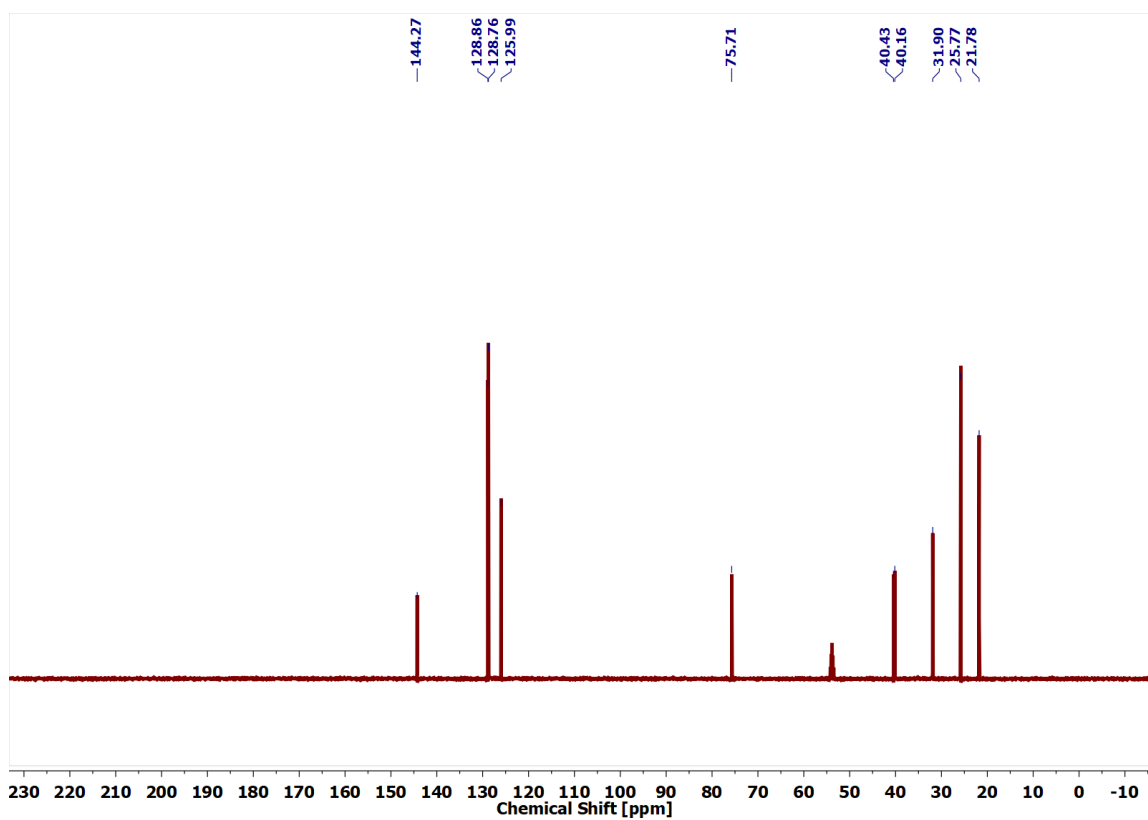

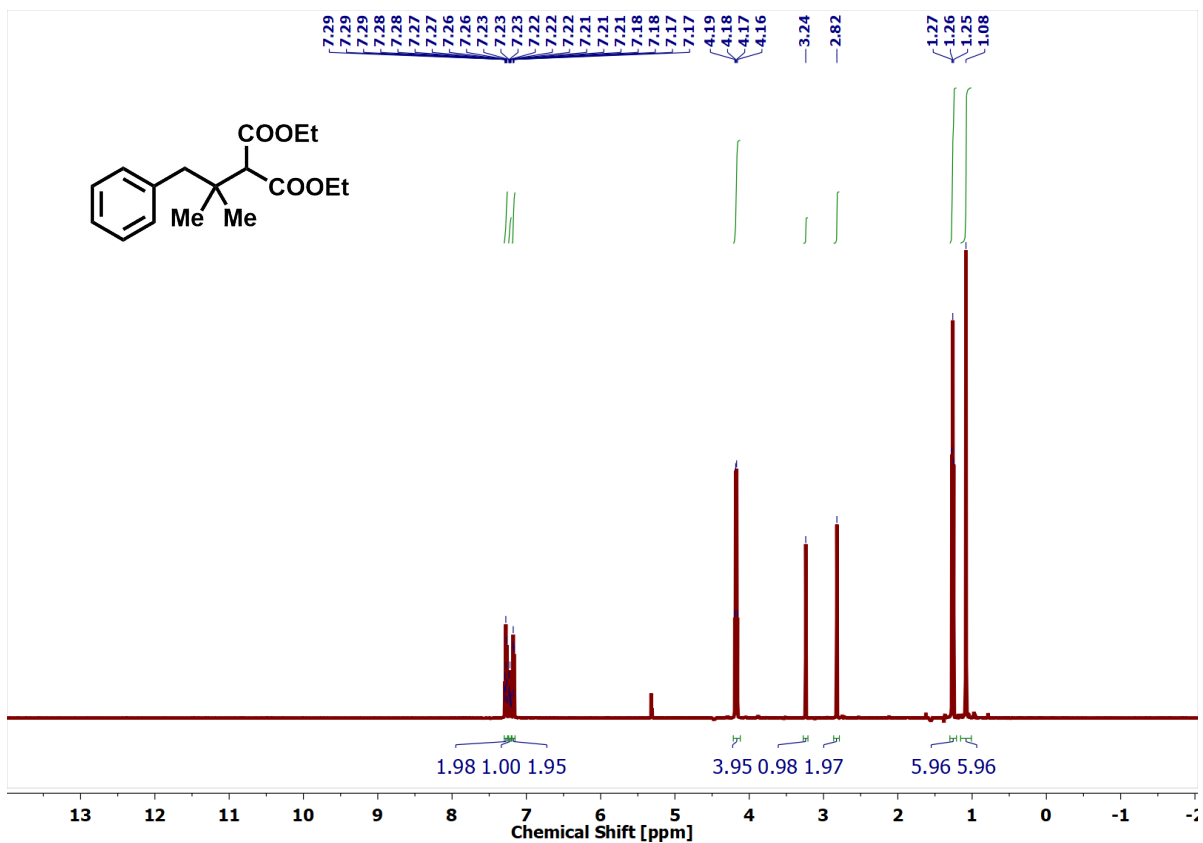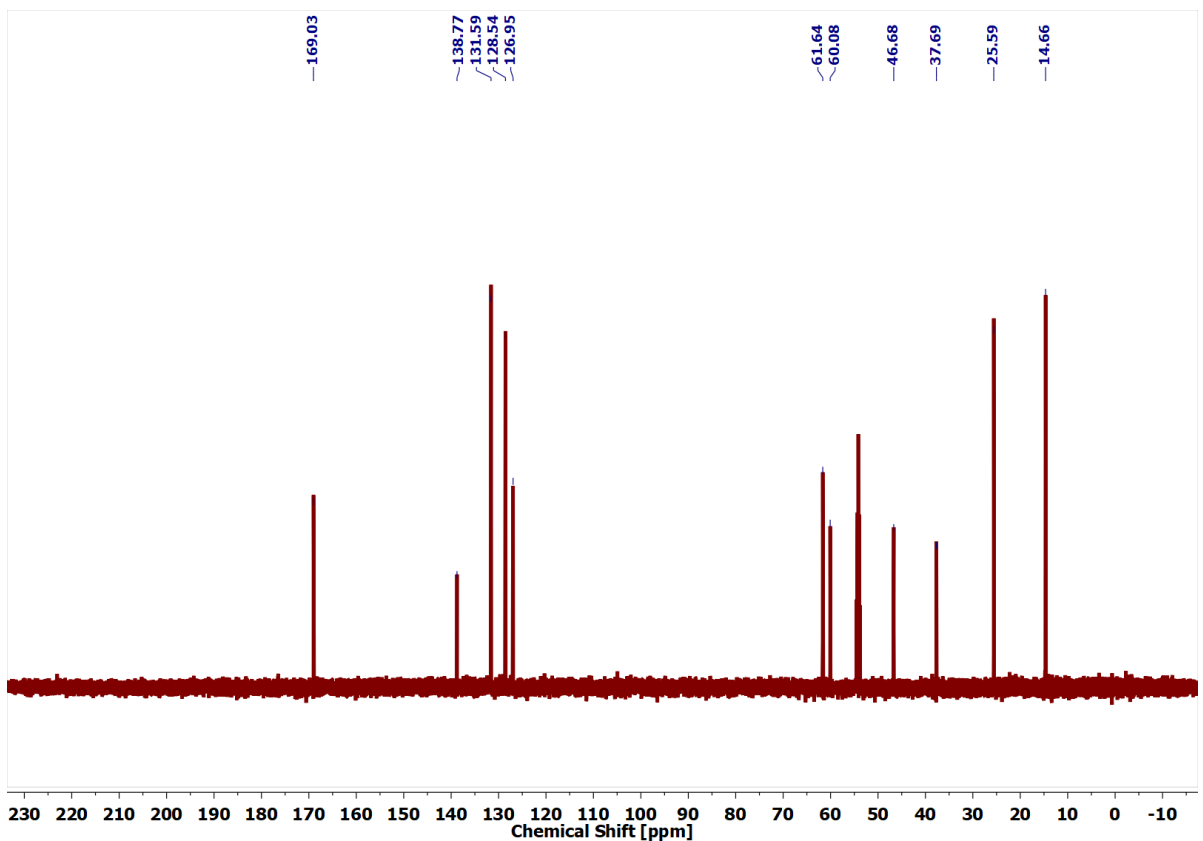

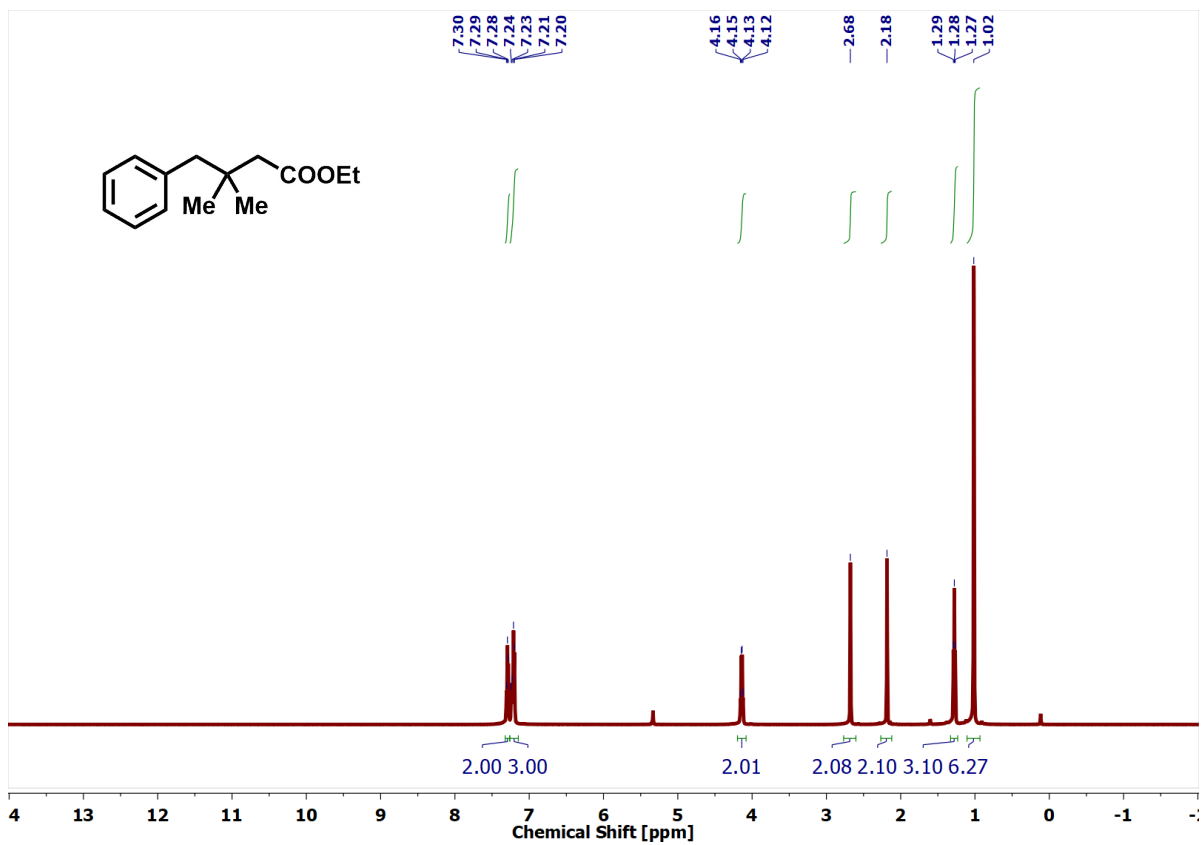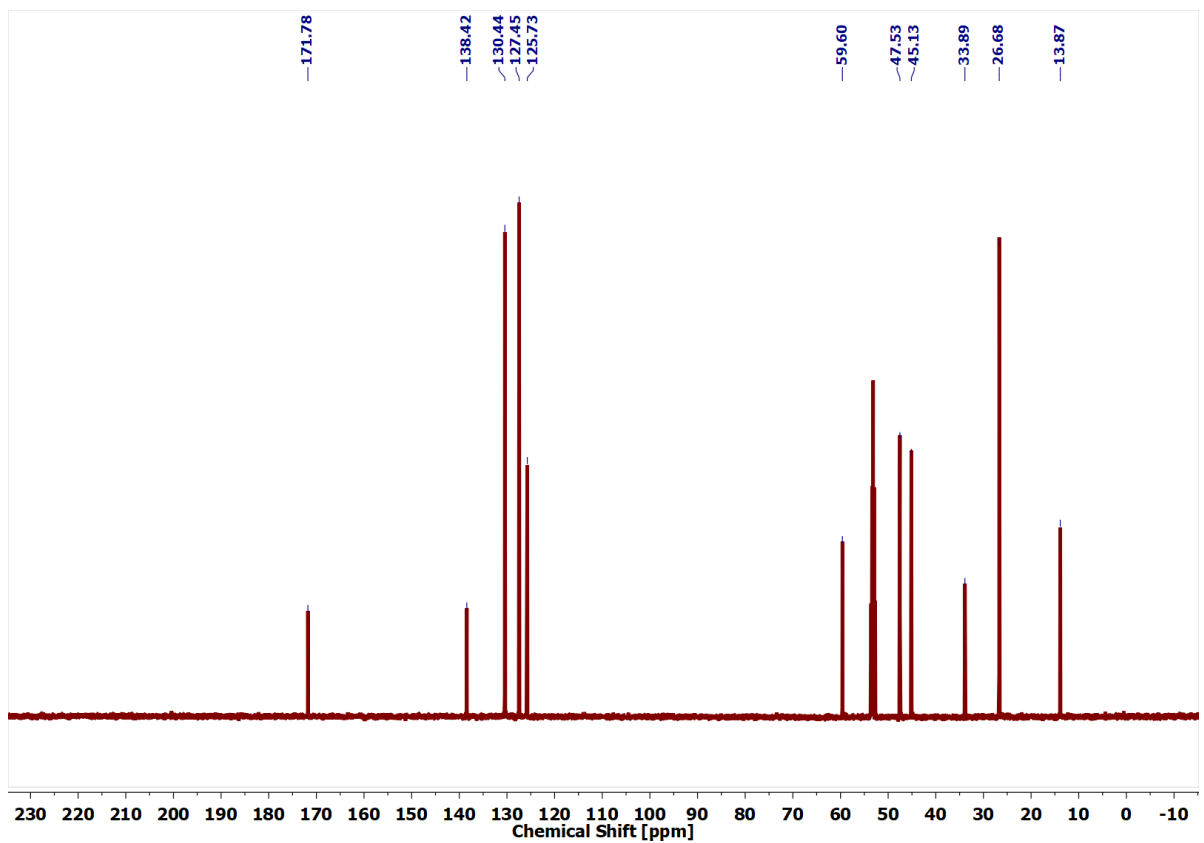

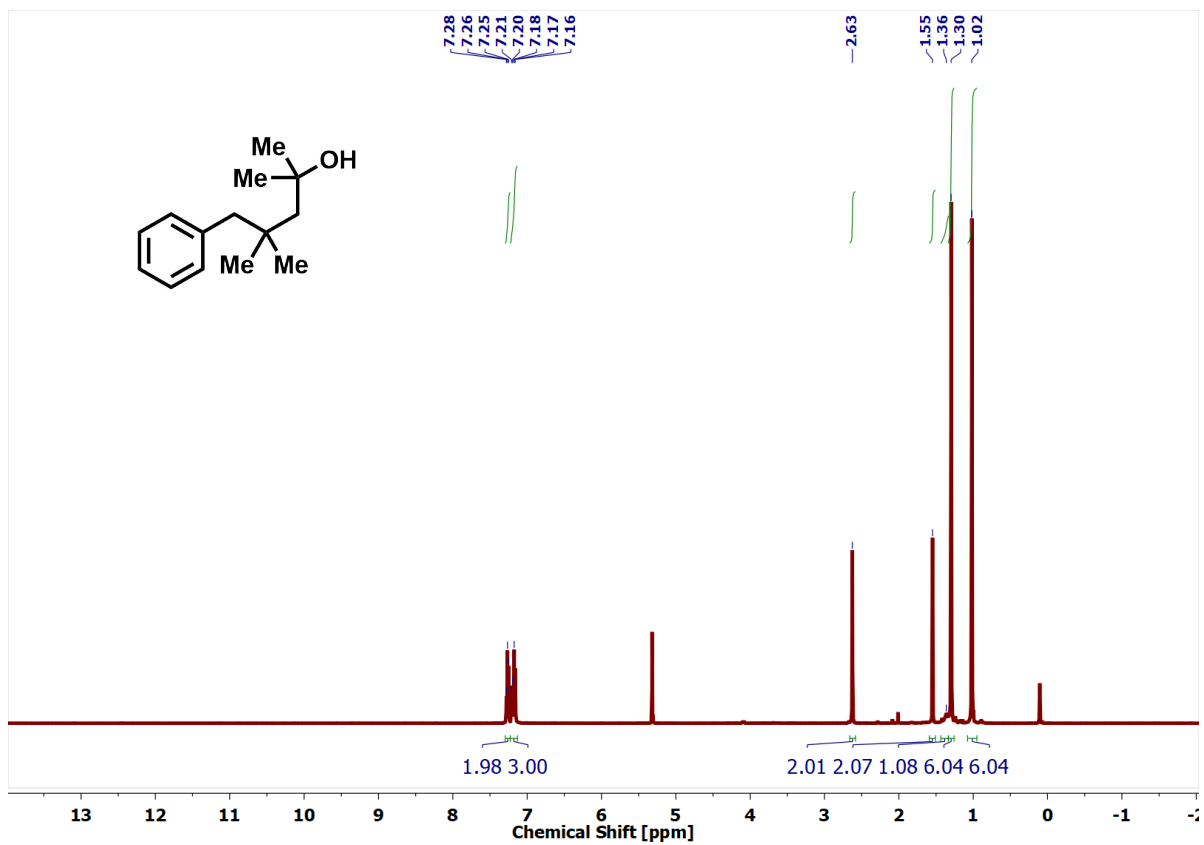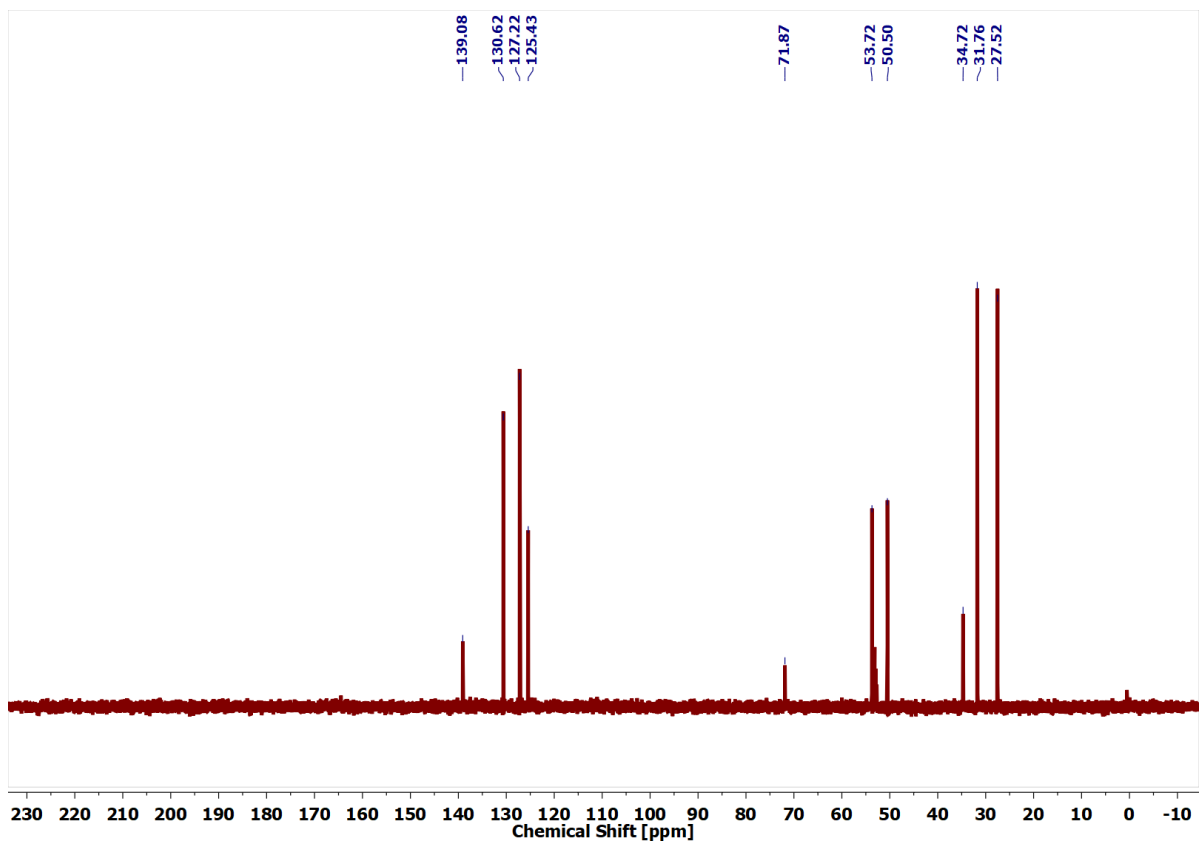

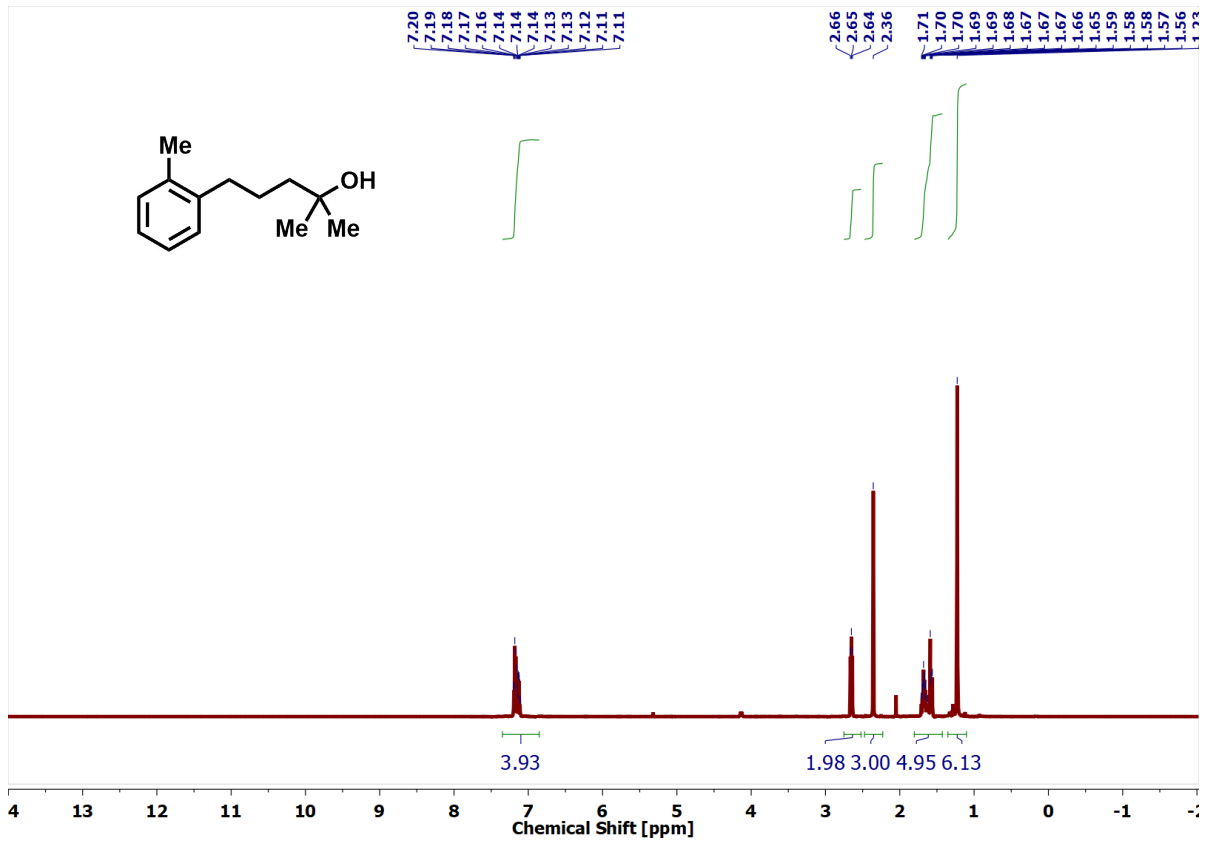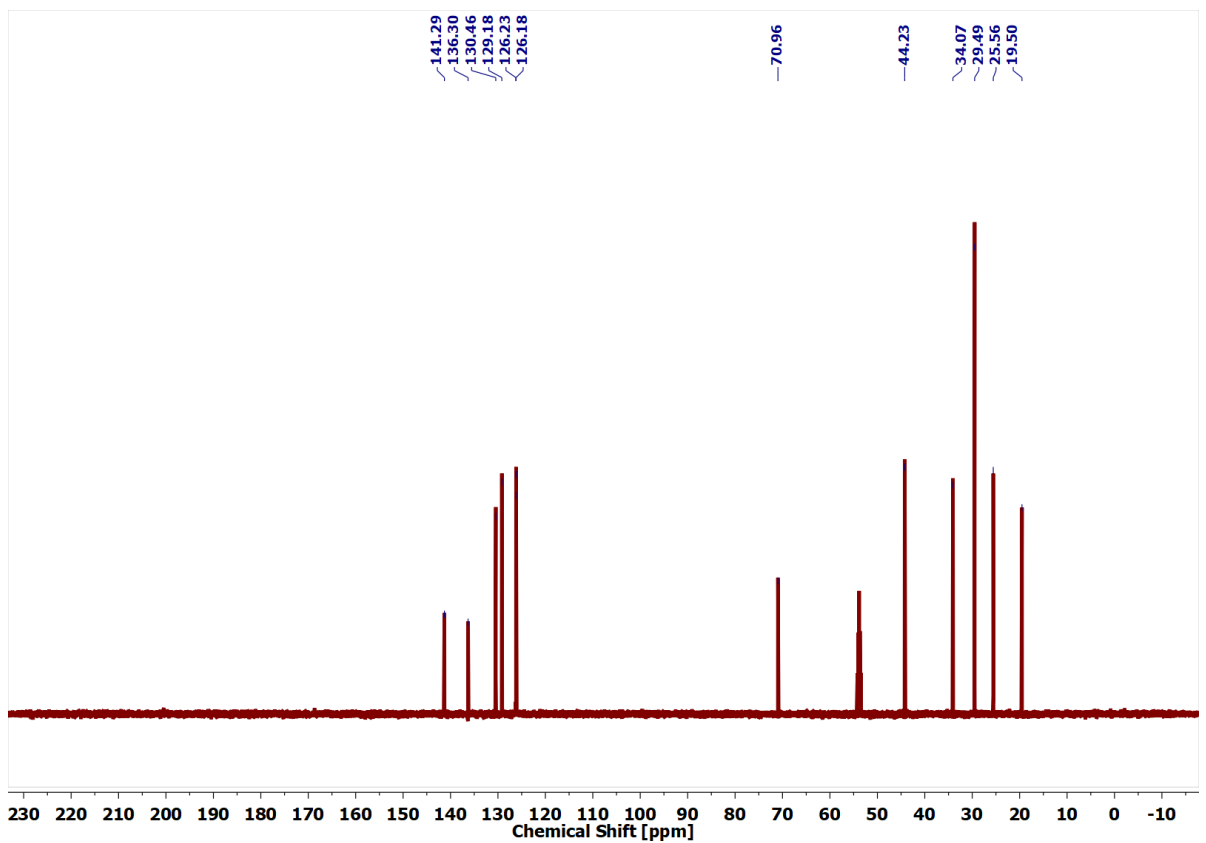

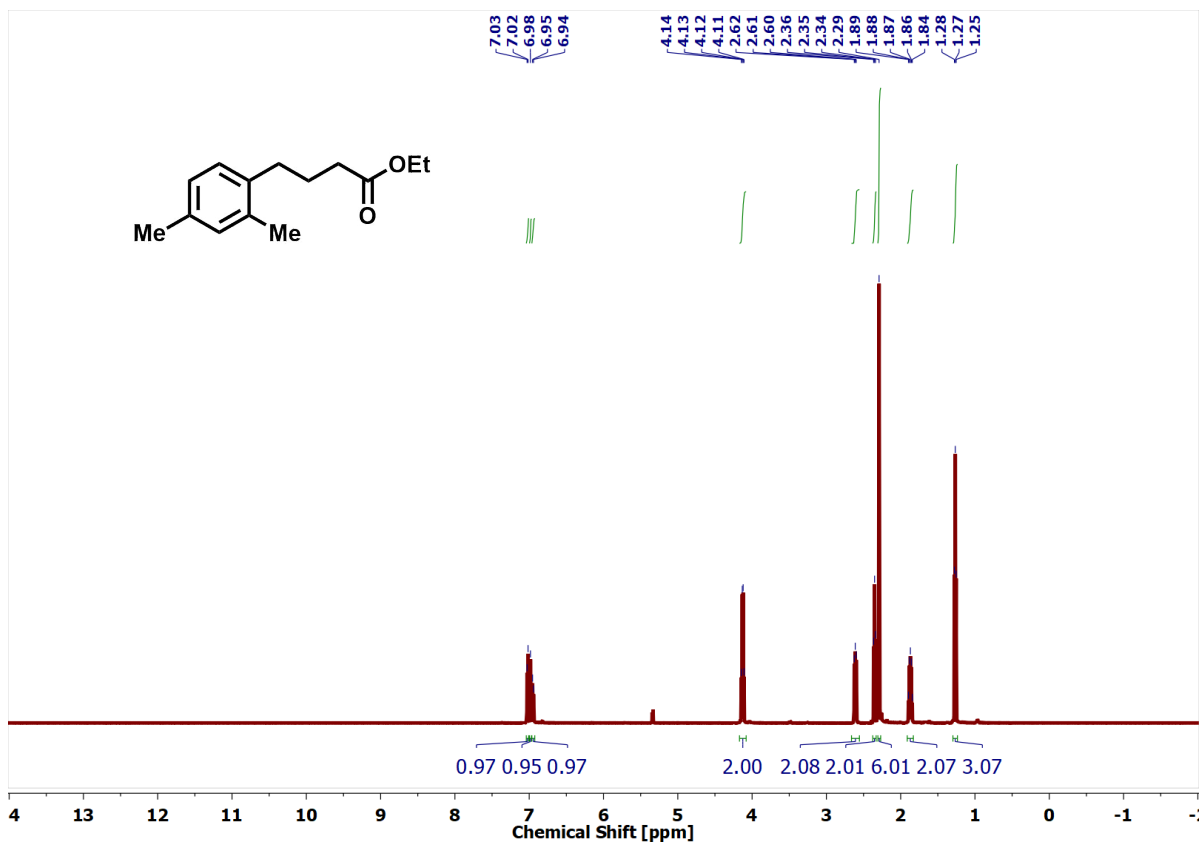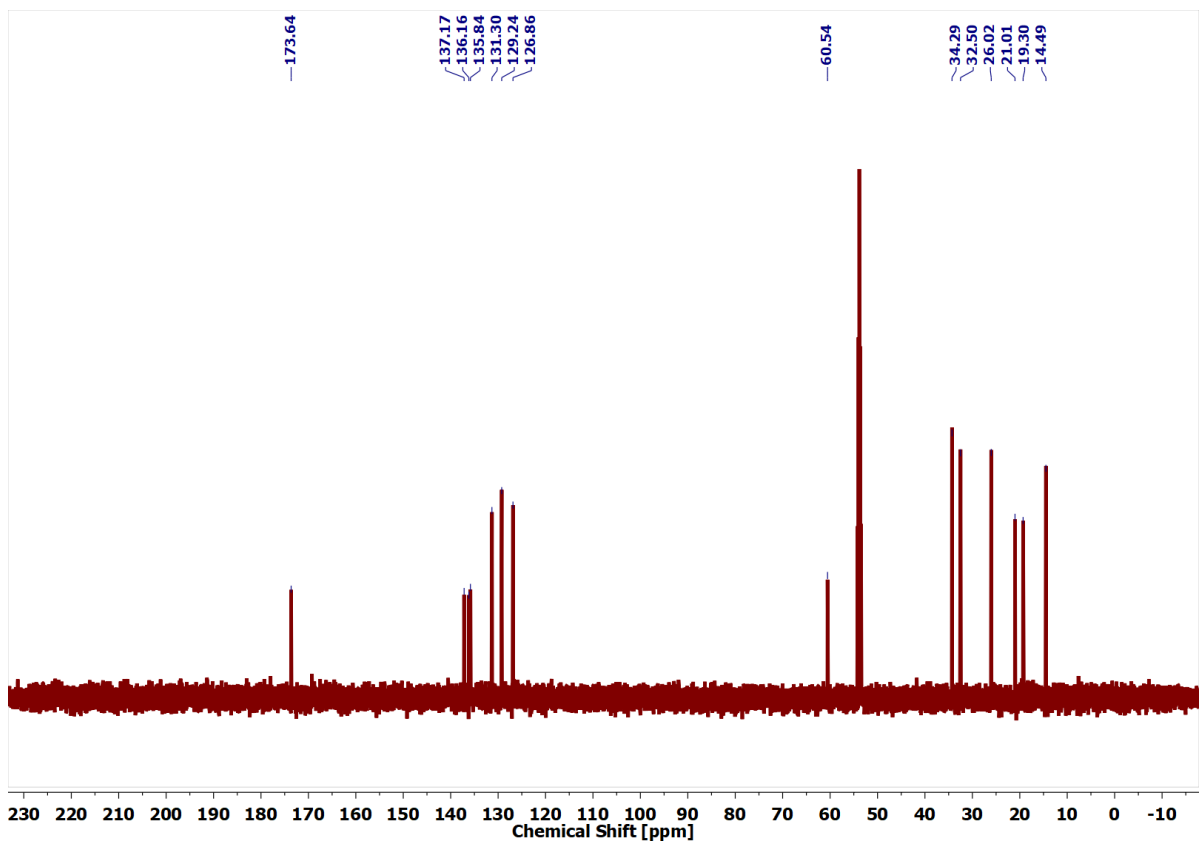

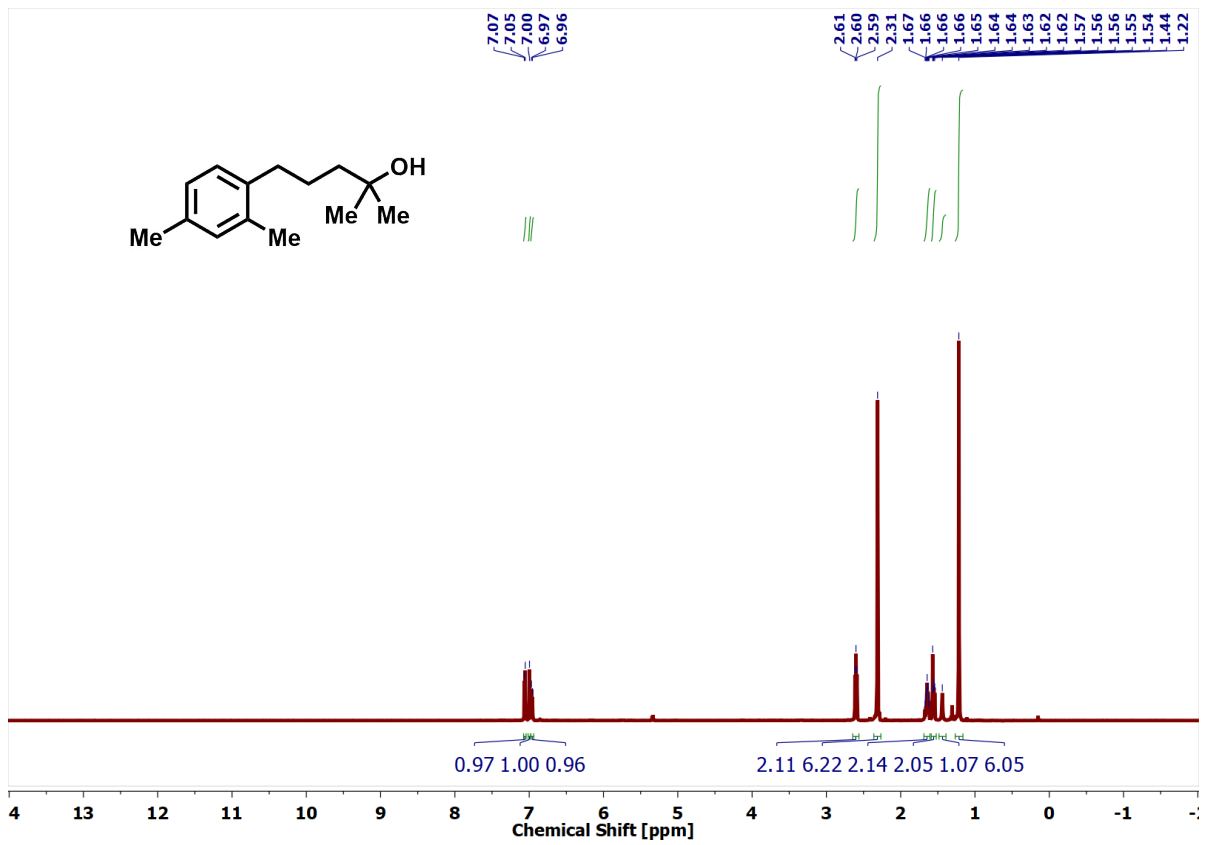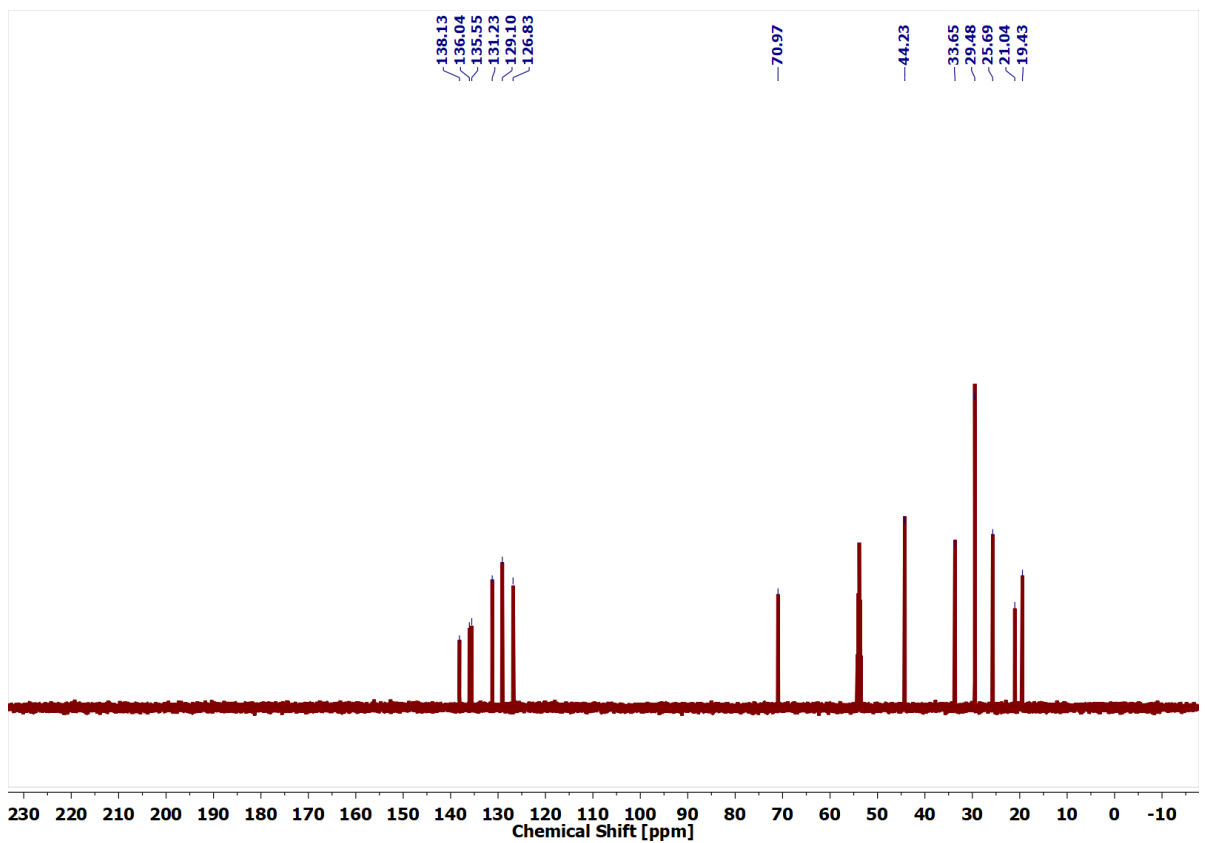

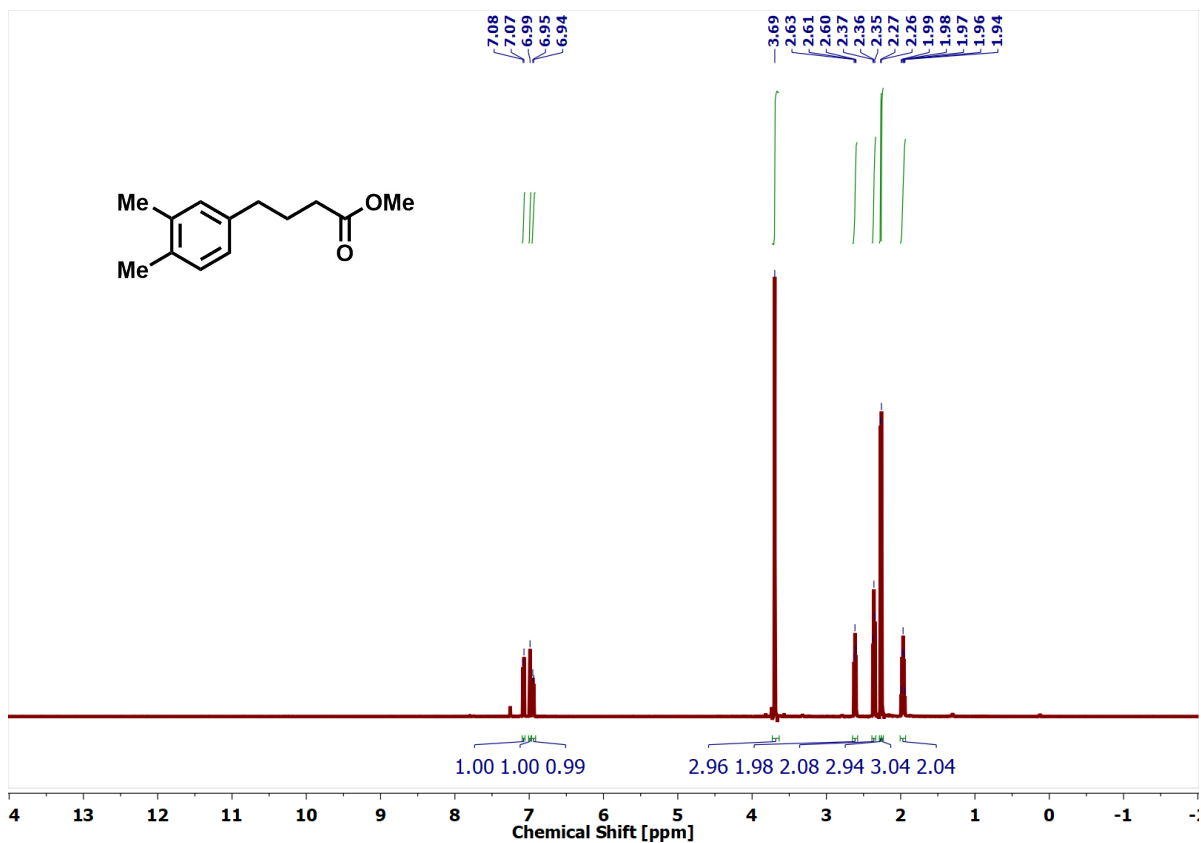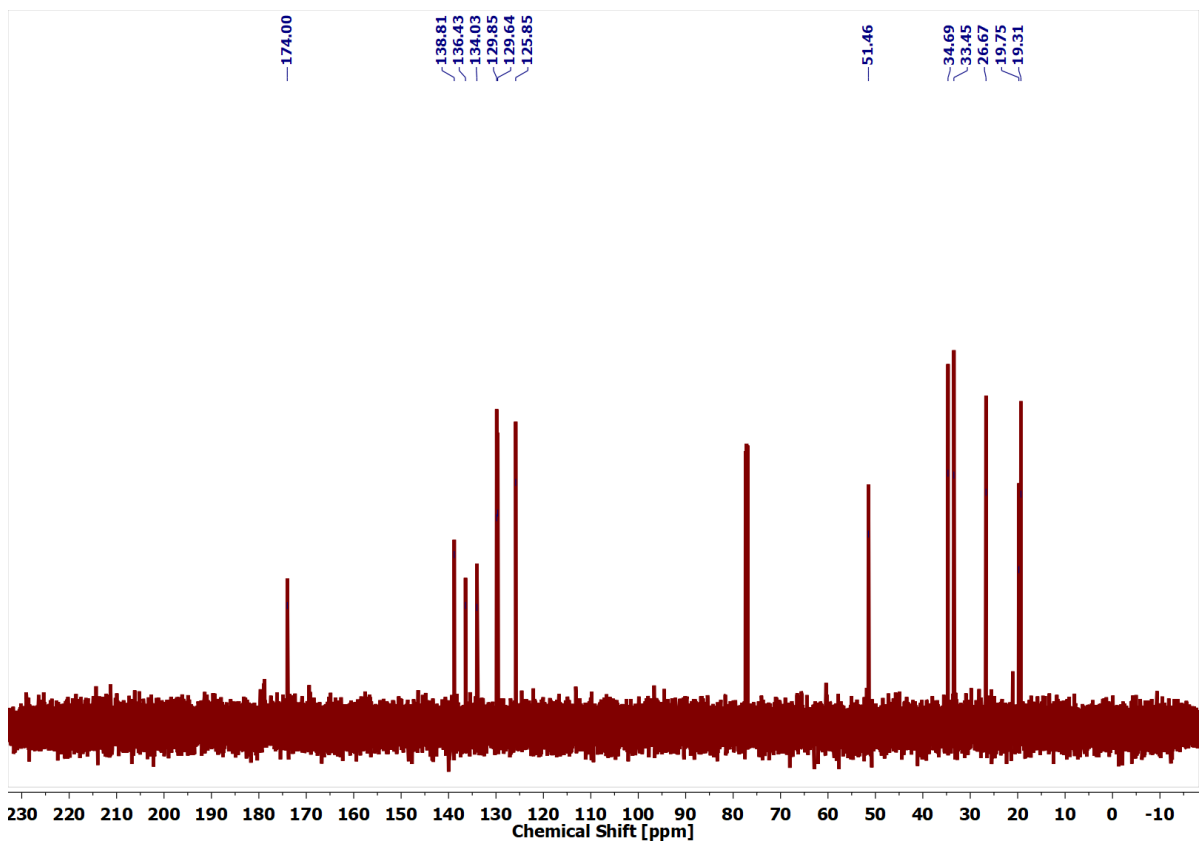



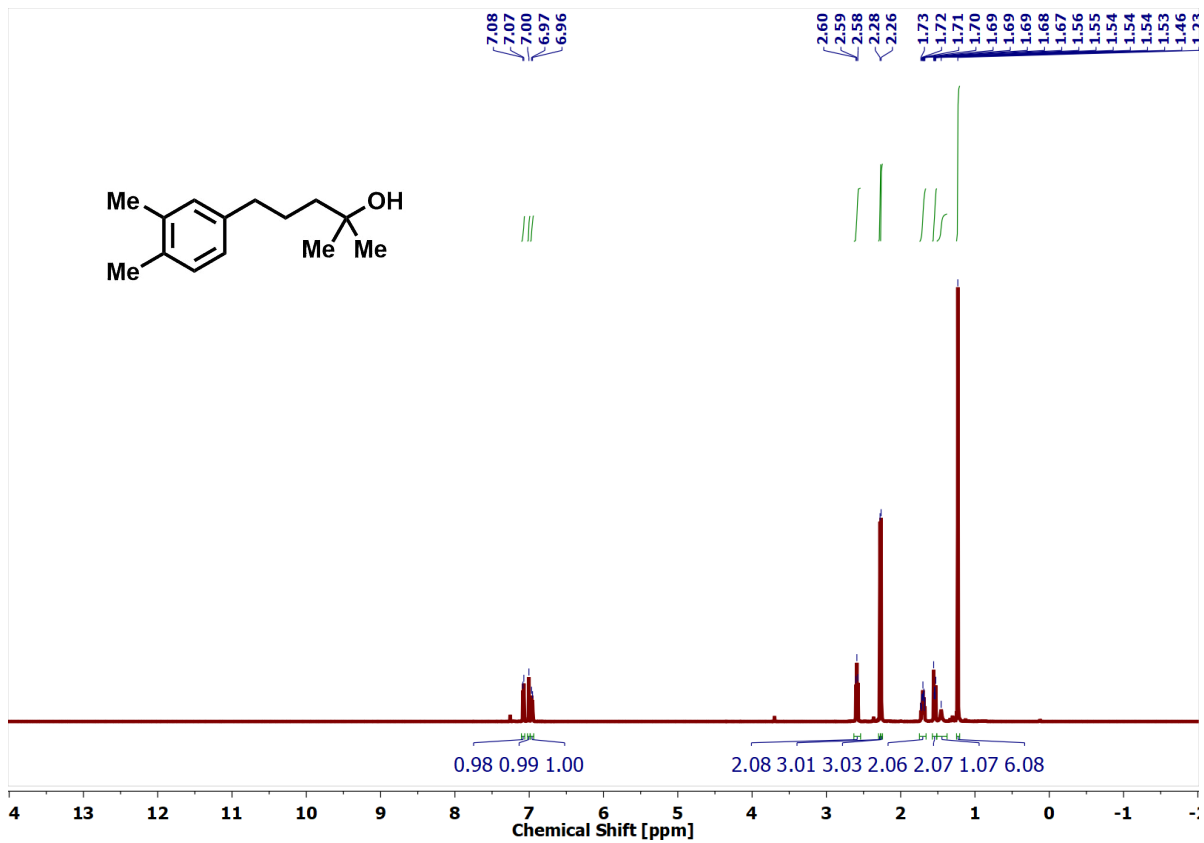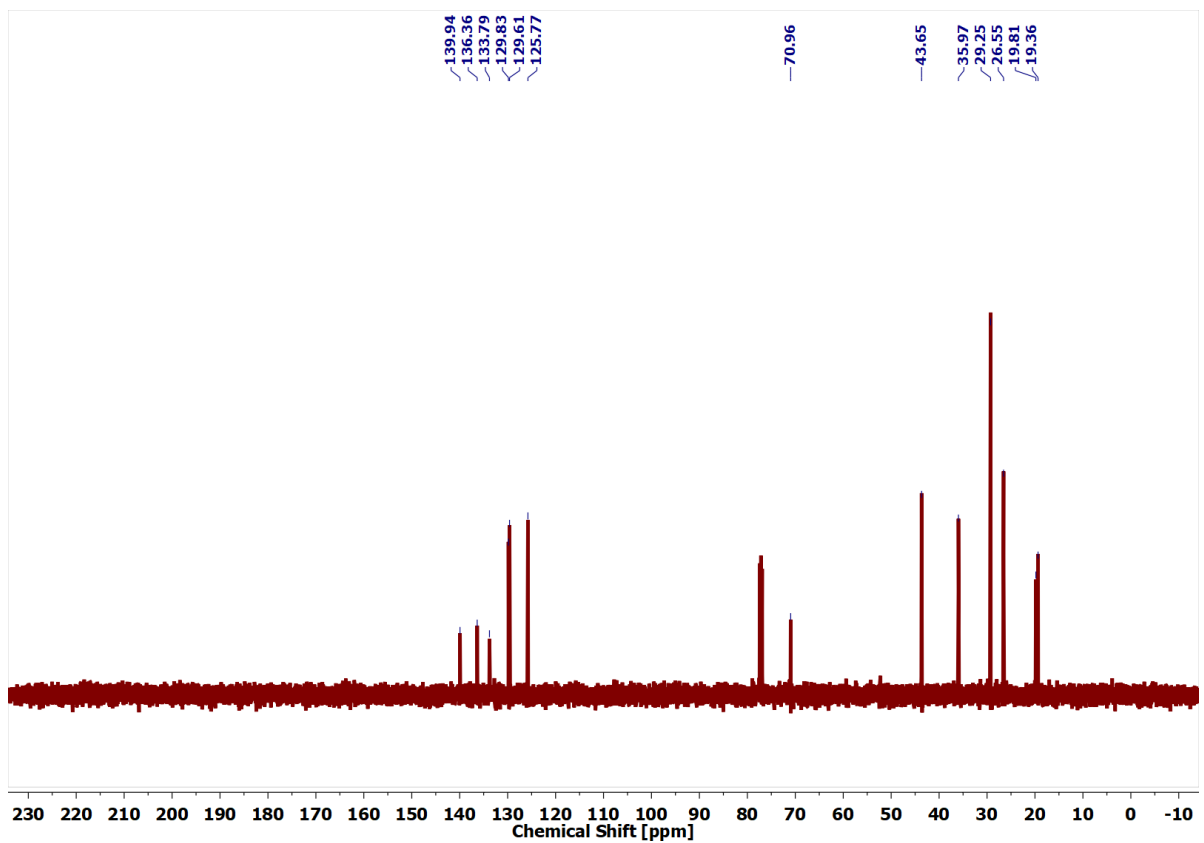

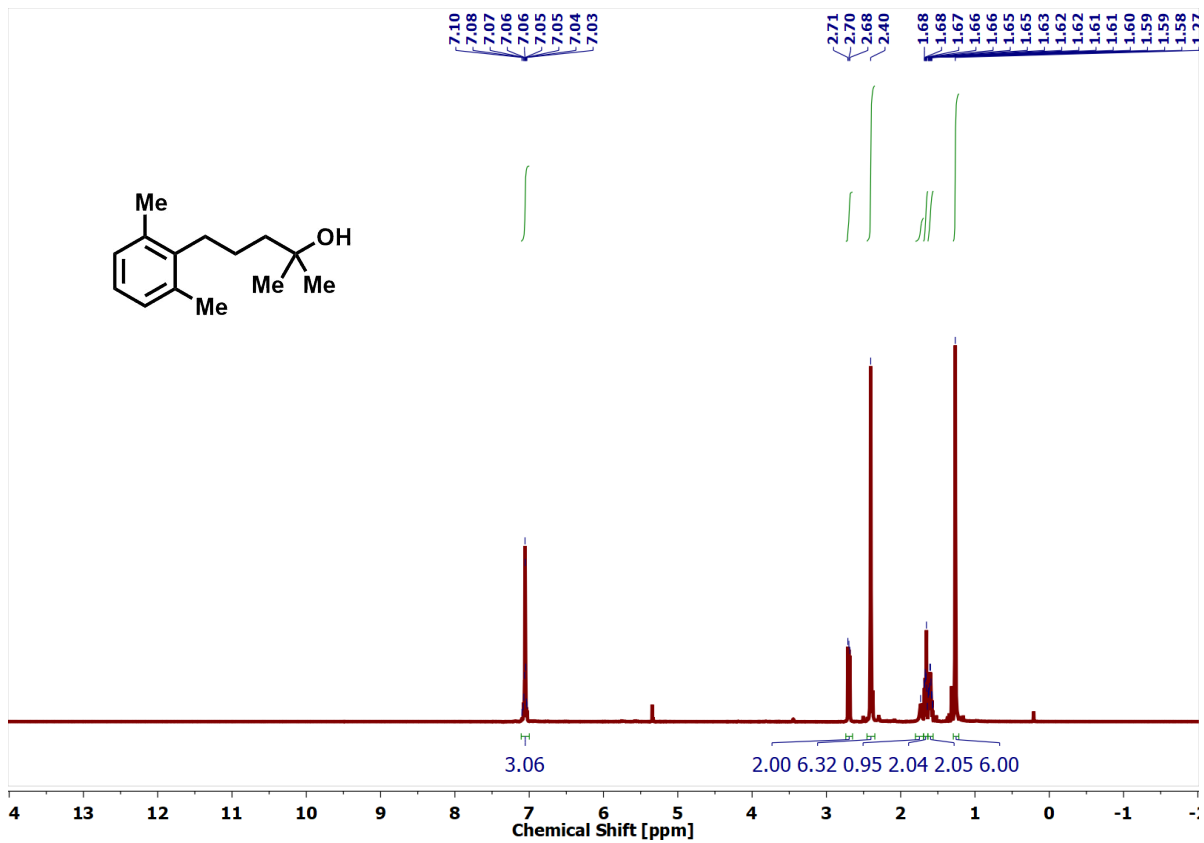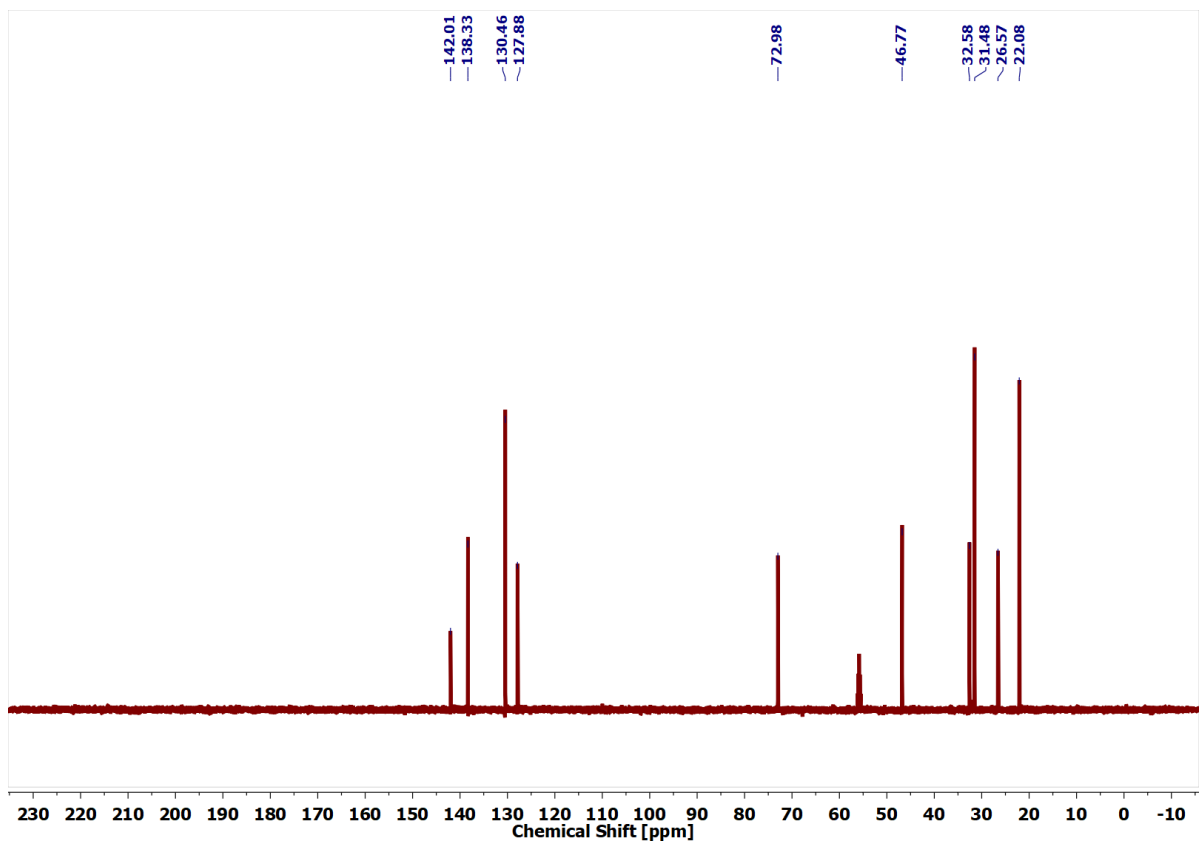

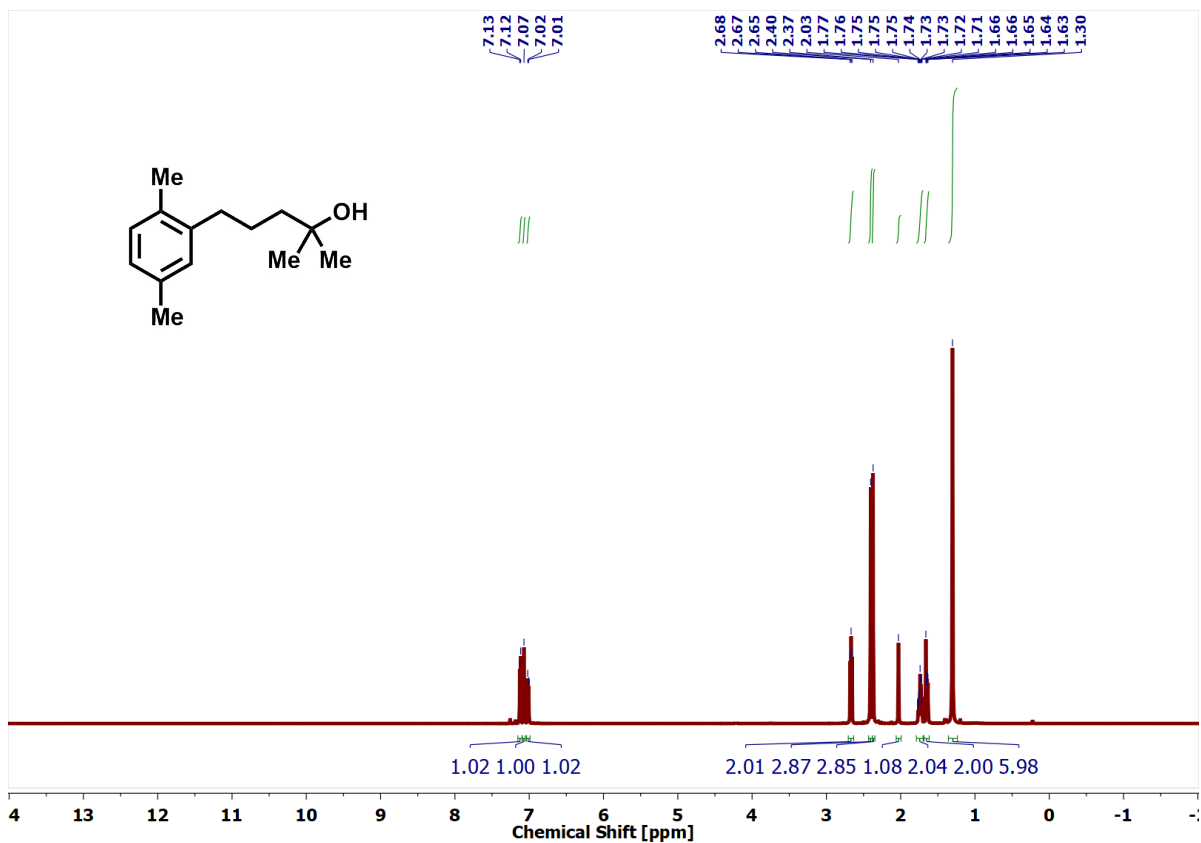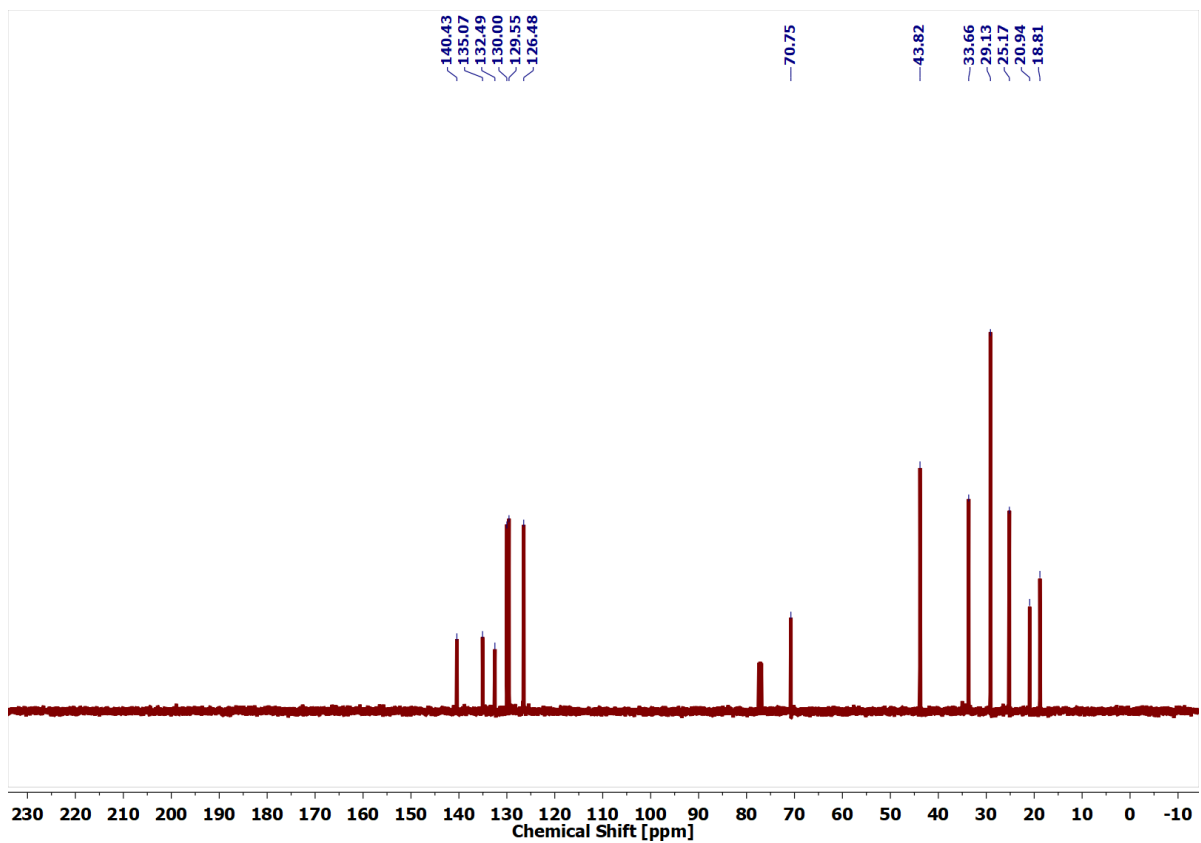

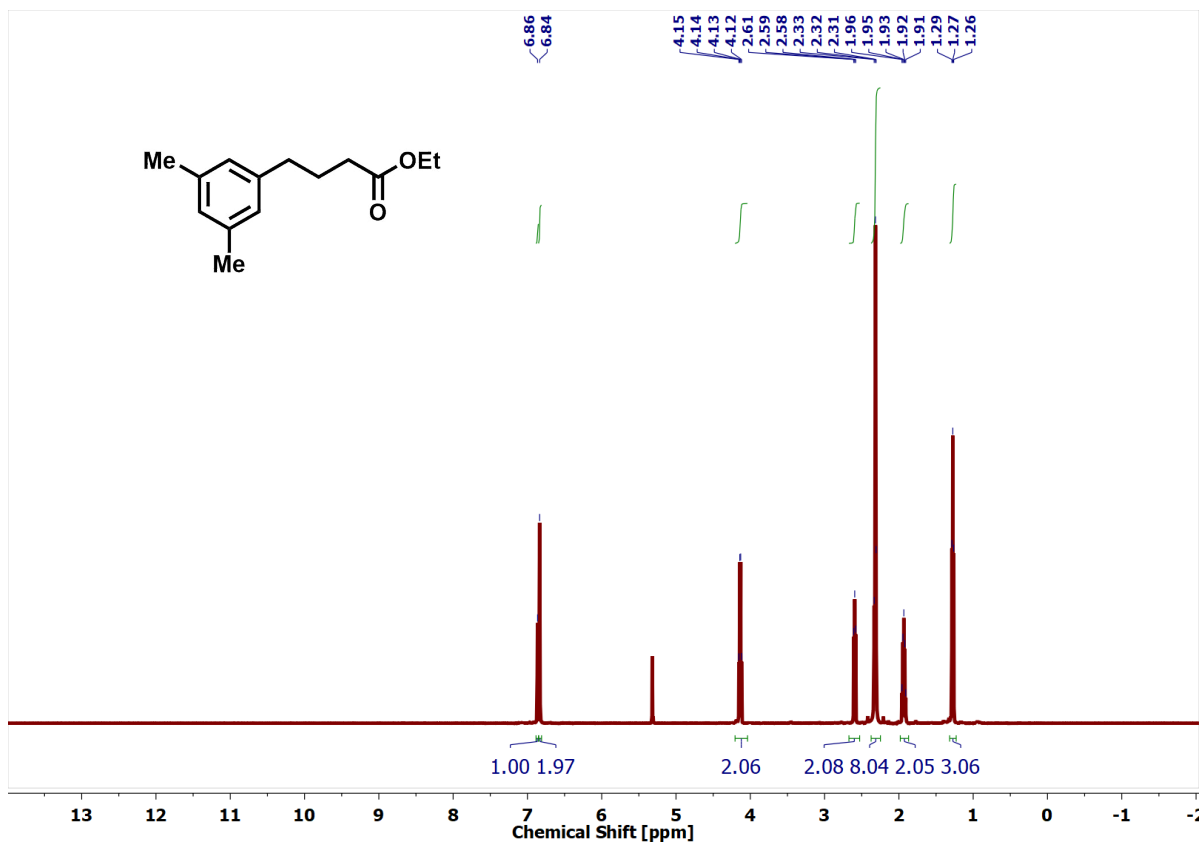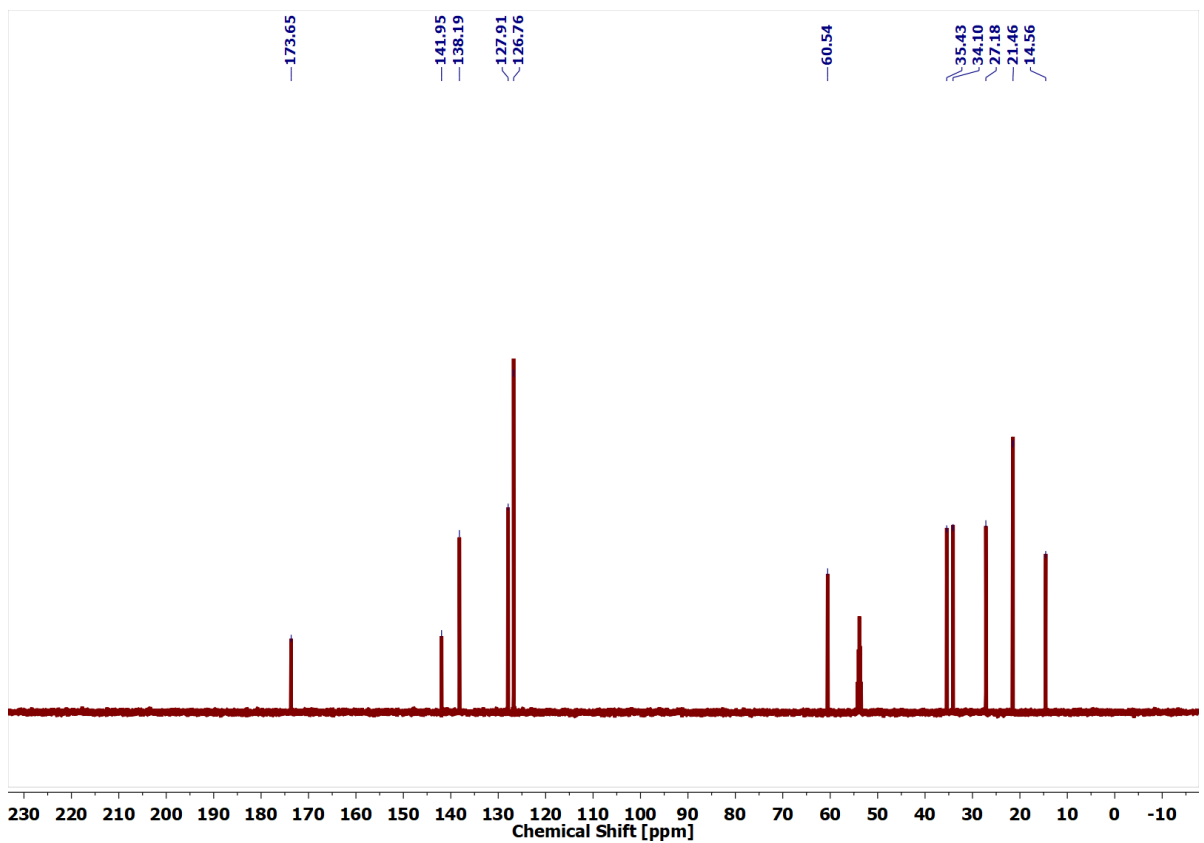

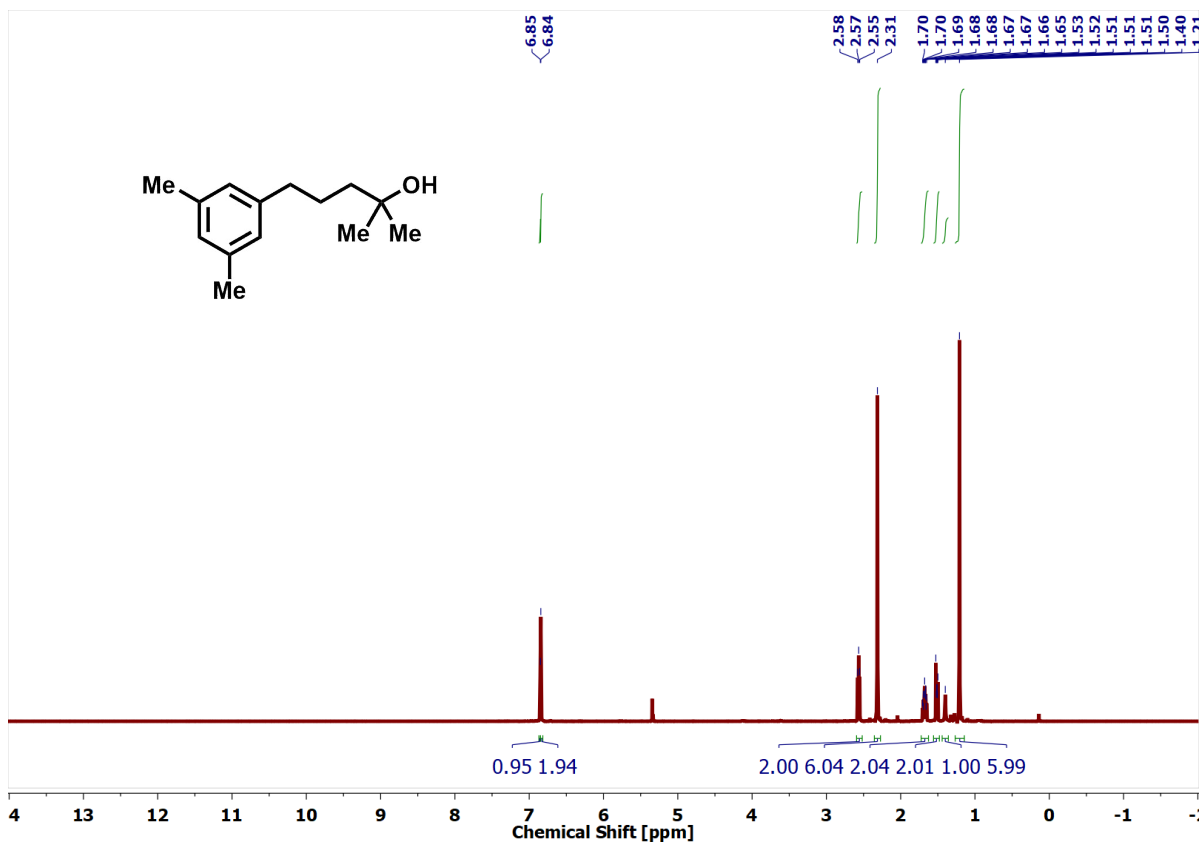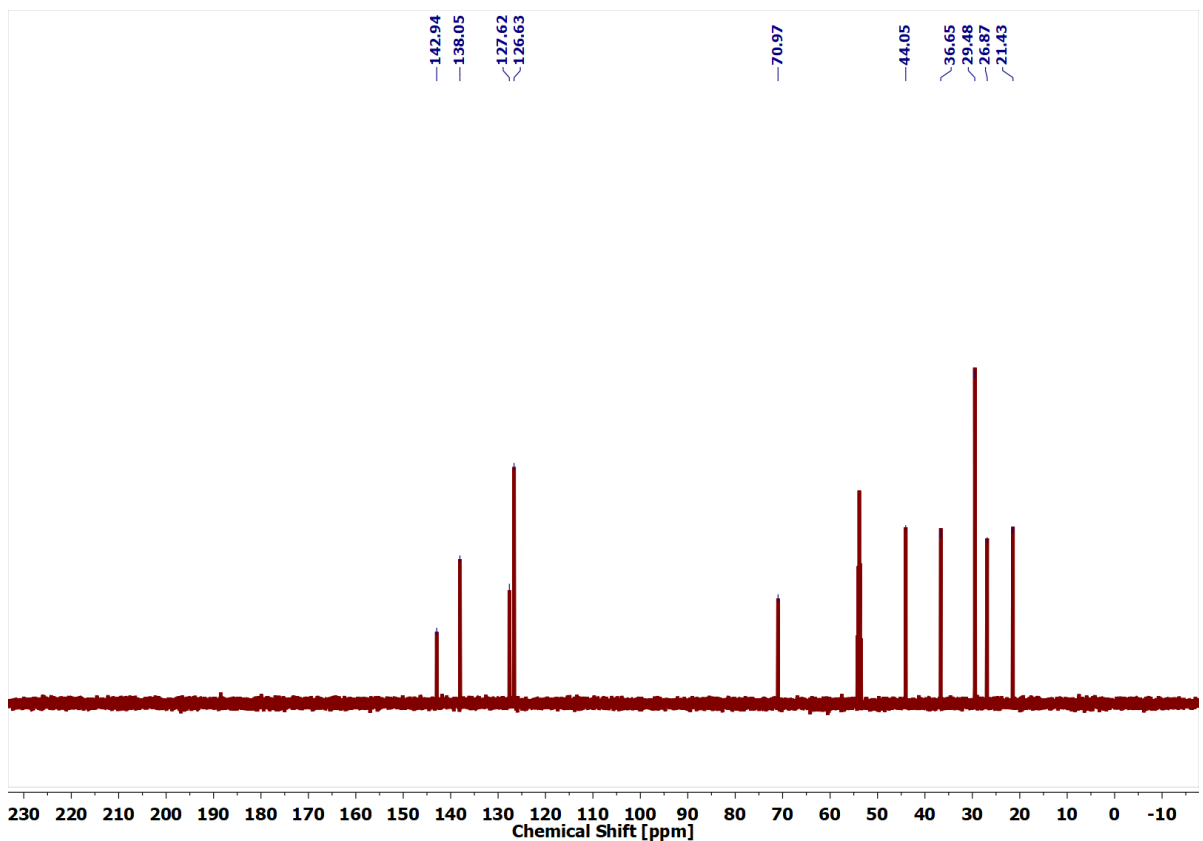

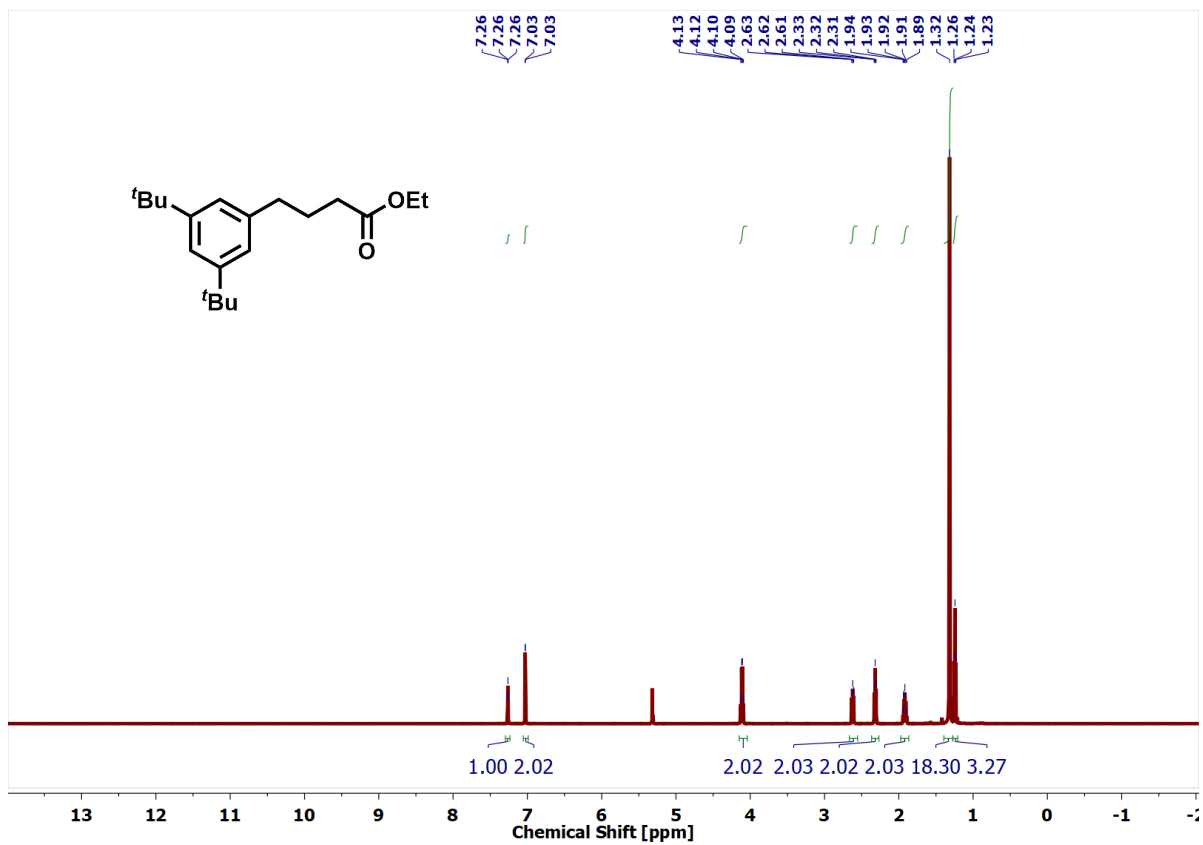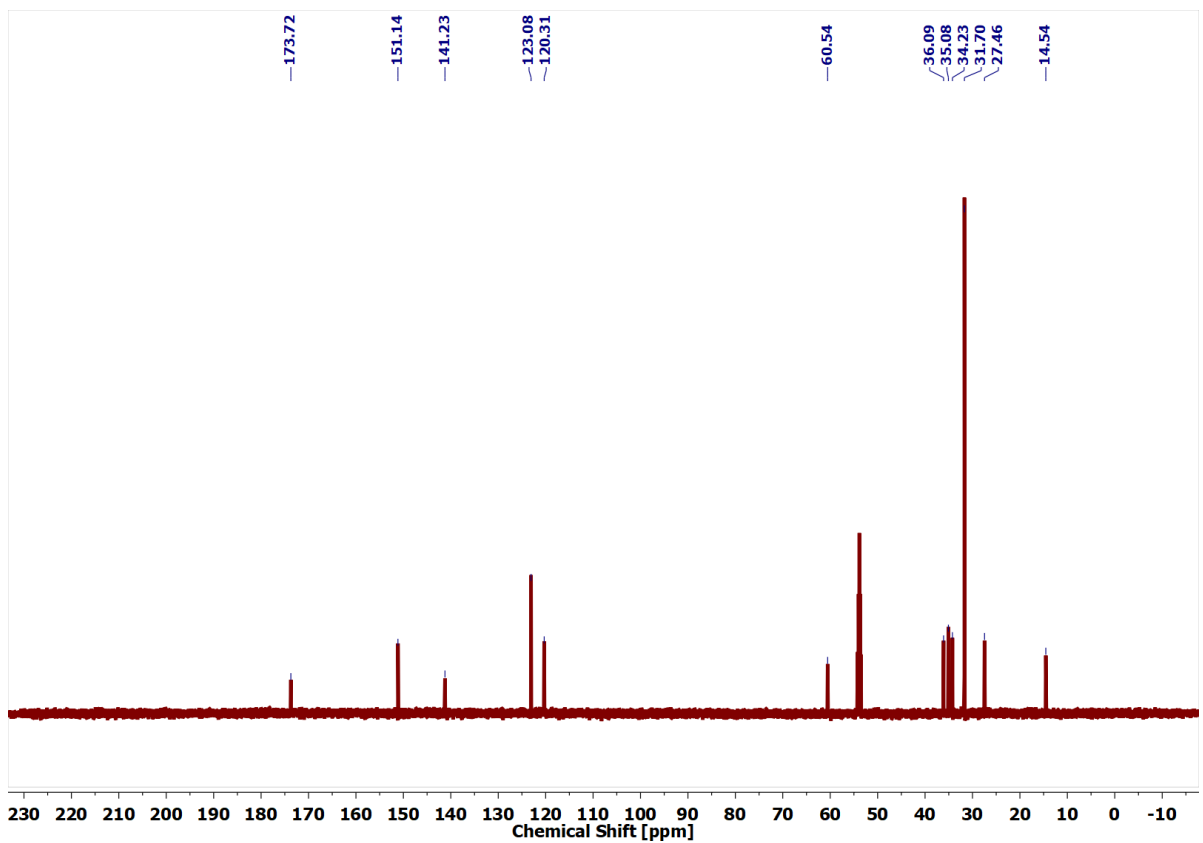

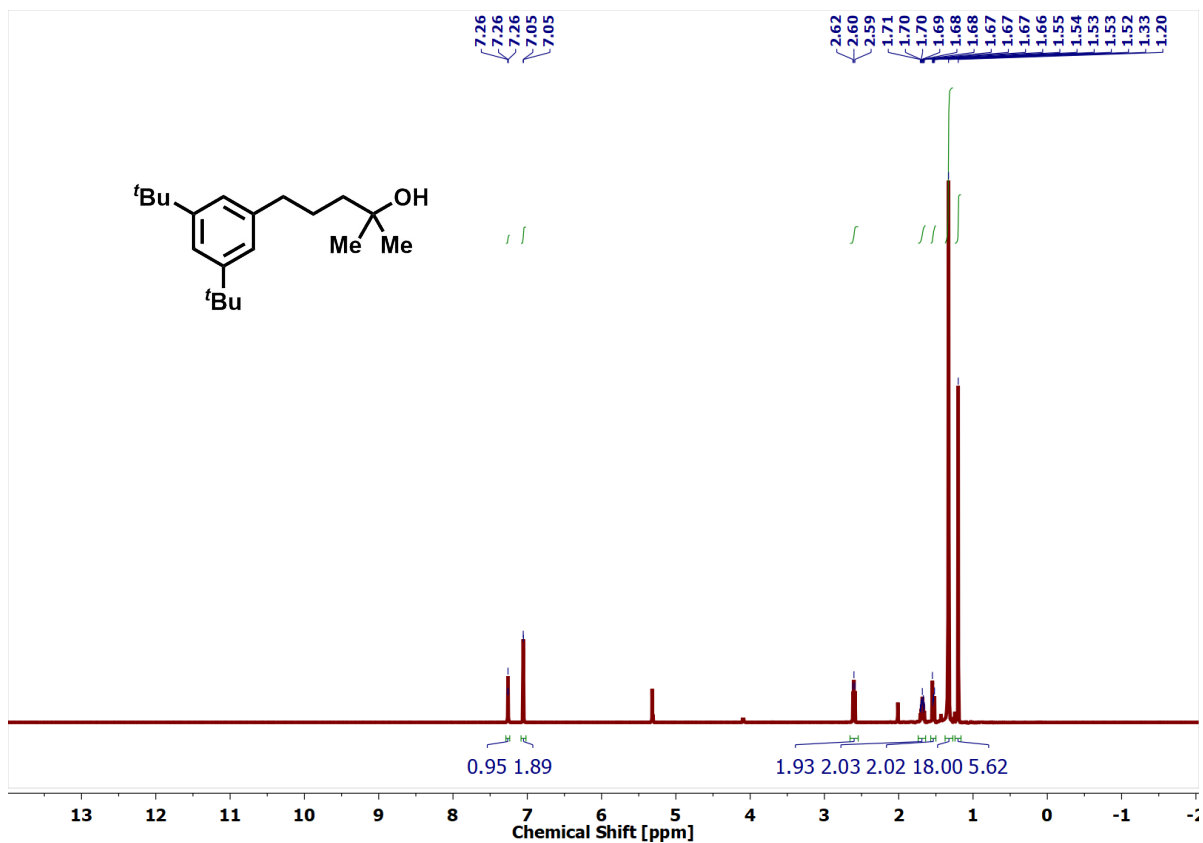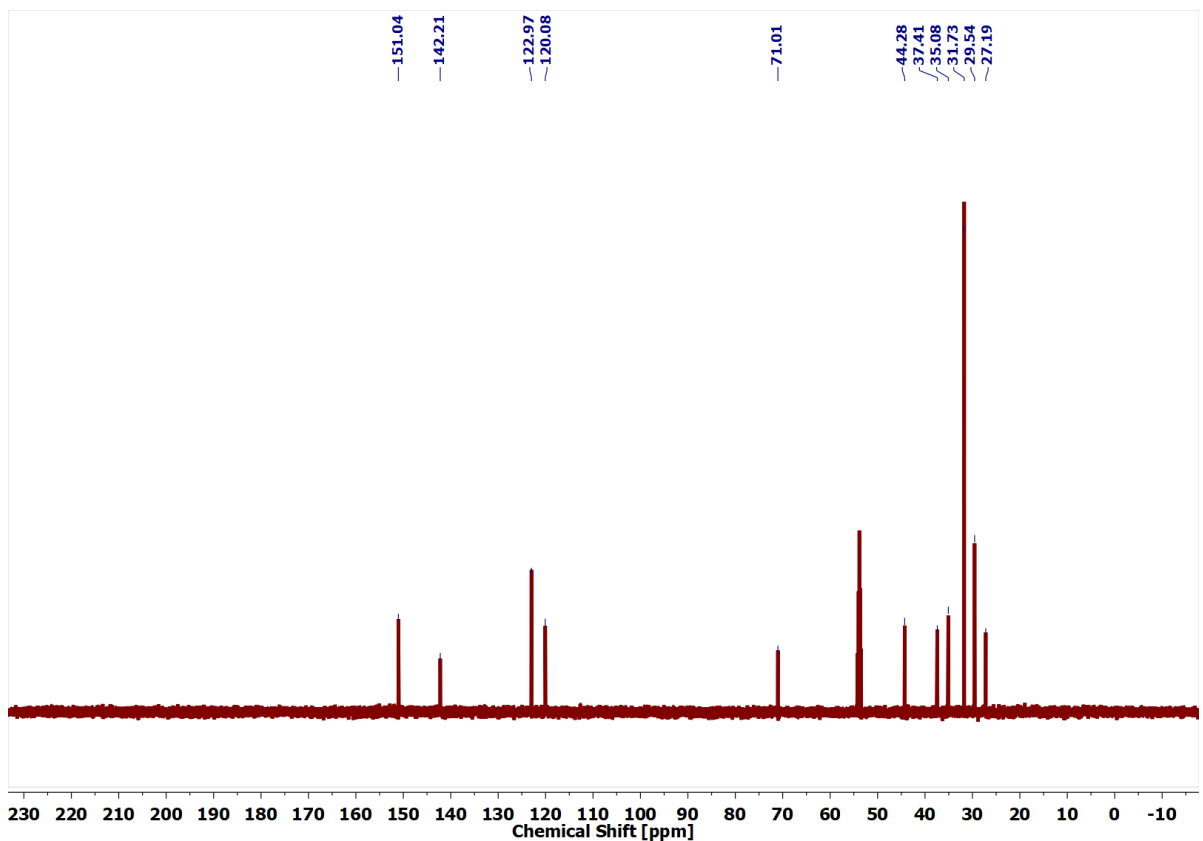

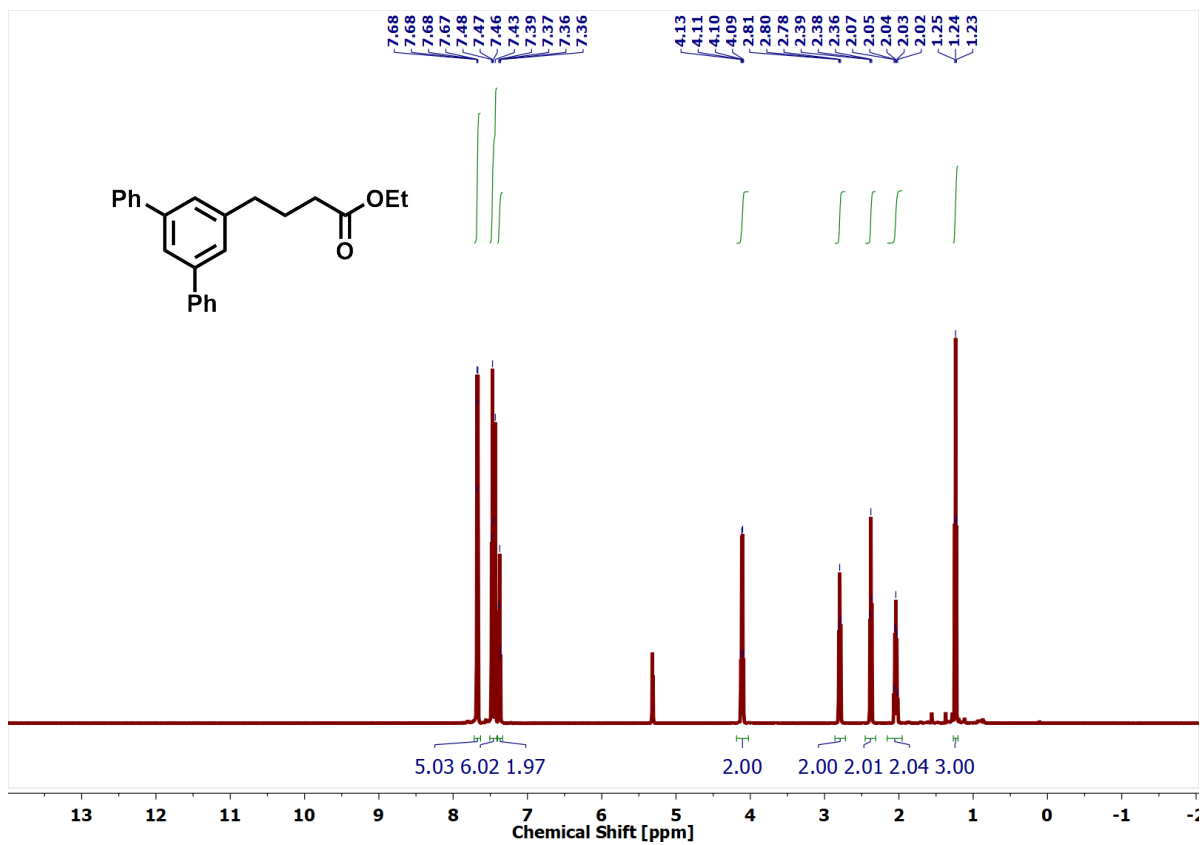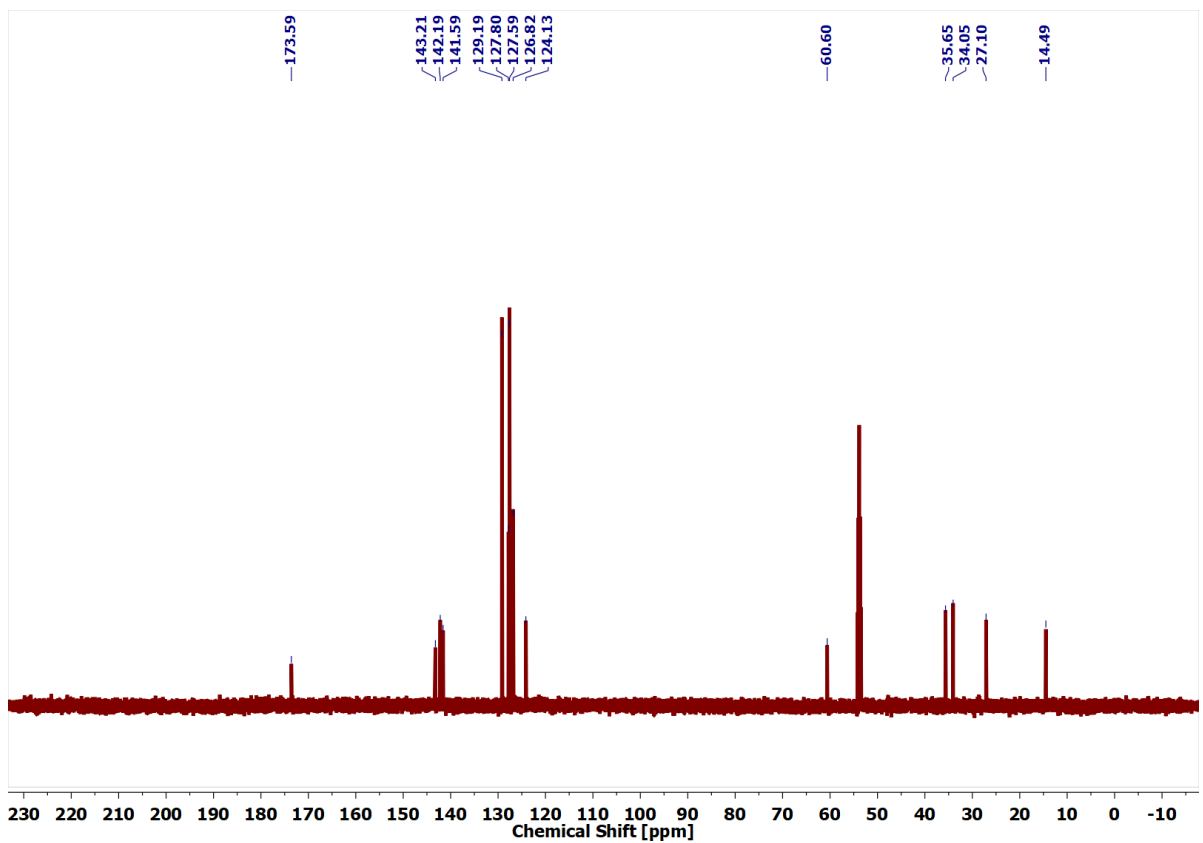



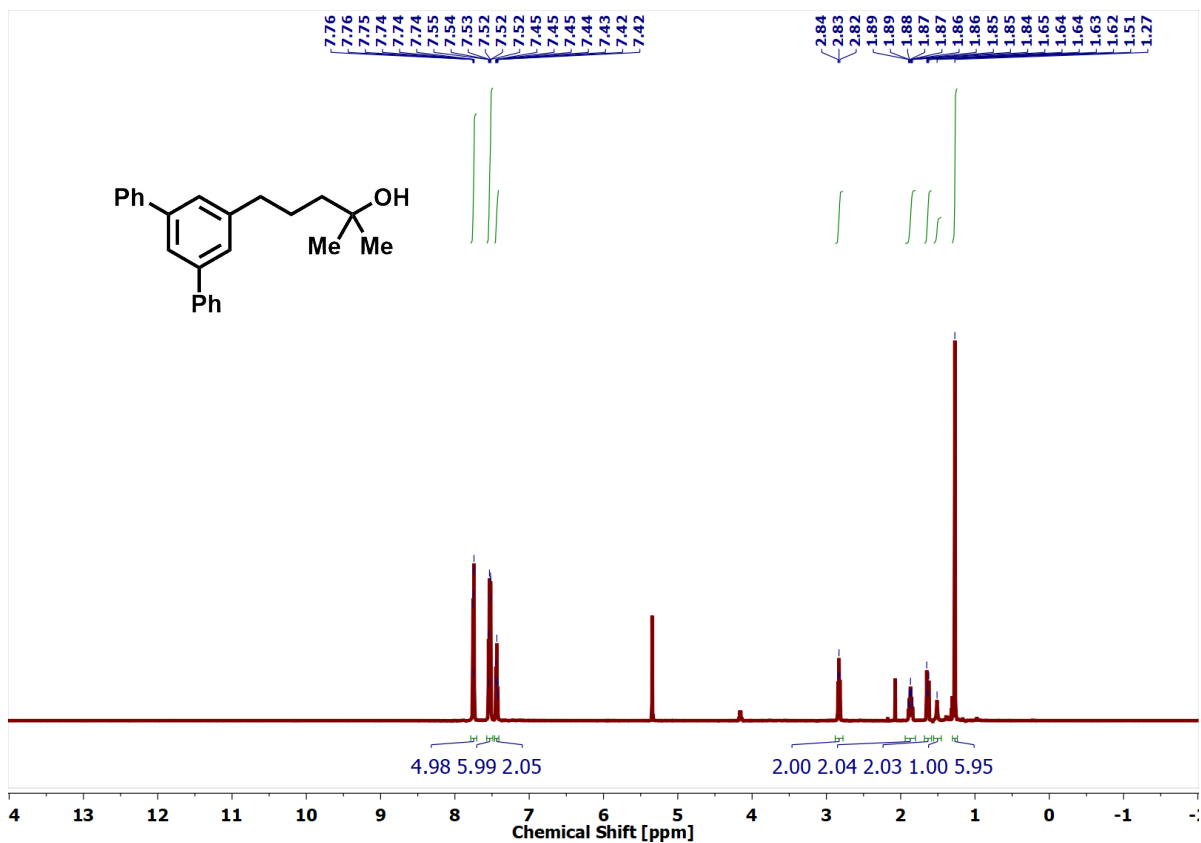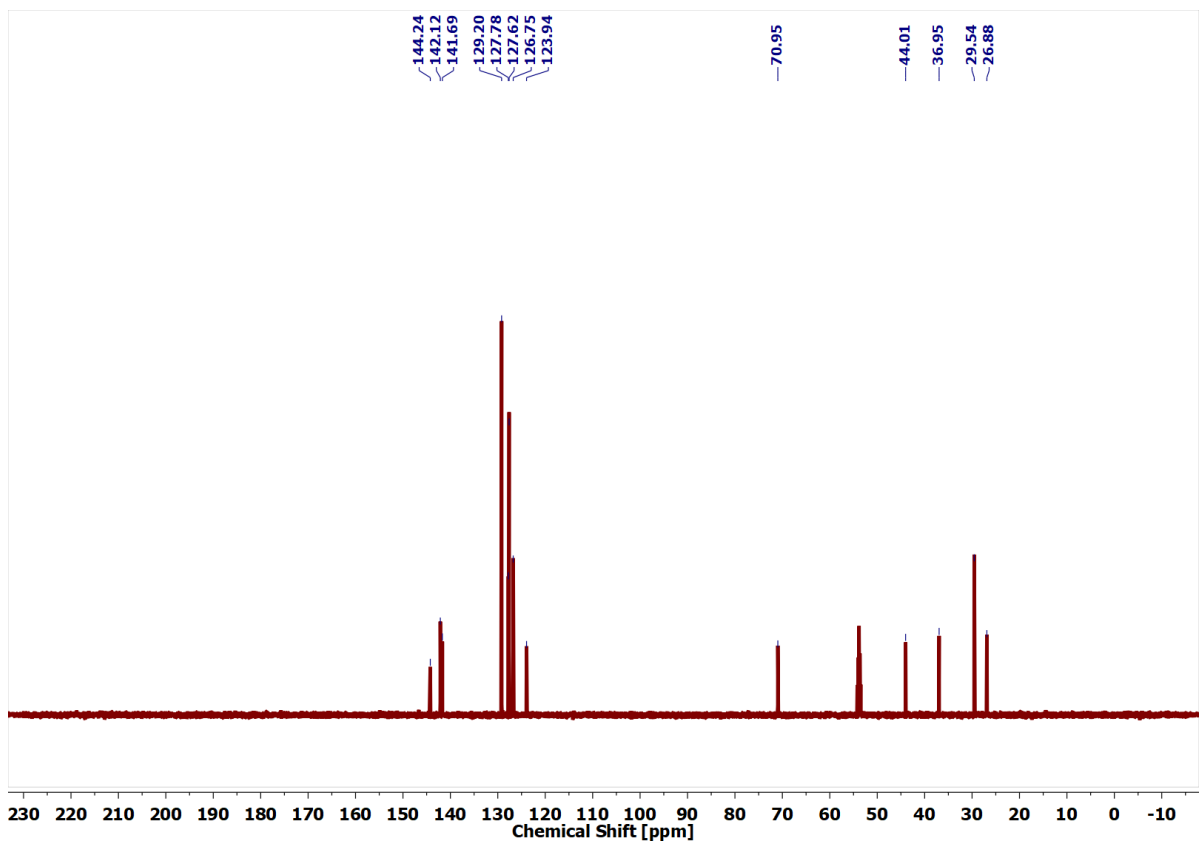

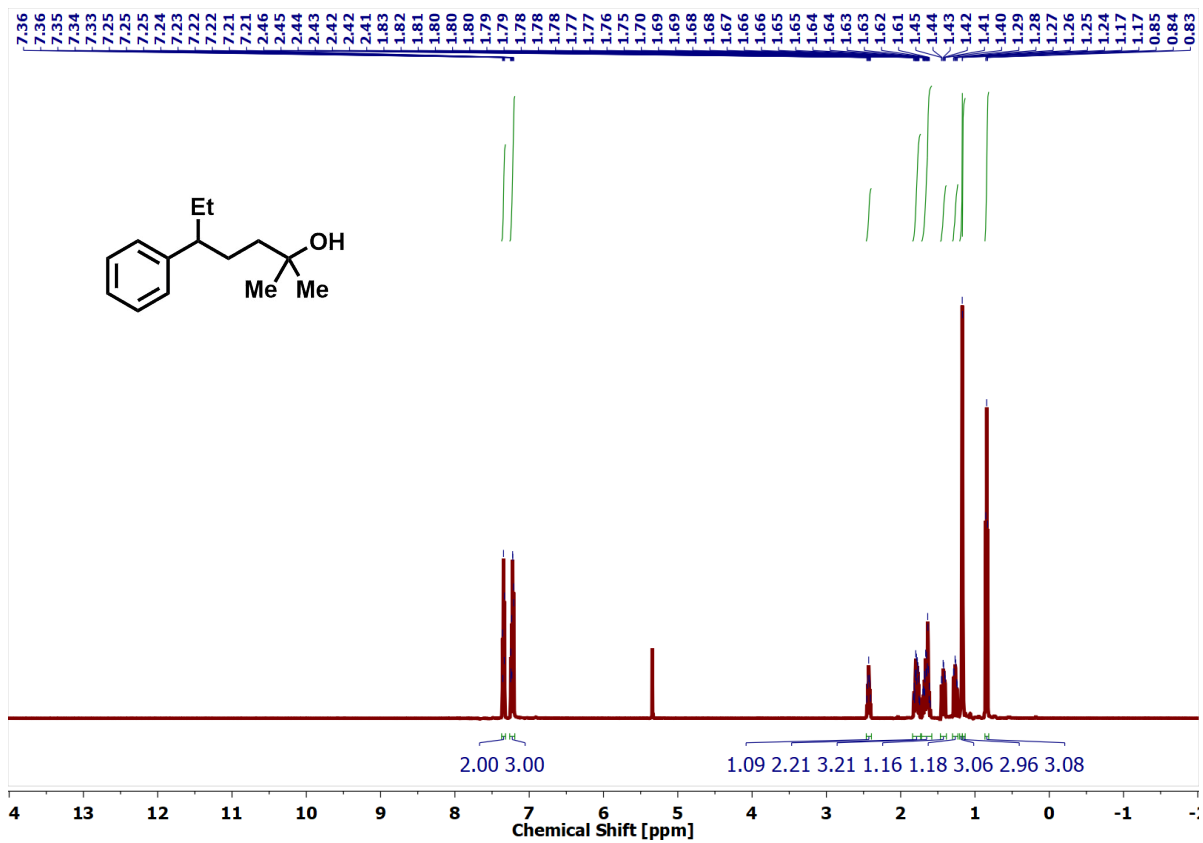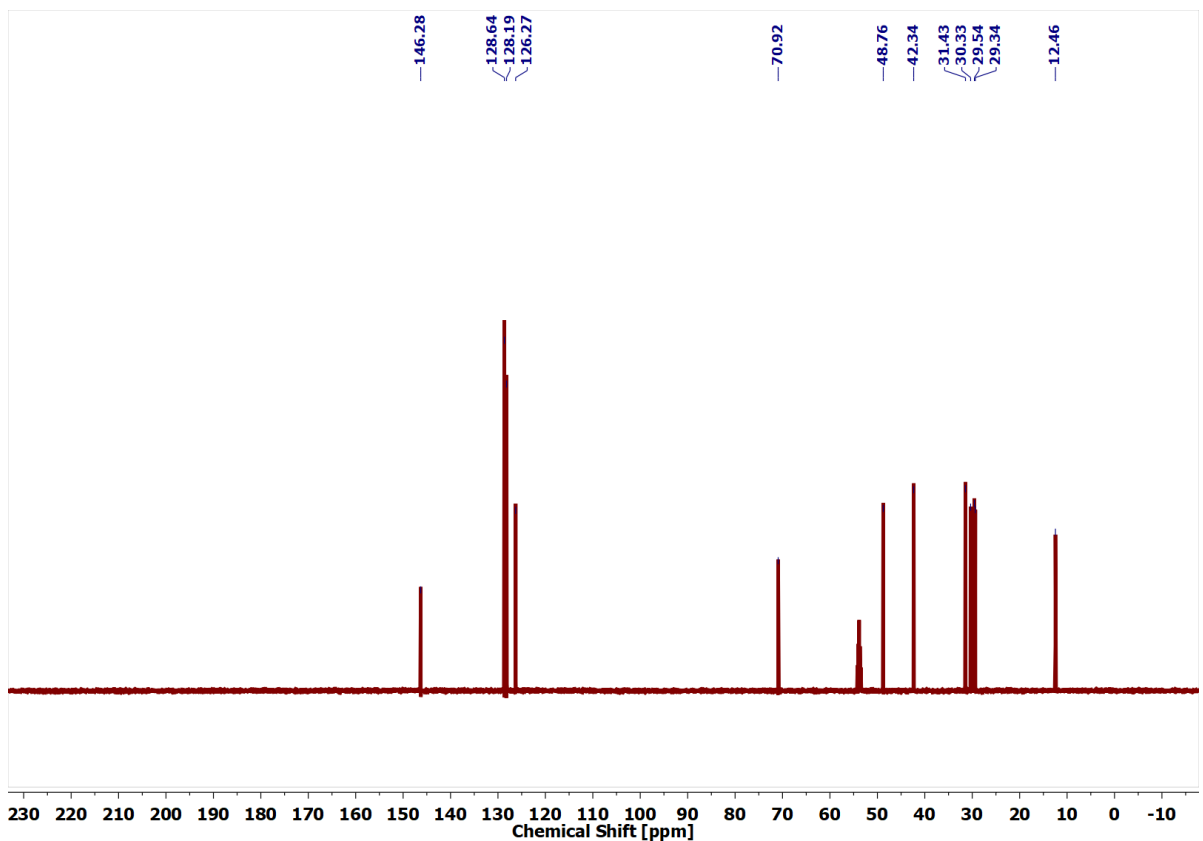

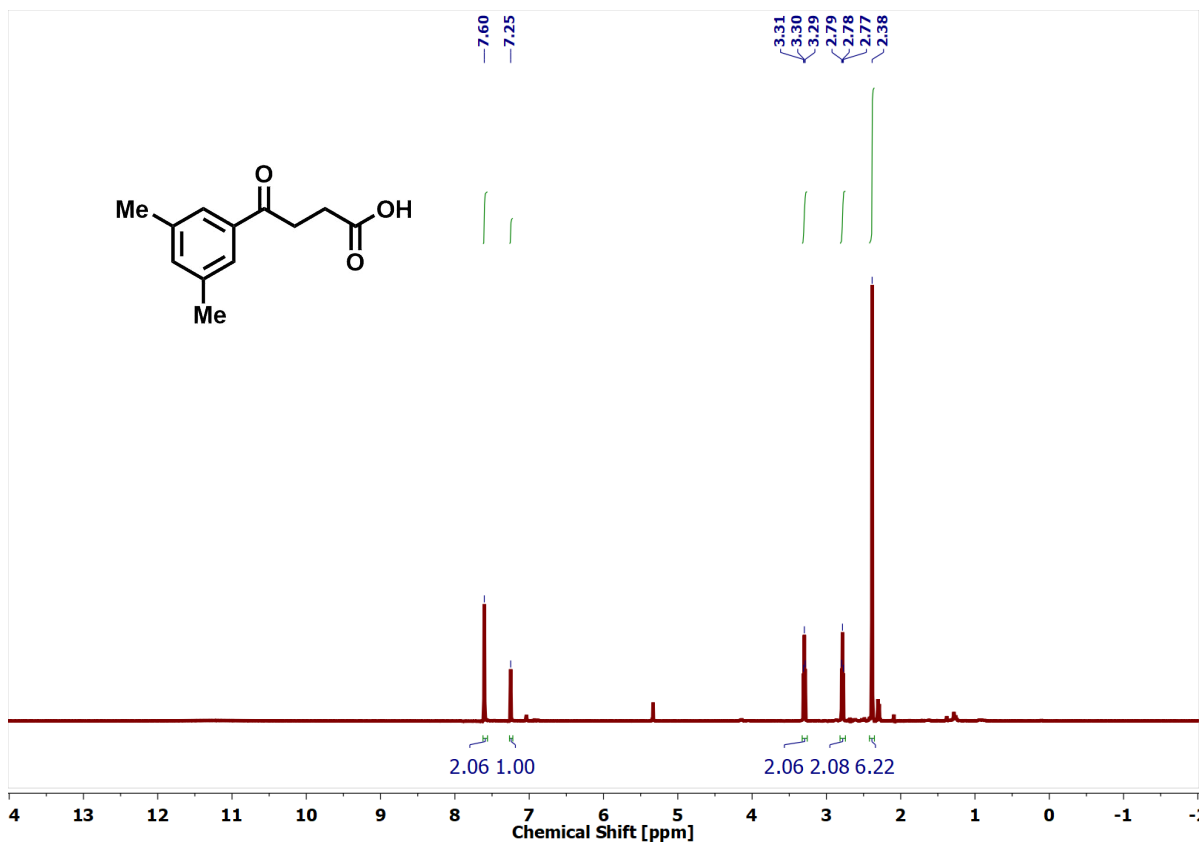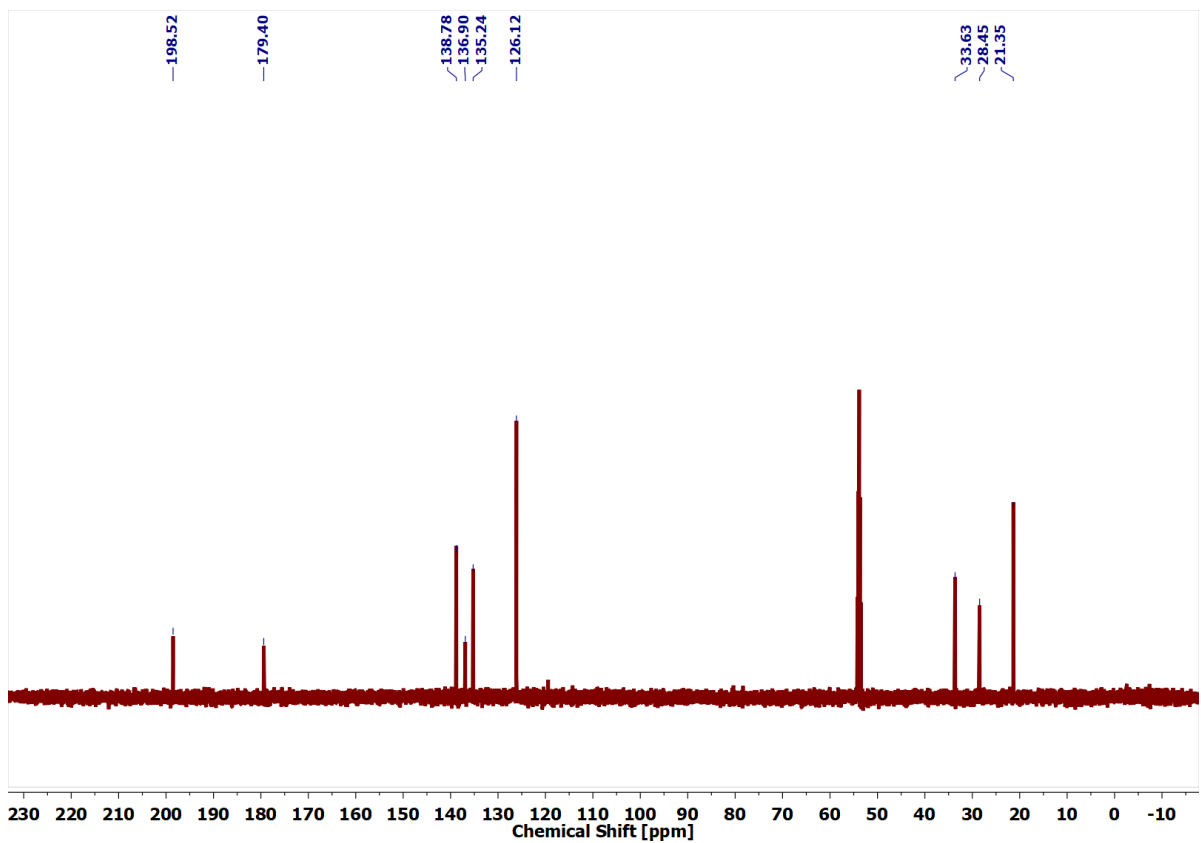

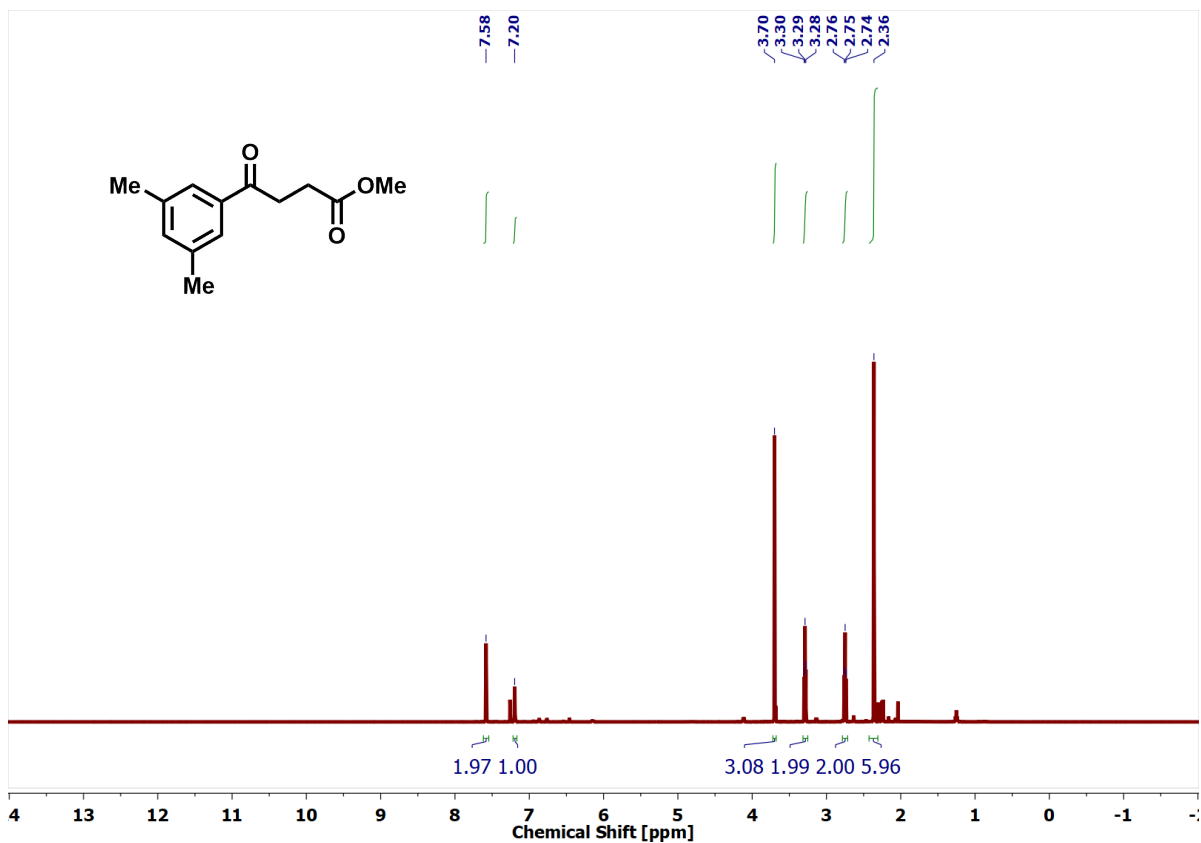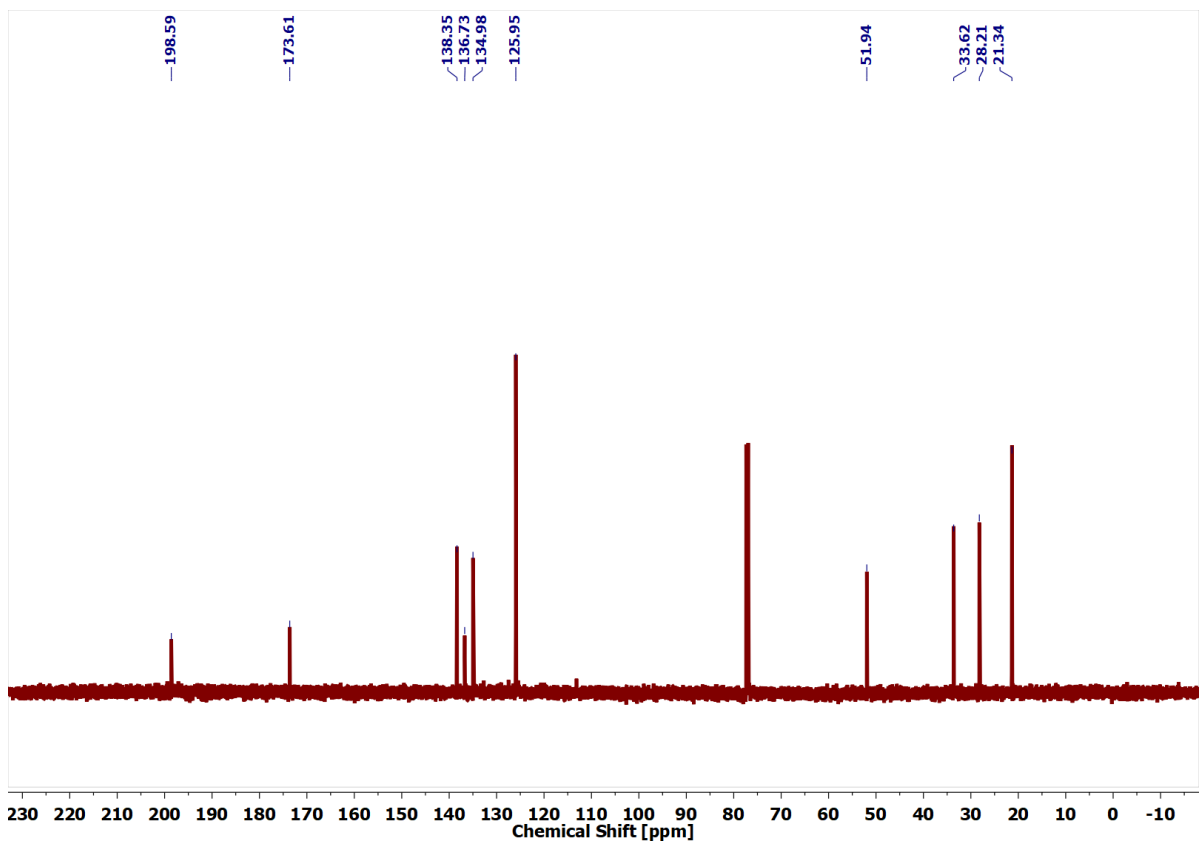

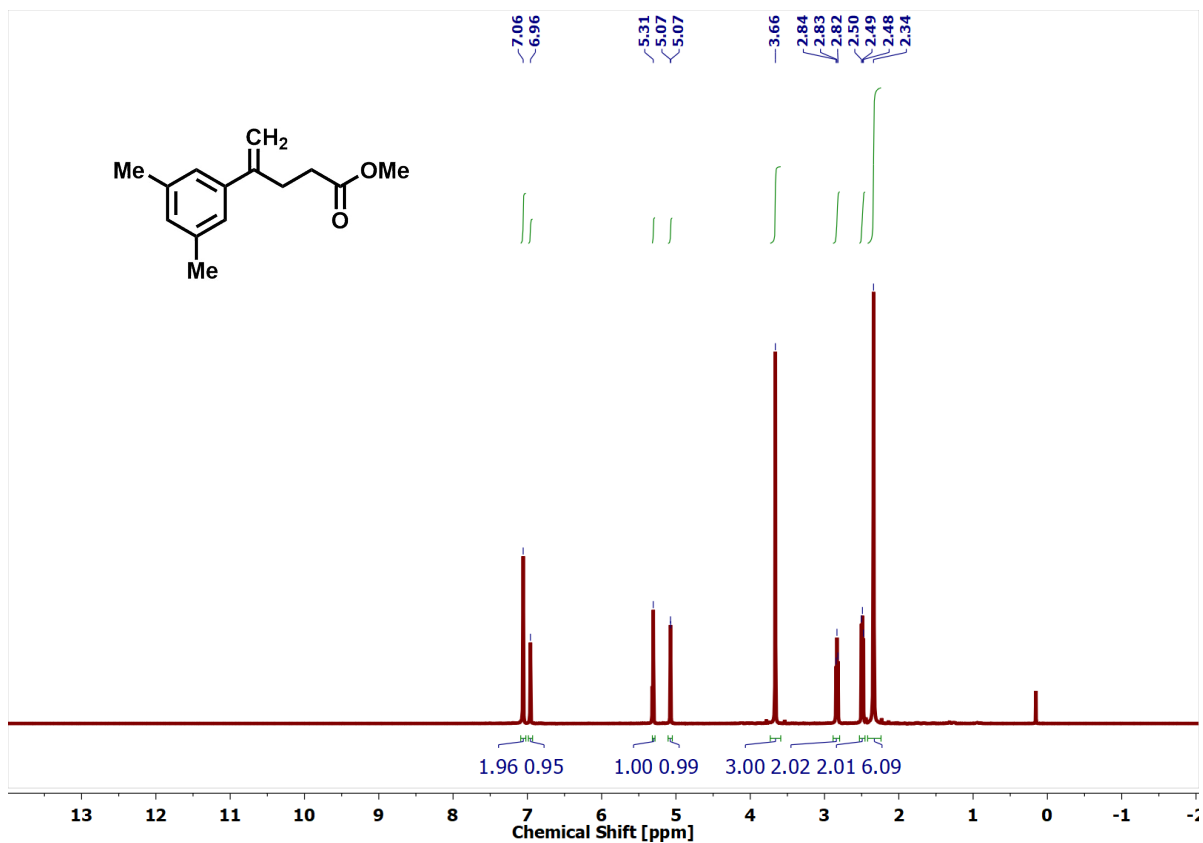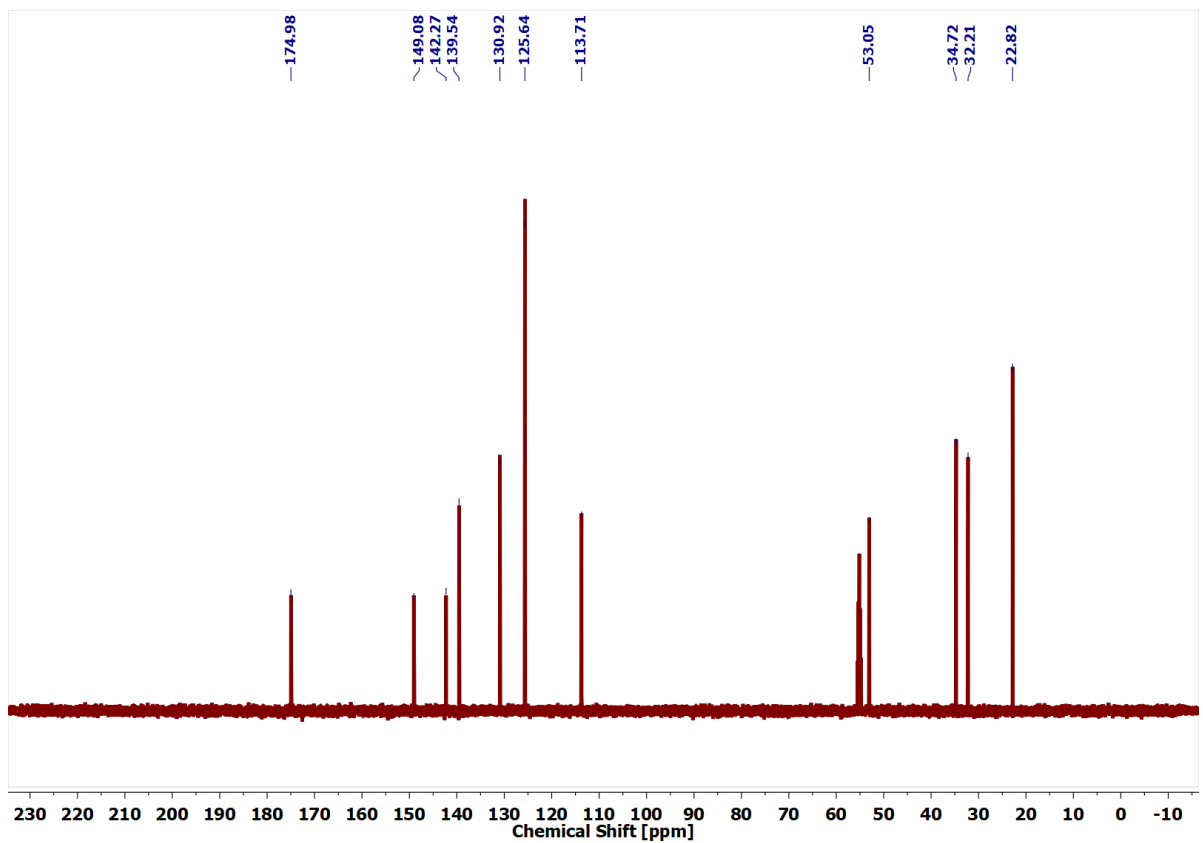

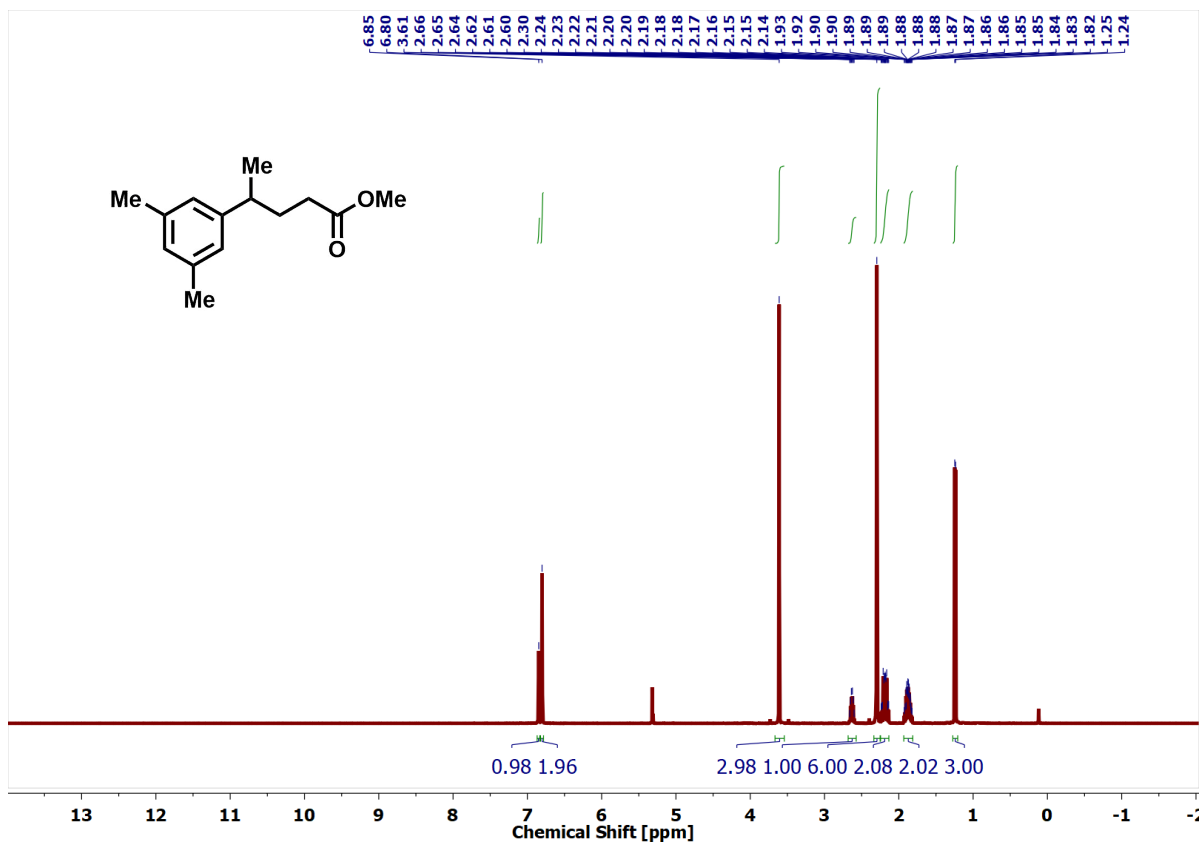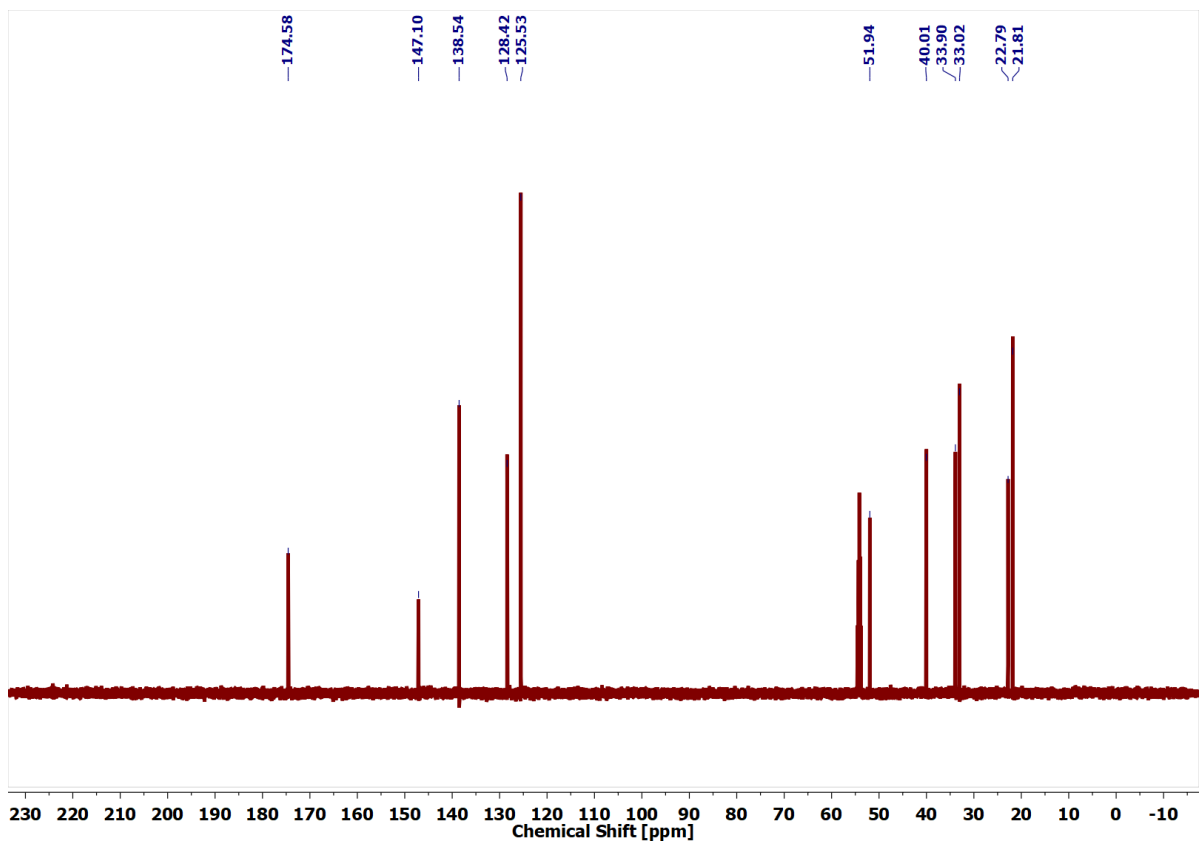

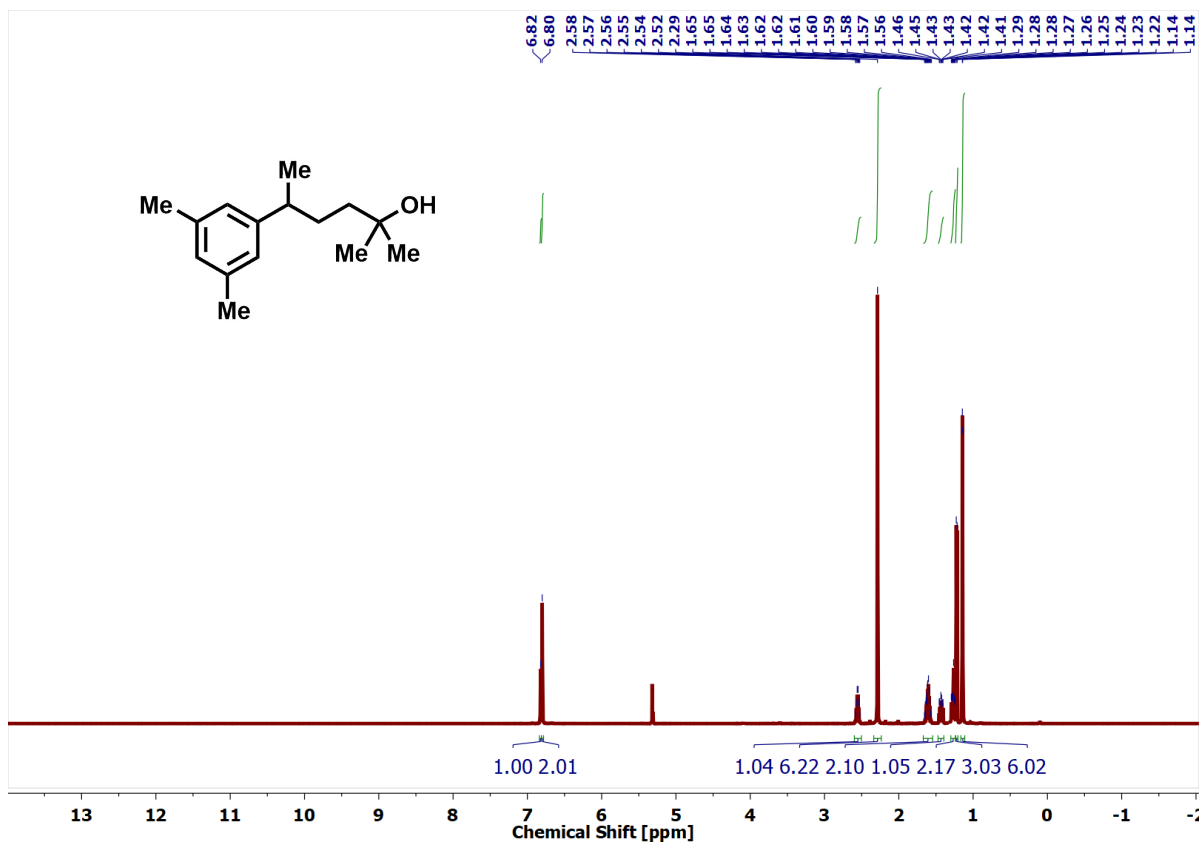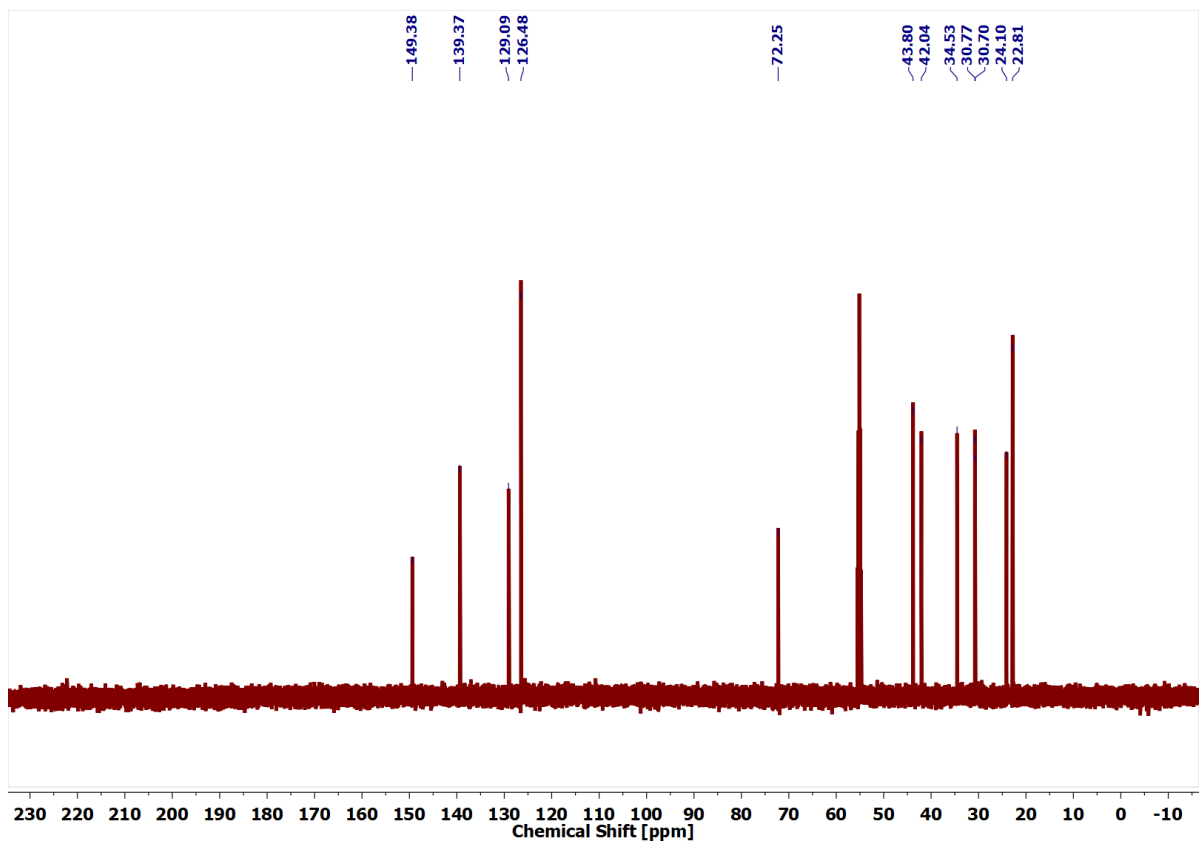

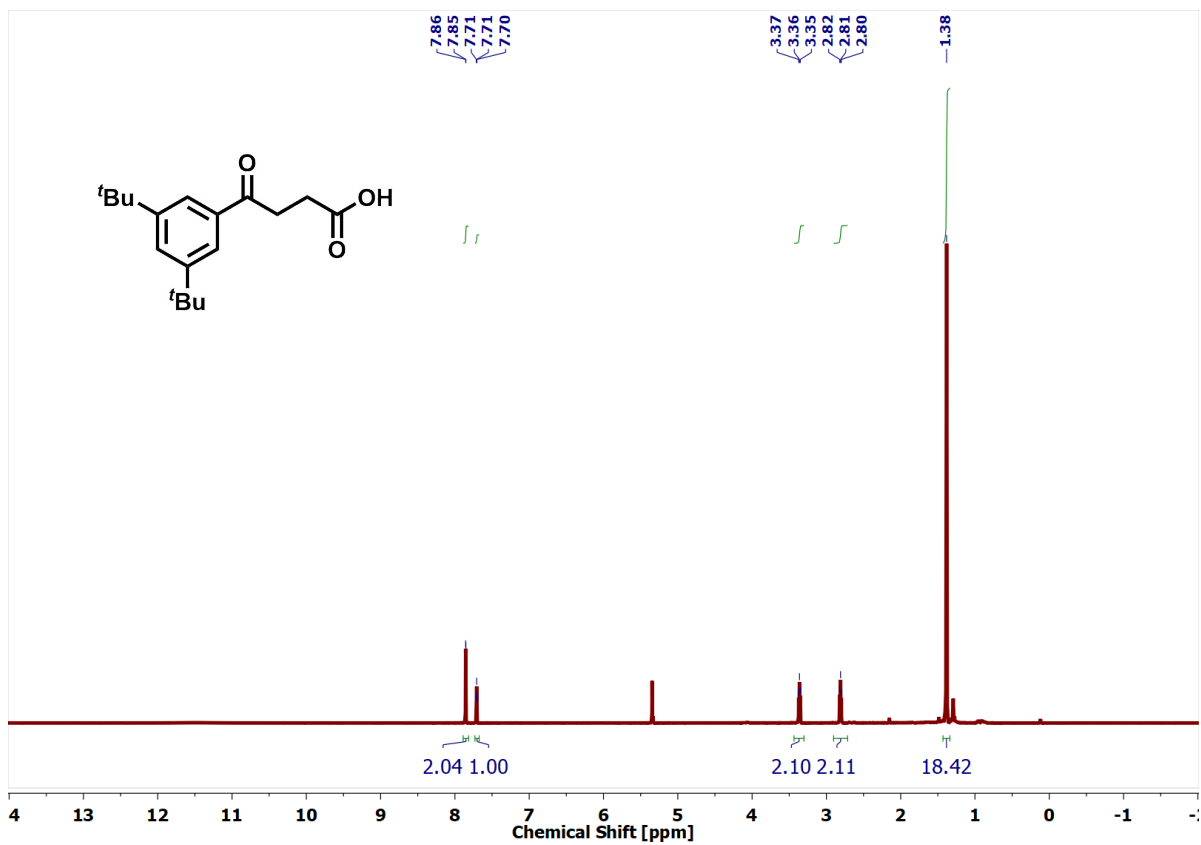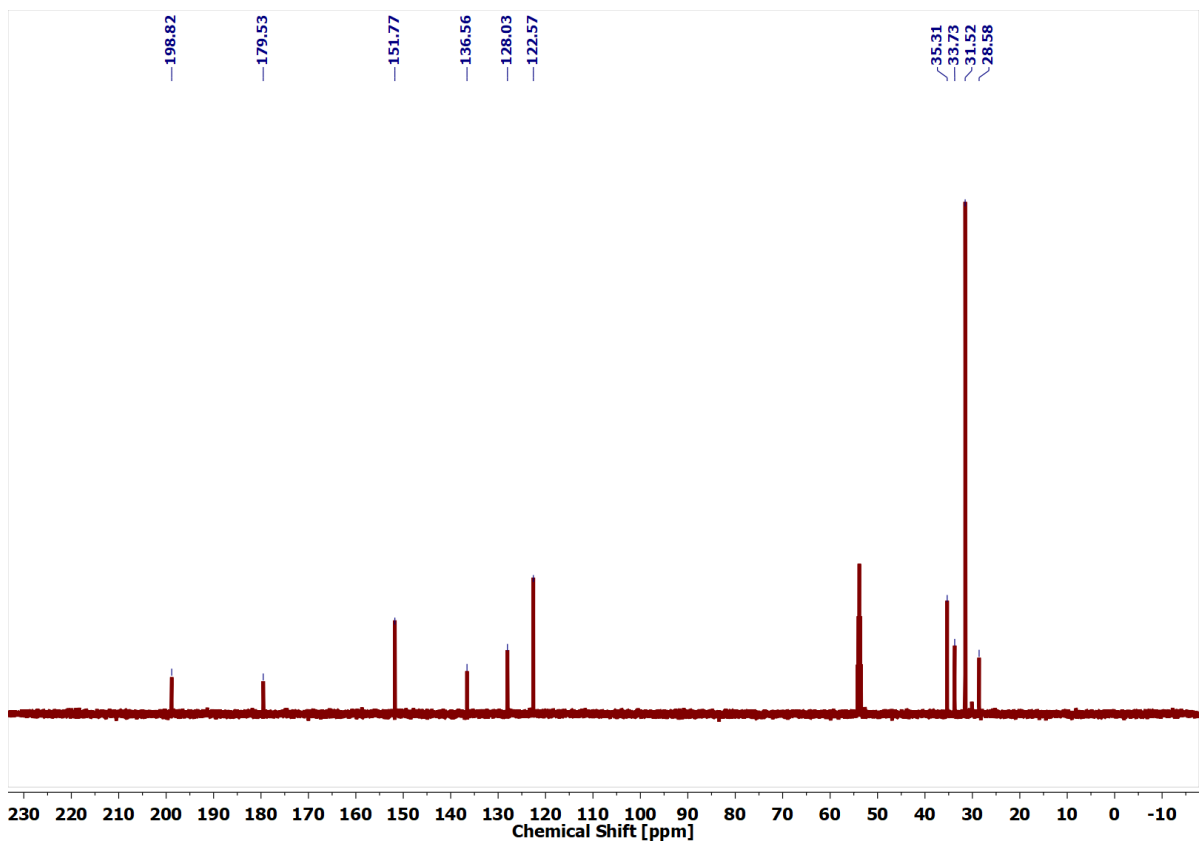



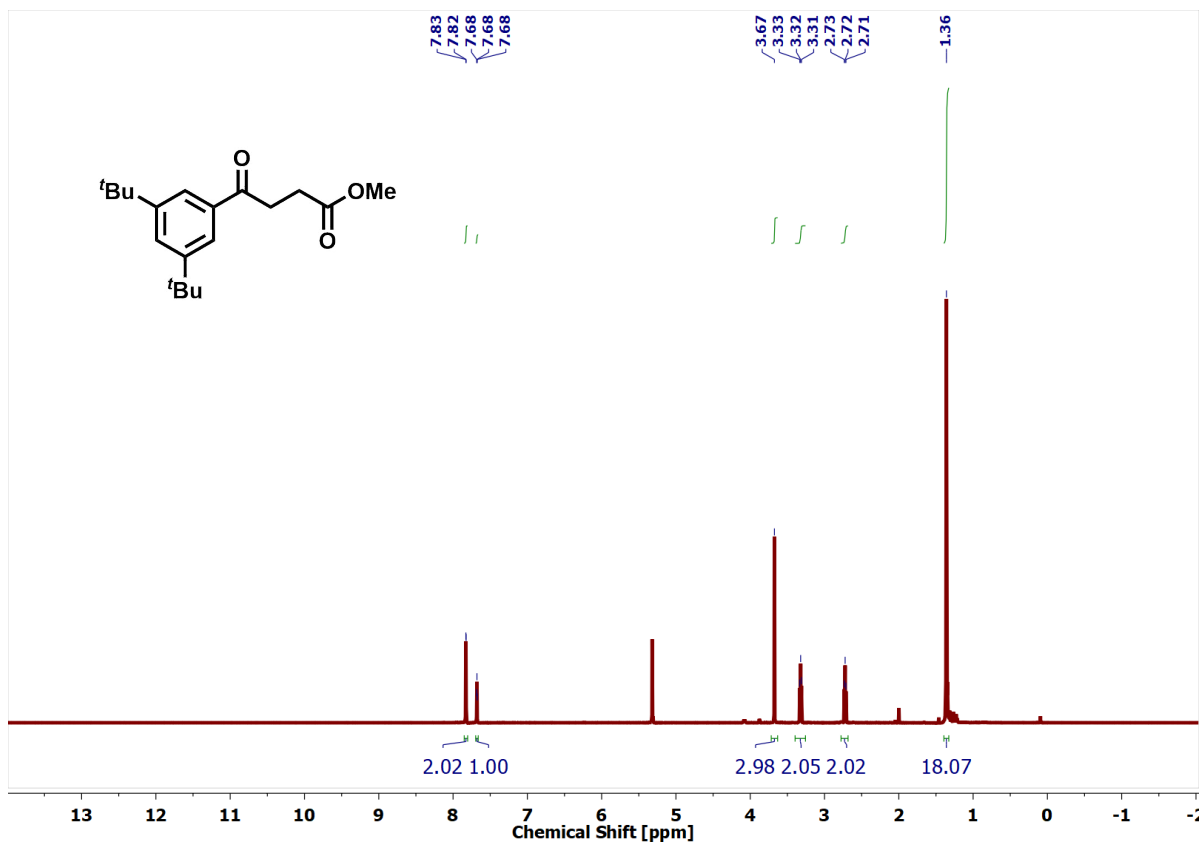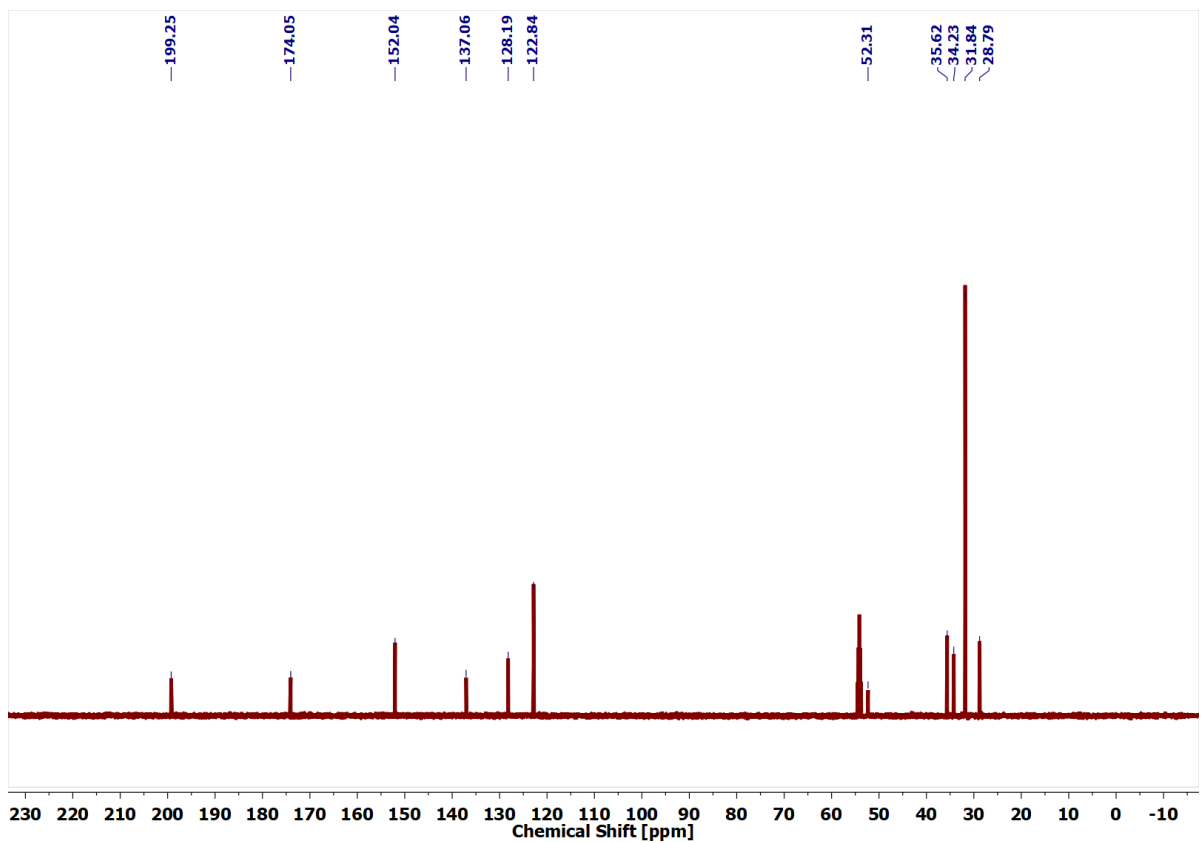

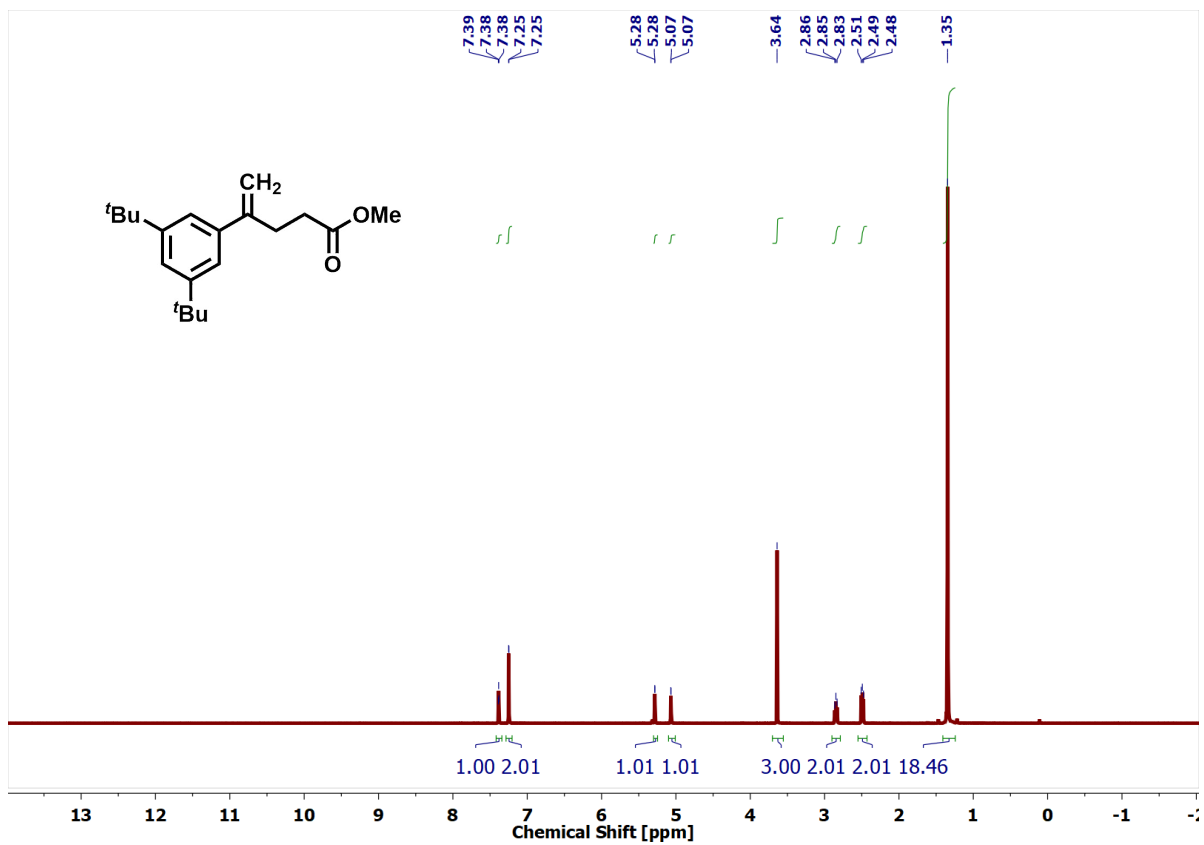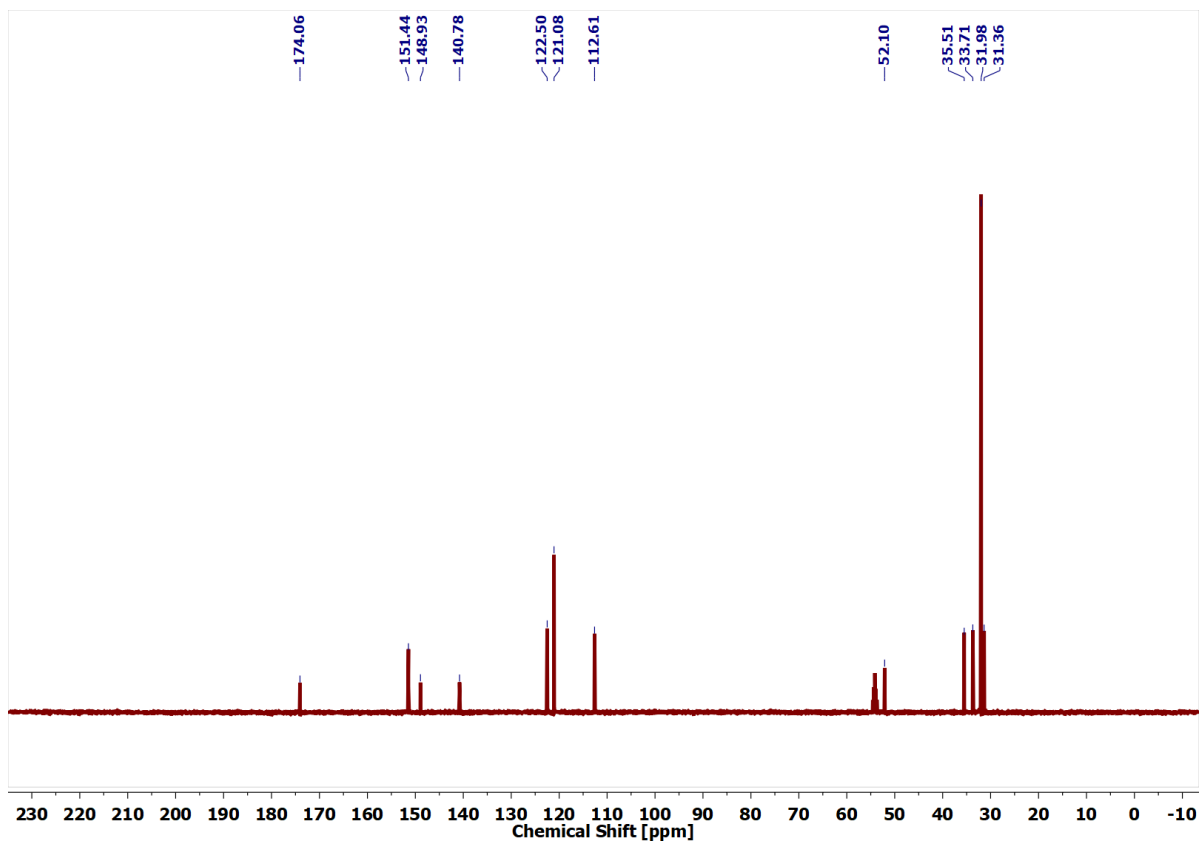

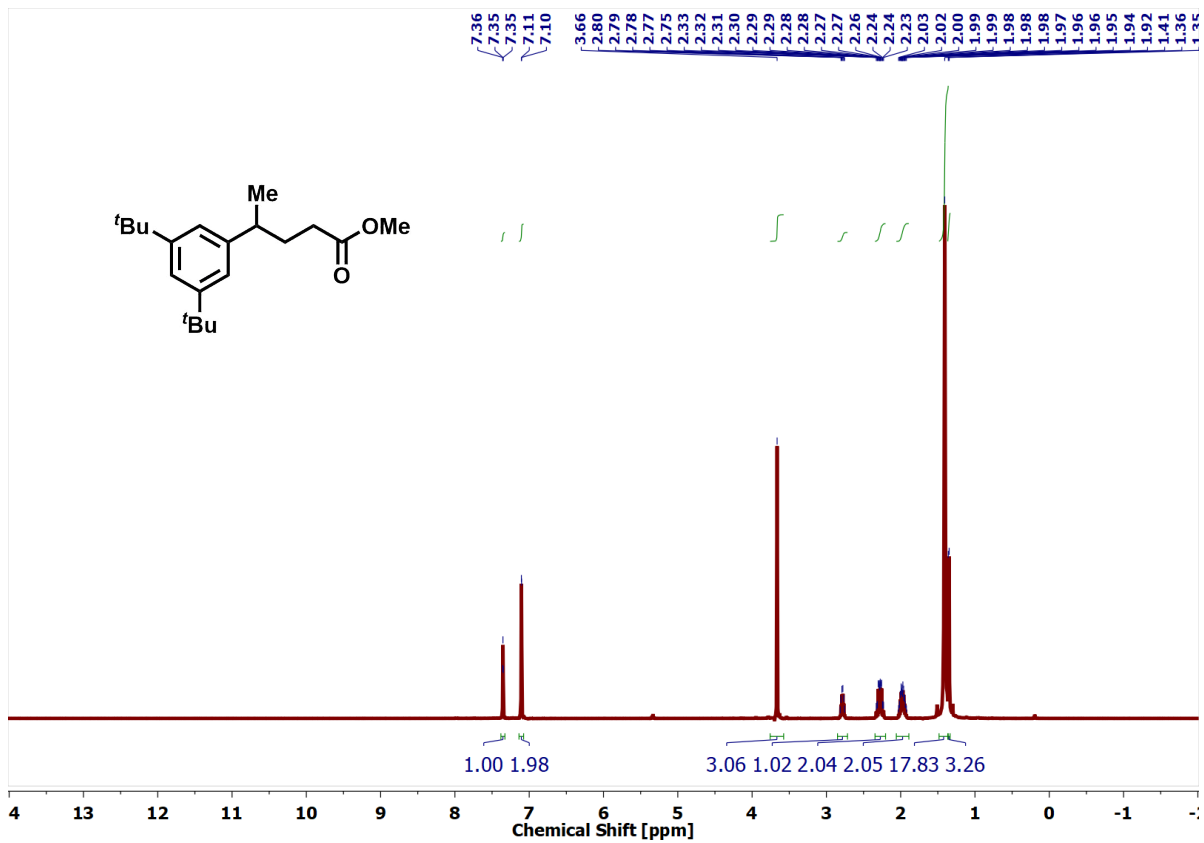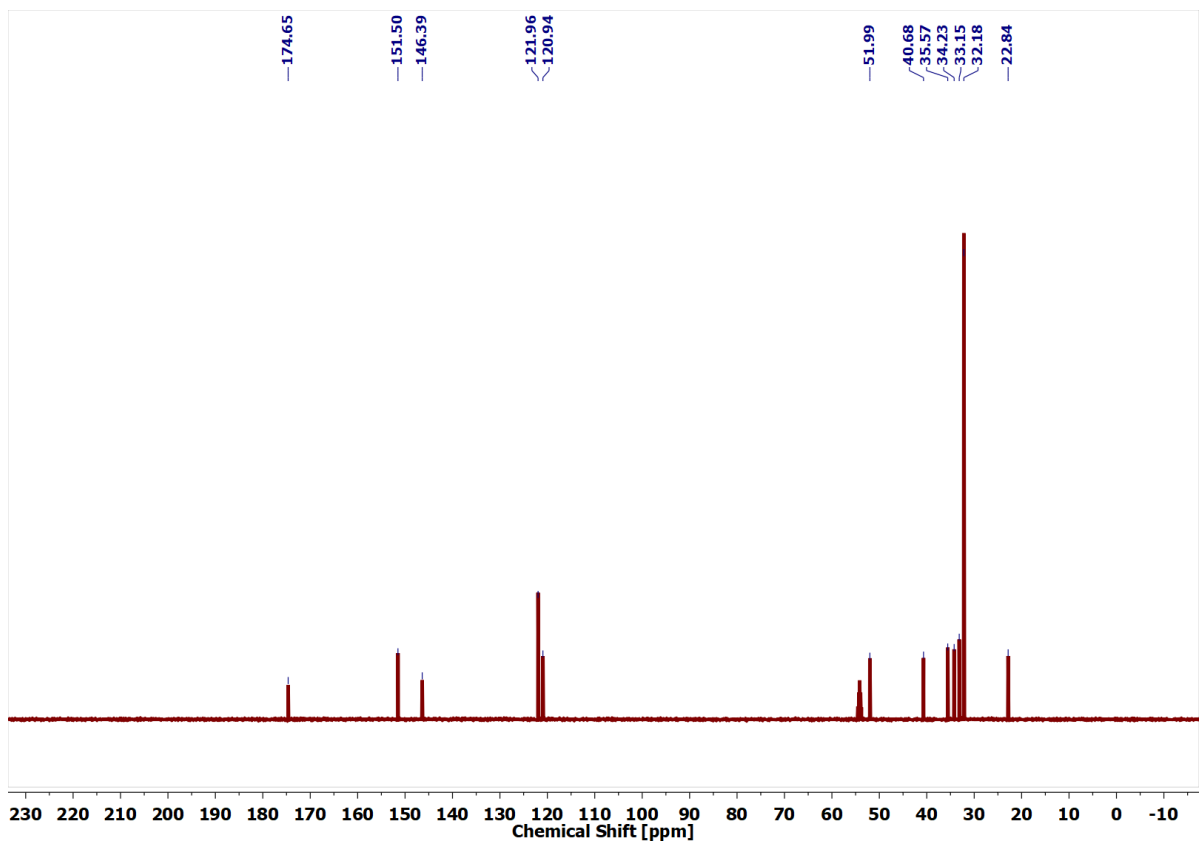

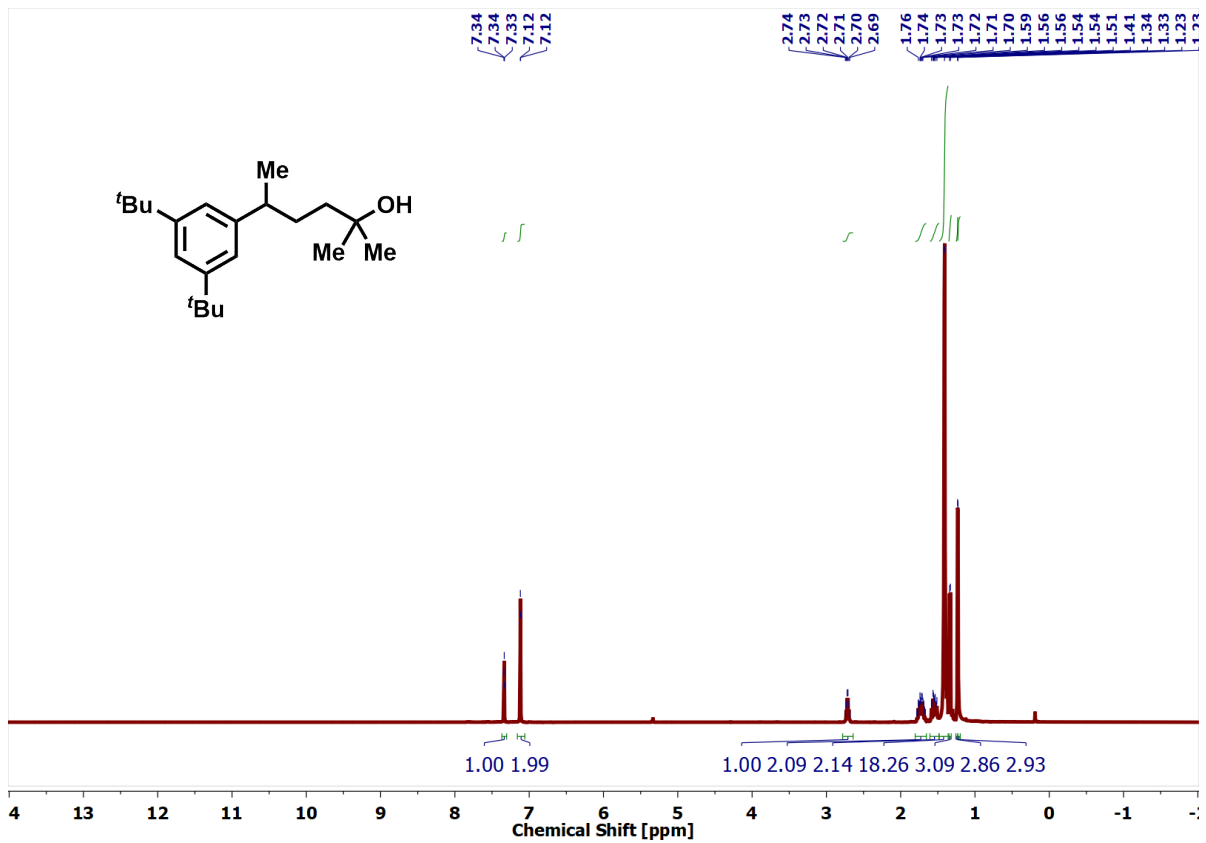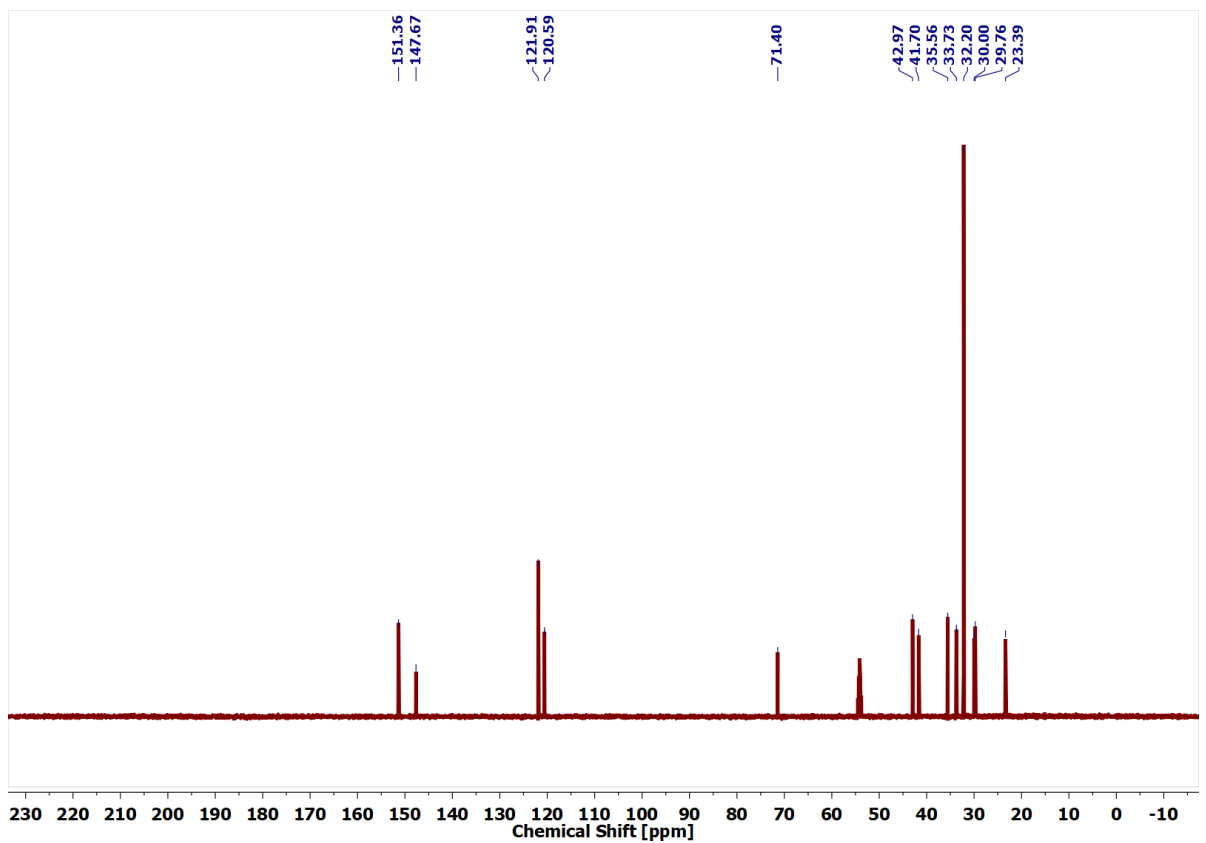

# NMR spectra of organoazides

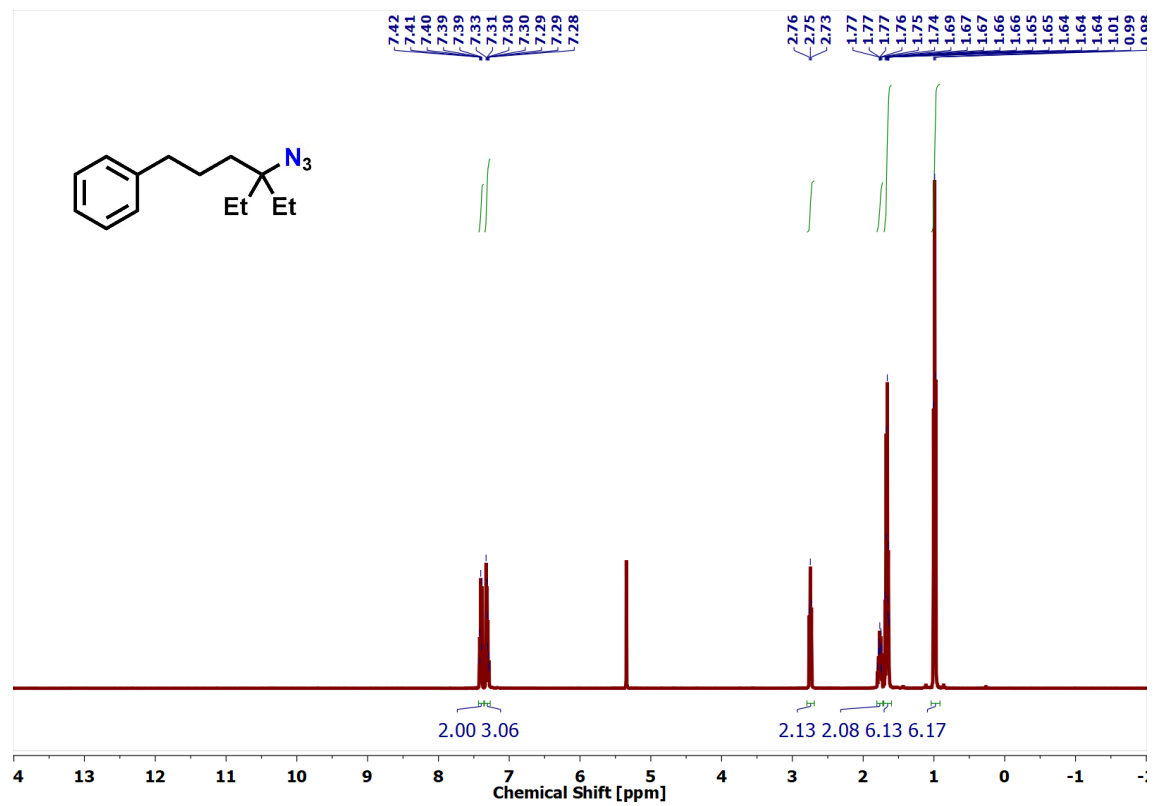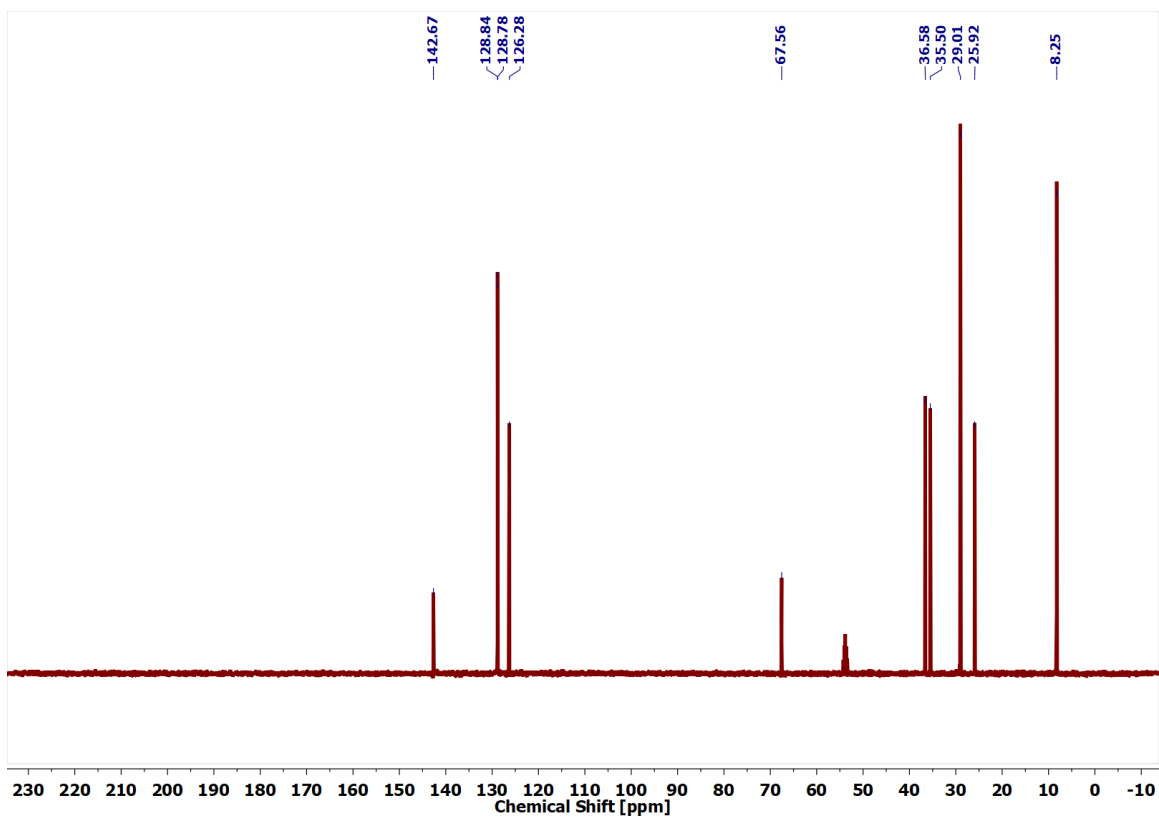

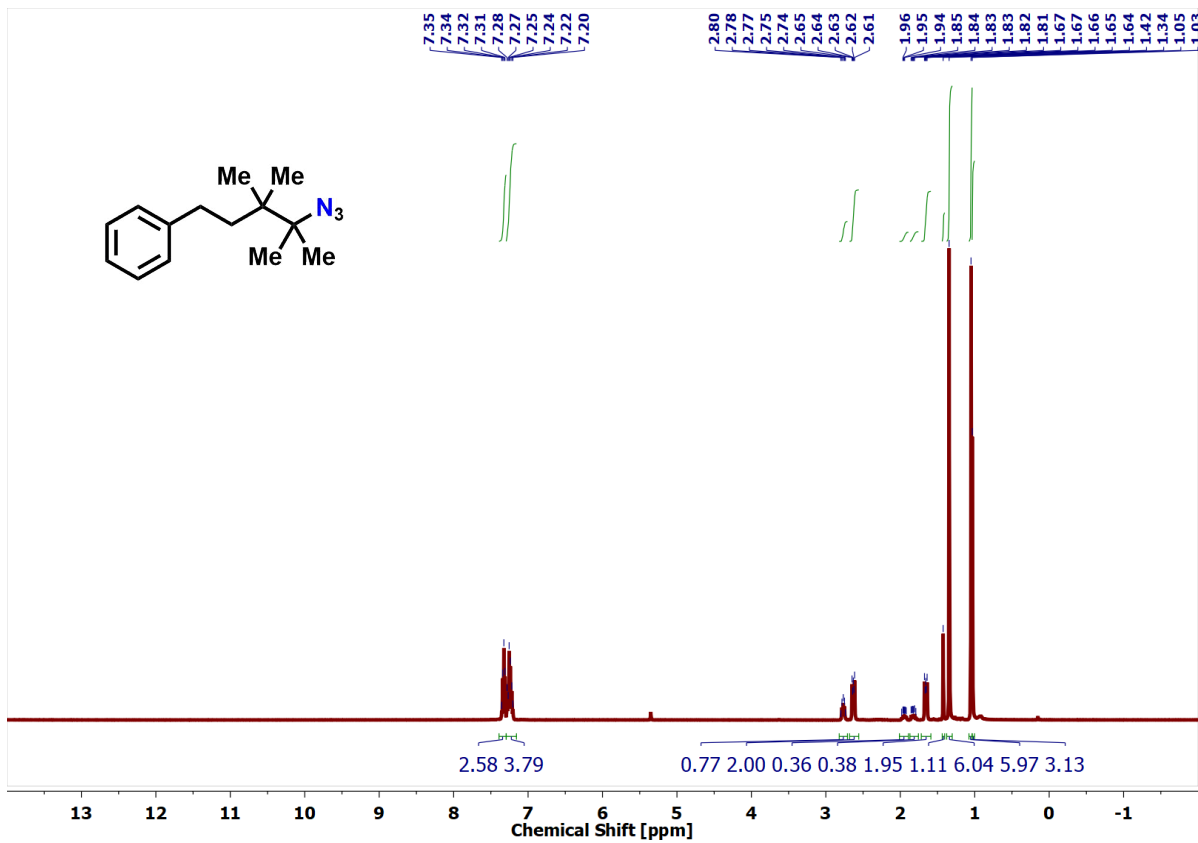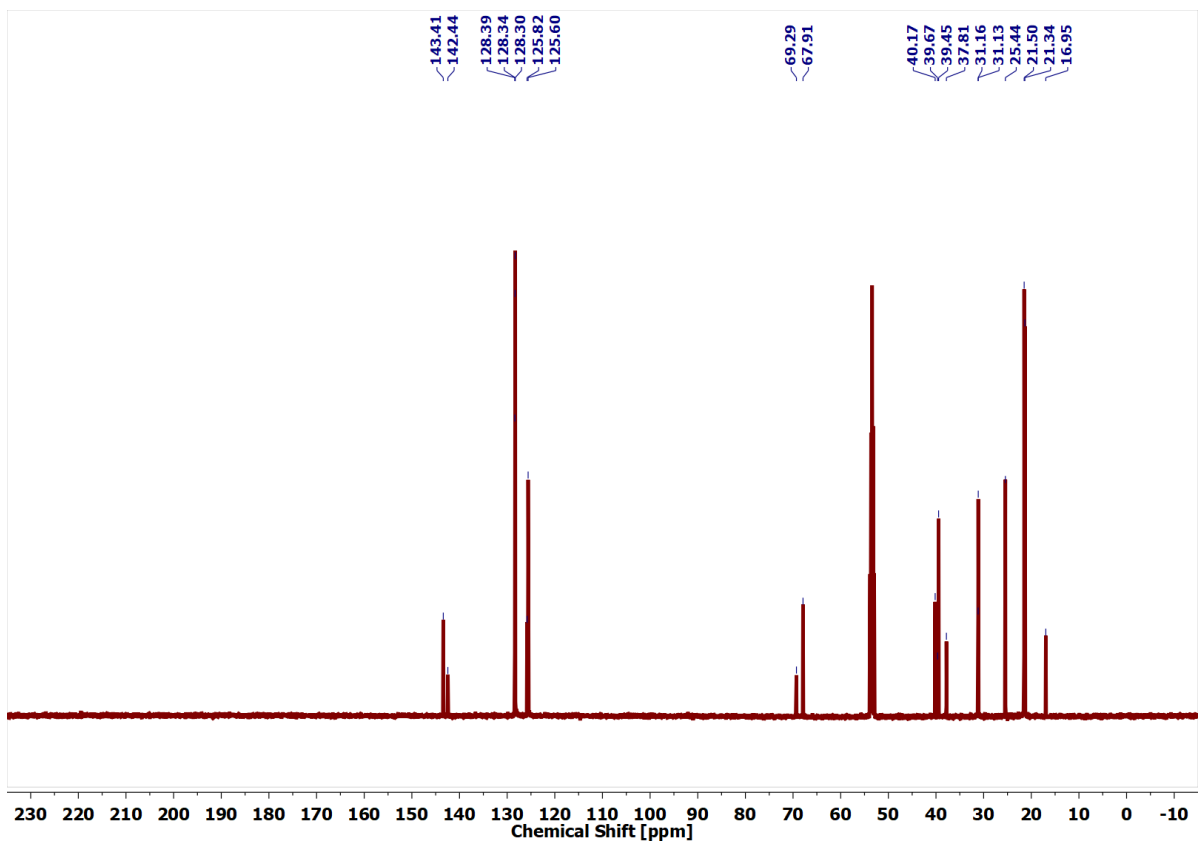

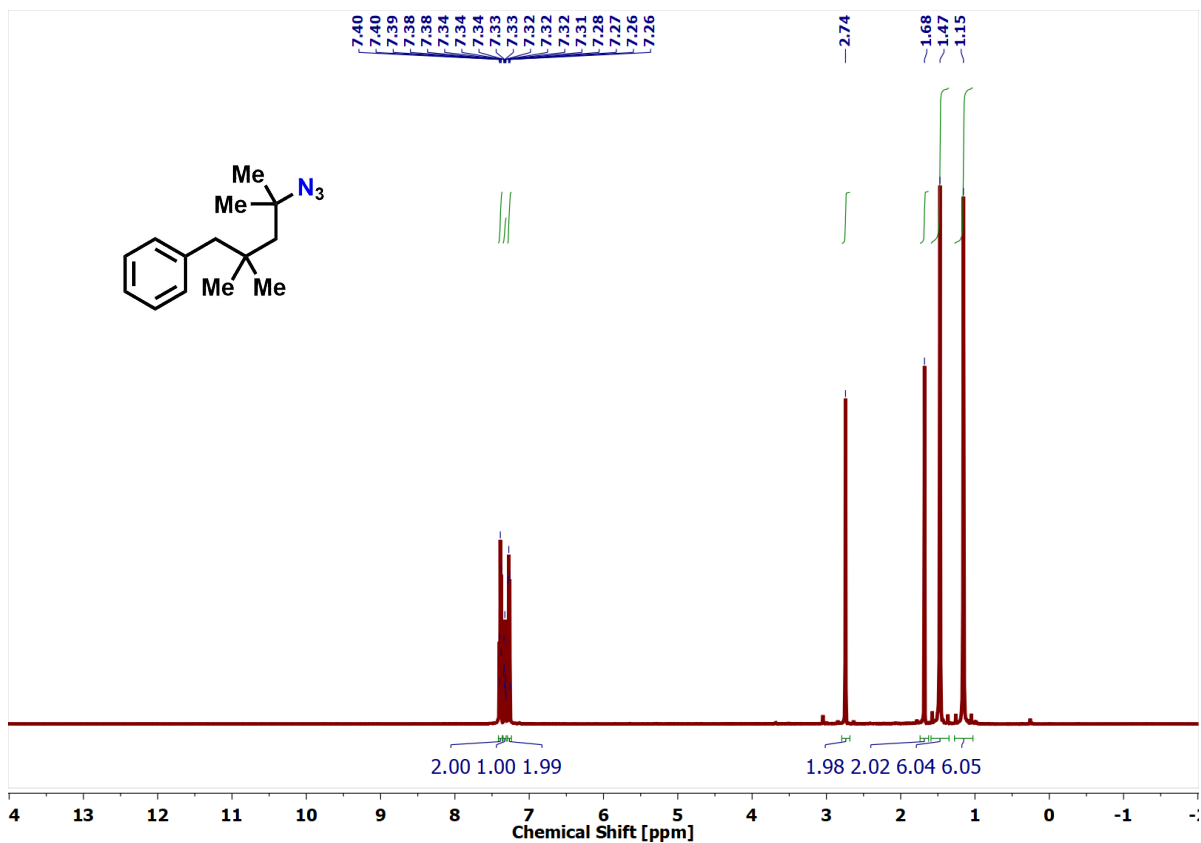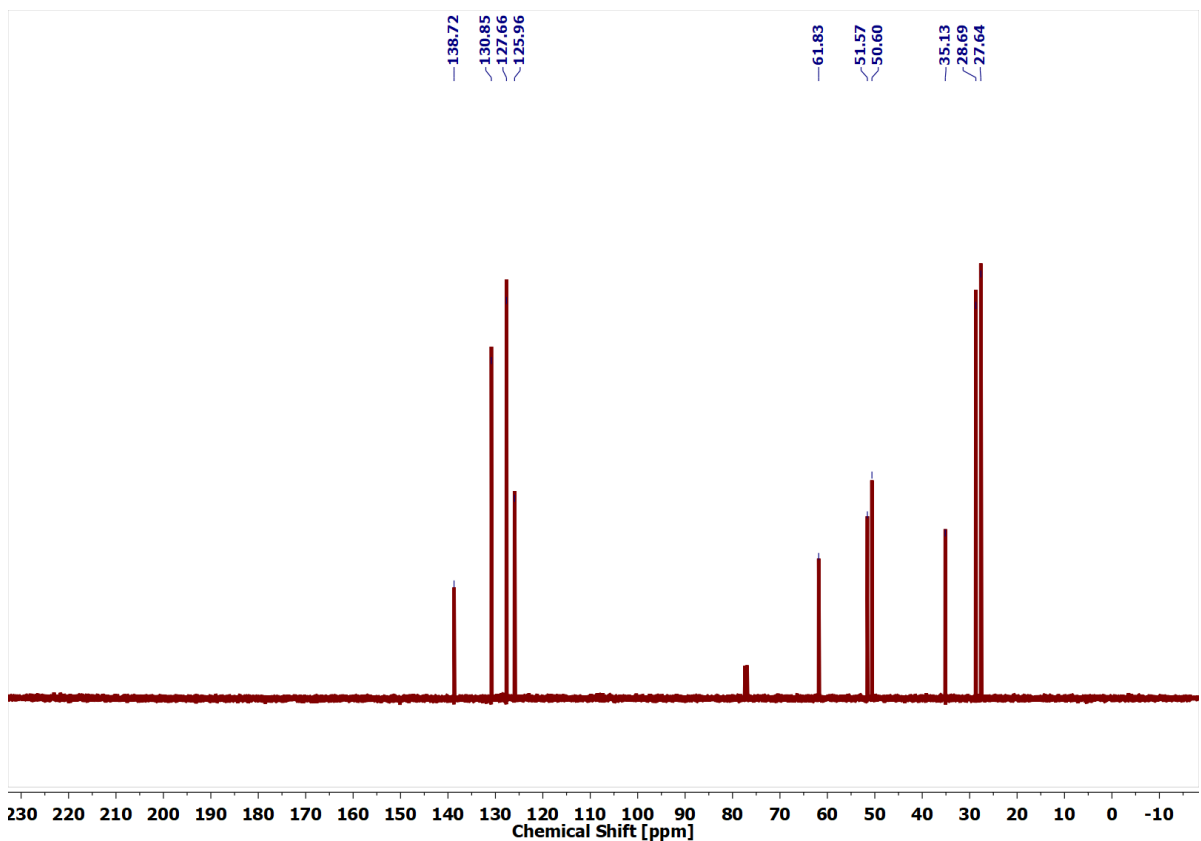

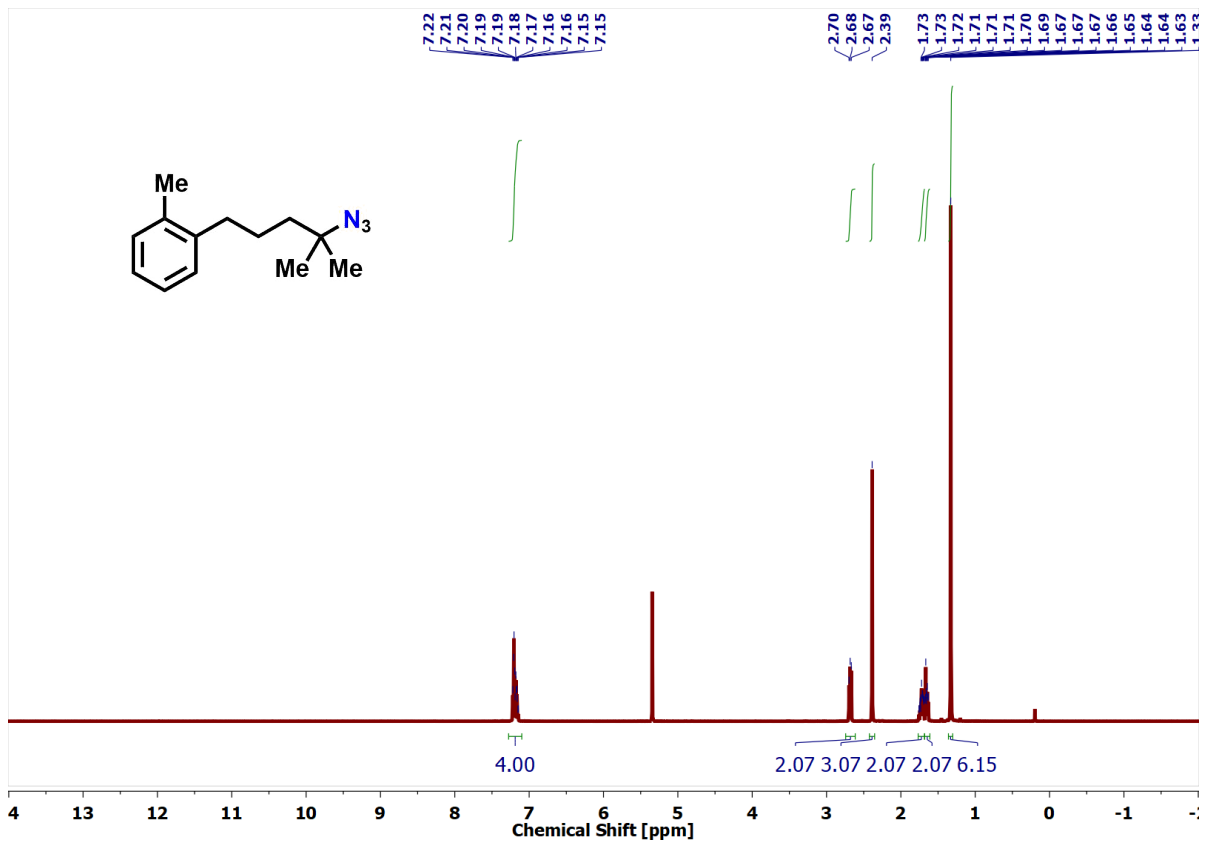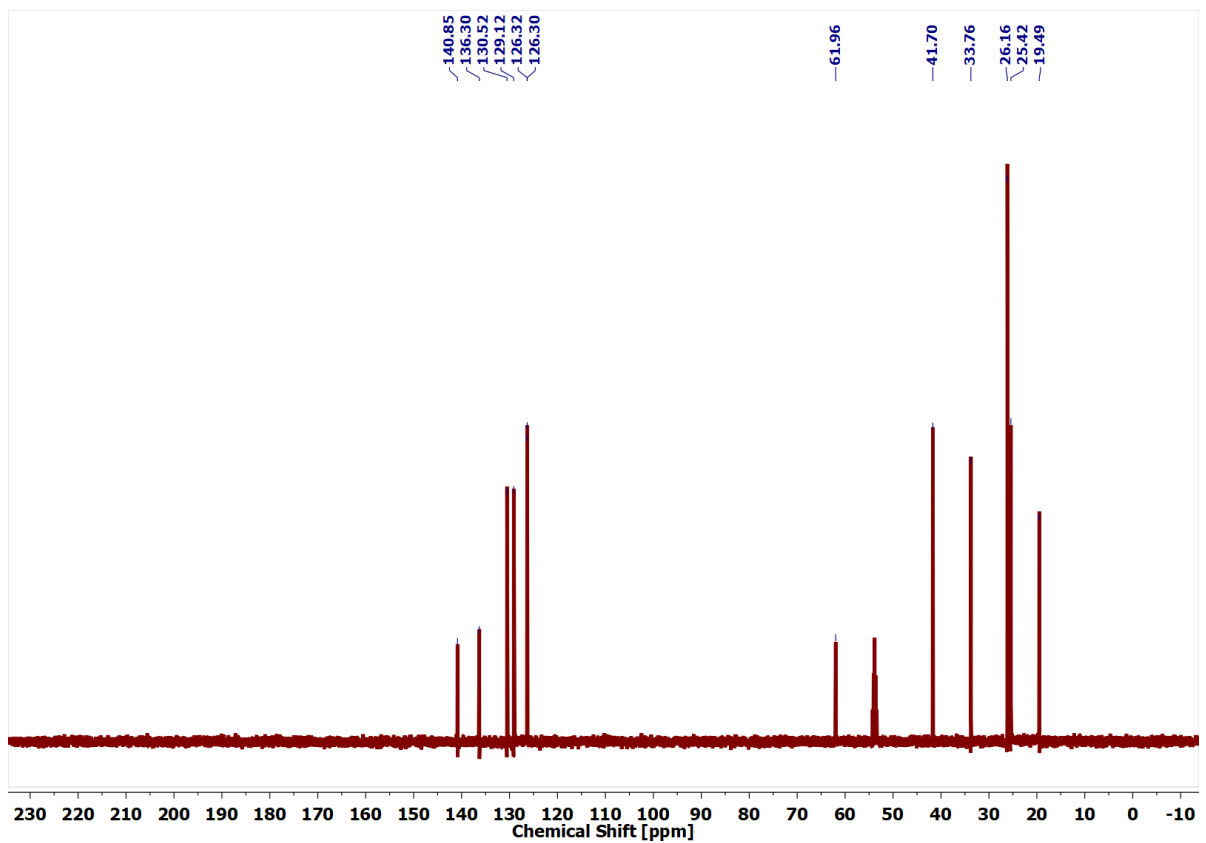



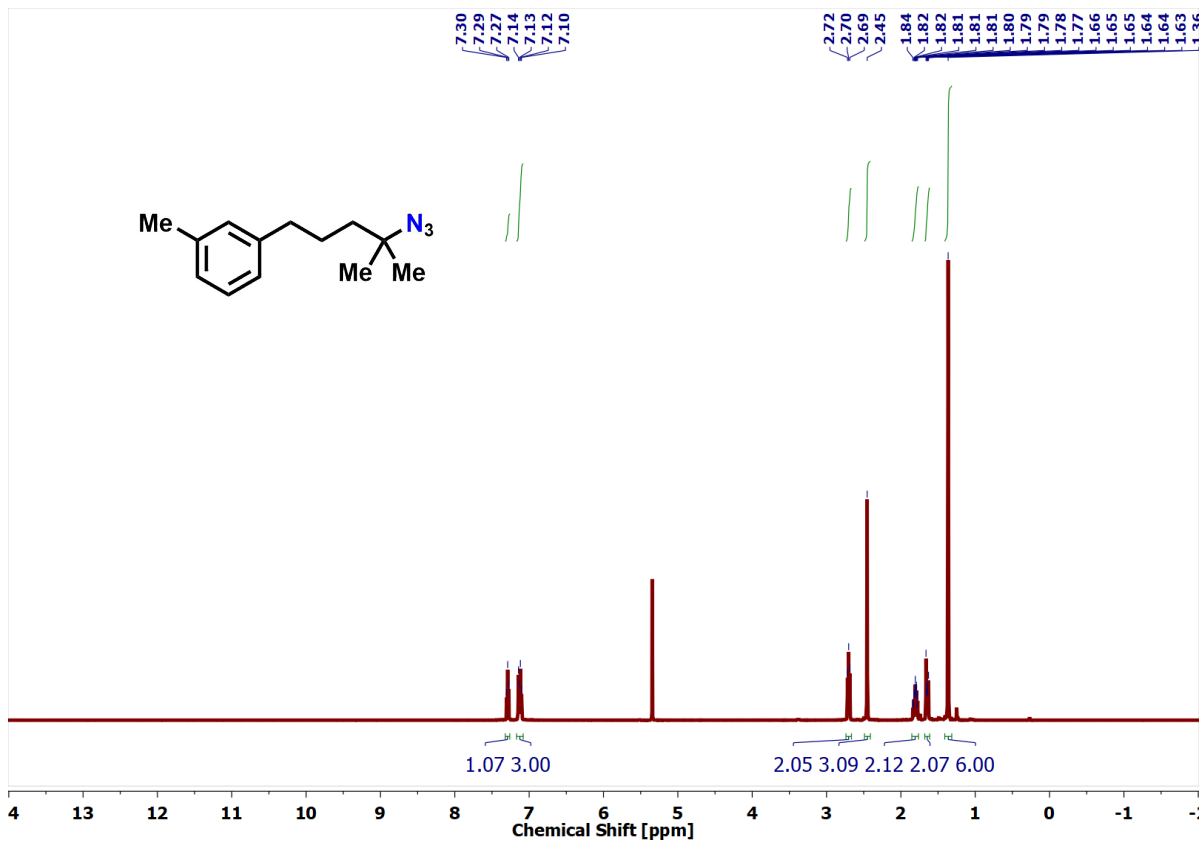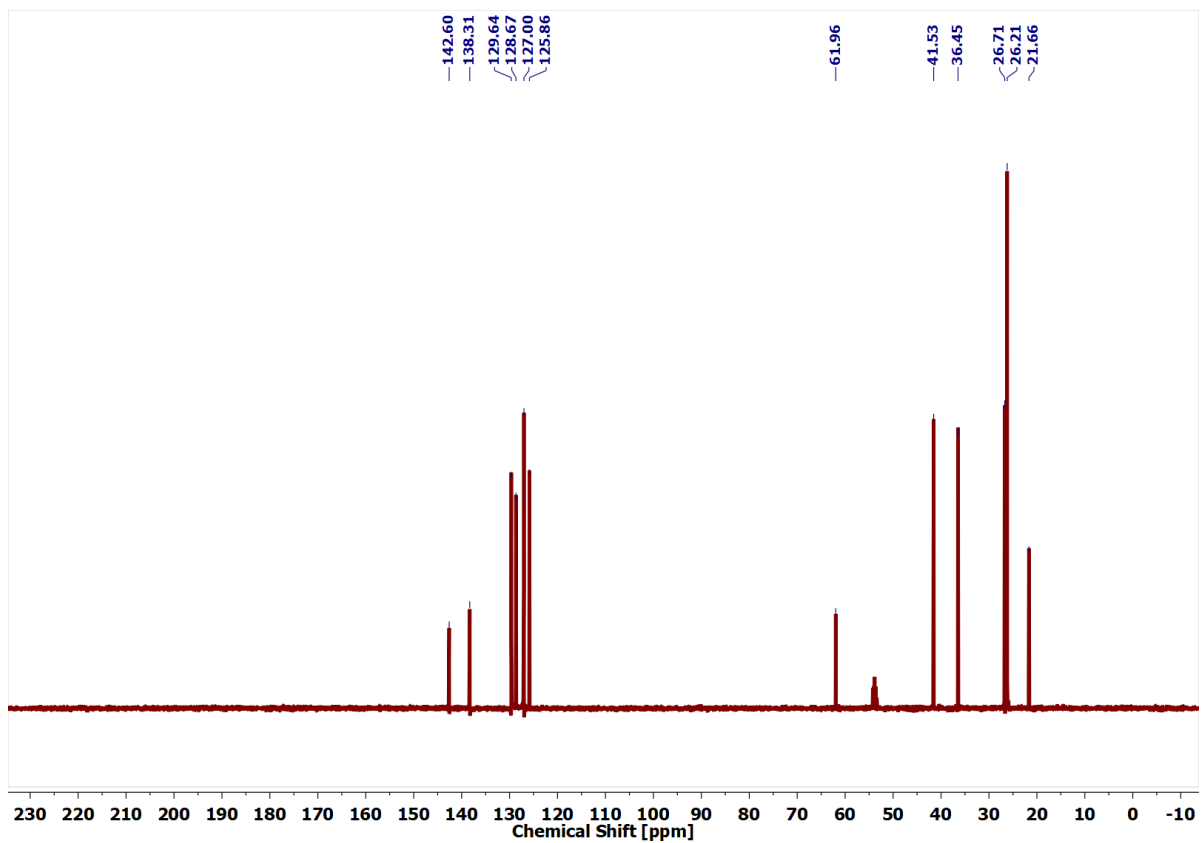

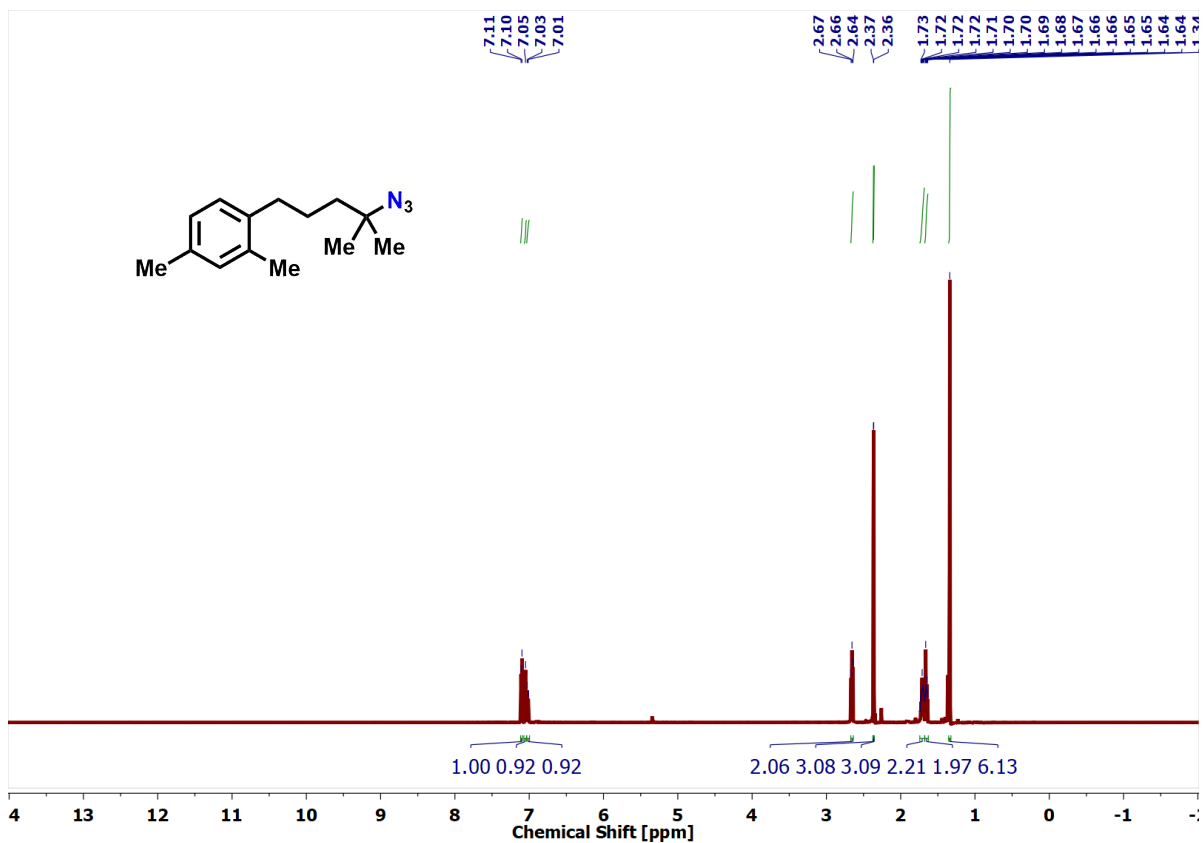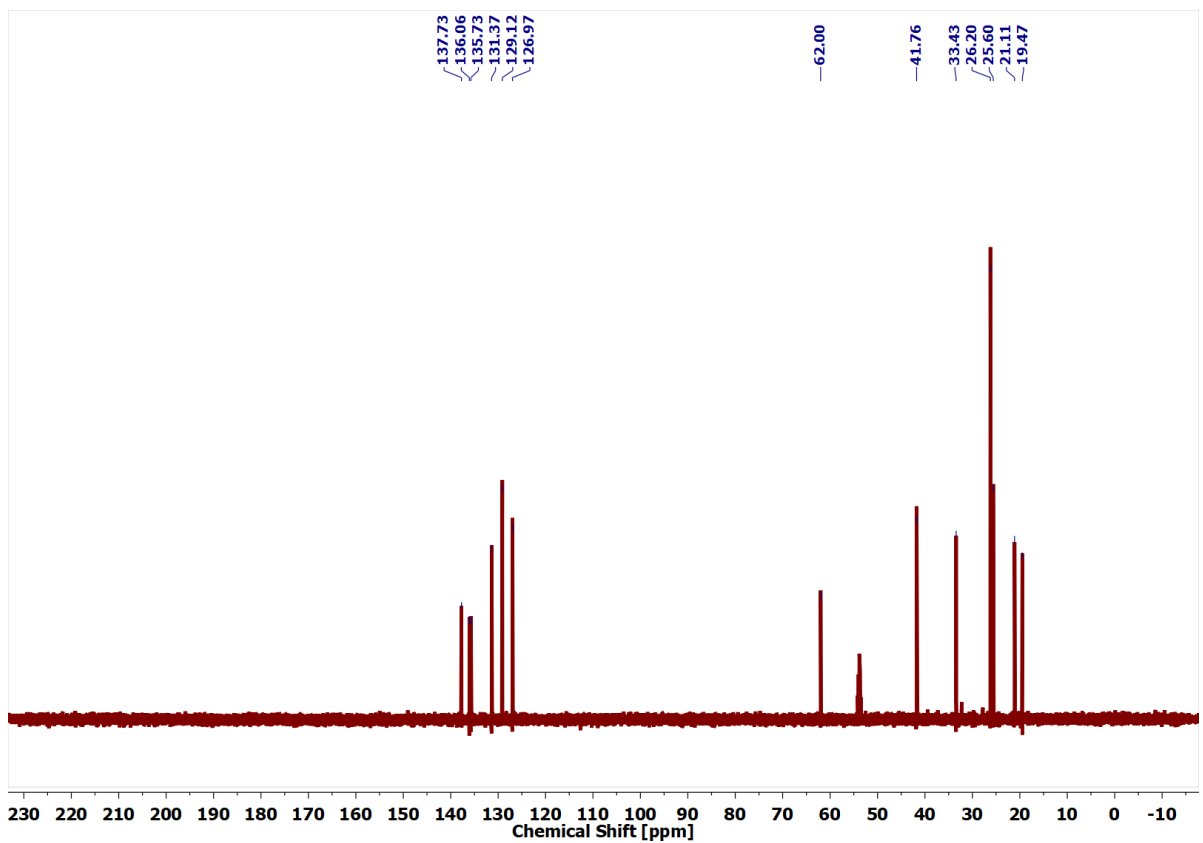

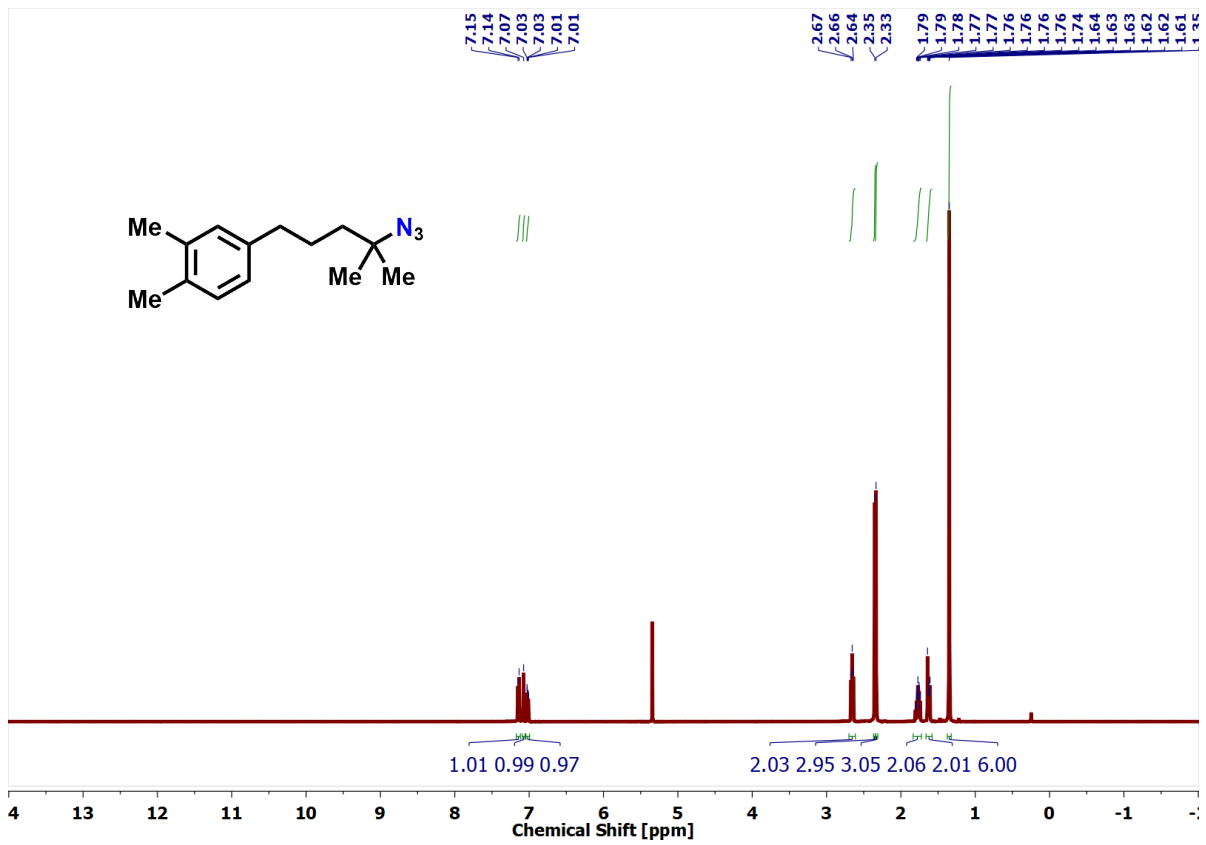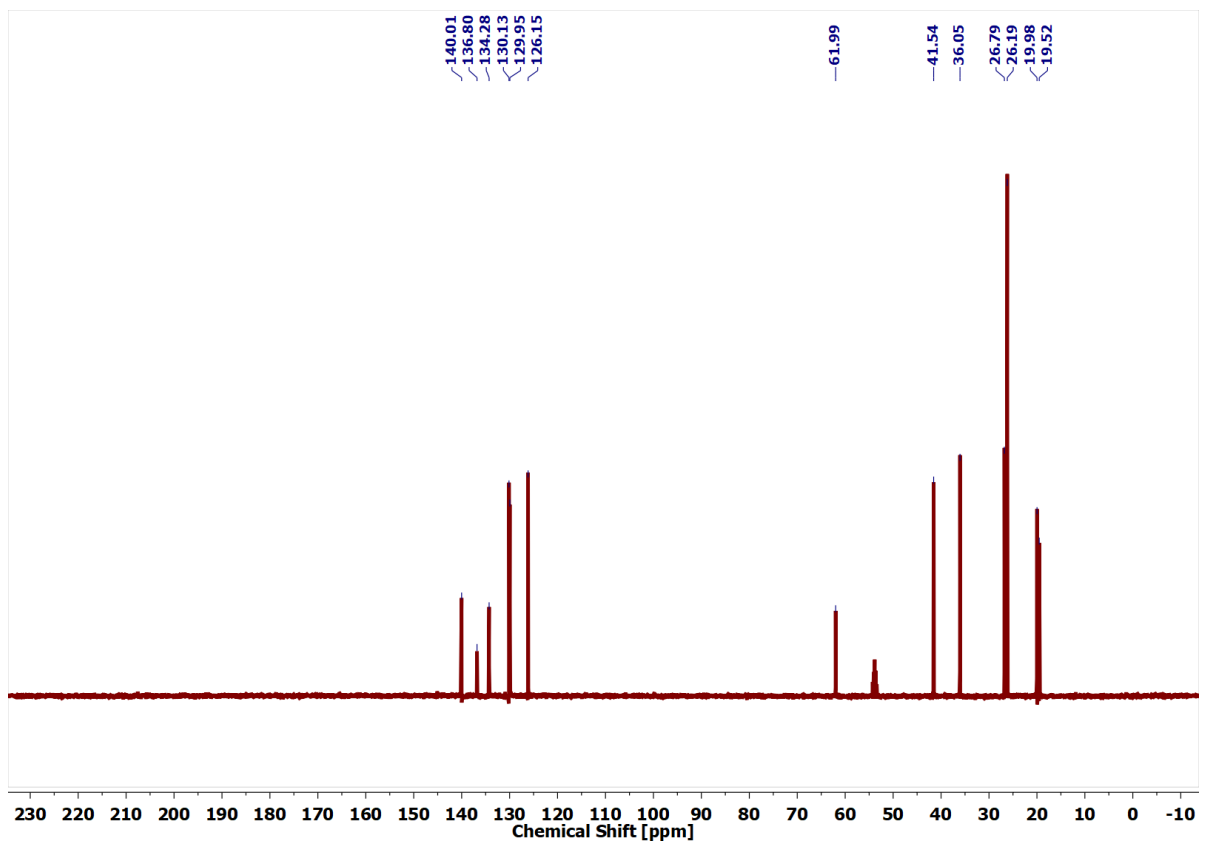

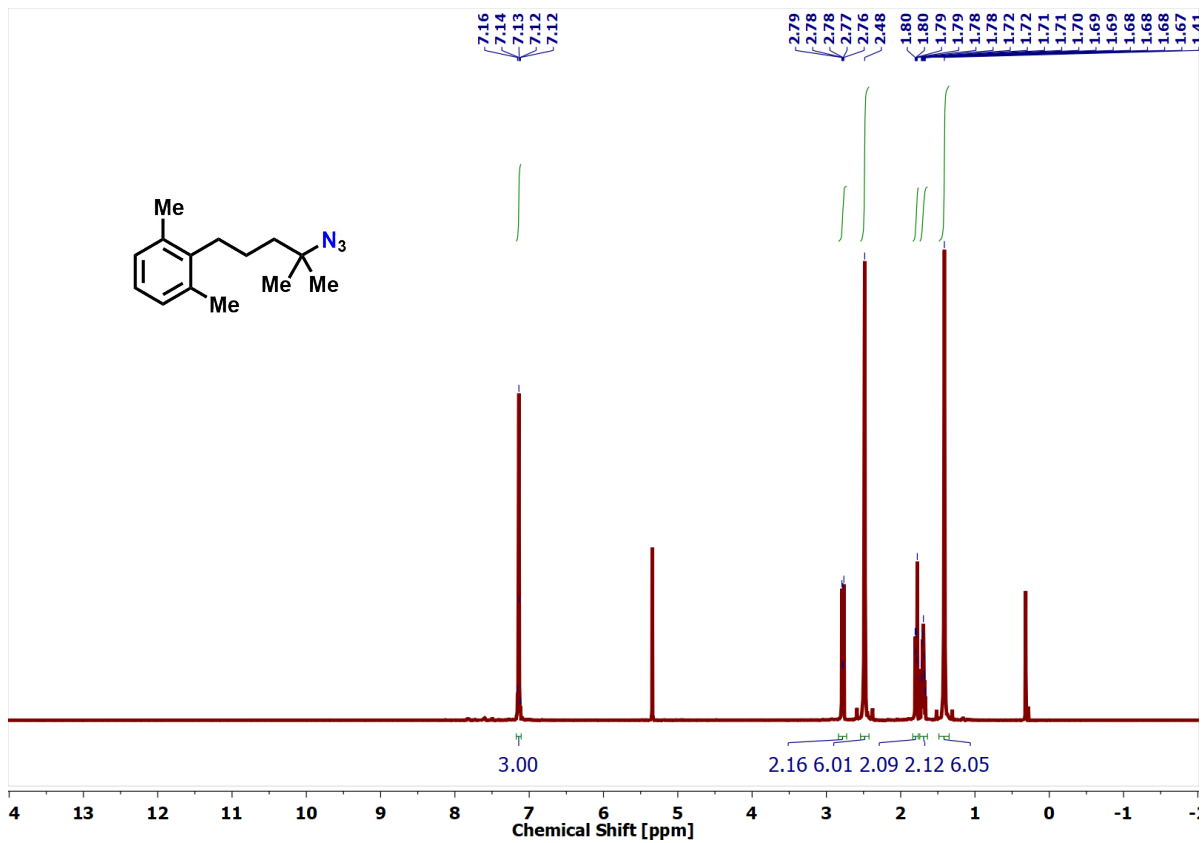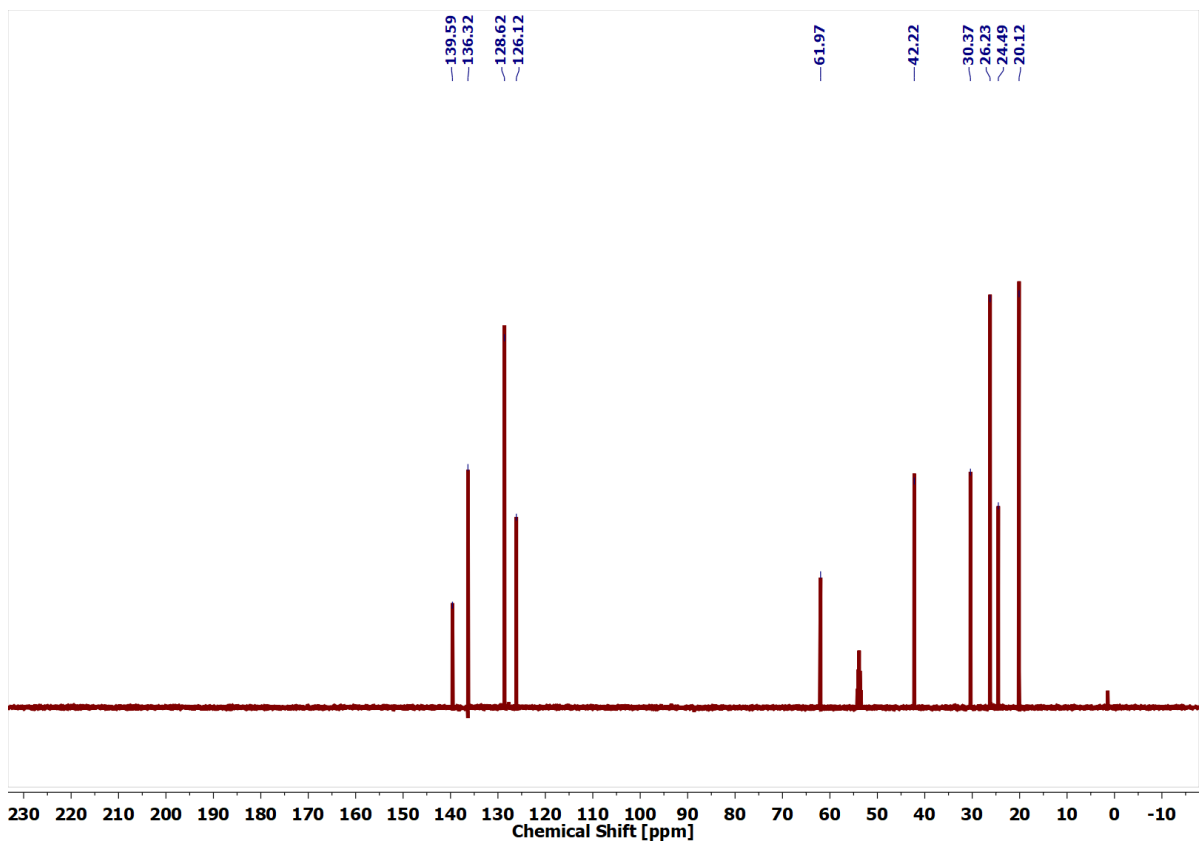

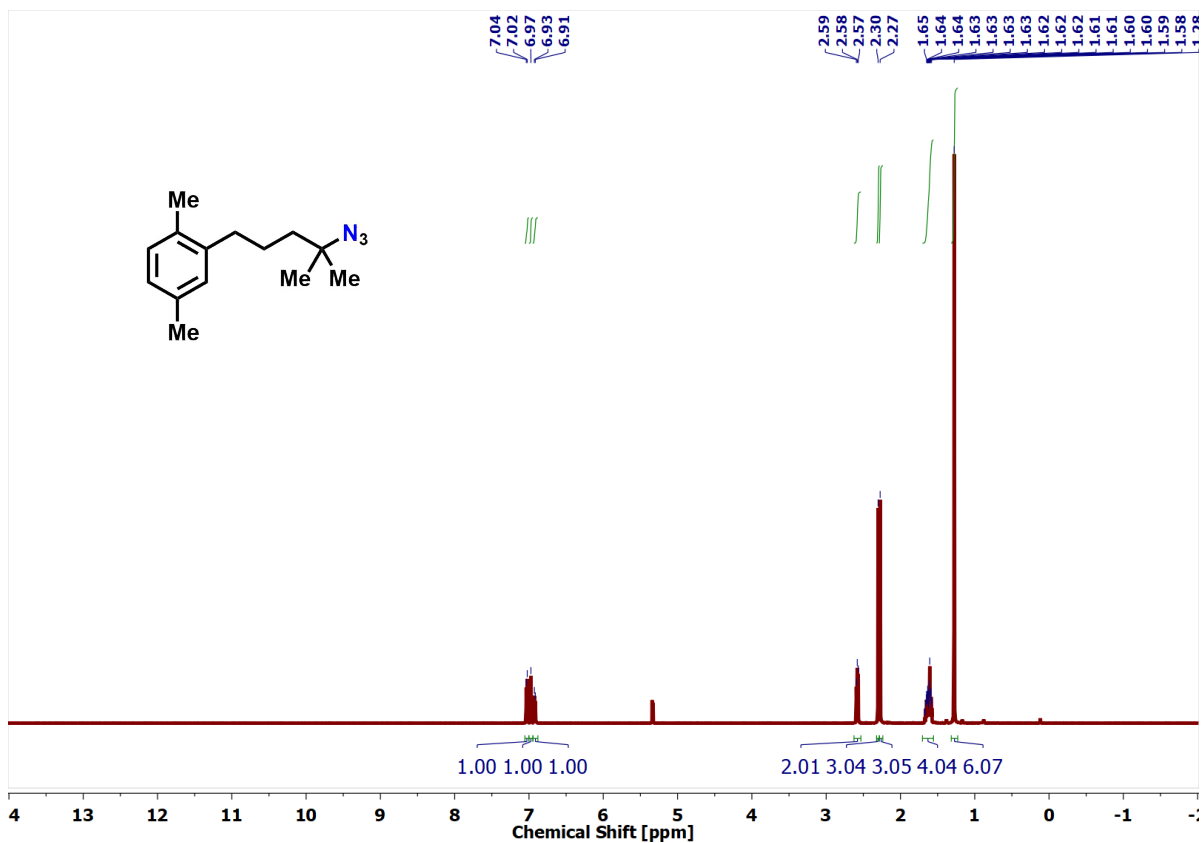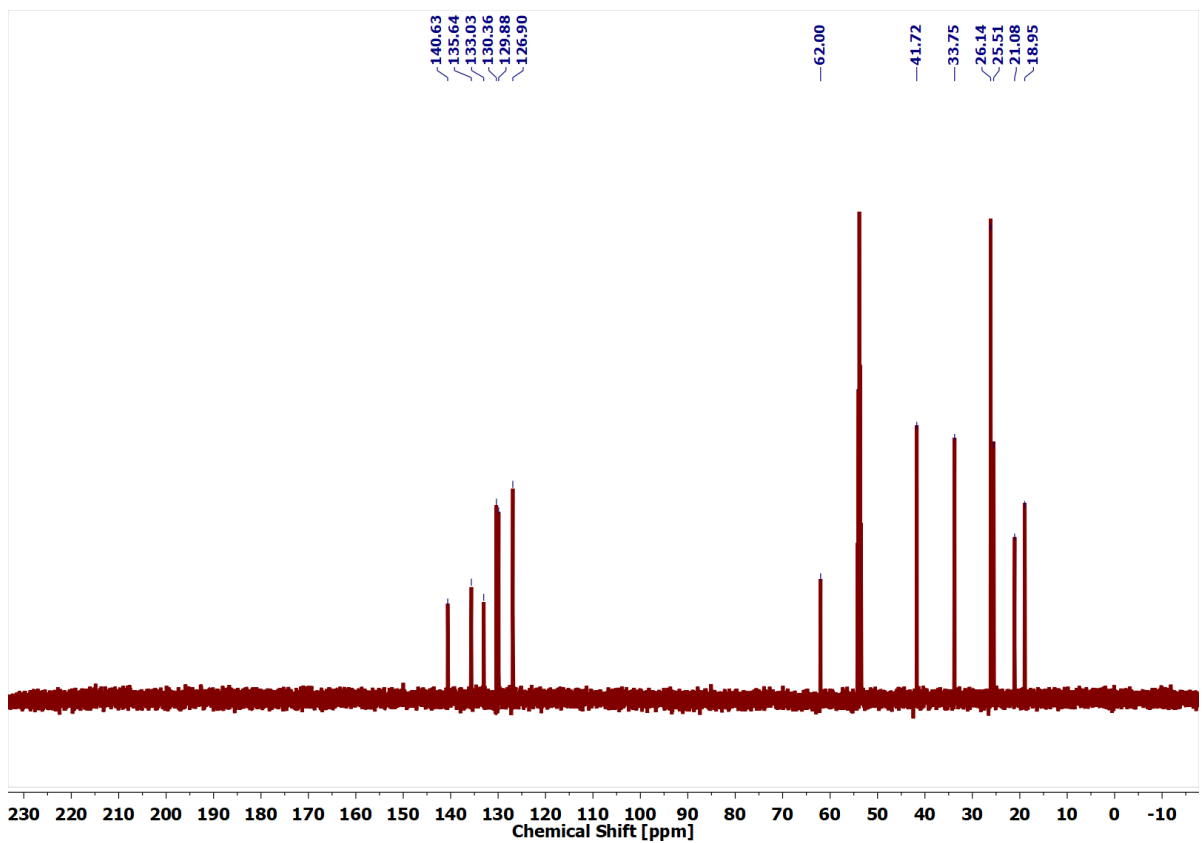

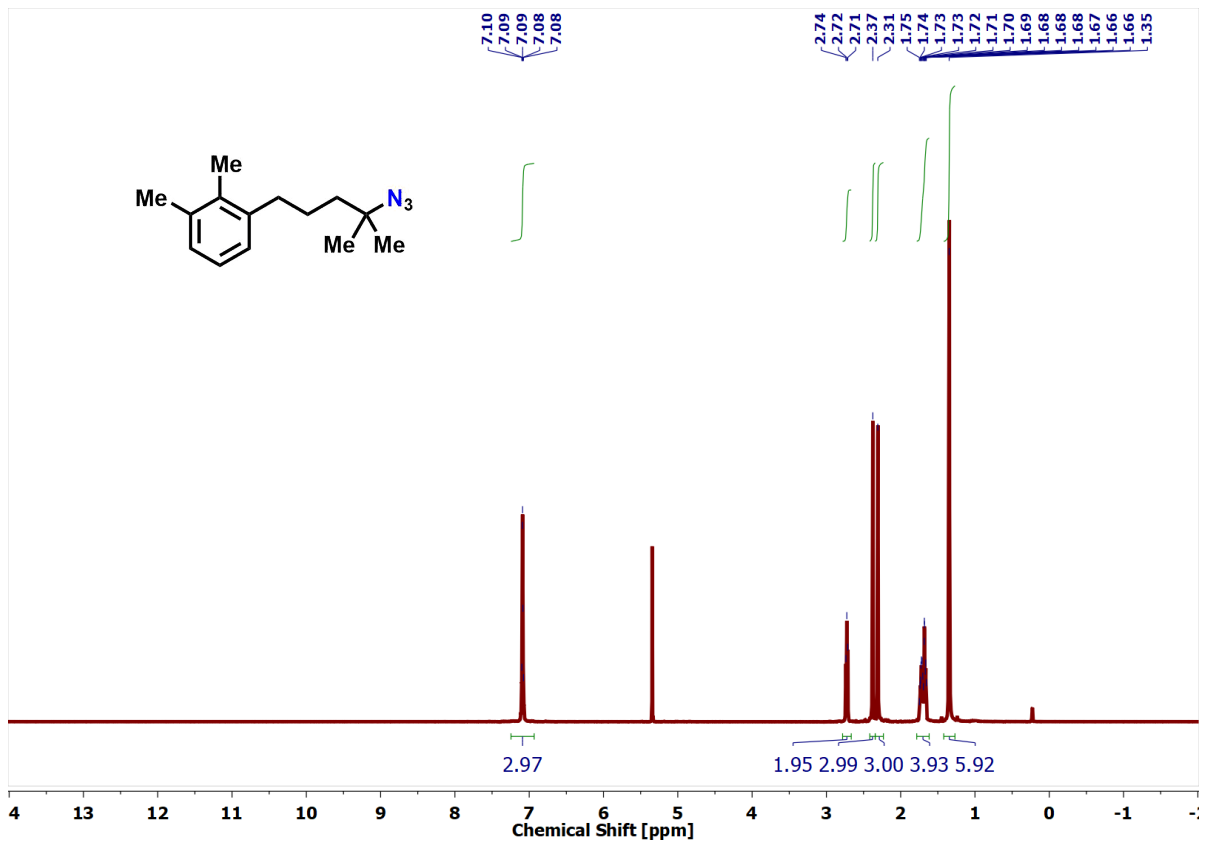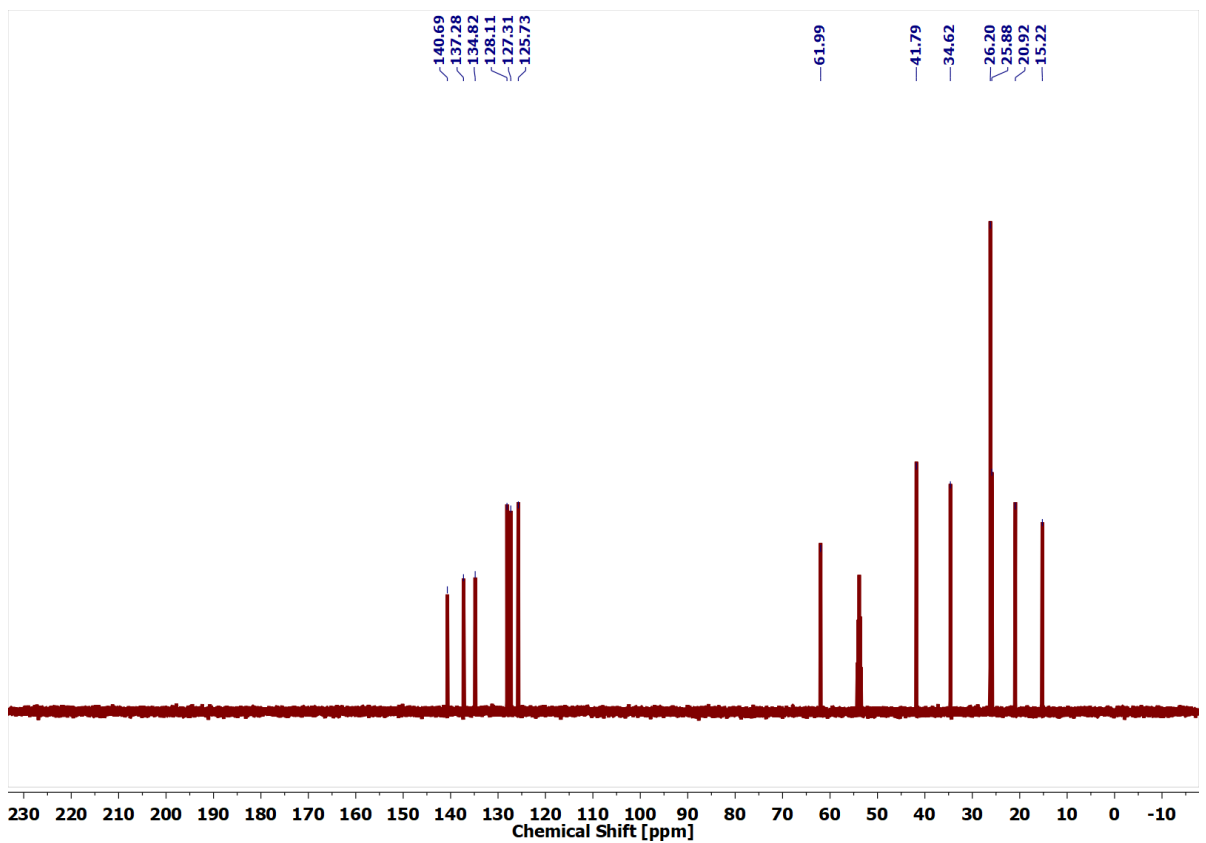

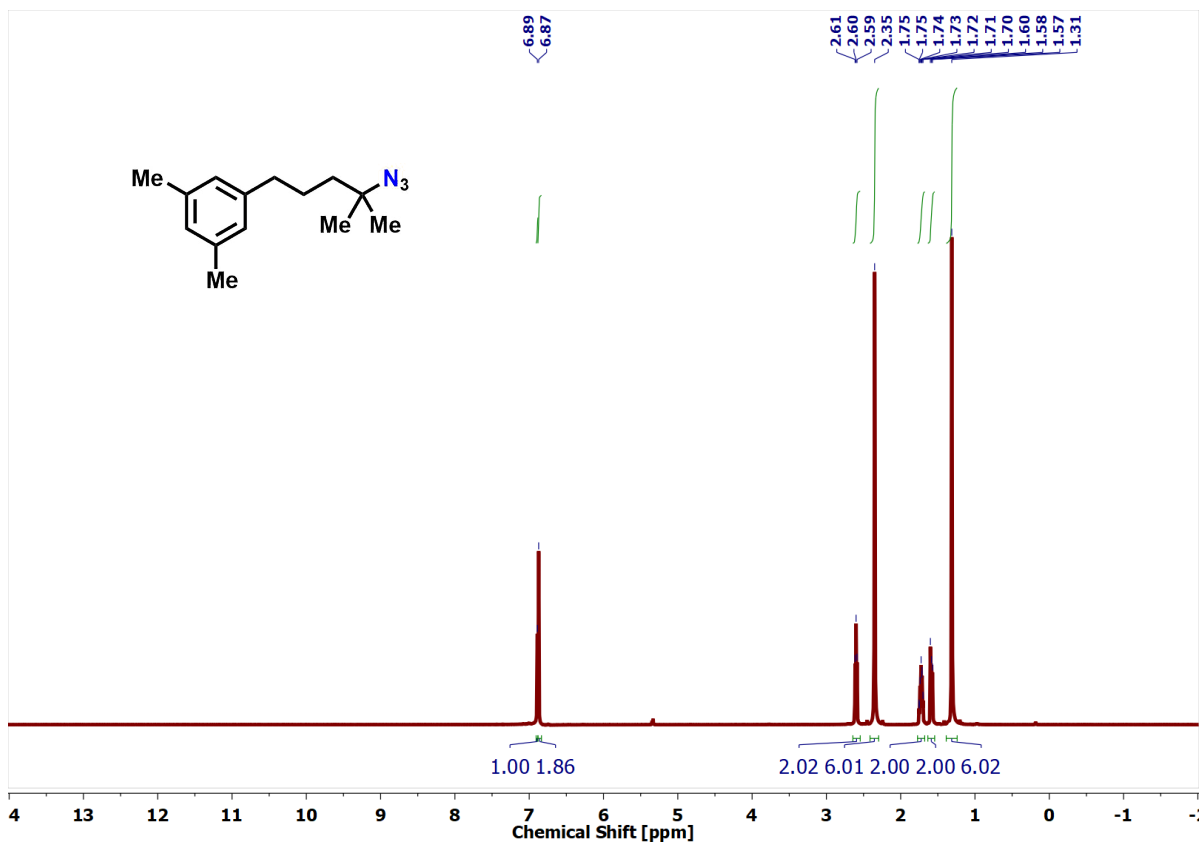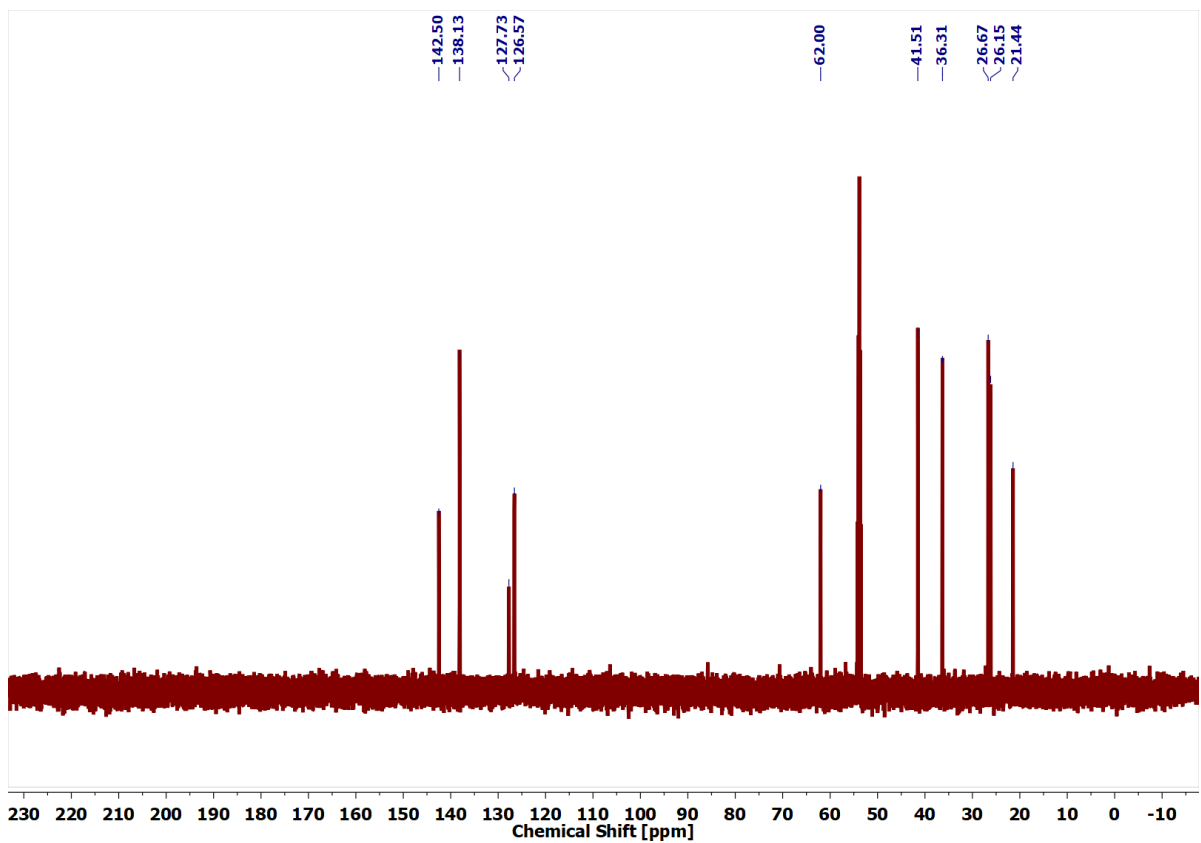

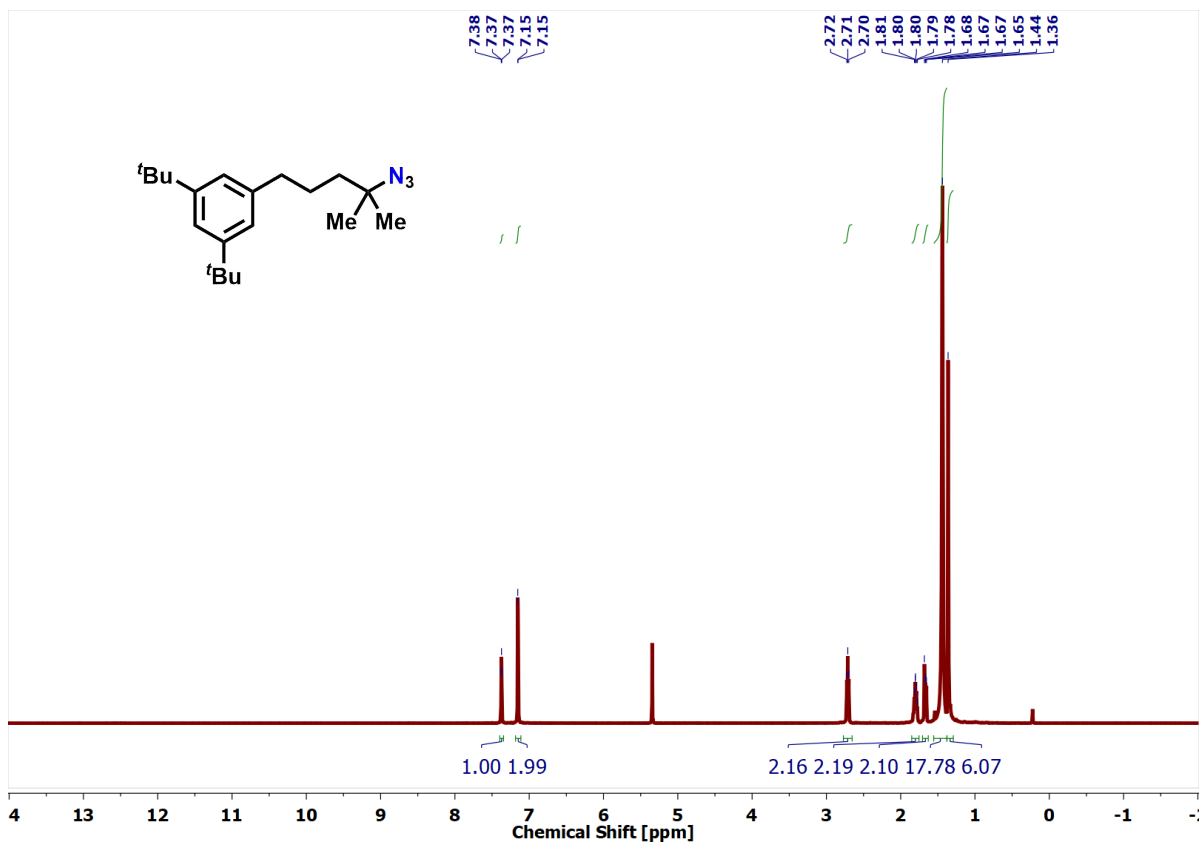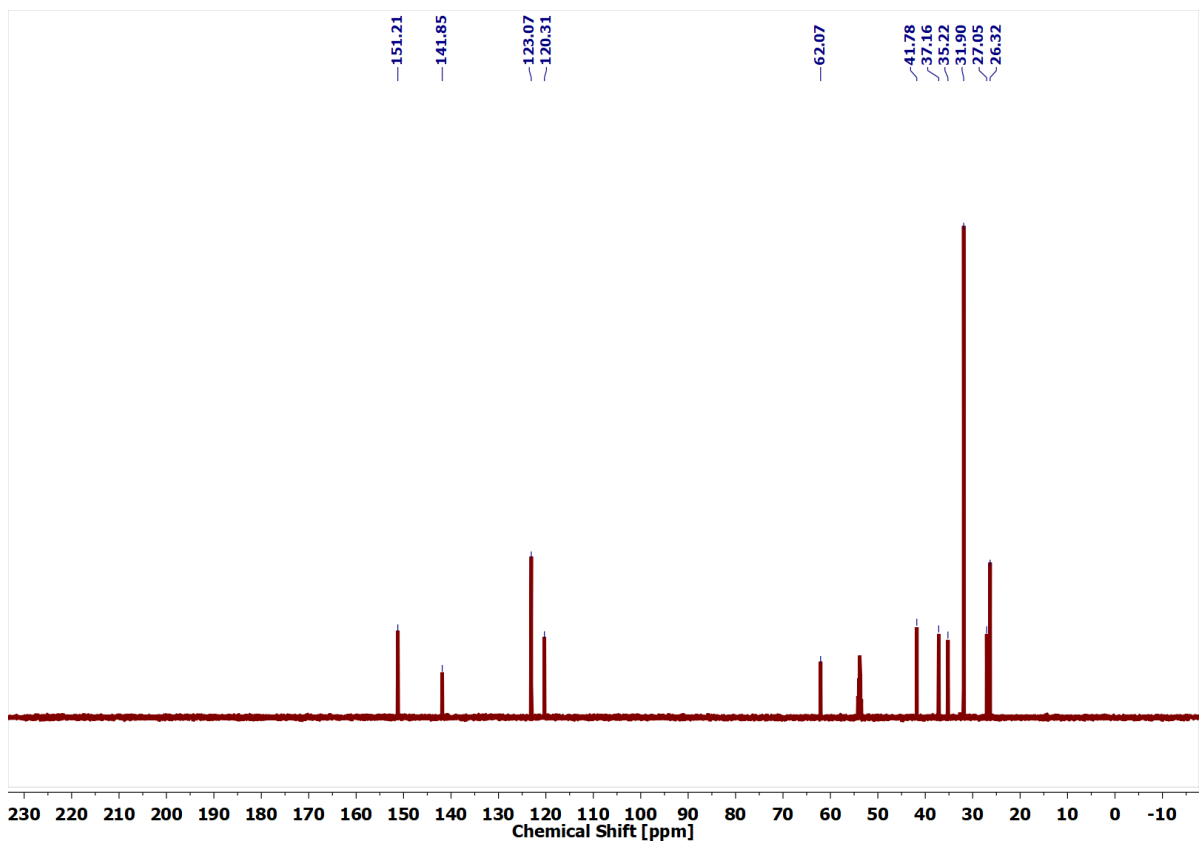



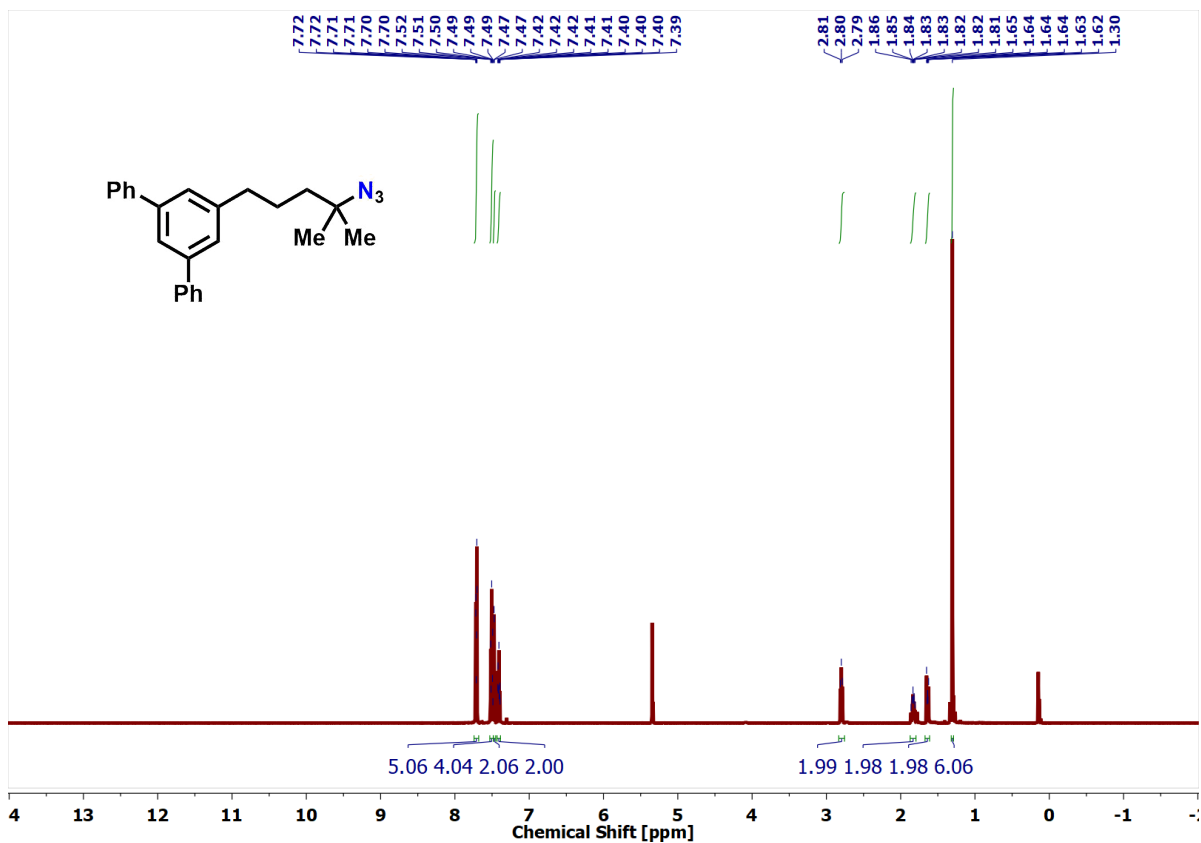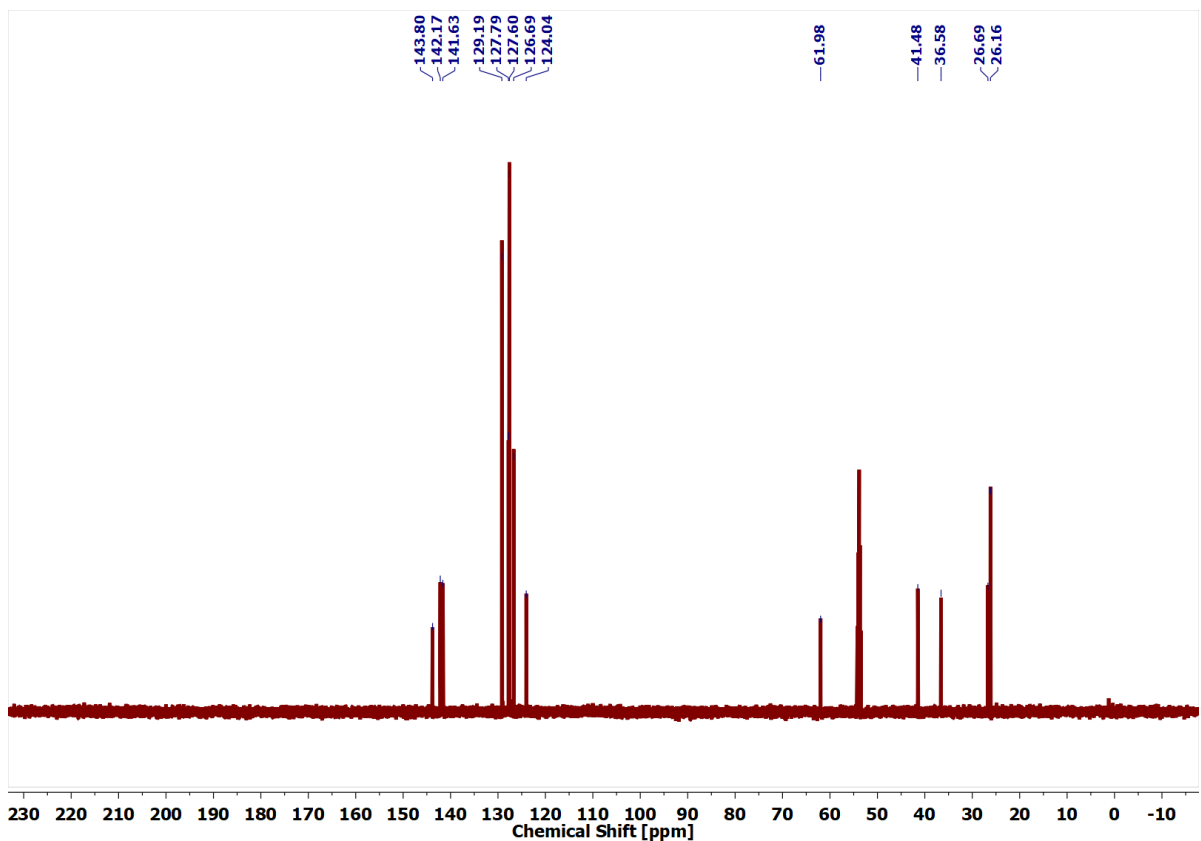

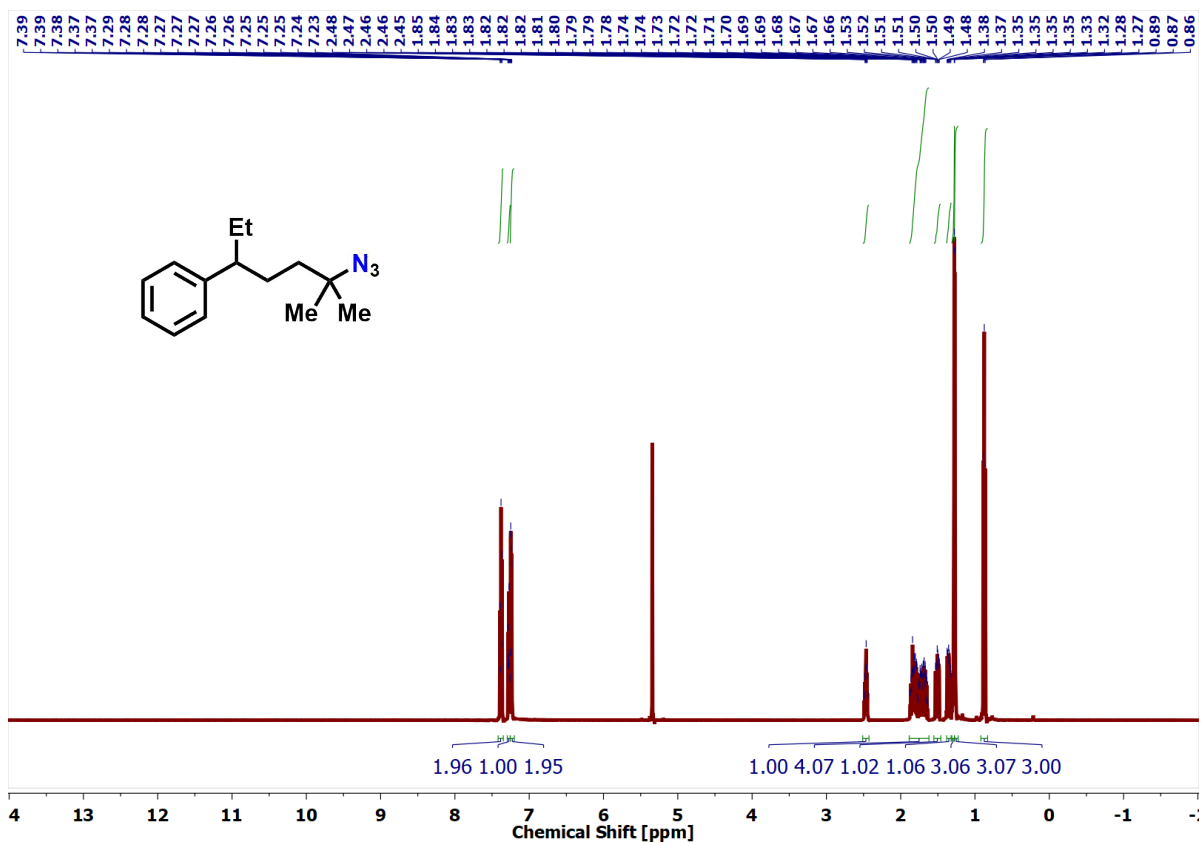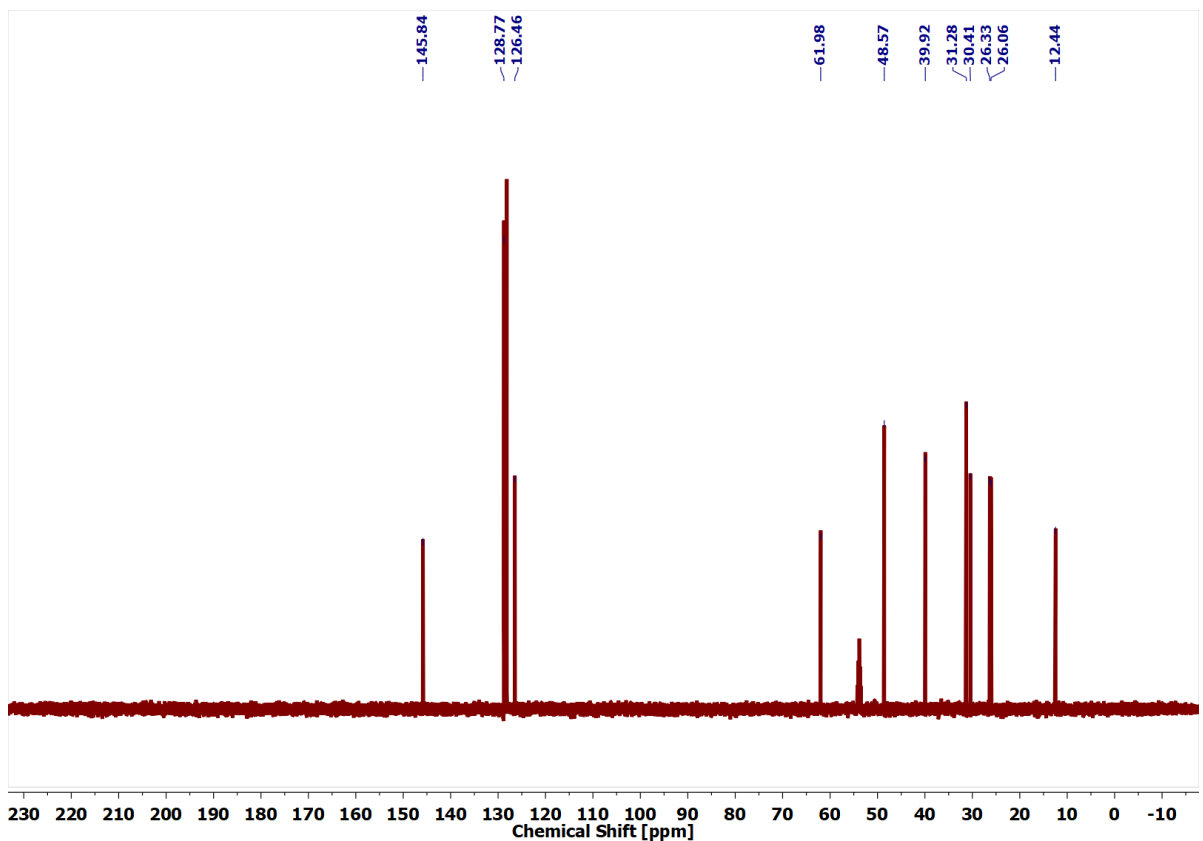

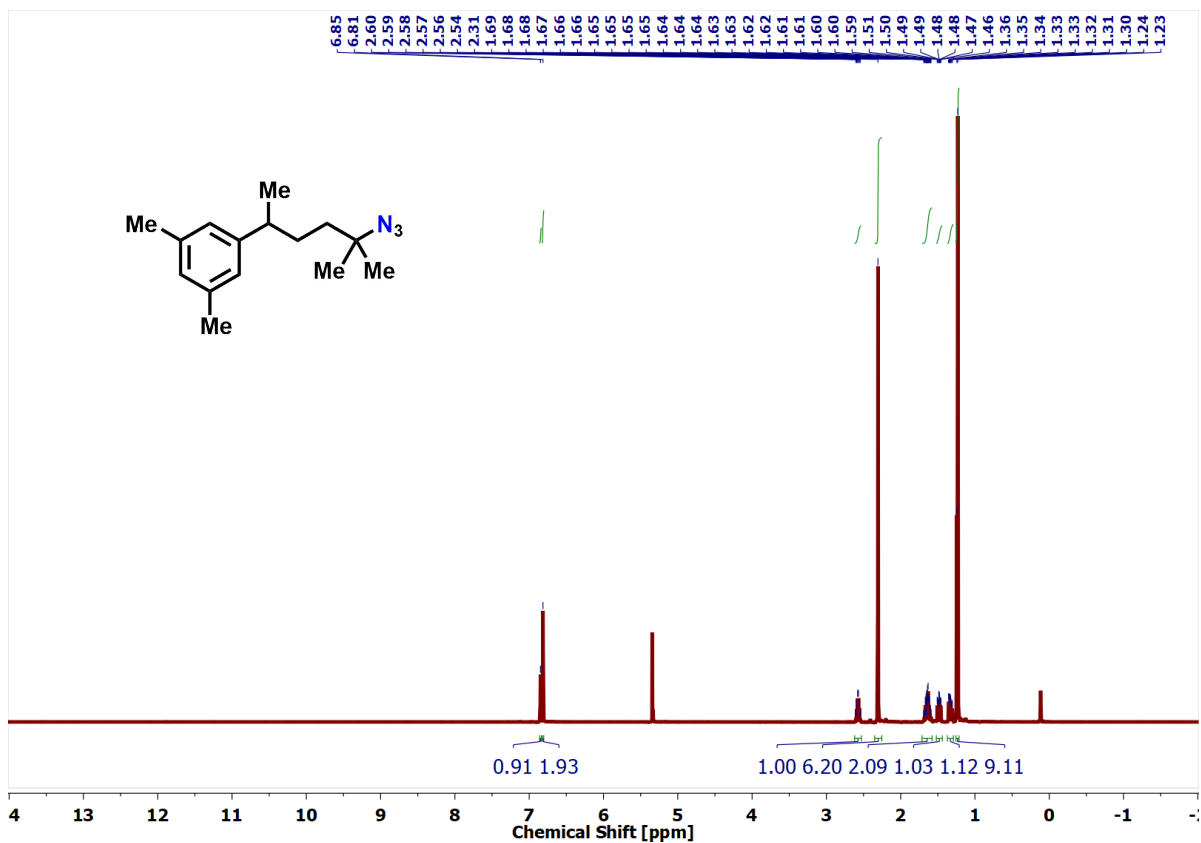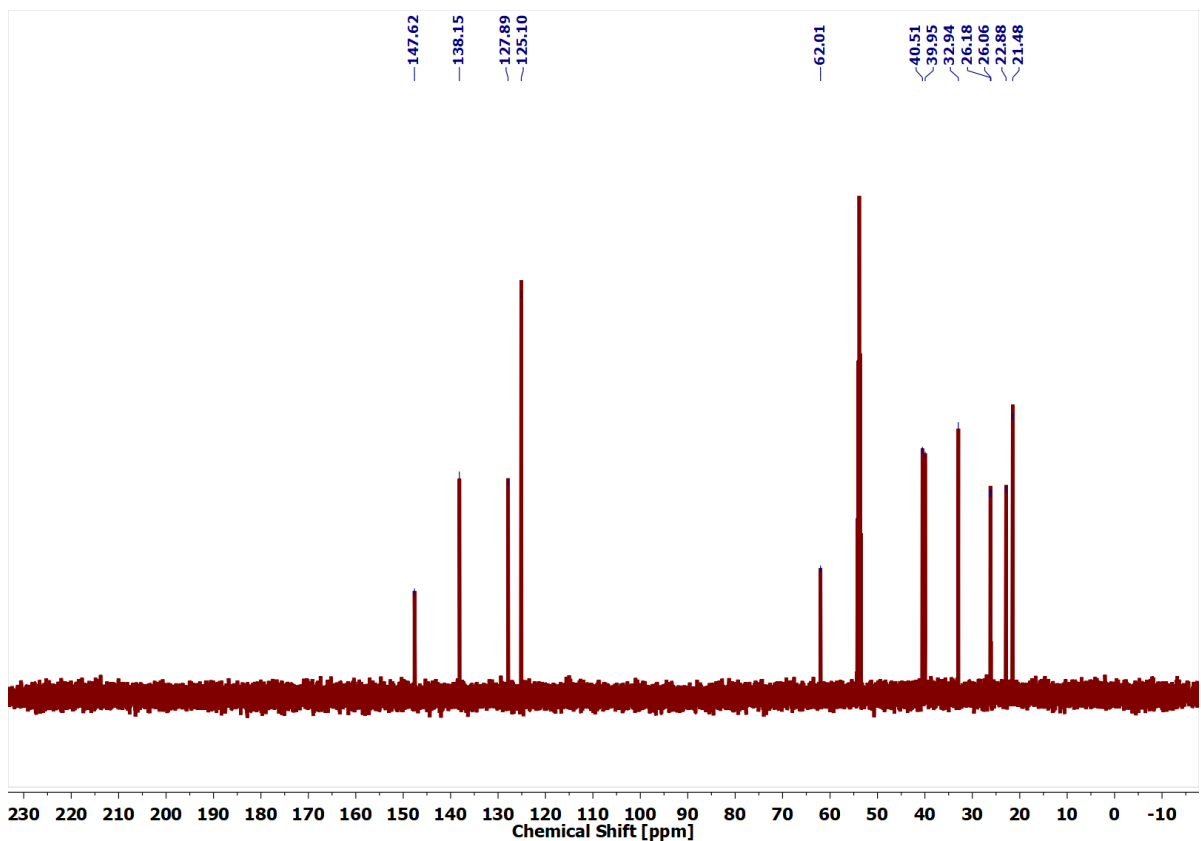

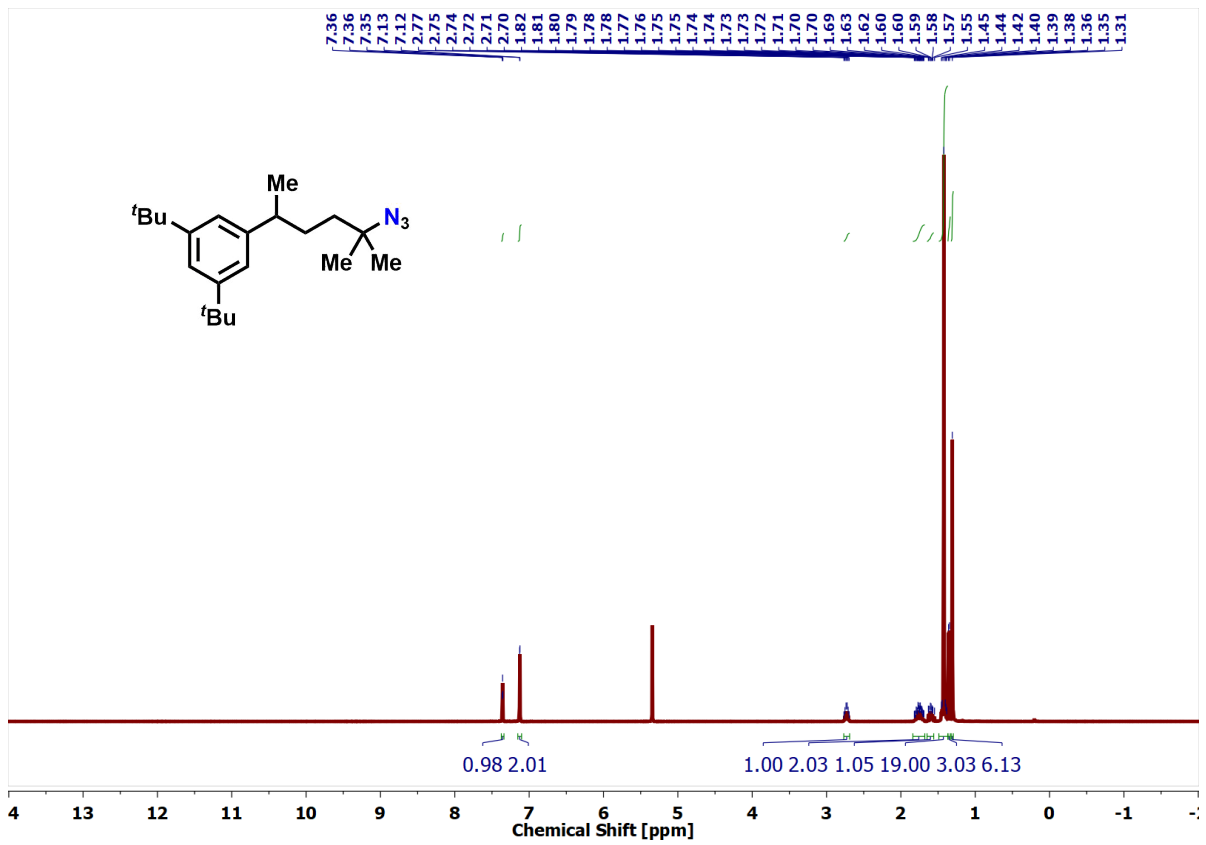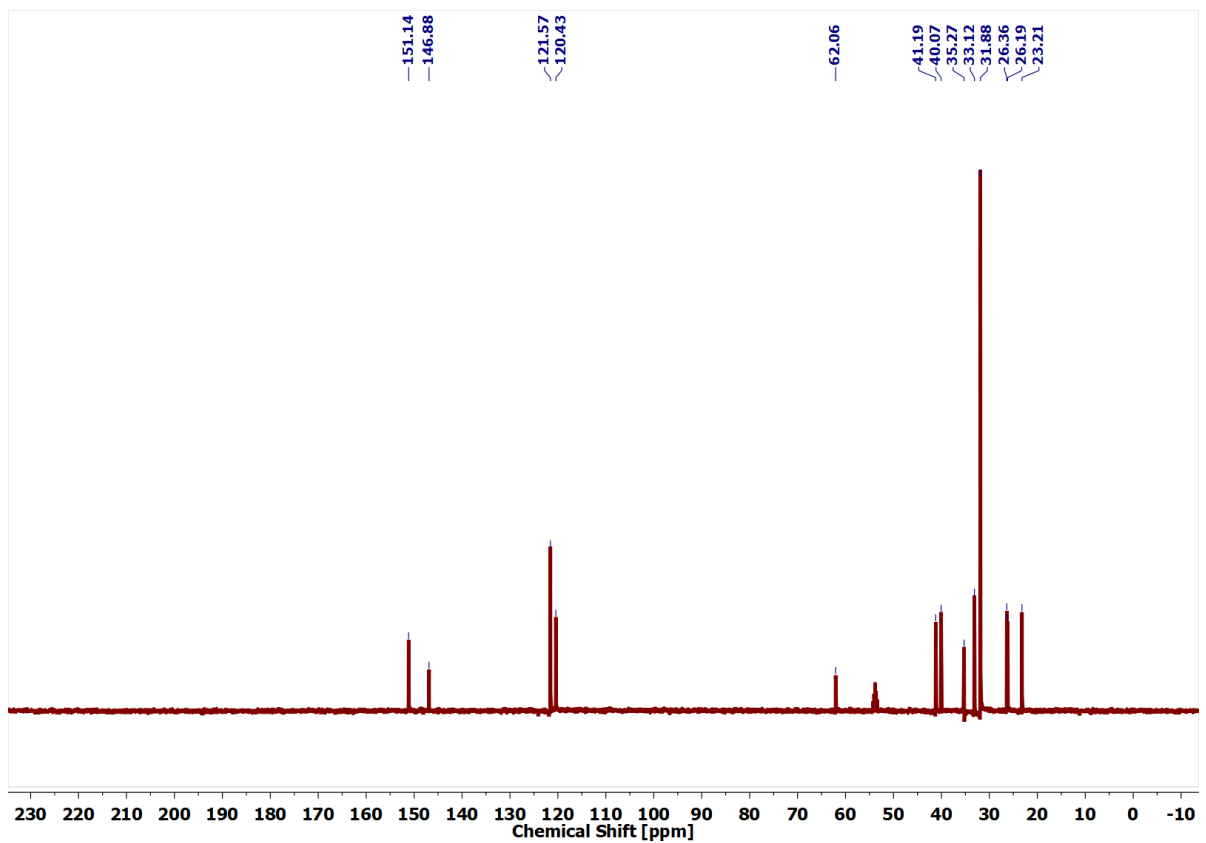

# NMR spectra of pyrrolidines

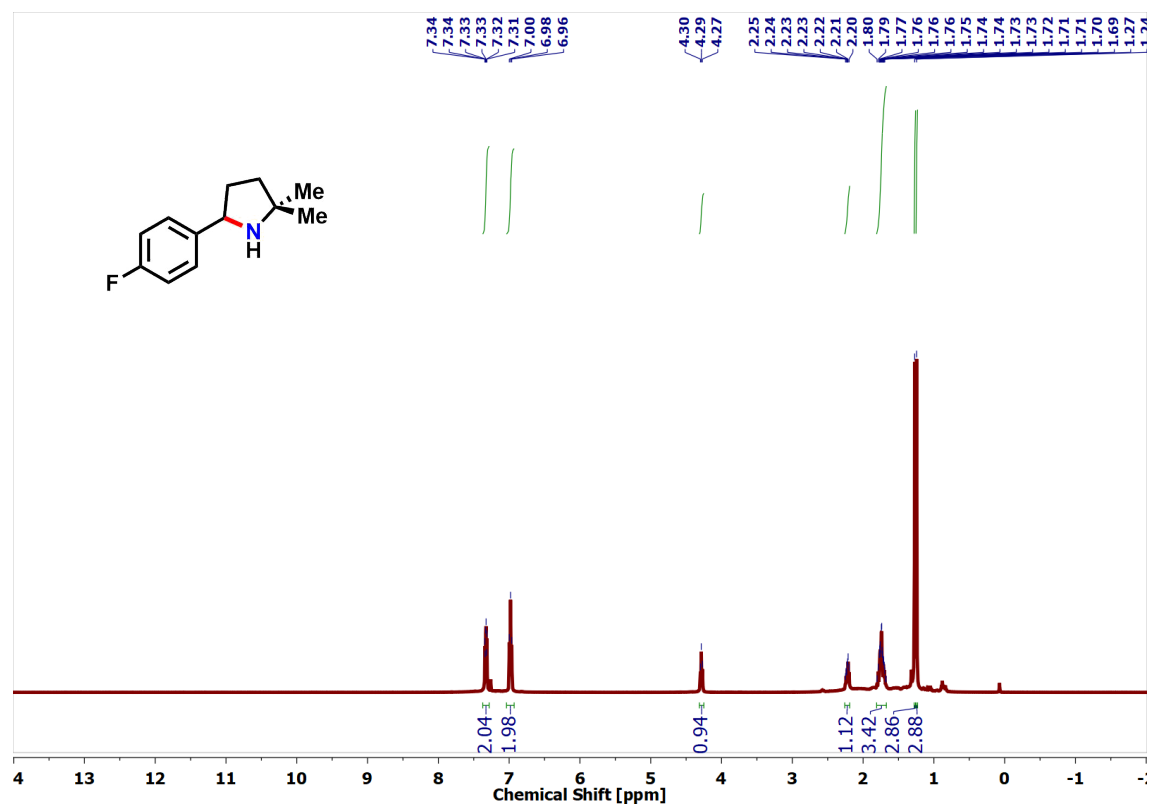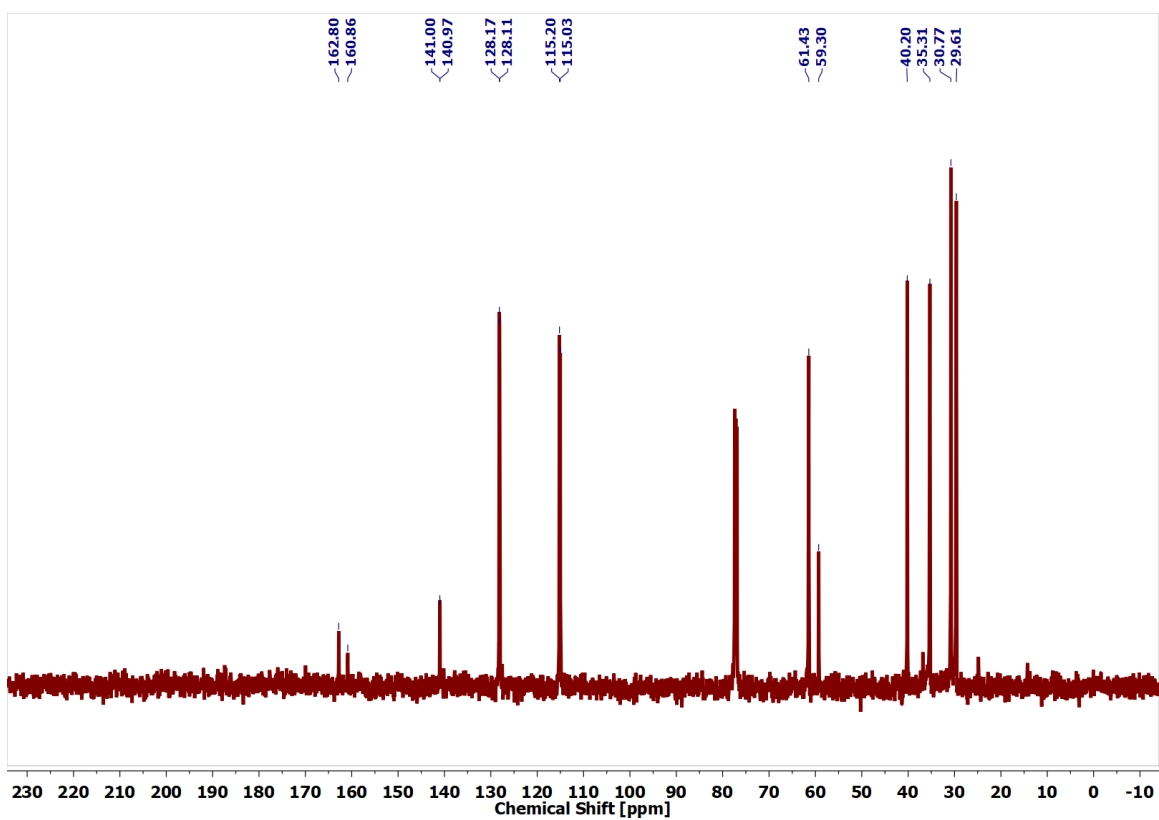

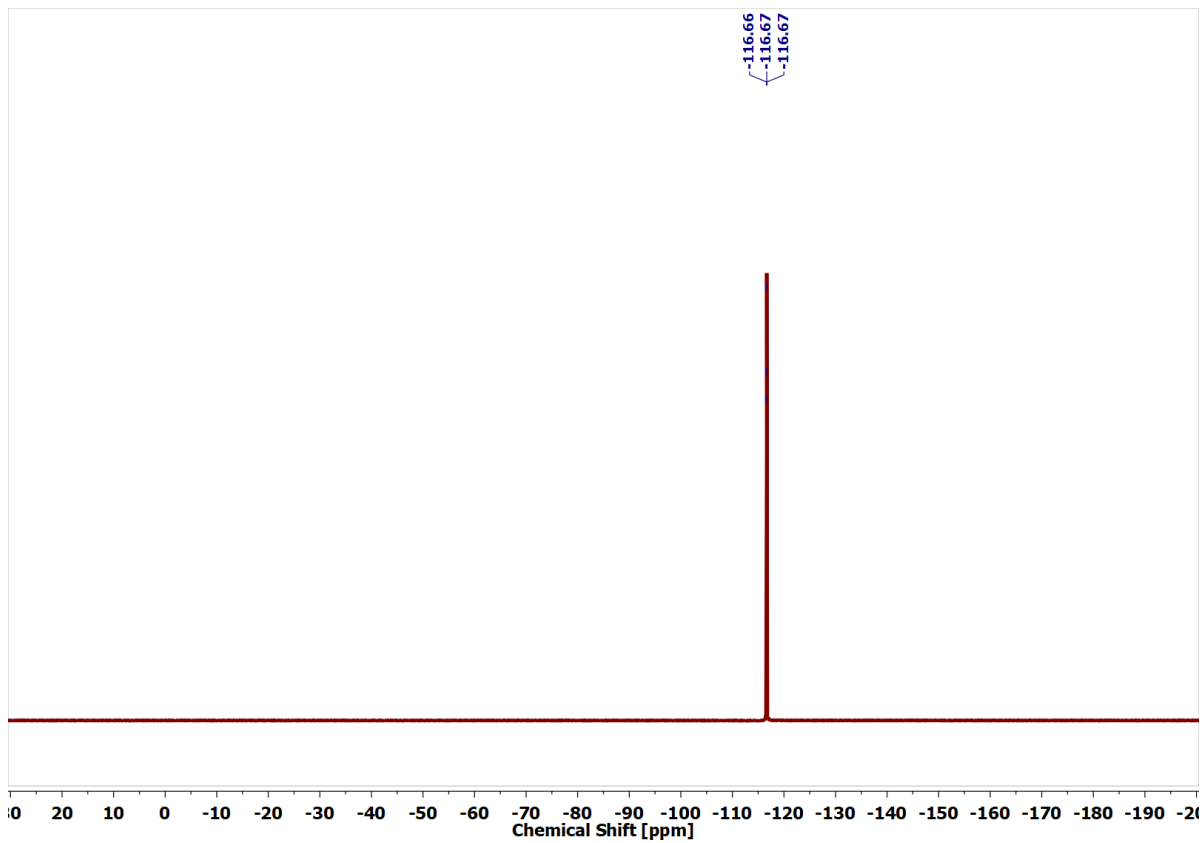

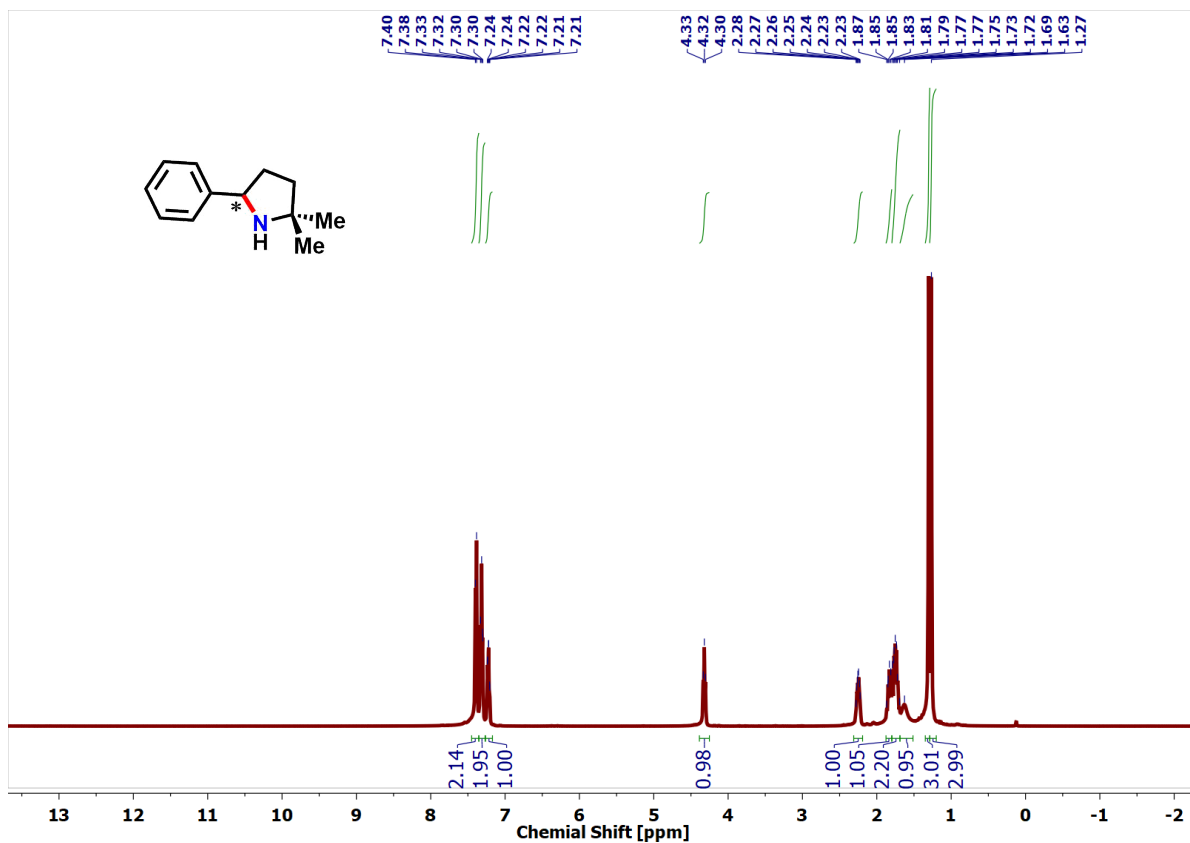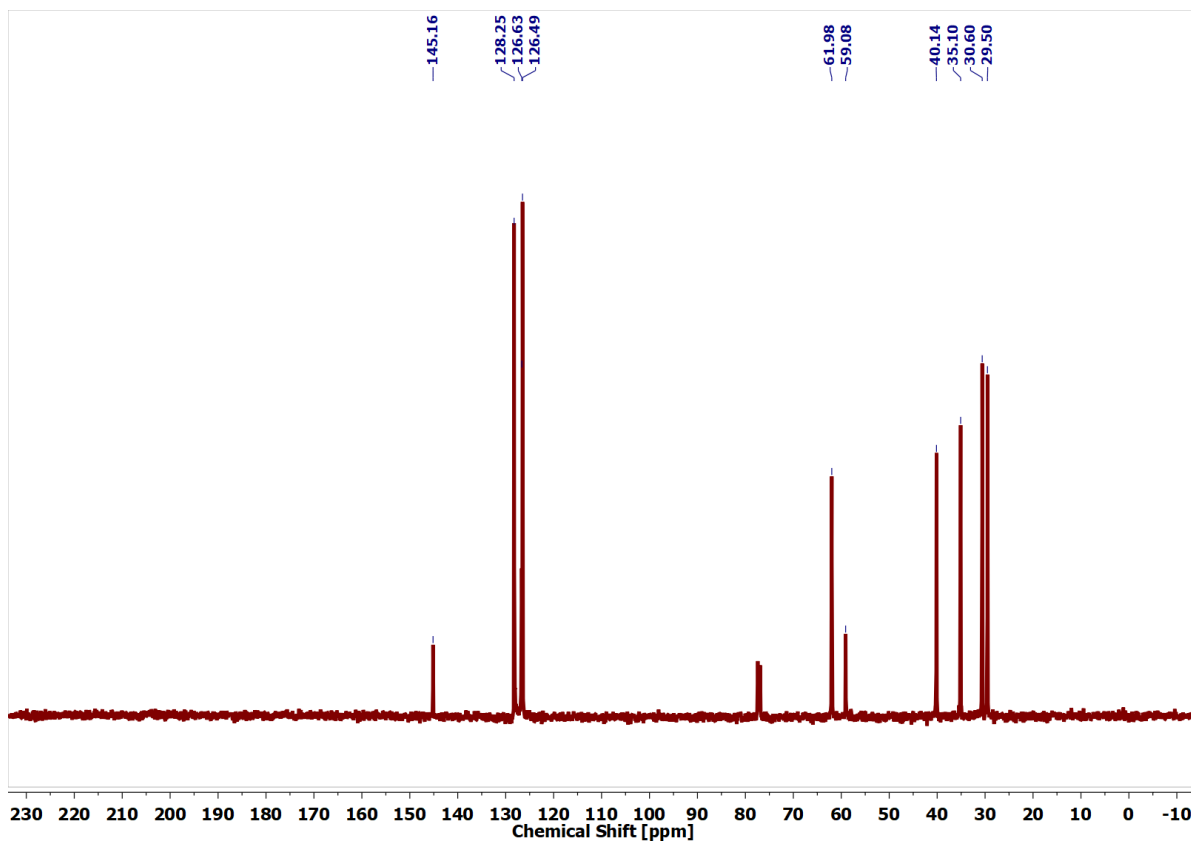

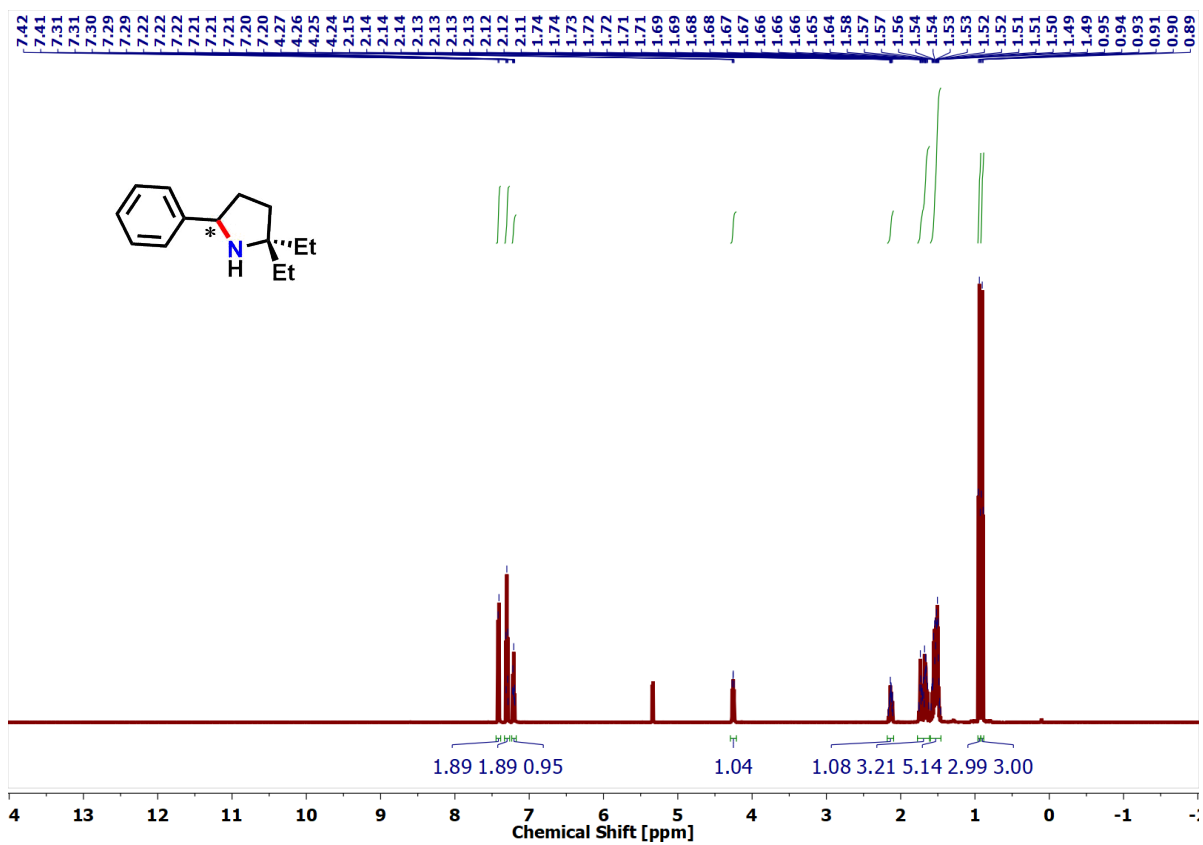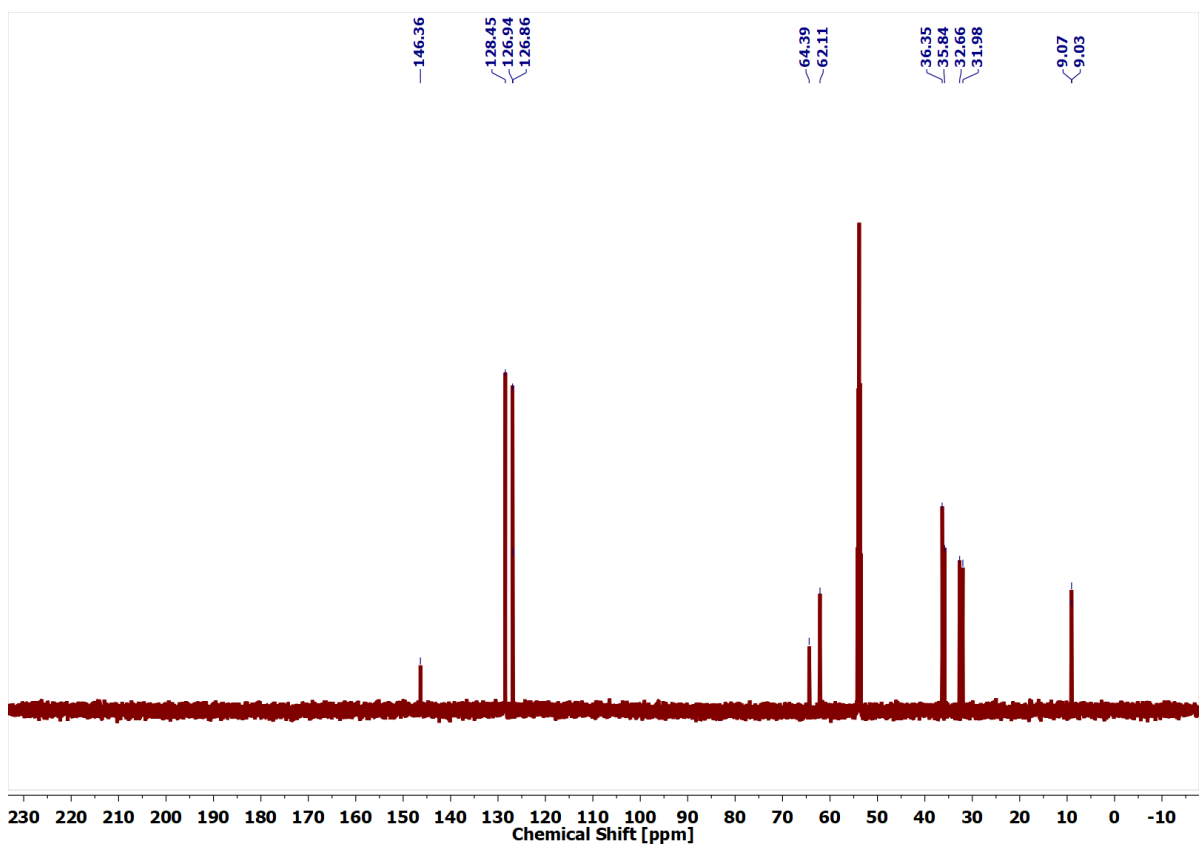



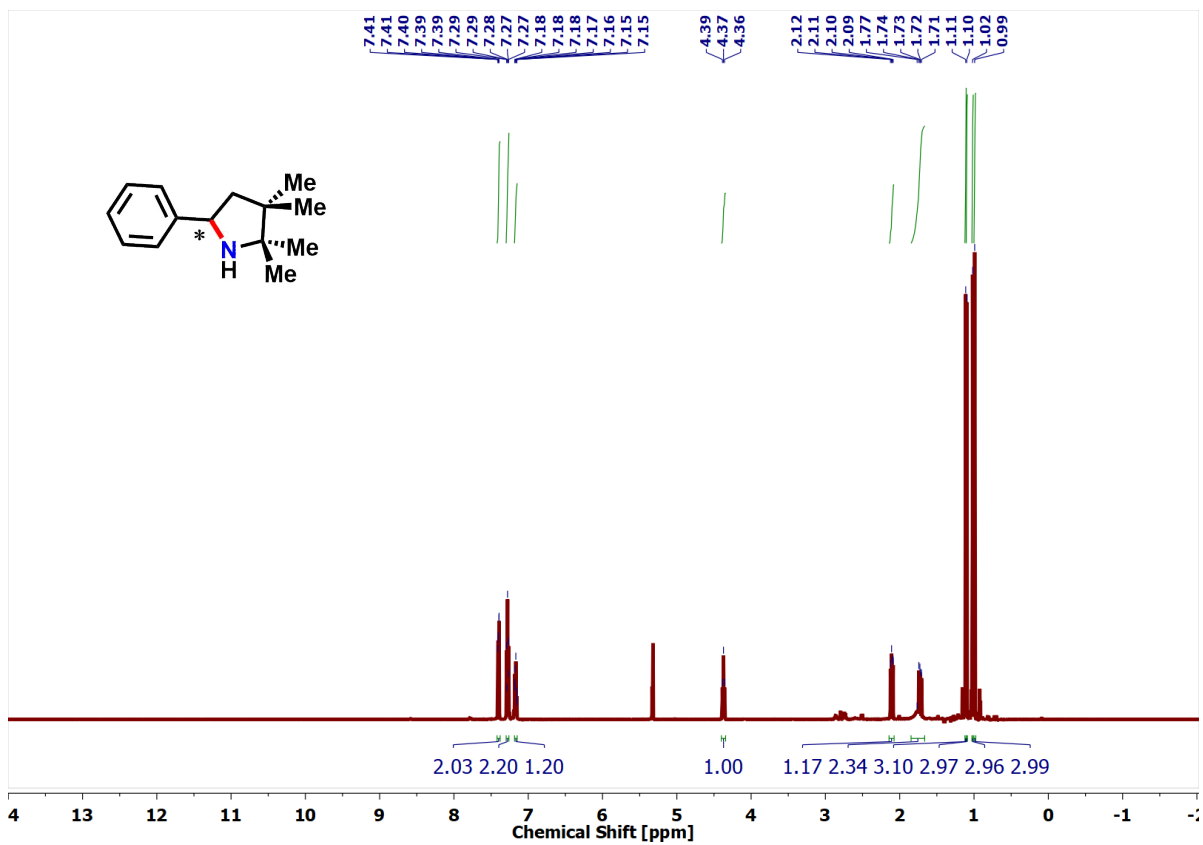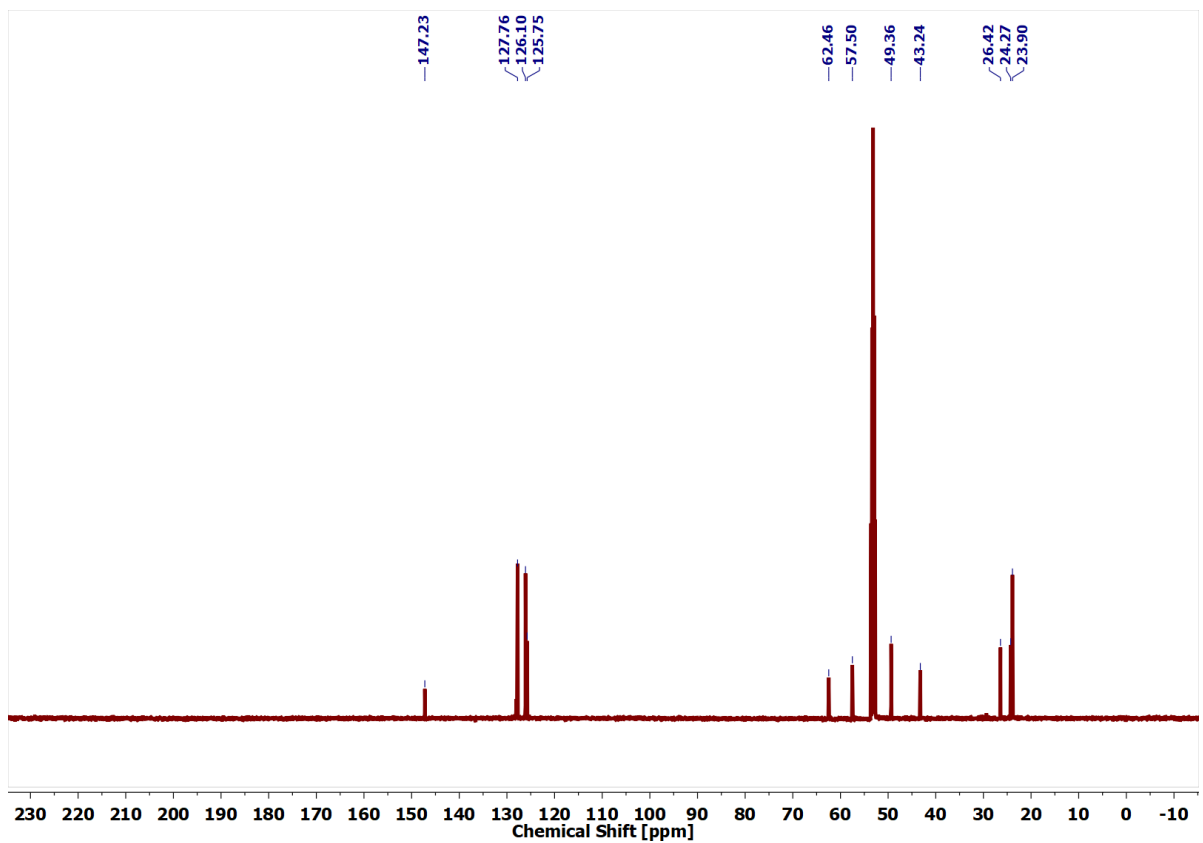

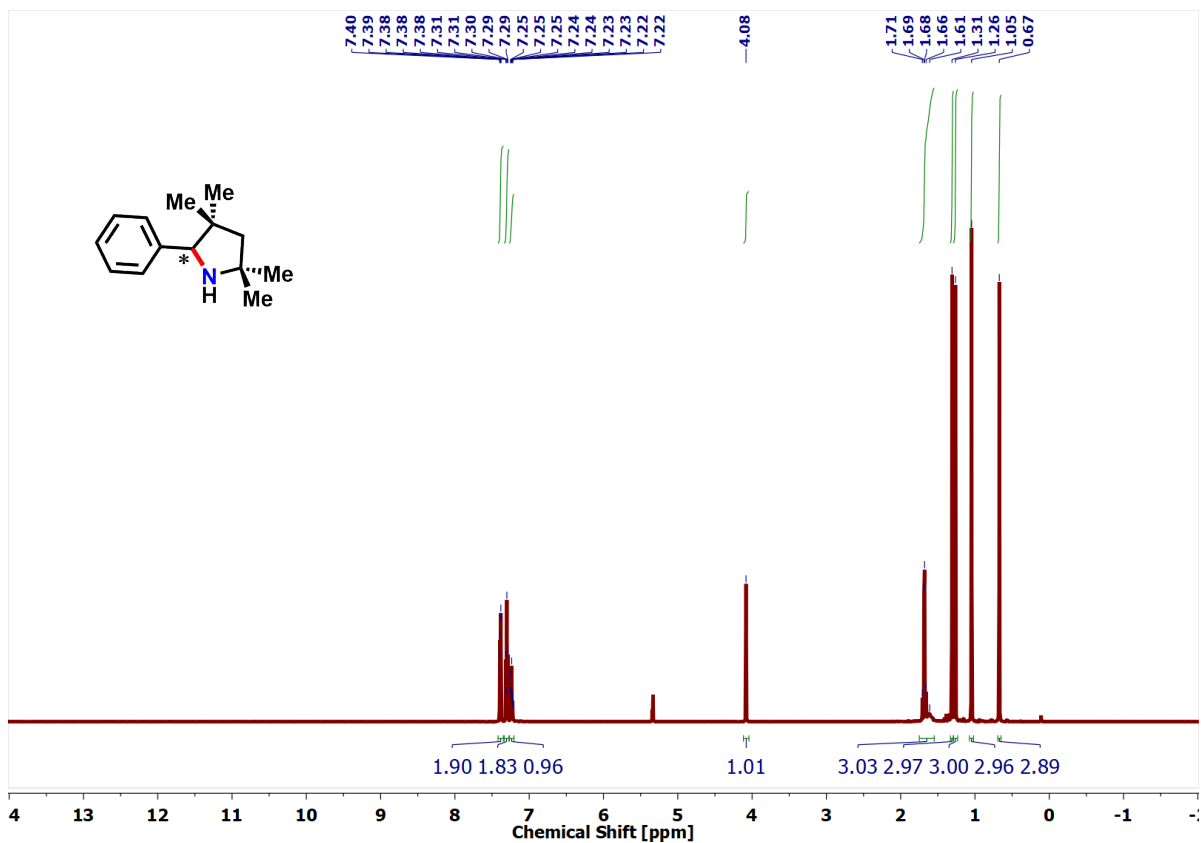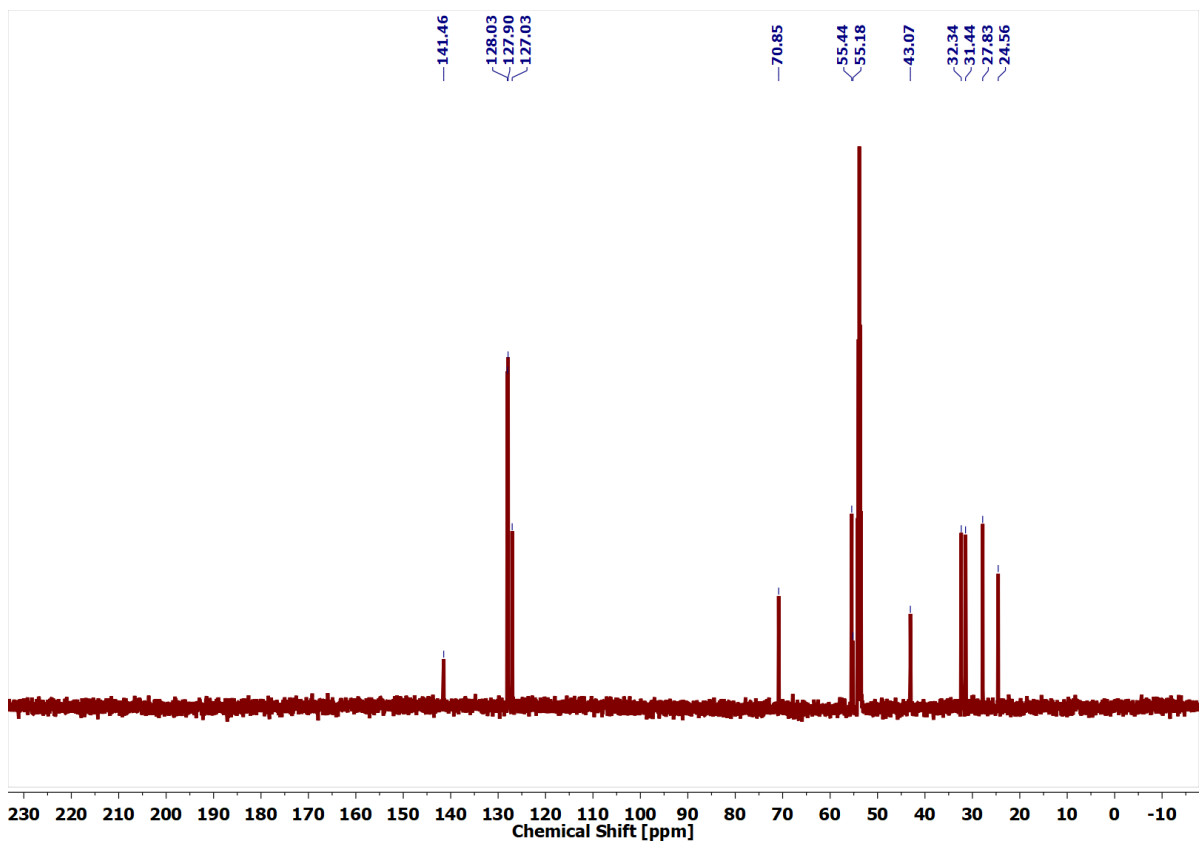

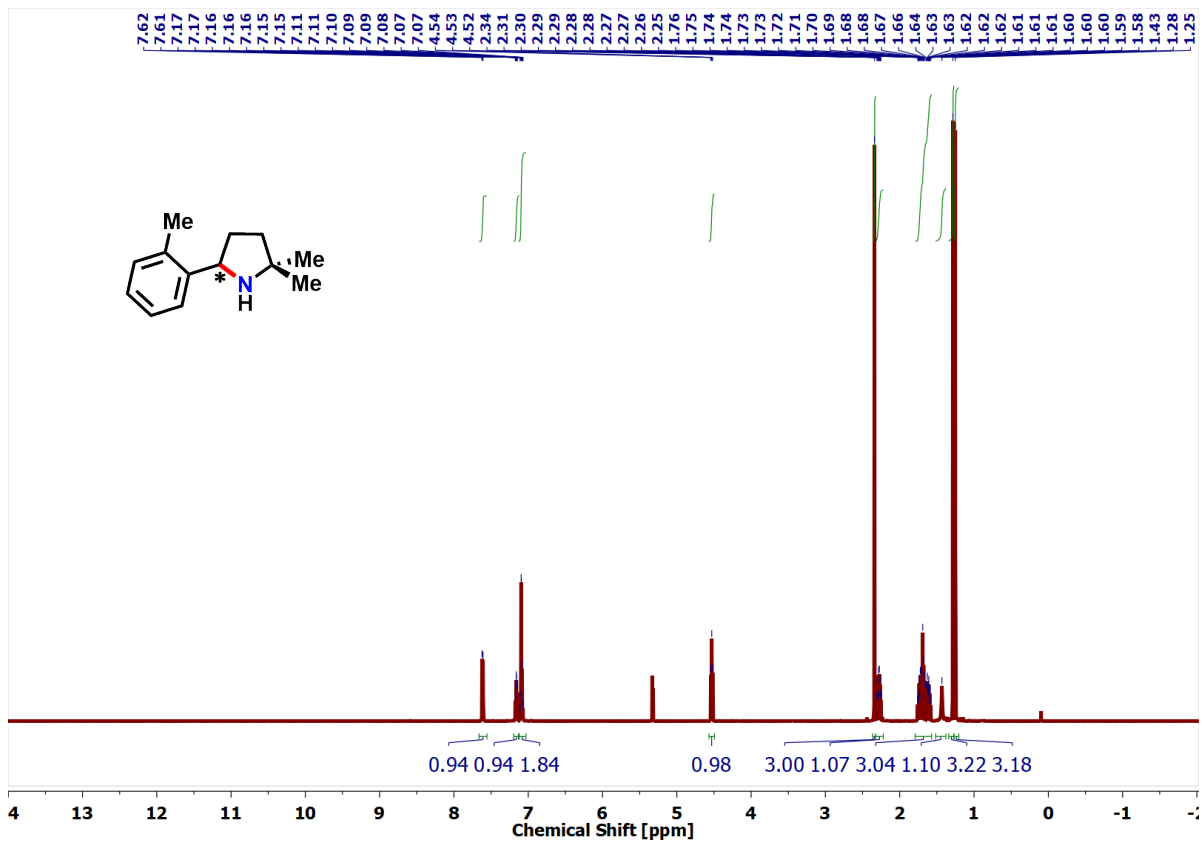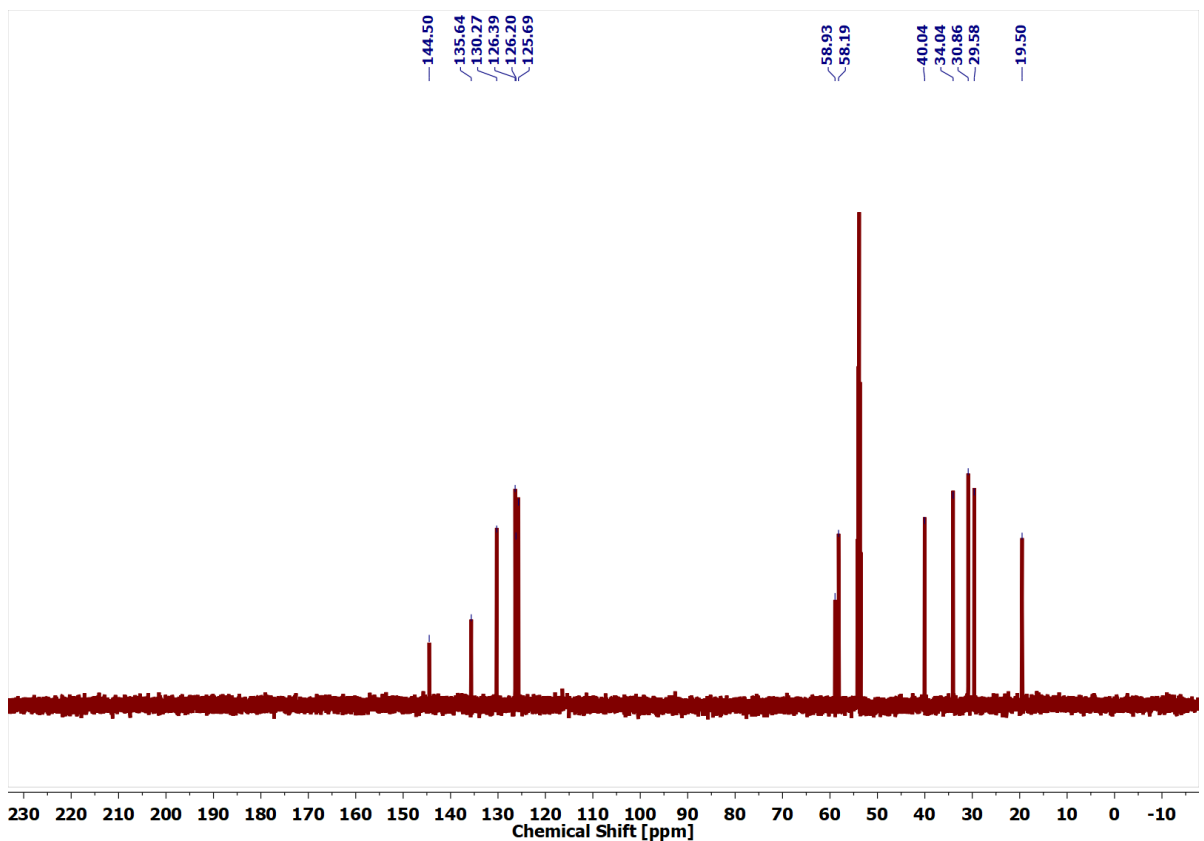

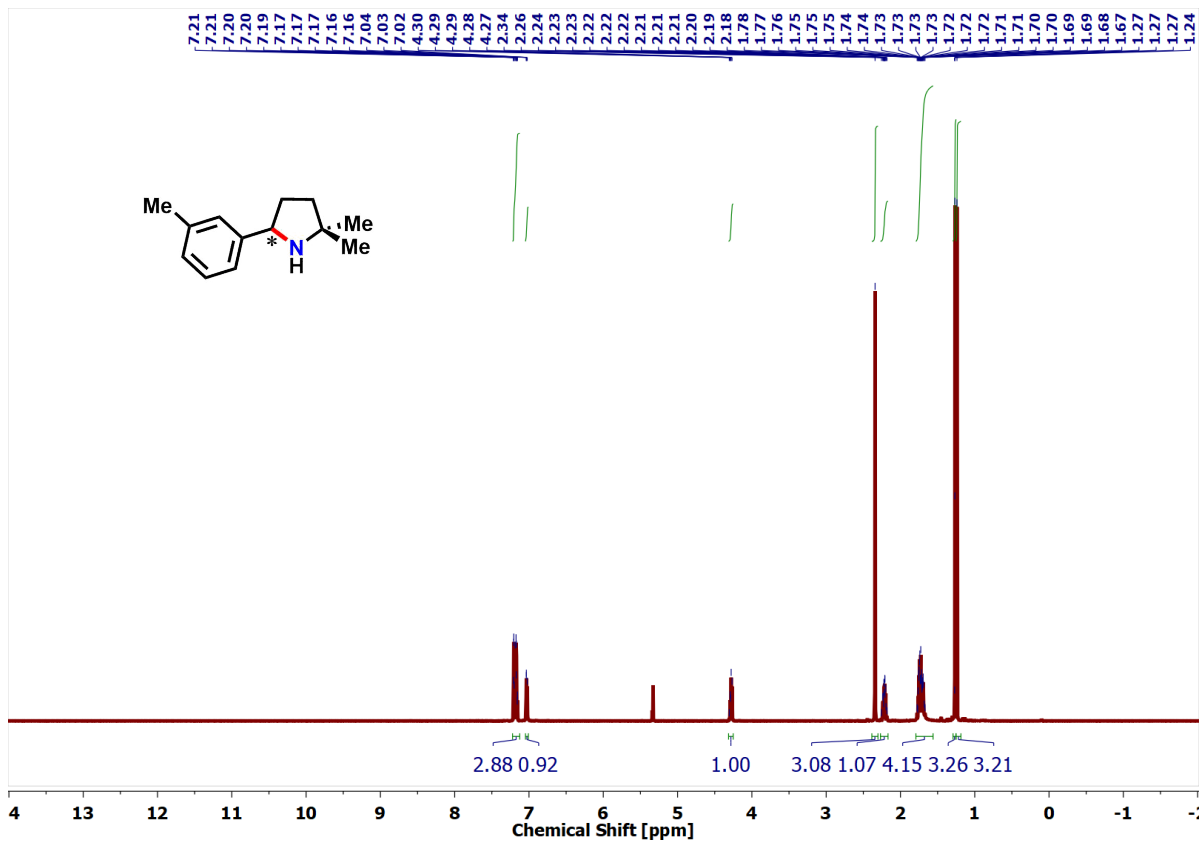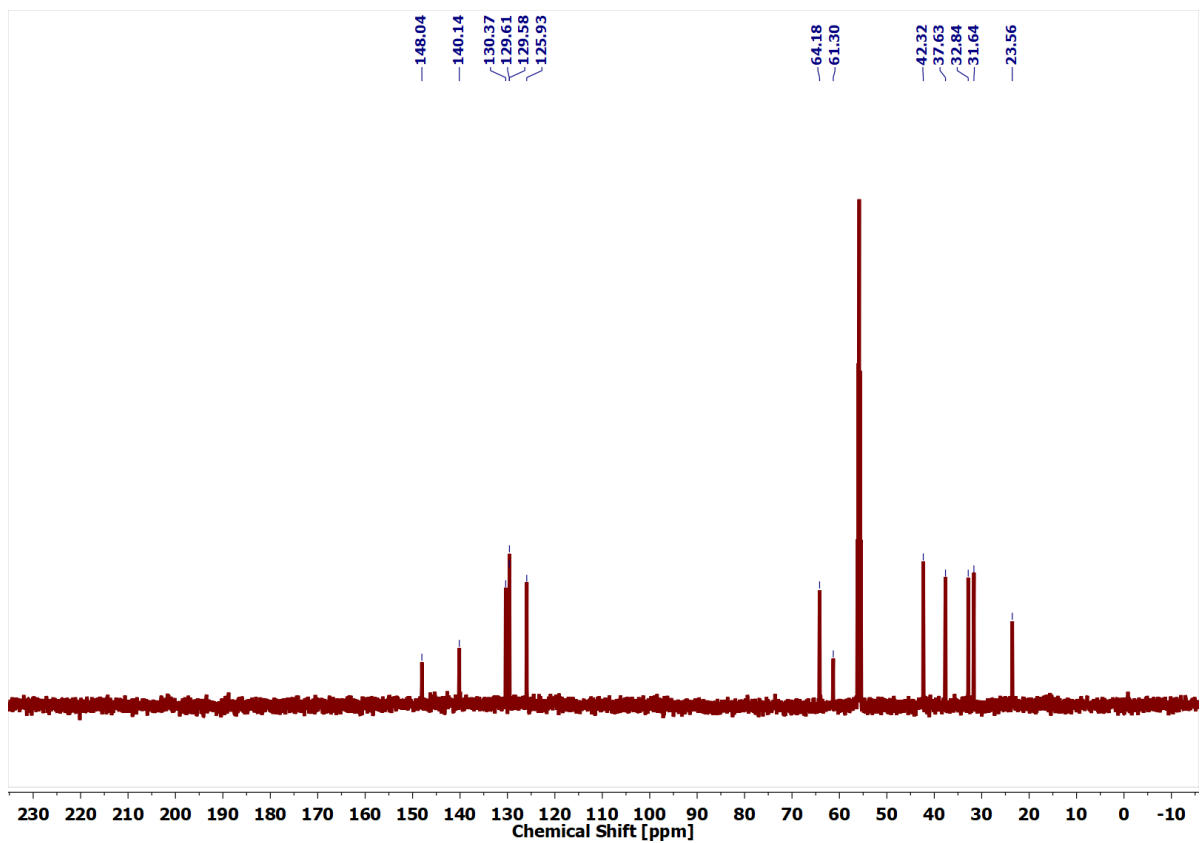

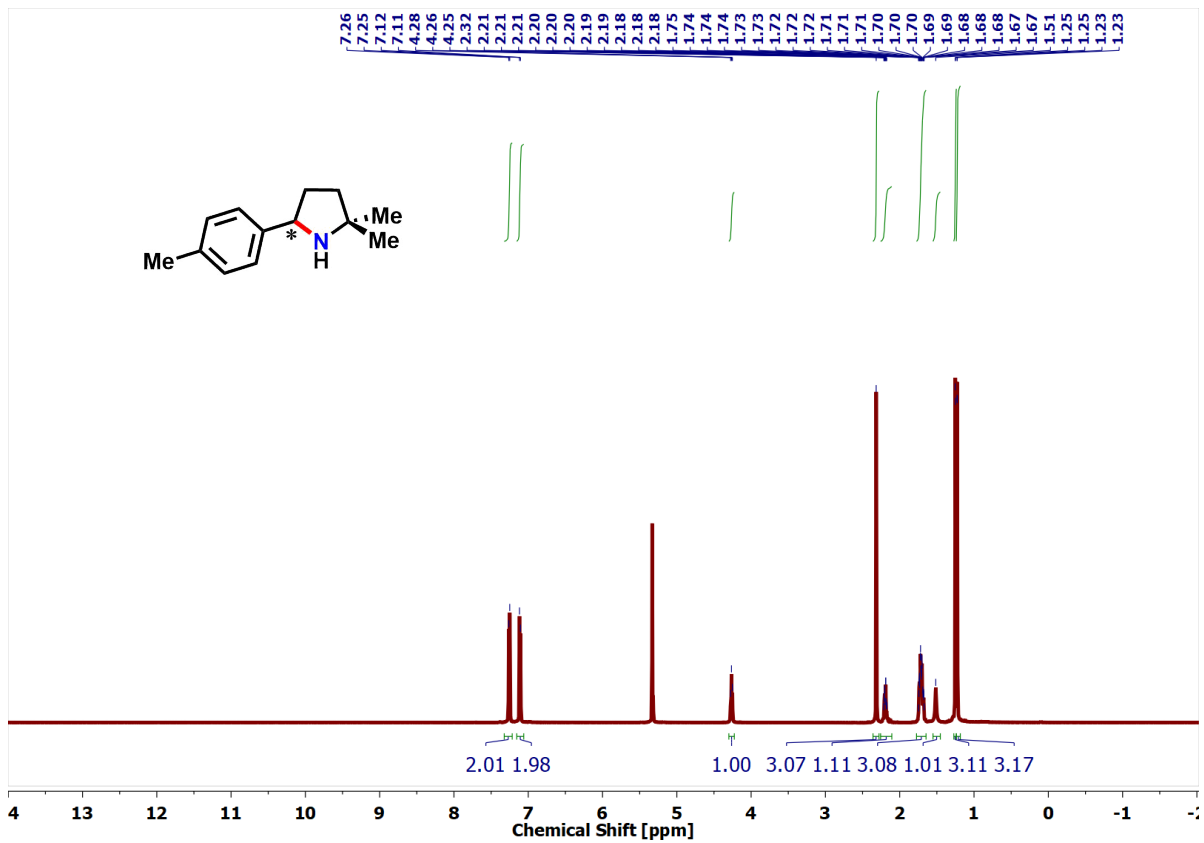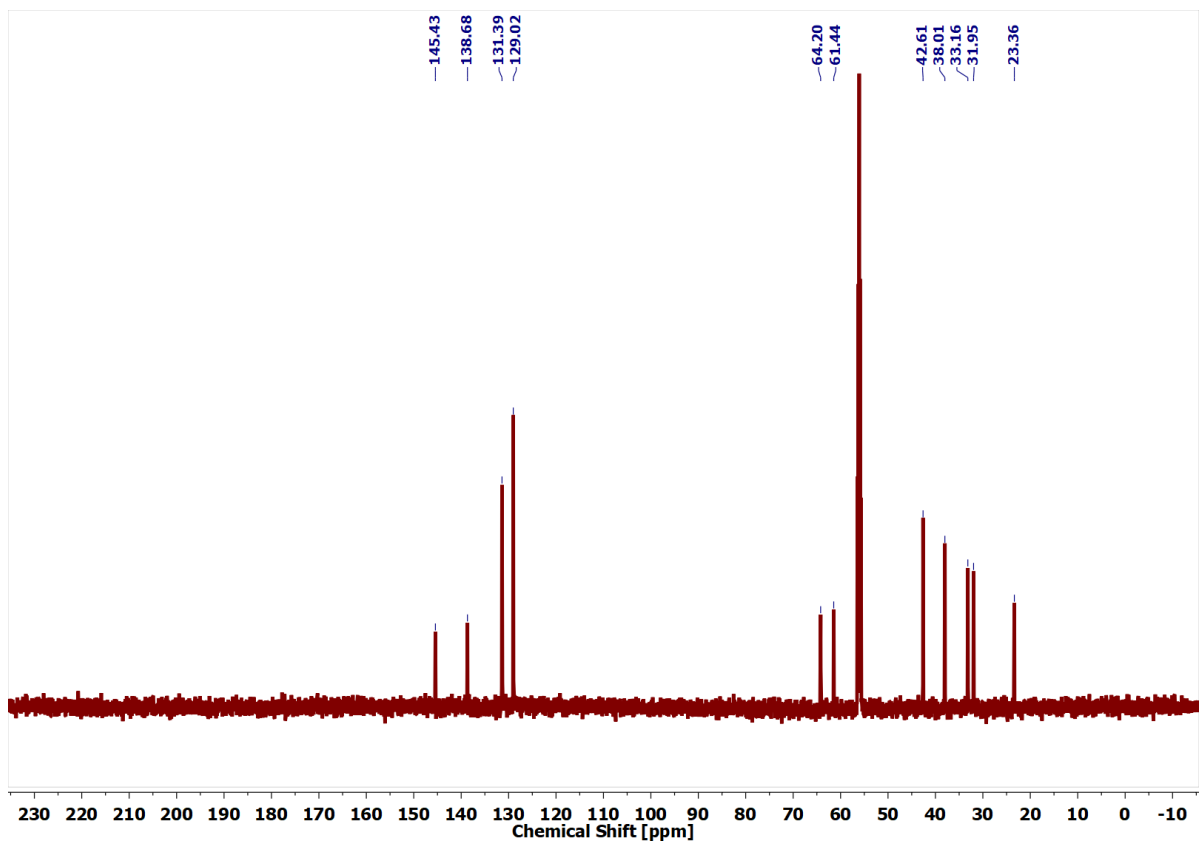

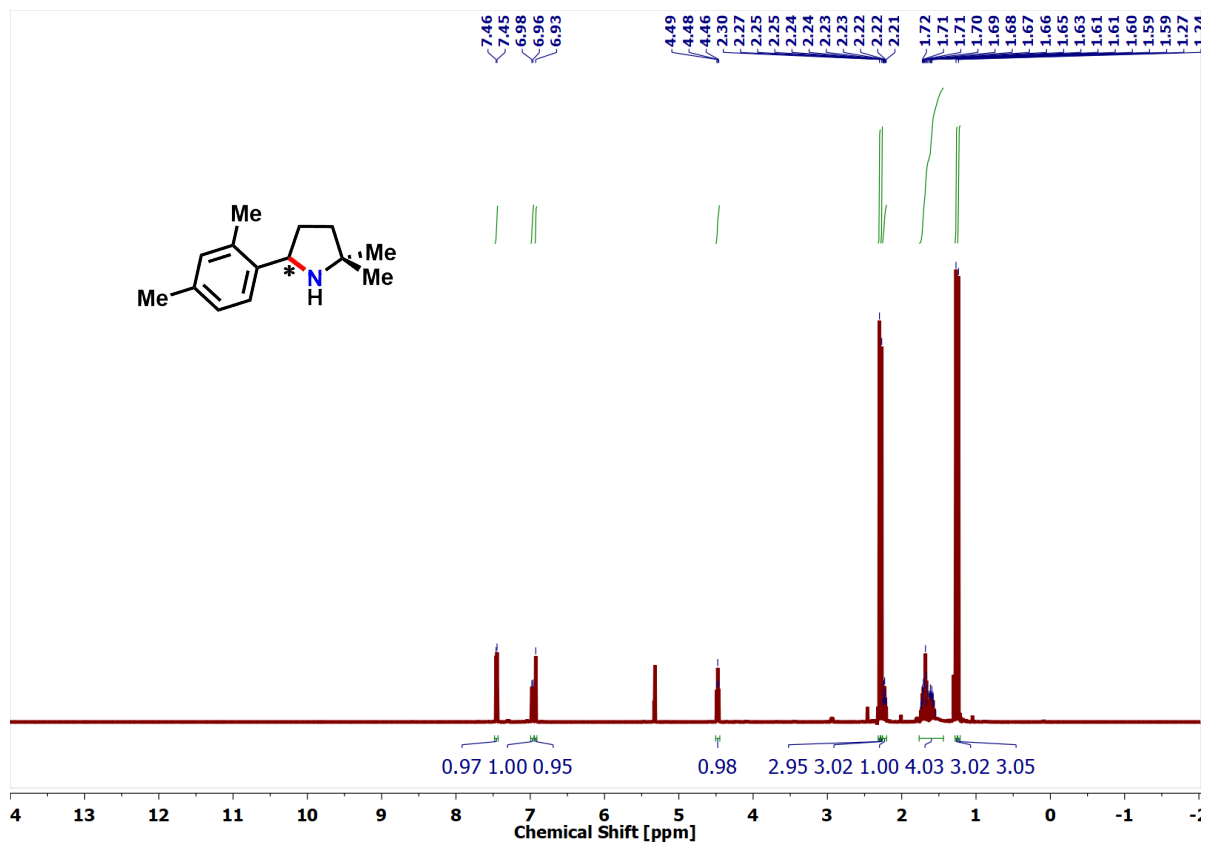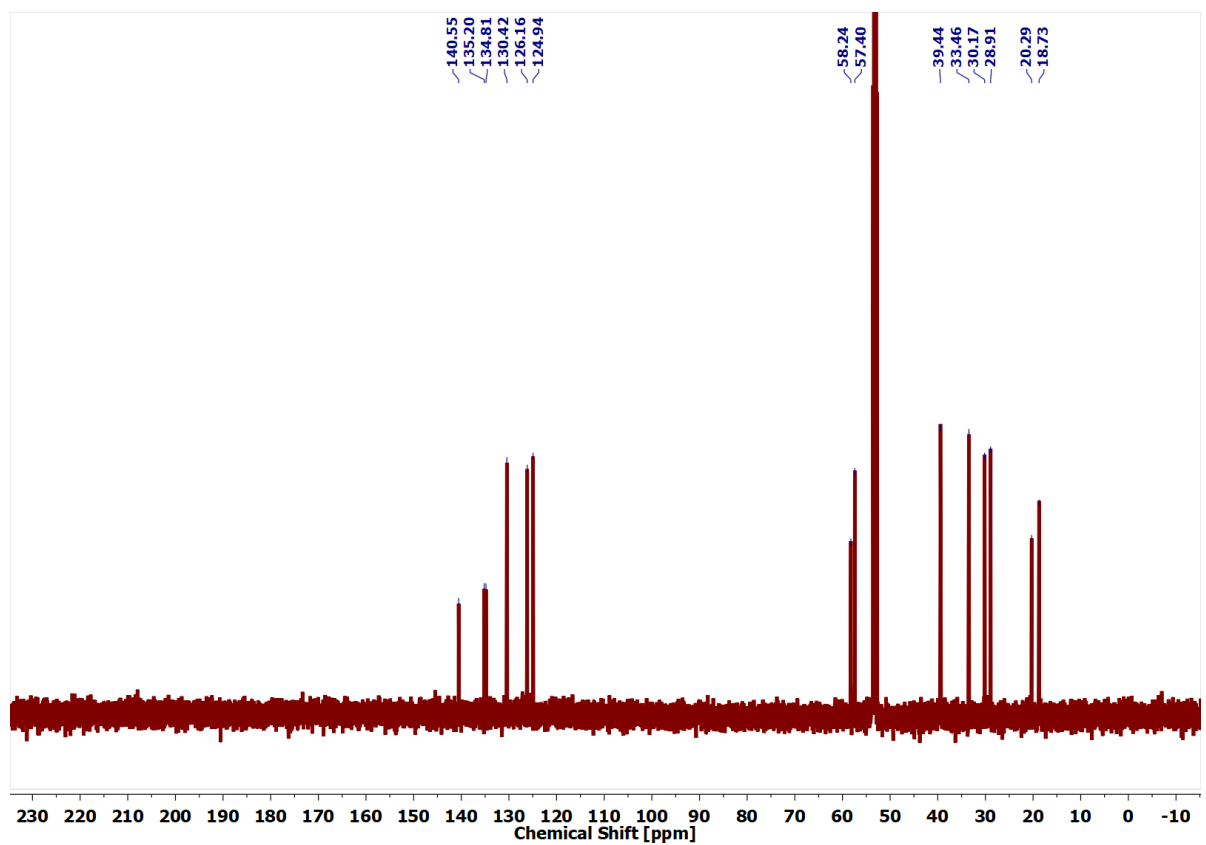

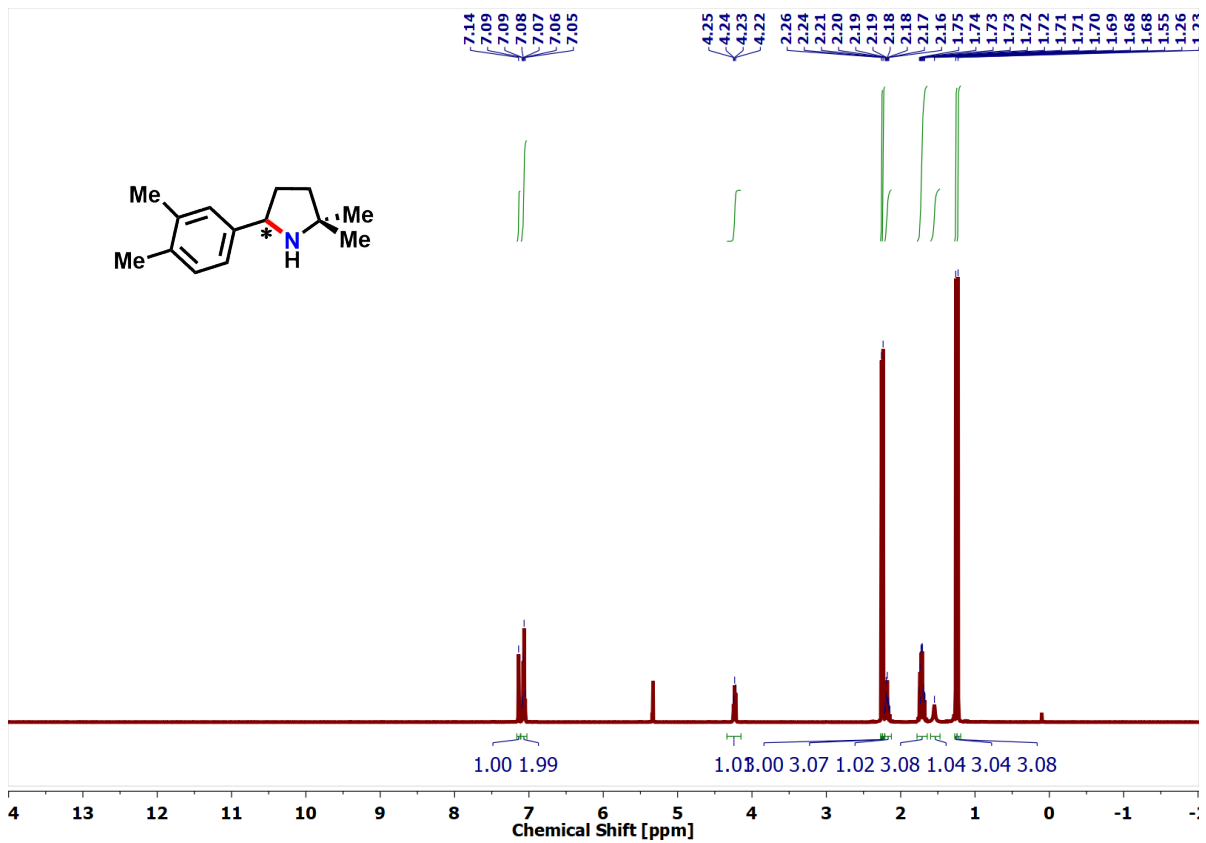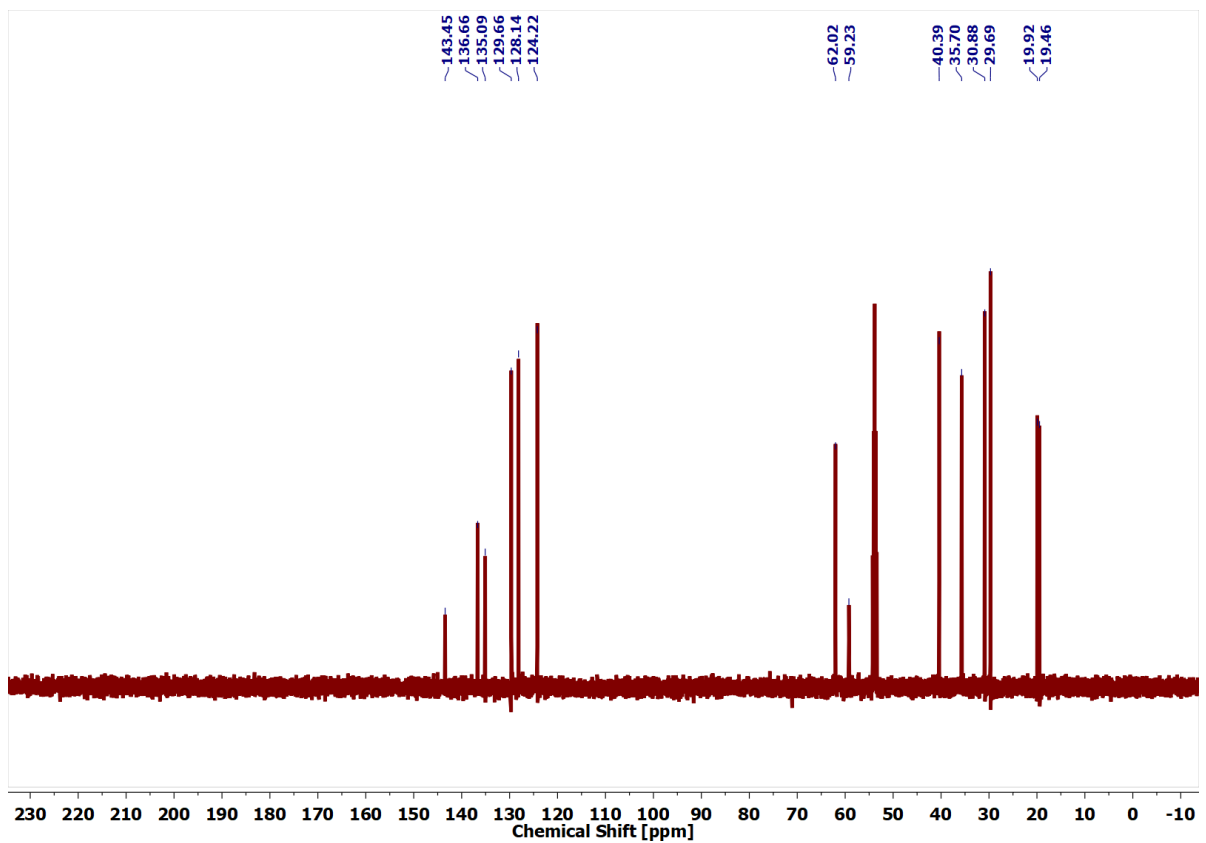

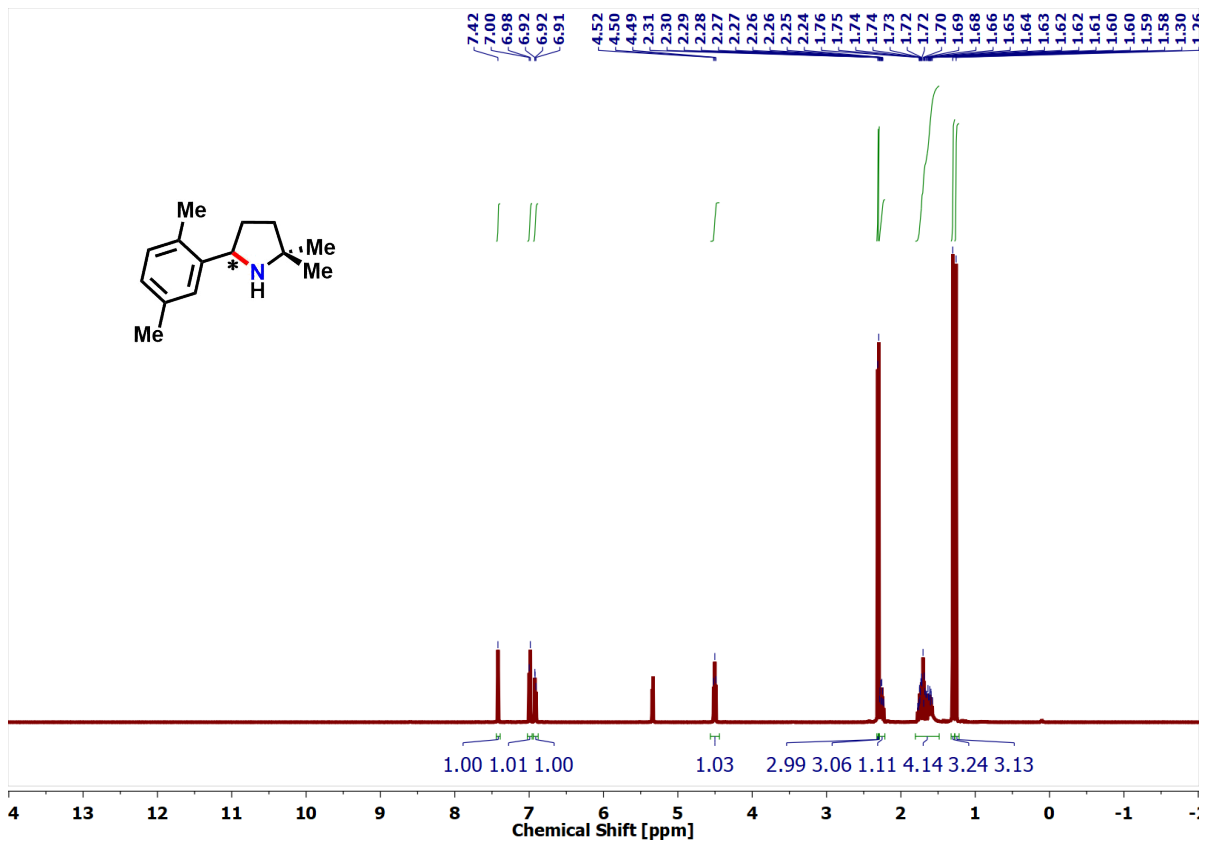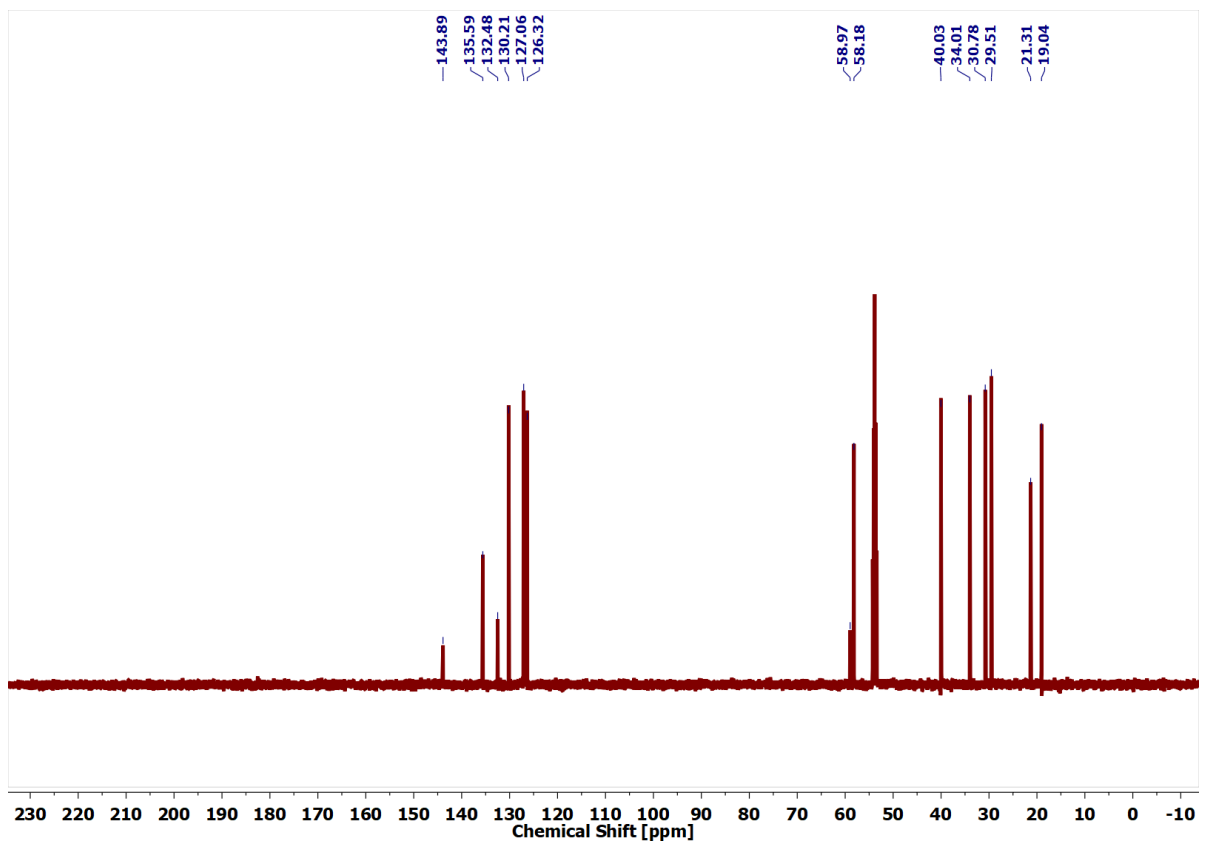



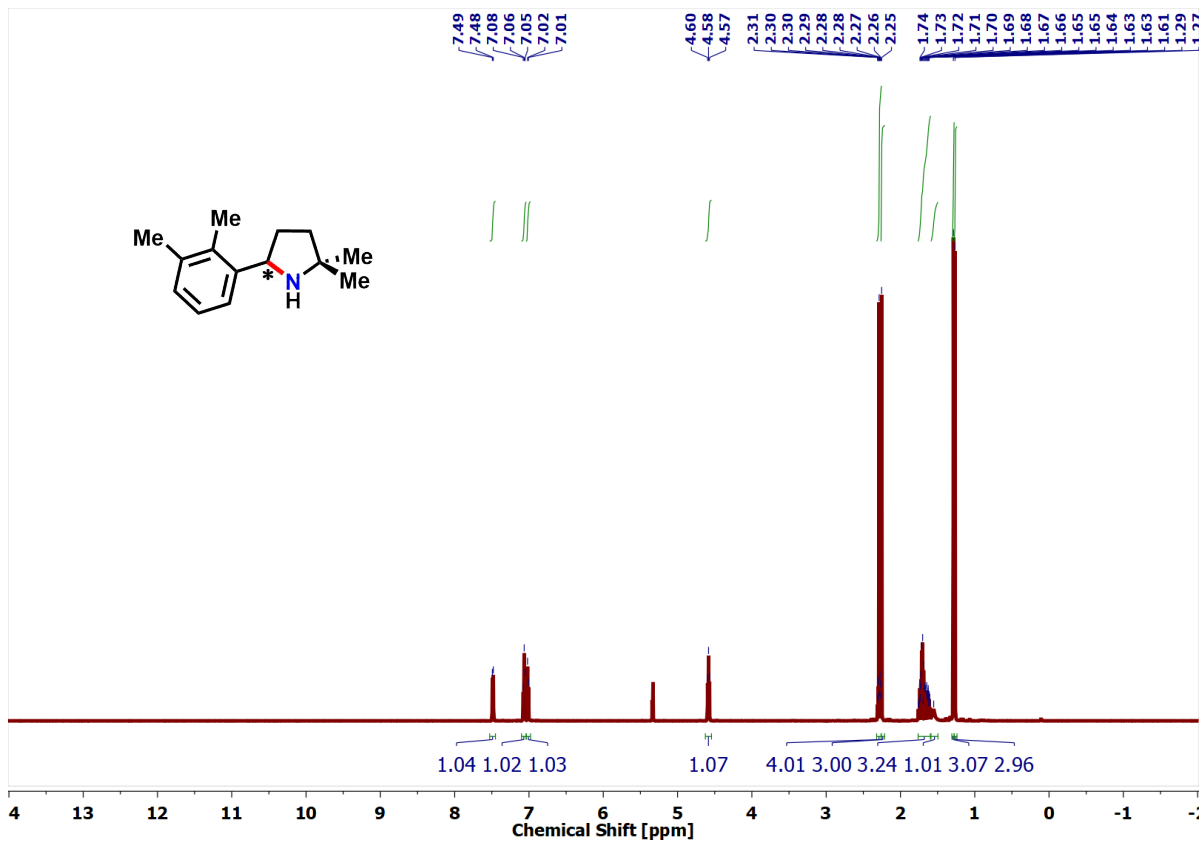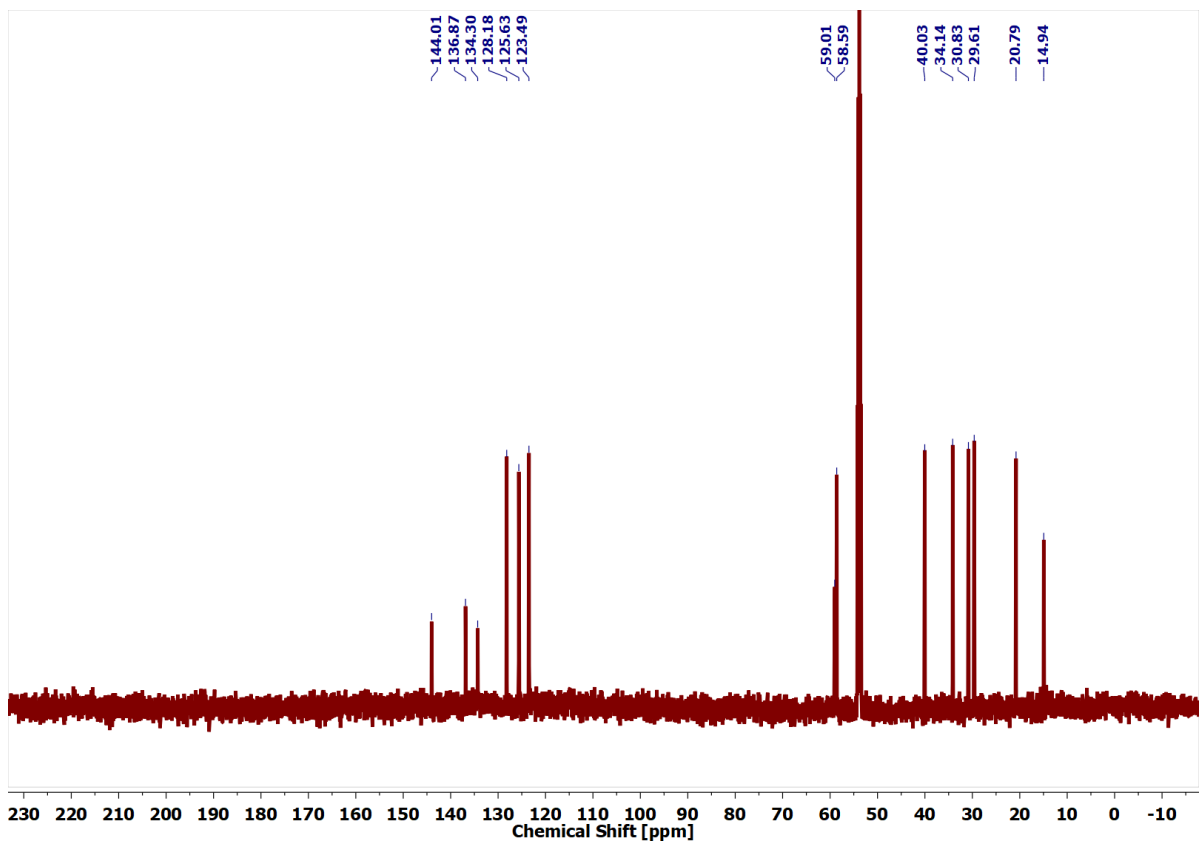

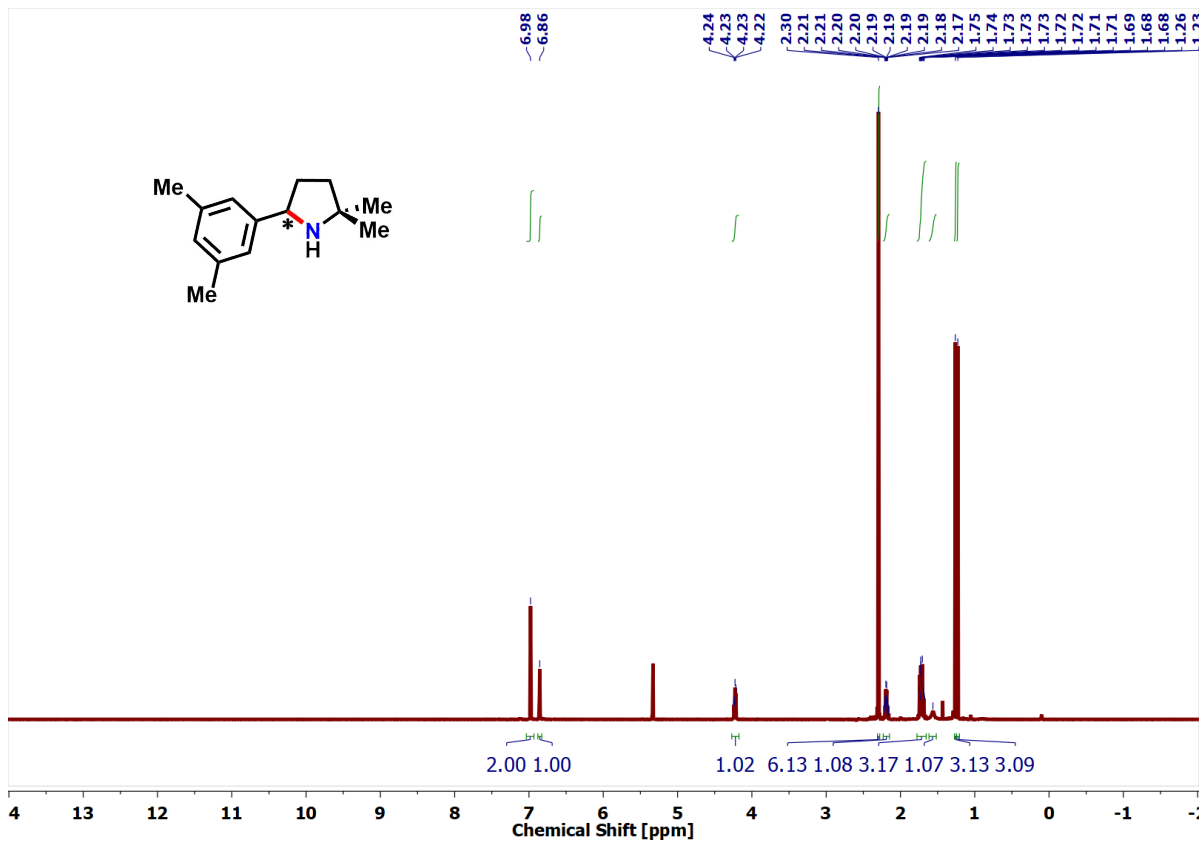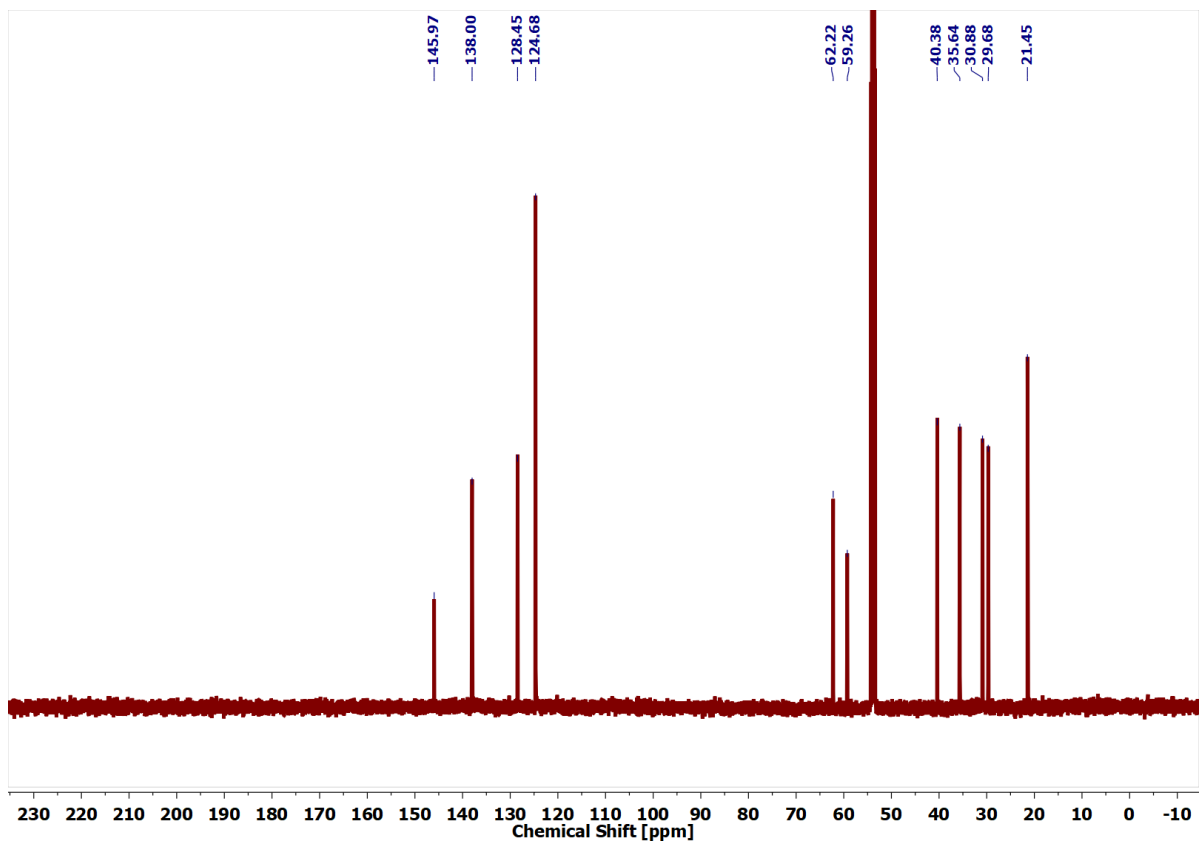

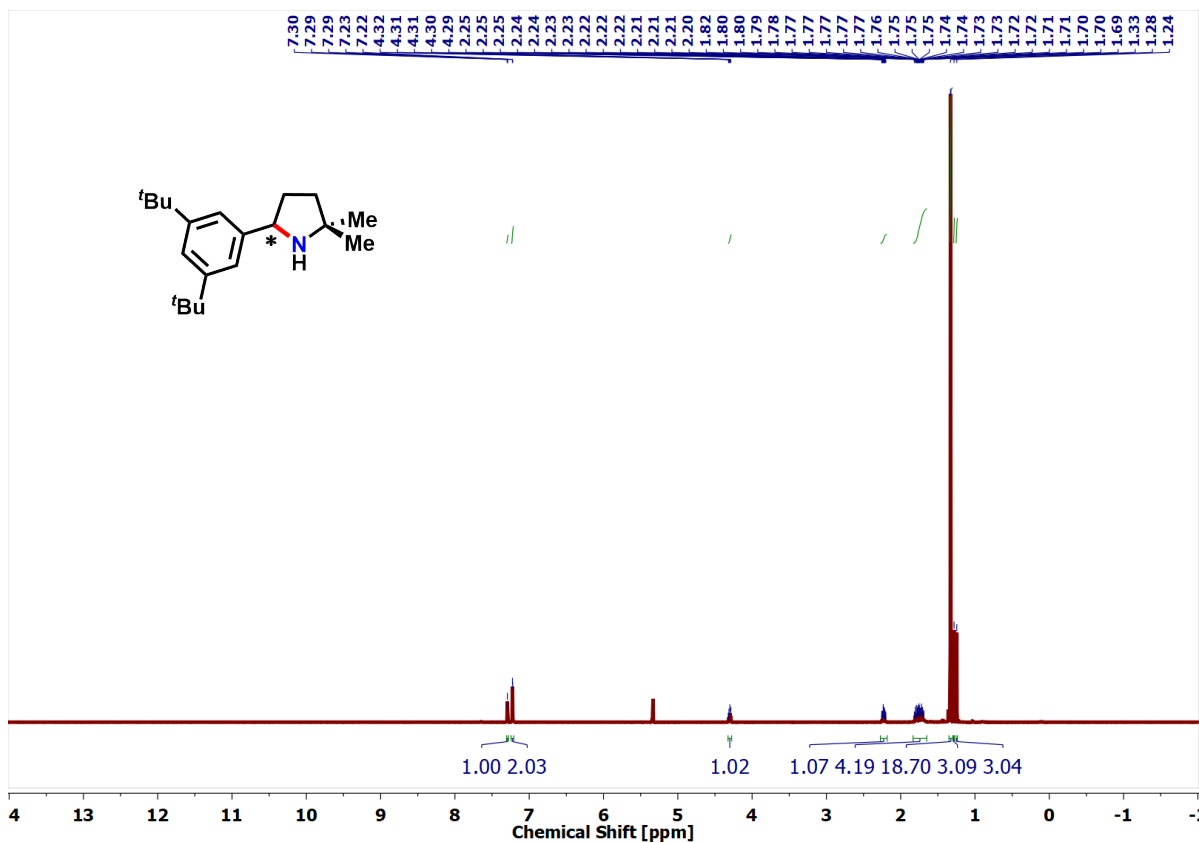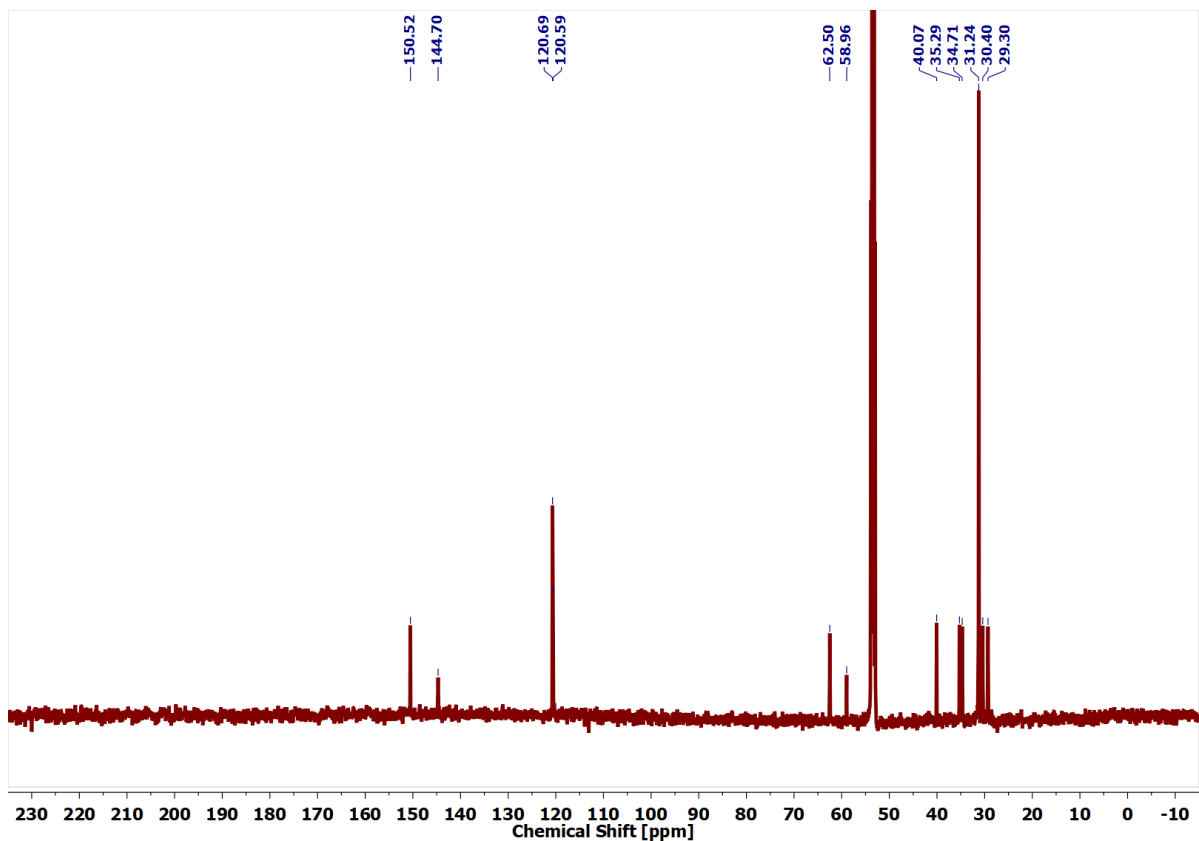

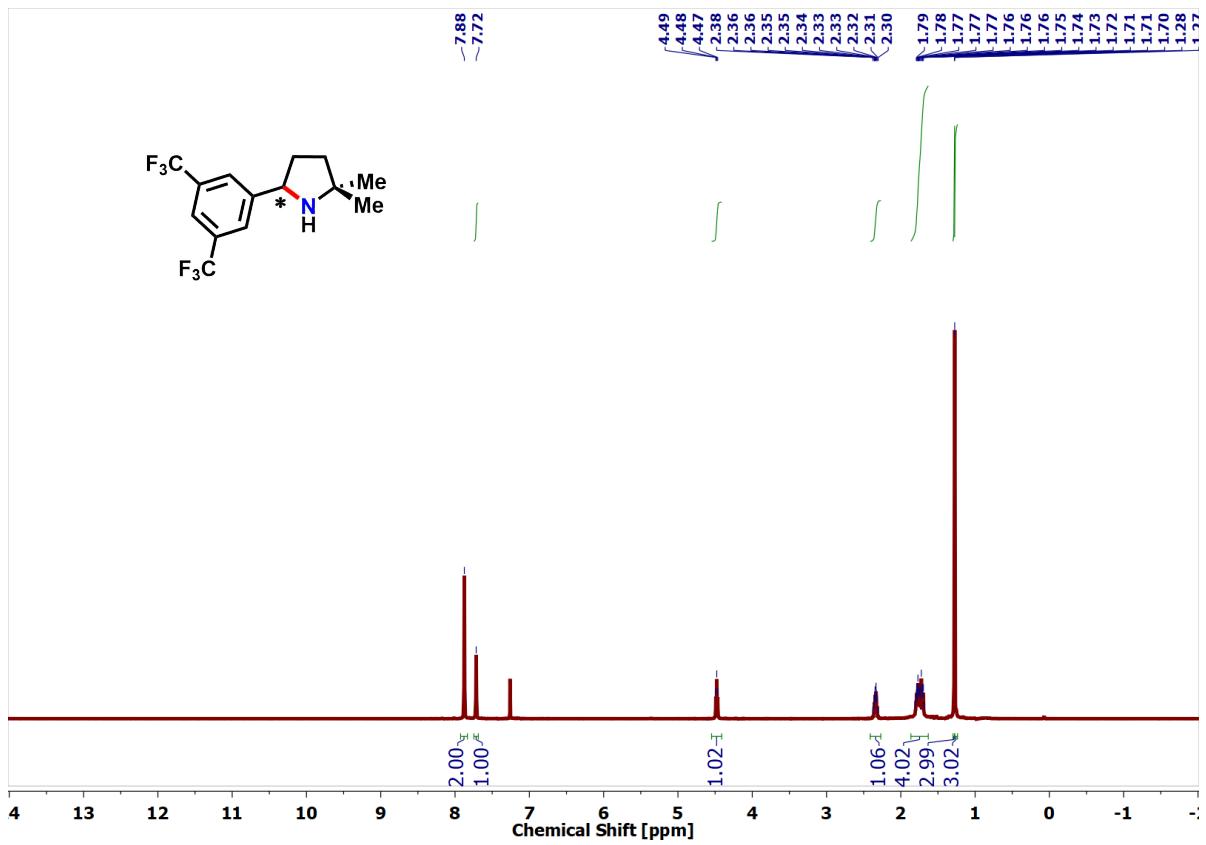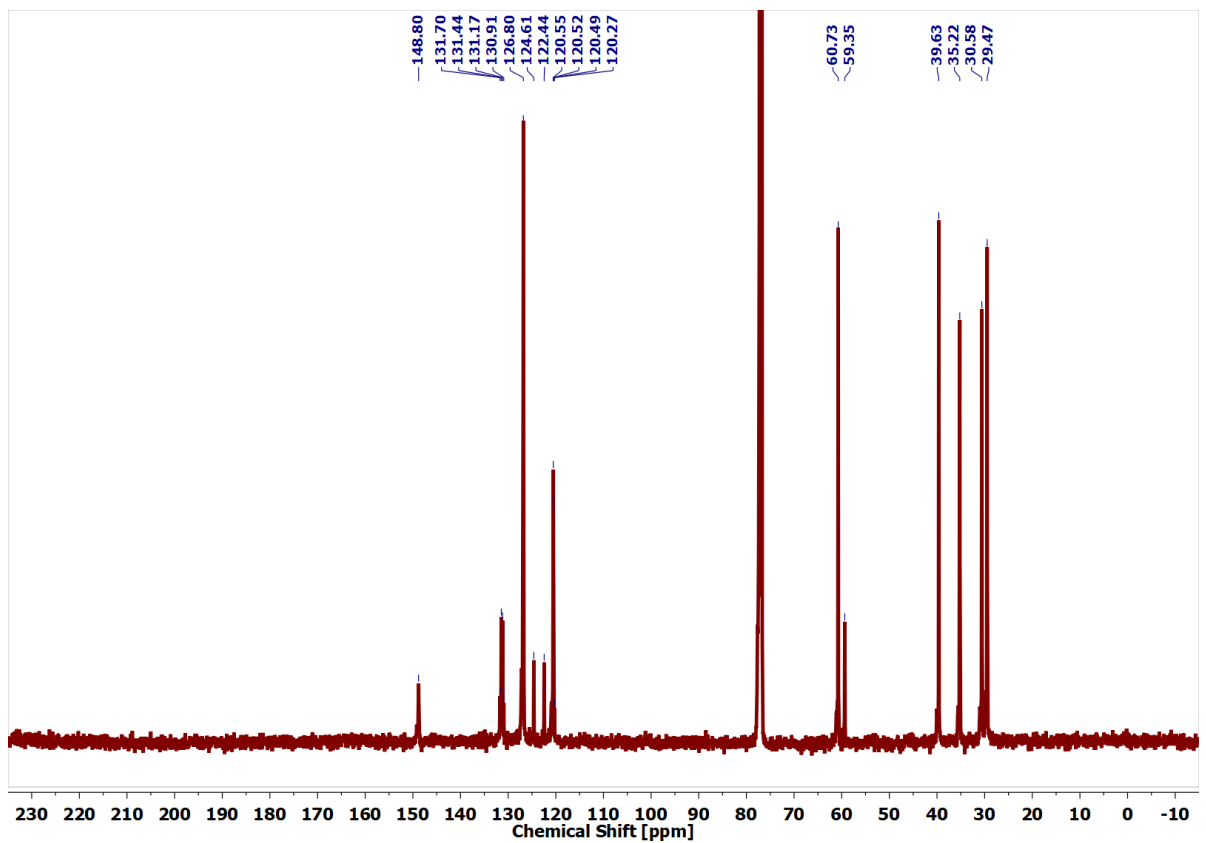

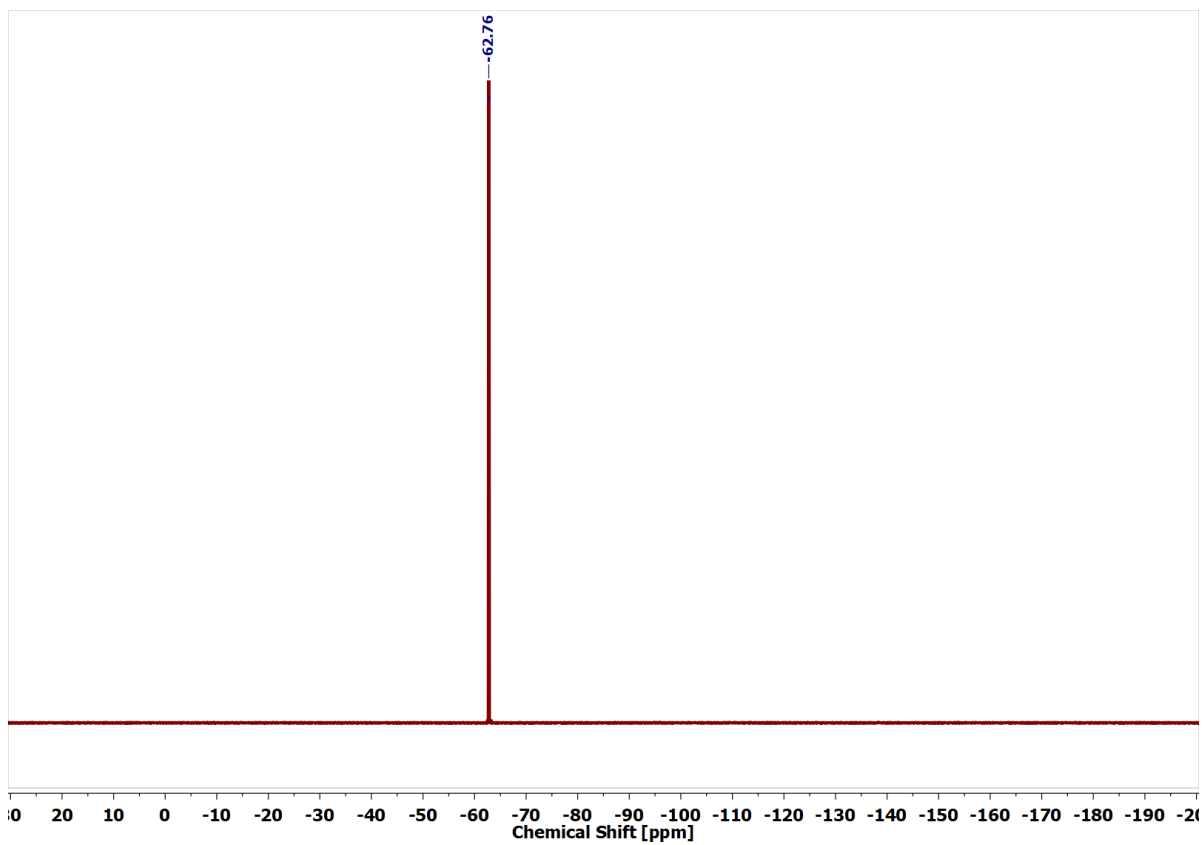

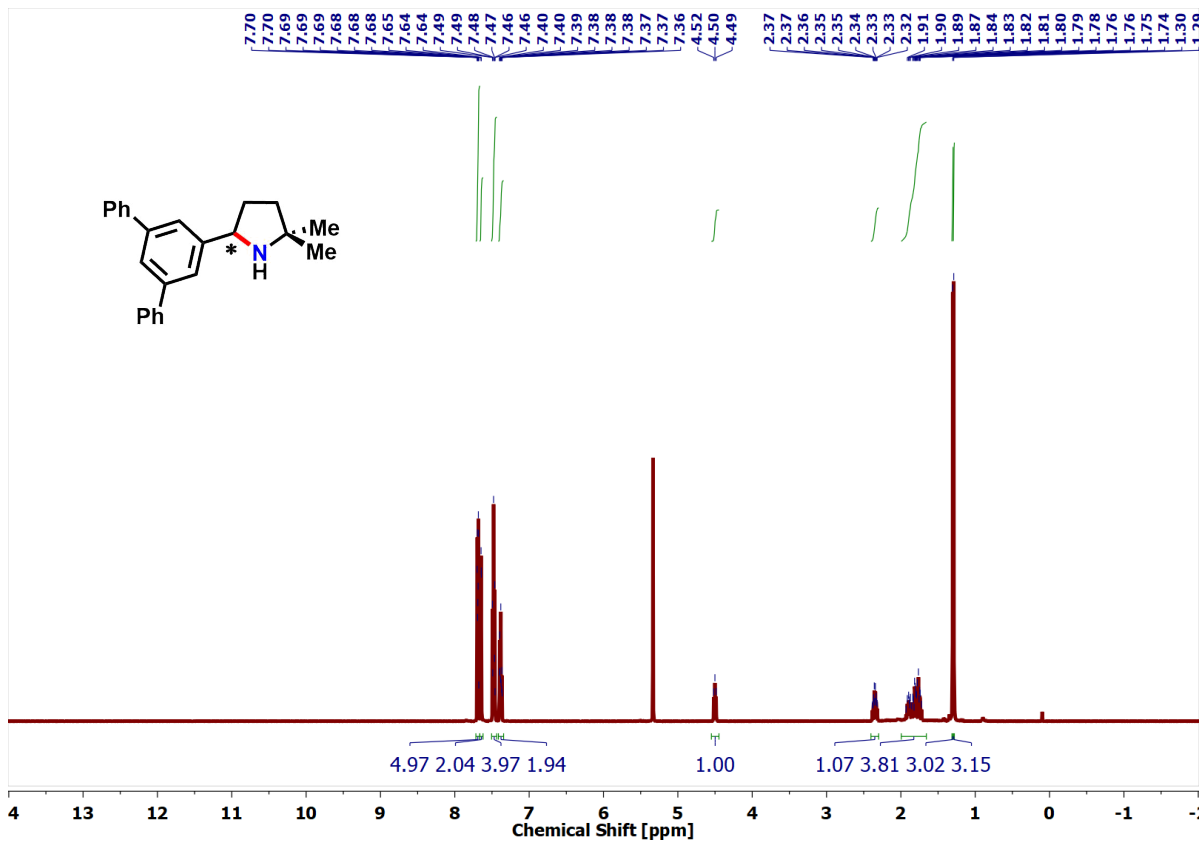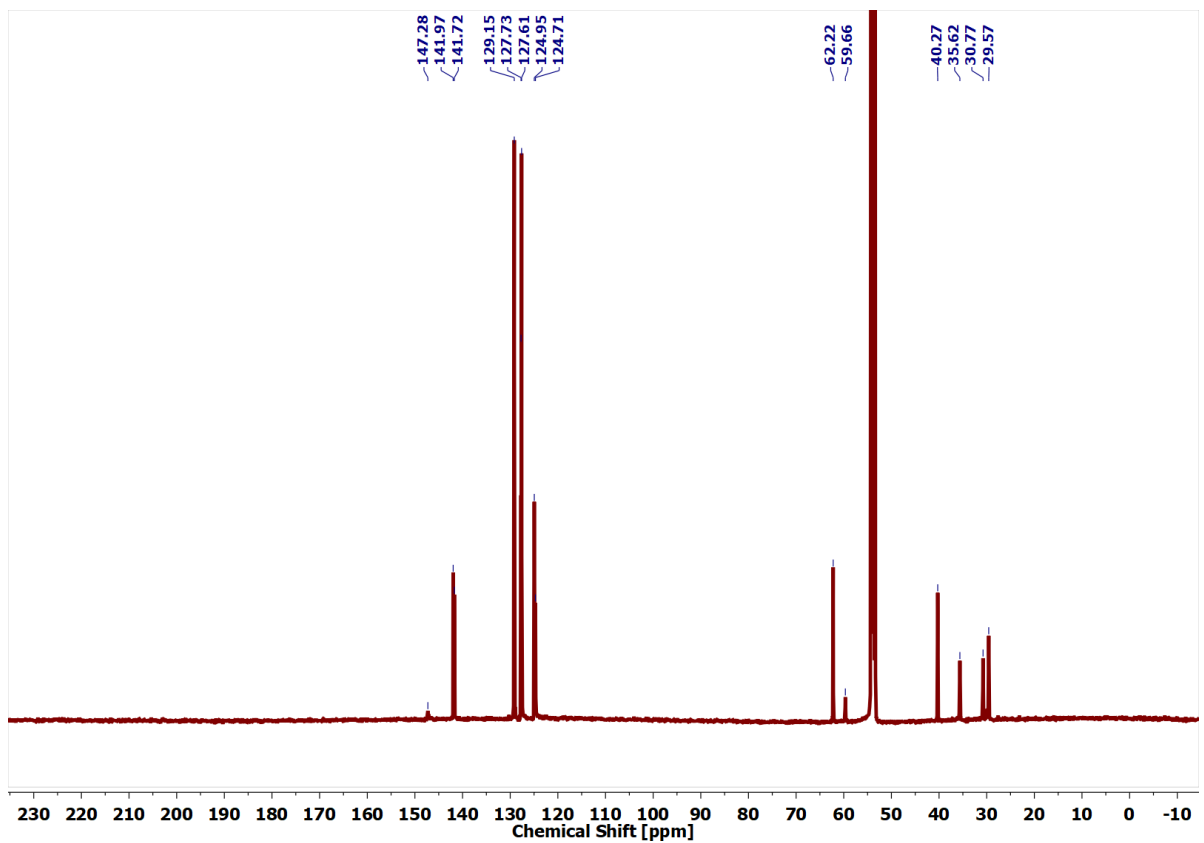

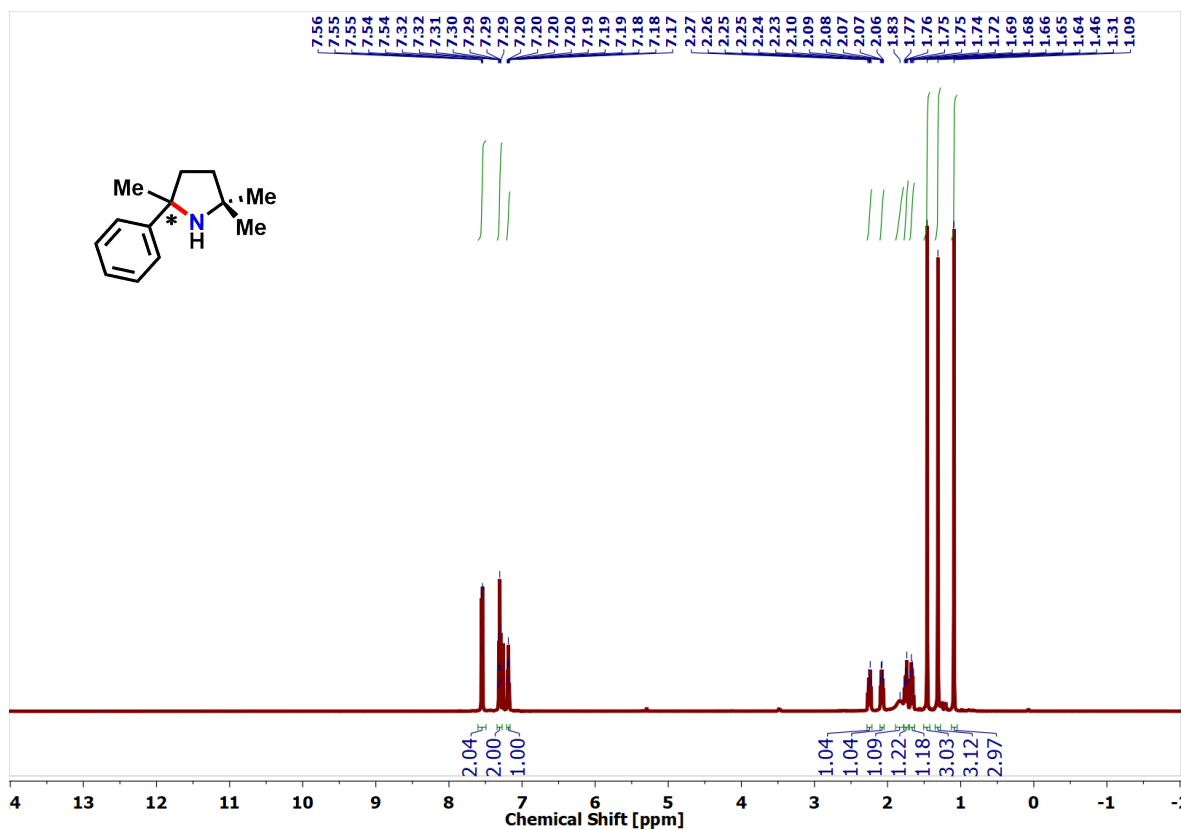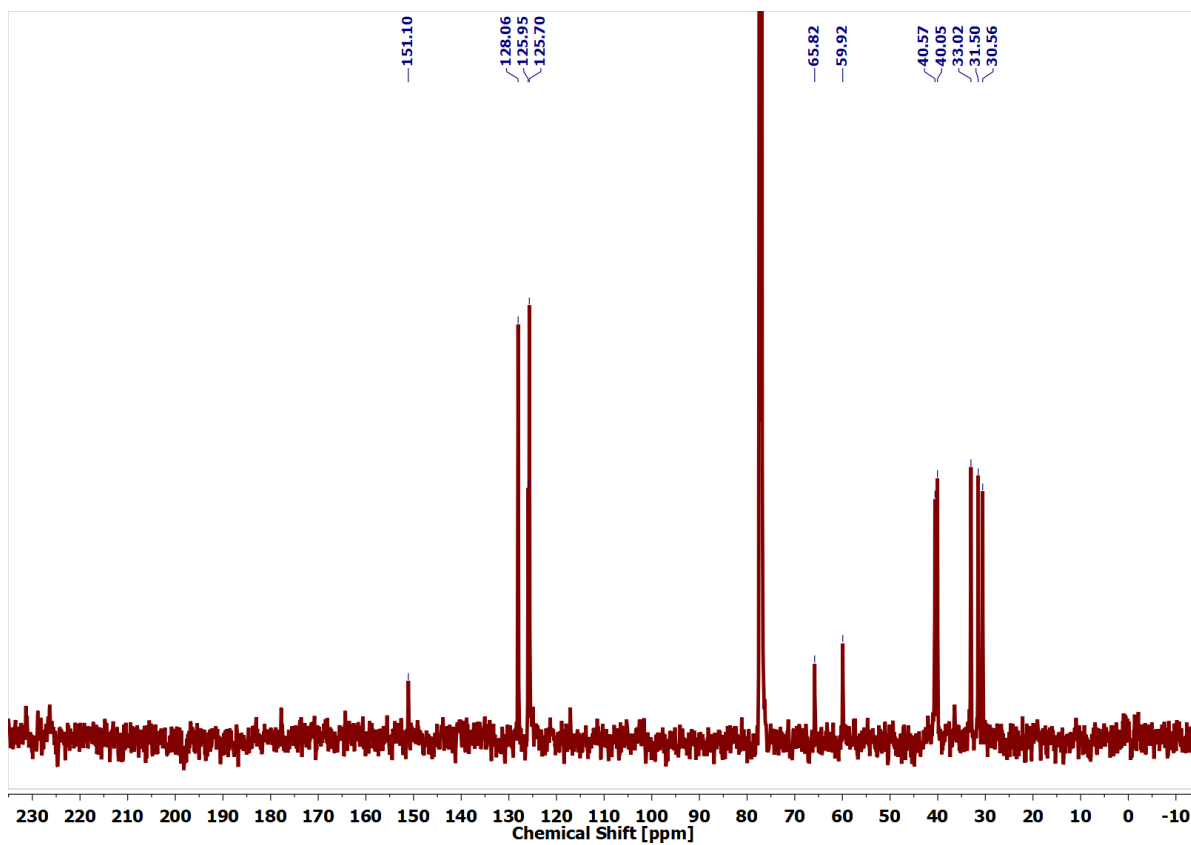

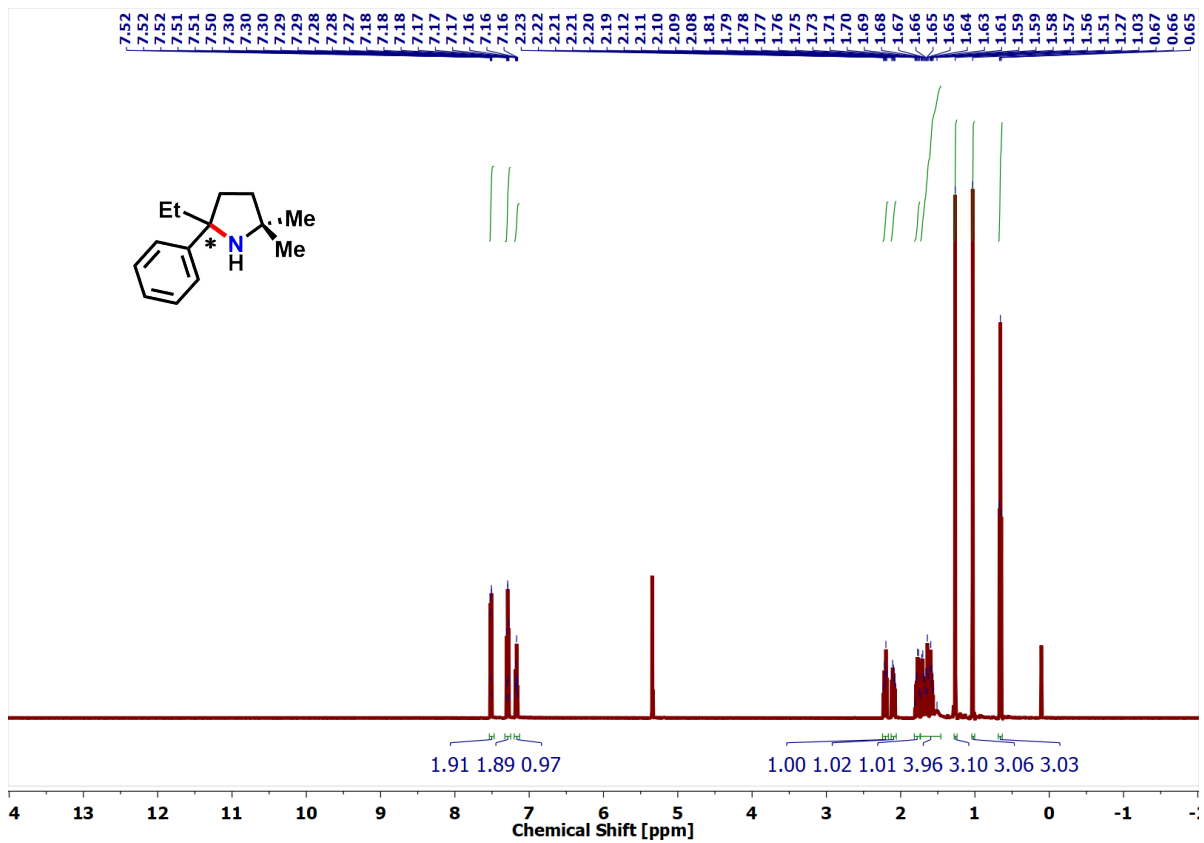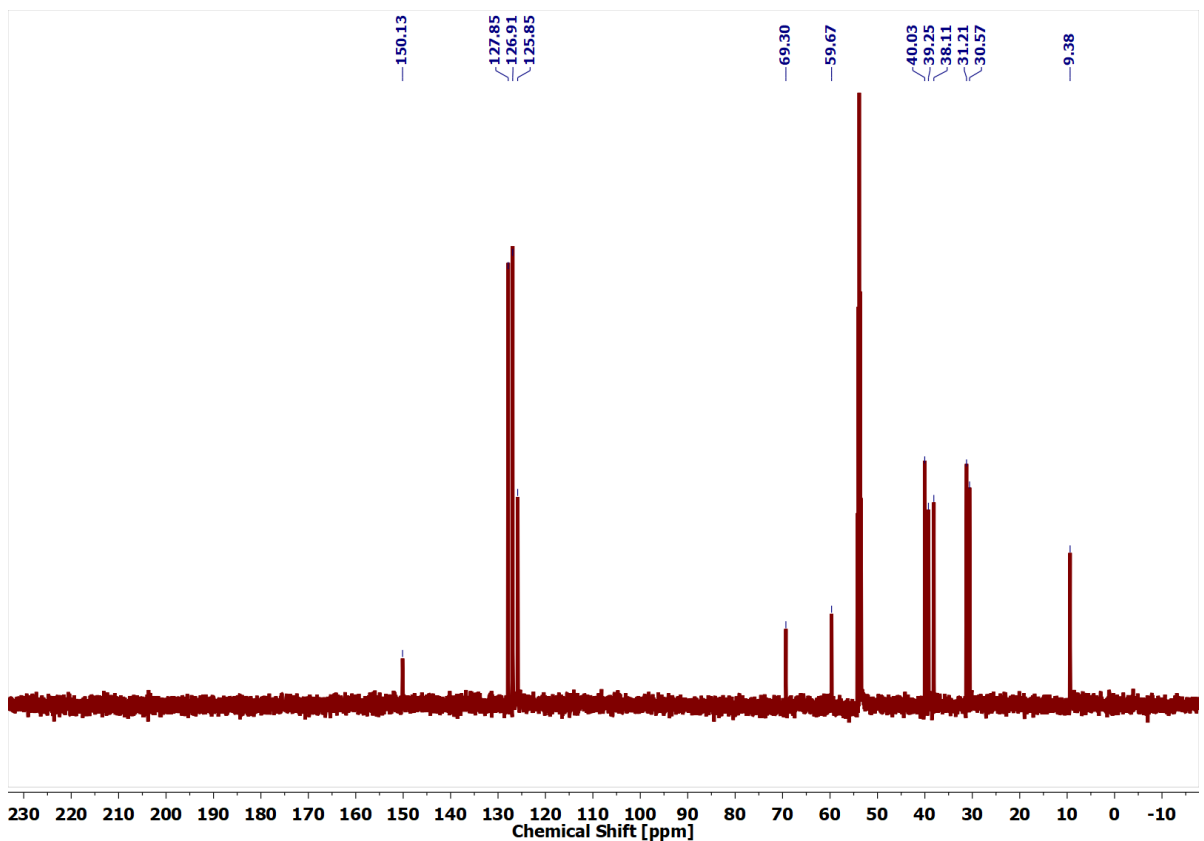



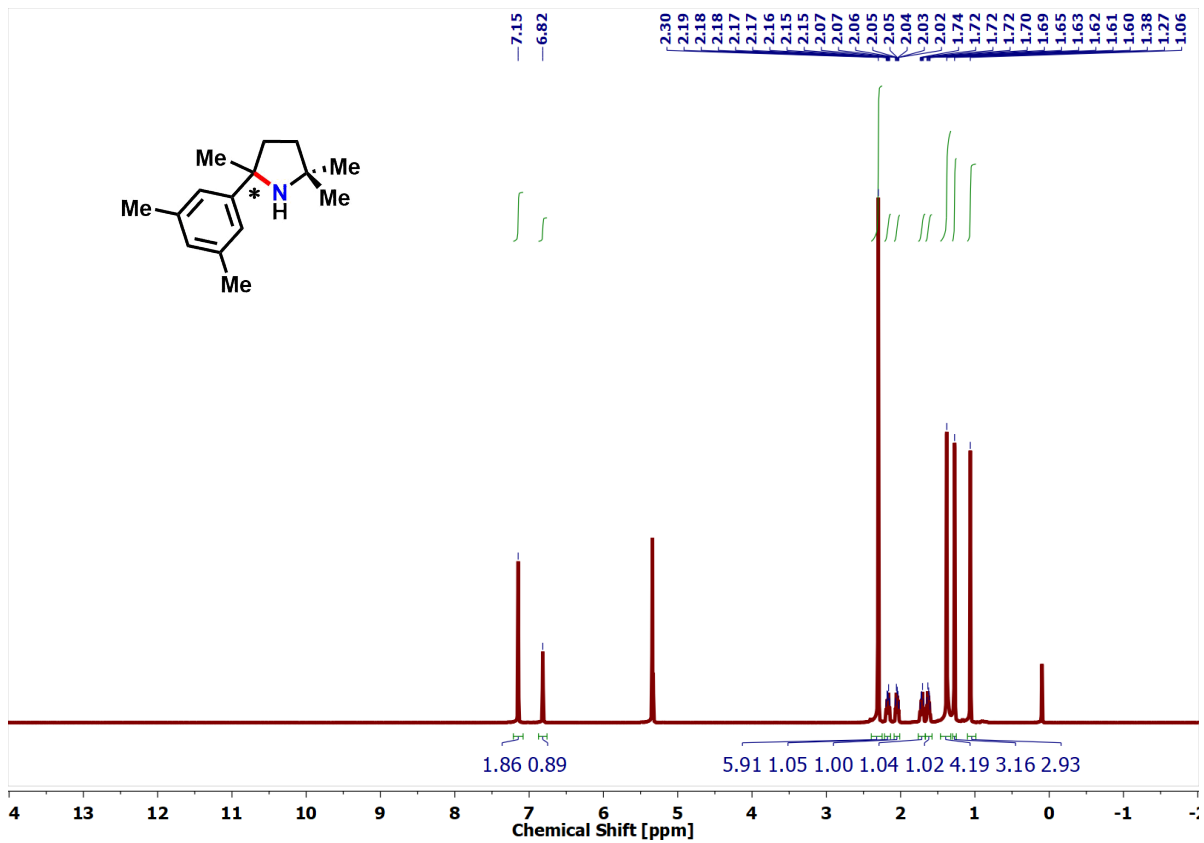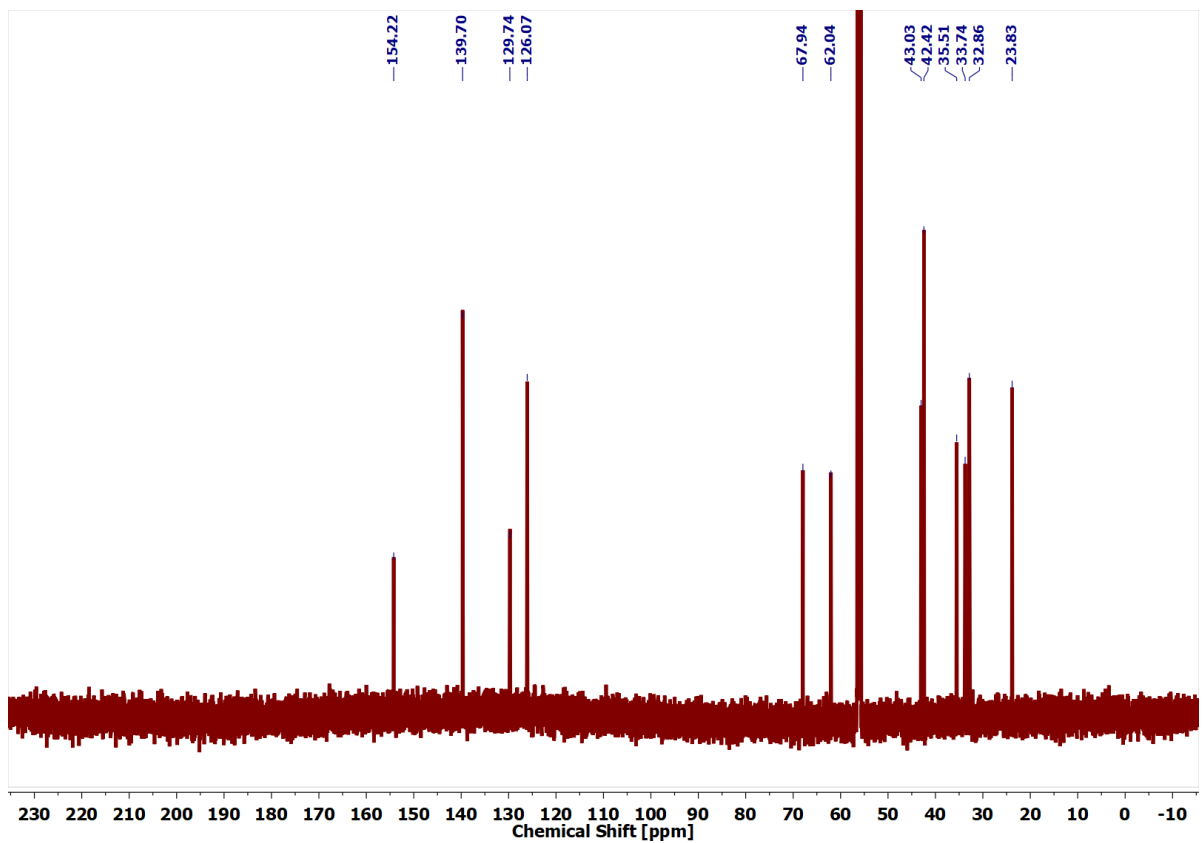

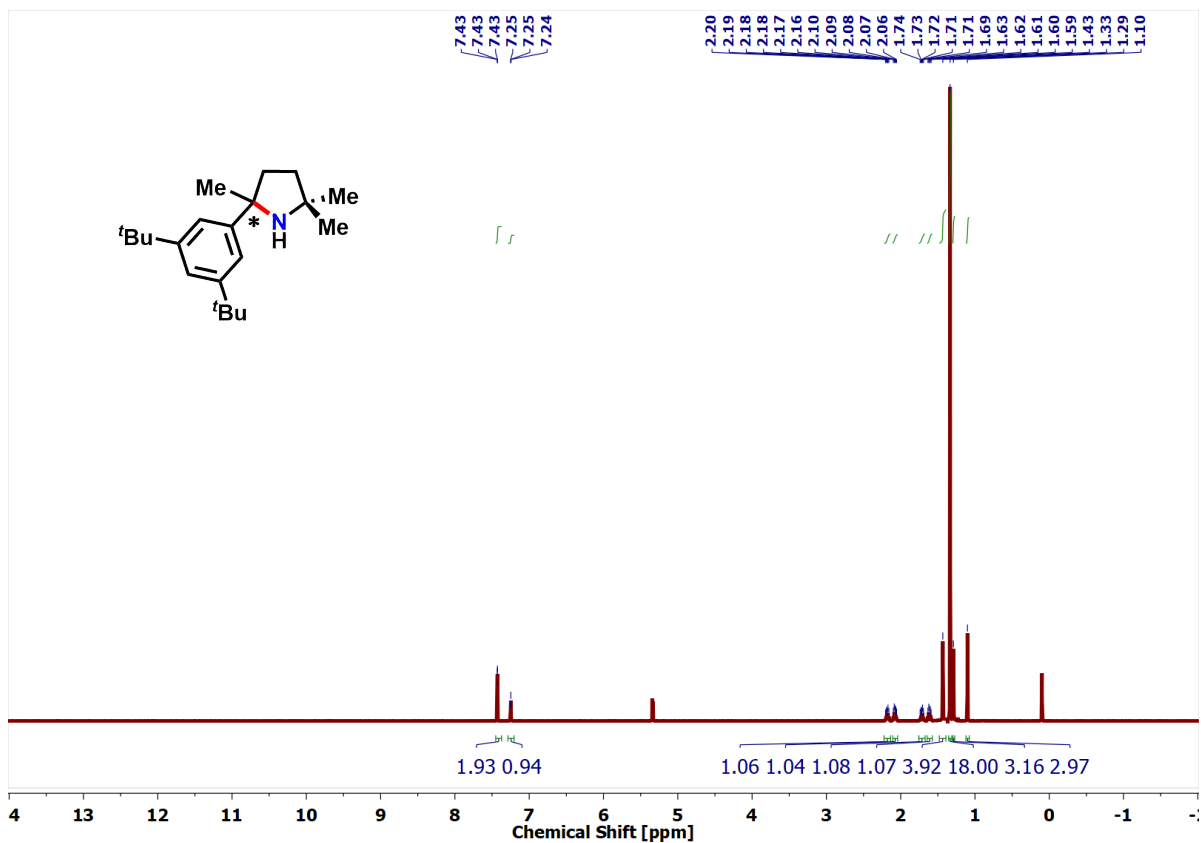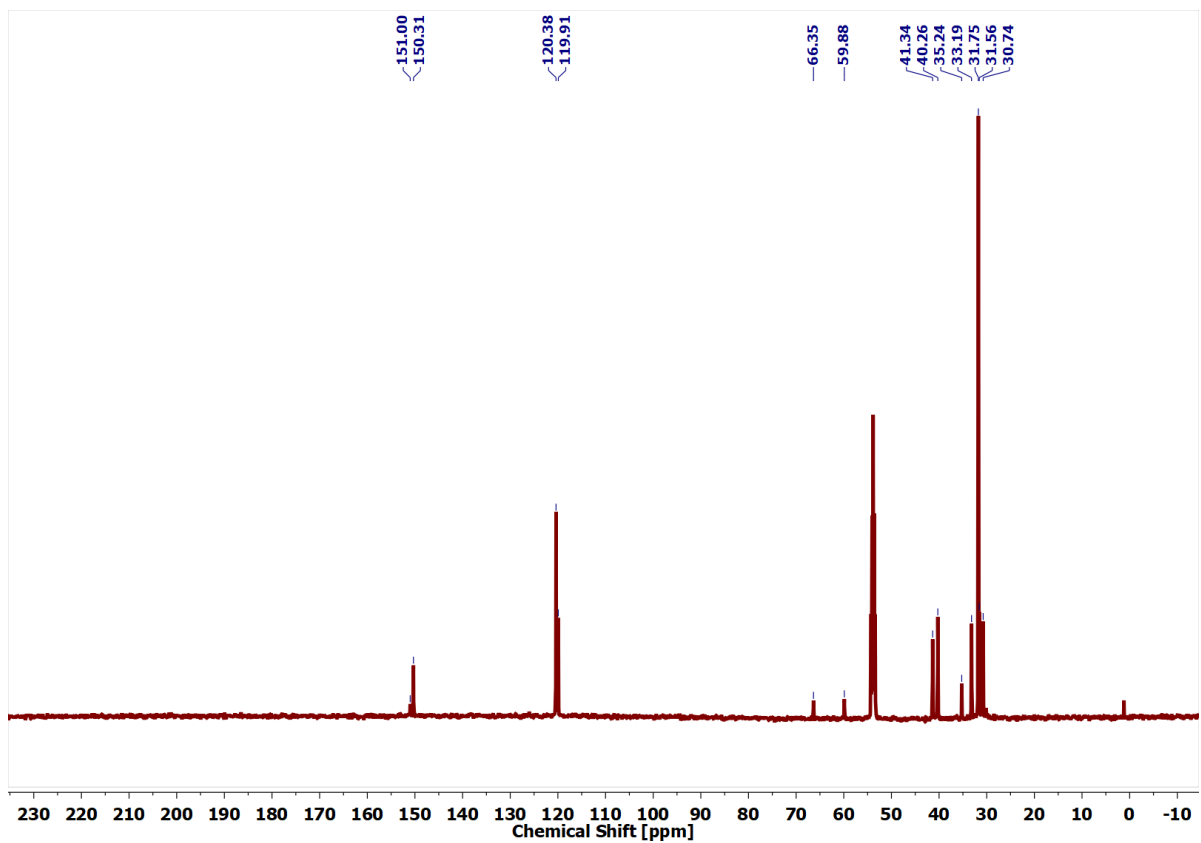

## NMR spectra for ee determination

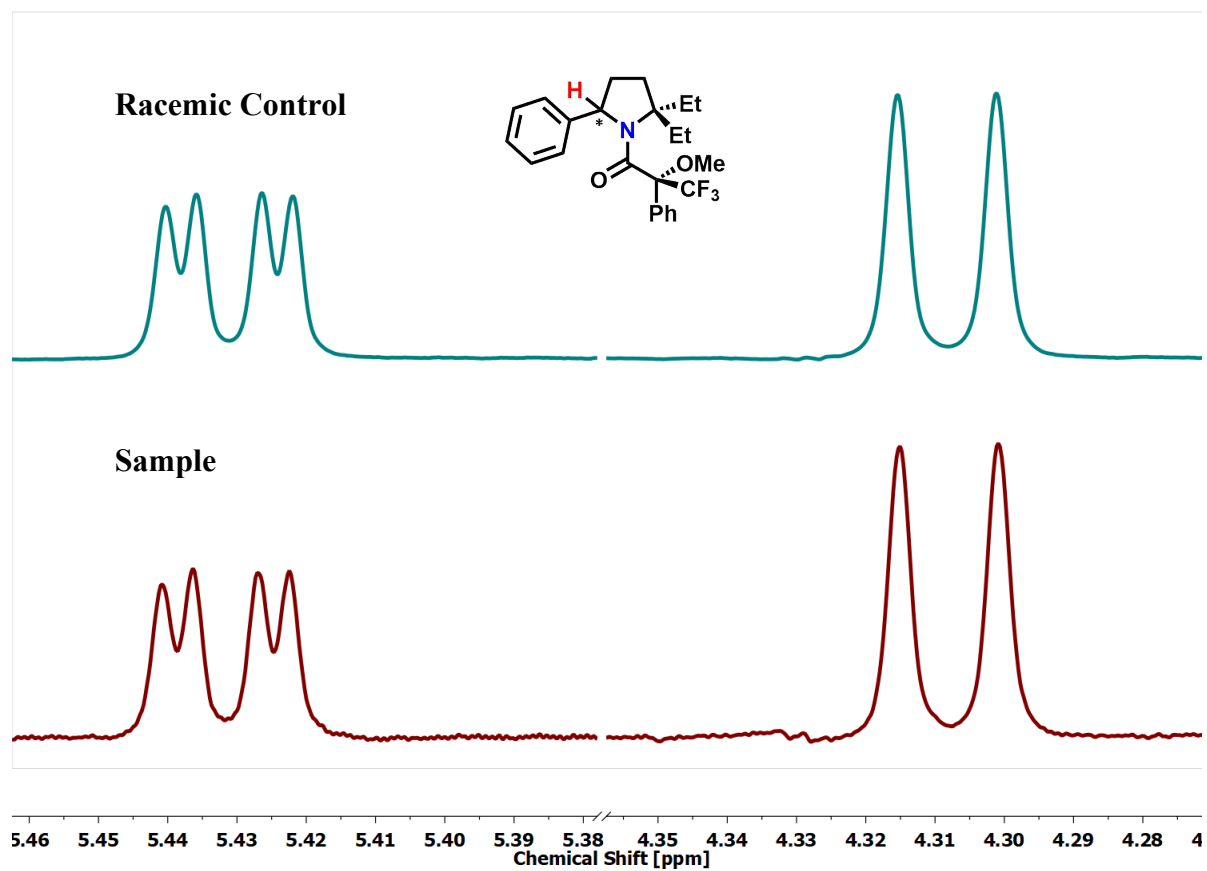

## Integration Table

|                        | 5.46–5.40 | 4.33–4.28 | ee% |
|------------------------|-----------|-----------|-----|
| <b>Racemic Control</b> | 176.73    | 176.97    | 0   |
| <b>Sample</b>          | 43.68     | 48.13     | 5%  |

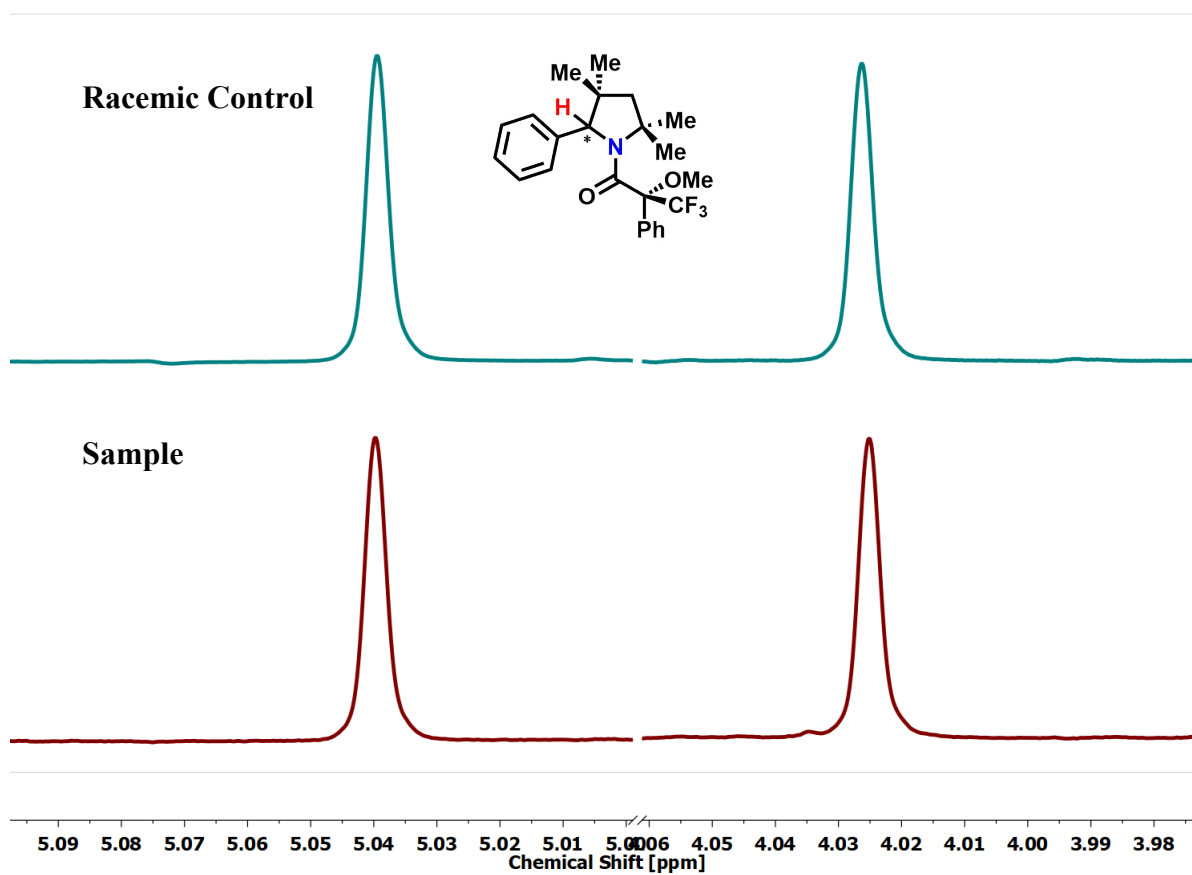

**Integration Table**

|                        | 5.07–5.01 | 4.06–4.00 | ee% |
|------------------------|-----------|-----------|-----|
| <b>Racemic Control</b> | 250.50    | 251.10    | 0   |
| <b>Sample</b>          | 103.92    | 118.35    | 6%  |

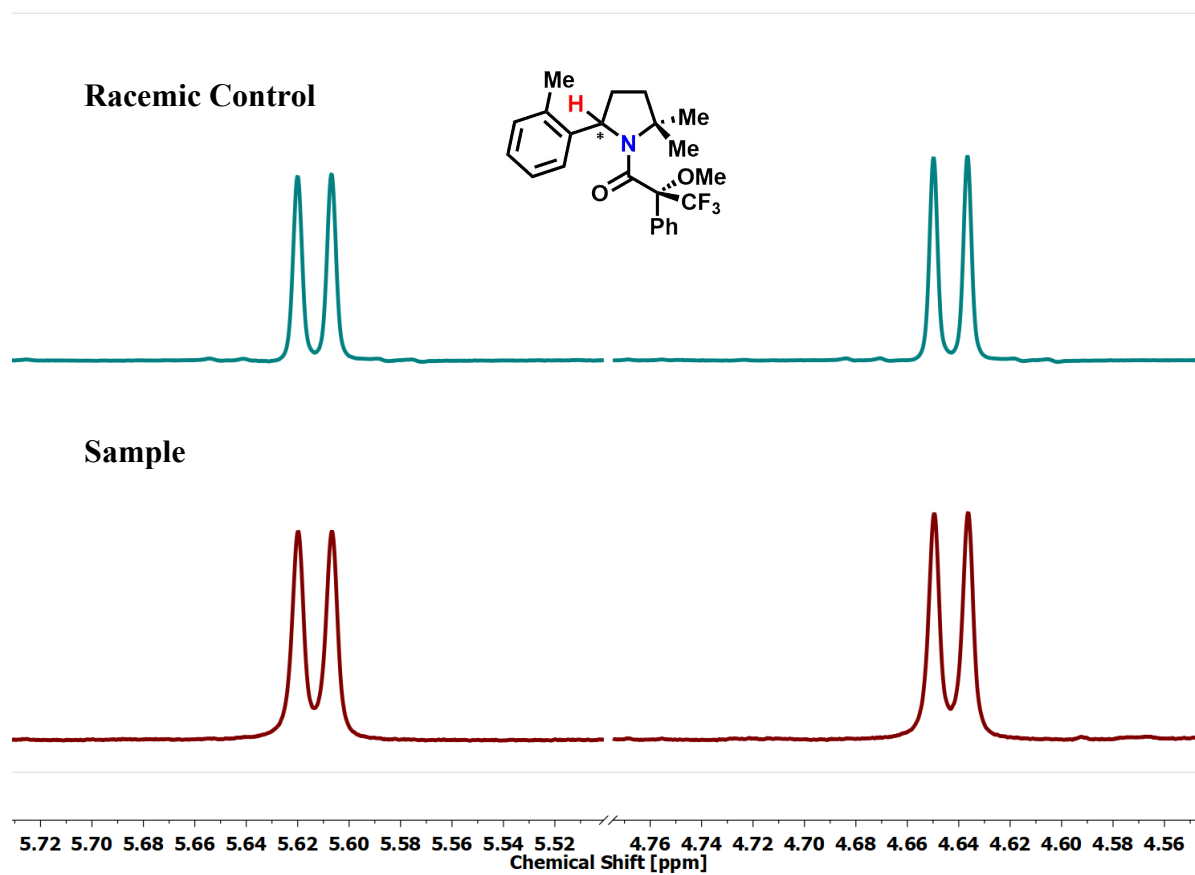

### Integration Table

|                        | 5.07–5.01 | 4.06–4.00 | ee% |
|------------------------|-----------|-----------|-----|
| <b>Racemic Control</b> | 274.61    | 276.01    | 0   |
| <b>Sample</b>          | 137.57    | 142.69    | 2%  |

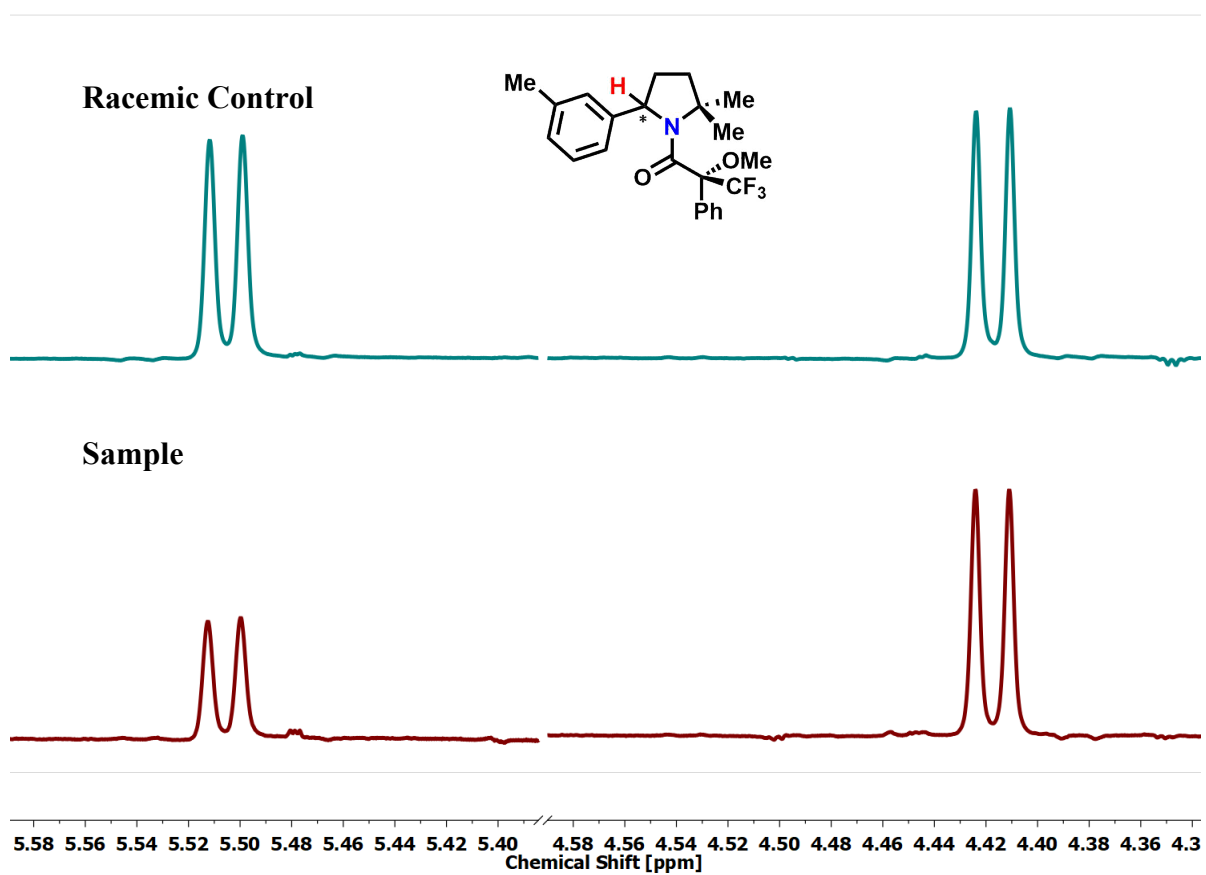

### Integration Table

|                        | 5.55–5.45 | 4.46–4.36 | ee% |
|------------------------|-----------|-----------|-----|
| <b>Racemic Control</b> | 354.72    | 358.16    | 0   |
| <b>Sample</b>          | 267.85    | 594.12    | 38% |

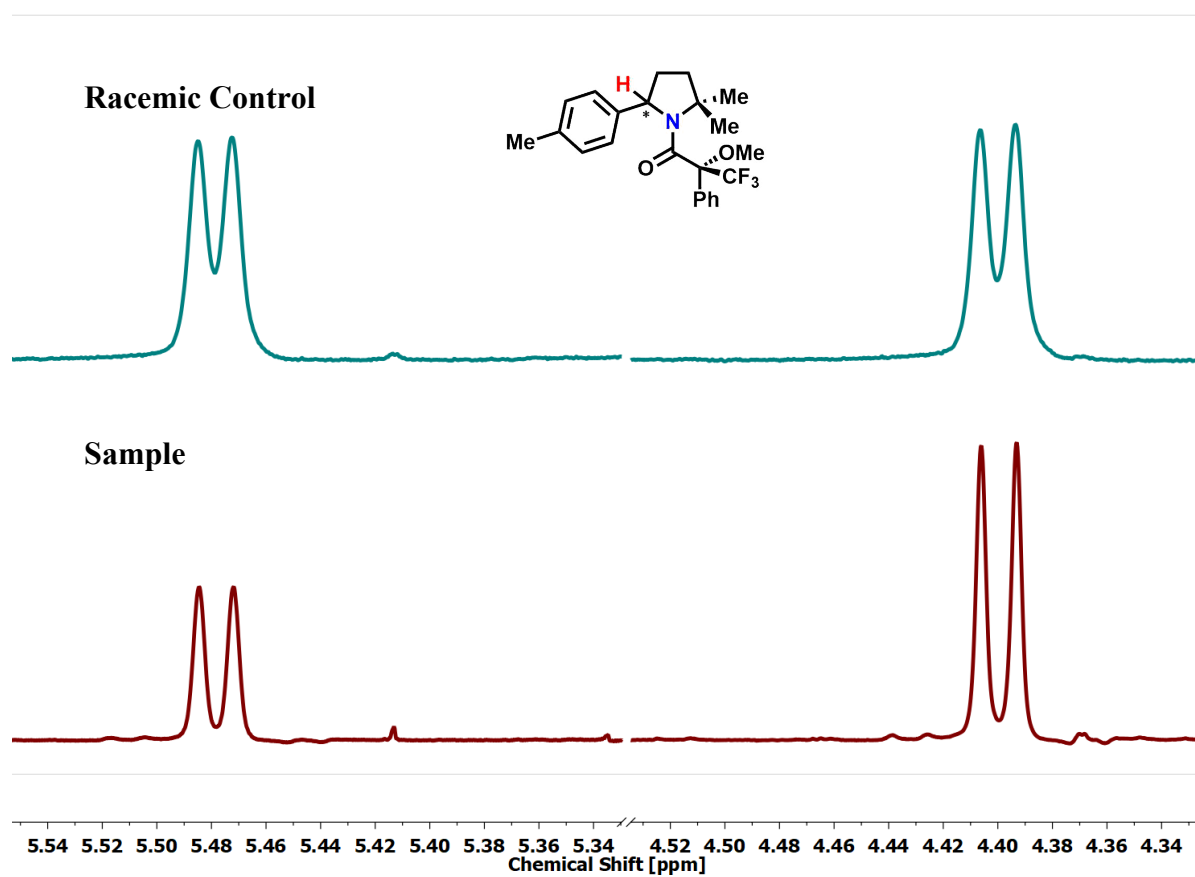

### Integration Table

|                        | 5.53–5.43 | 4.45–4.35 | ee% |
|------------------------|-----------|-----------|-----|
| <b>Racemic Control</b> | 236.60    | 238.40    | 0   |
| <b>Sample</b>          | 129.75    | 225.34    | 27% |

### Racemic Control

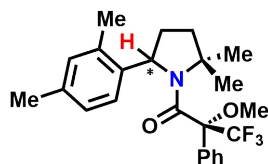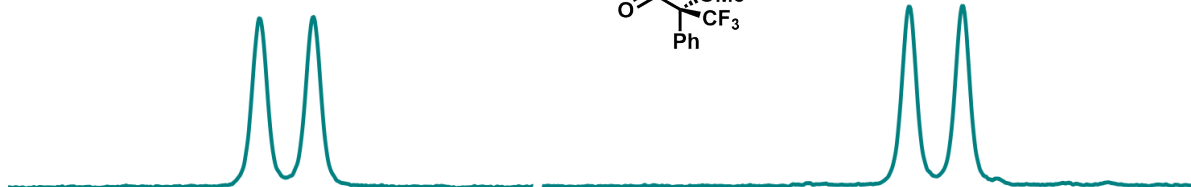

### Sample

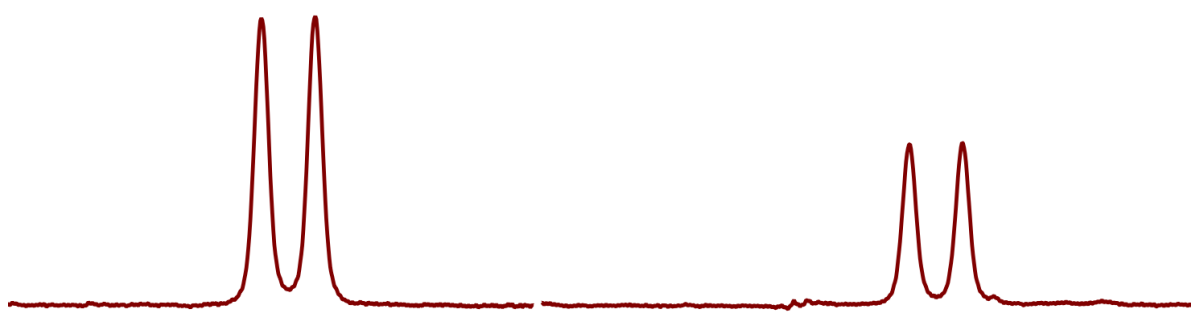

5.62 5.60 5.58 5.56 5.54 5.52 5.50 5.48 4.69 4.67 4.65 4.63 4.61 4.59 4.57 4.5  
Chemical Shift [ppm]

### Integration Table

|                        | 5.61–5.51 | 4.66–4.56 | ee% |
|------------------------|-----------|-----------|-----|
| <b>Racemic Control</b> | 56.85     | 57.60     | 1%  |
| <b>Sample</b>          | 80.47     | 43.52     | 30% |



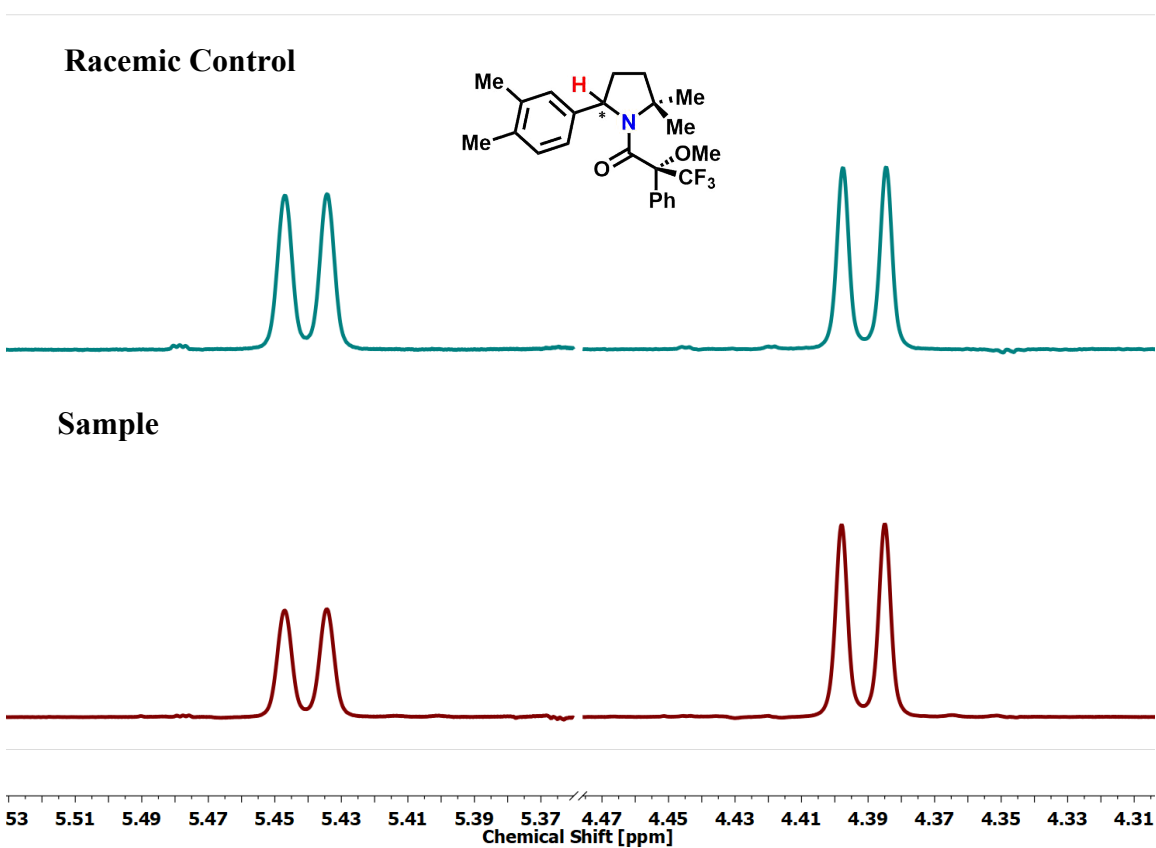

**Integration Table**

|                        | 5.50–5.40 | 4.44–4.34 | ee% |
|------------------------|-----------|-----------|-----|
| <b>Racemic Control</b> | 106.83    | 107.18    | 0   |
| <b>Sample</b>          | 253.95    | 390.81    | 21% |

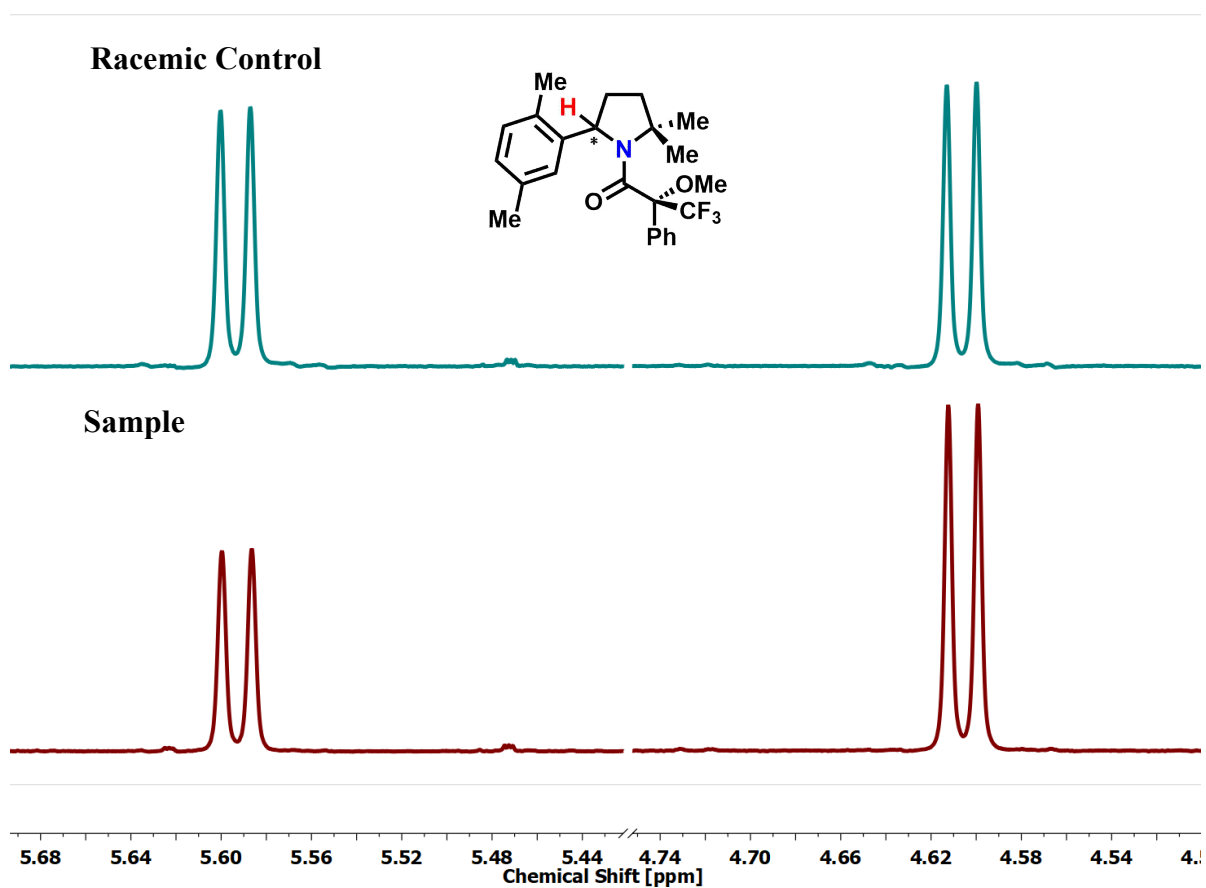

**Integration Table**

|                        | 5.65–5.55 | 4.65–4.55 | ee% |
|------------------------|-----------|-----------|-----|
| <b>Racemic Control</b> | 166.70    | 167.93    | 0   |
| <b>Sample</b>          | 131.29    | 209.53    | 23% |

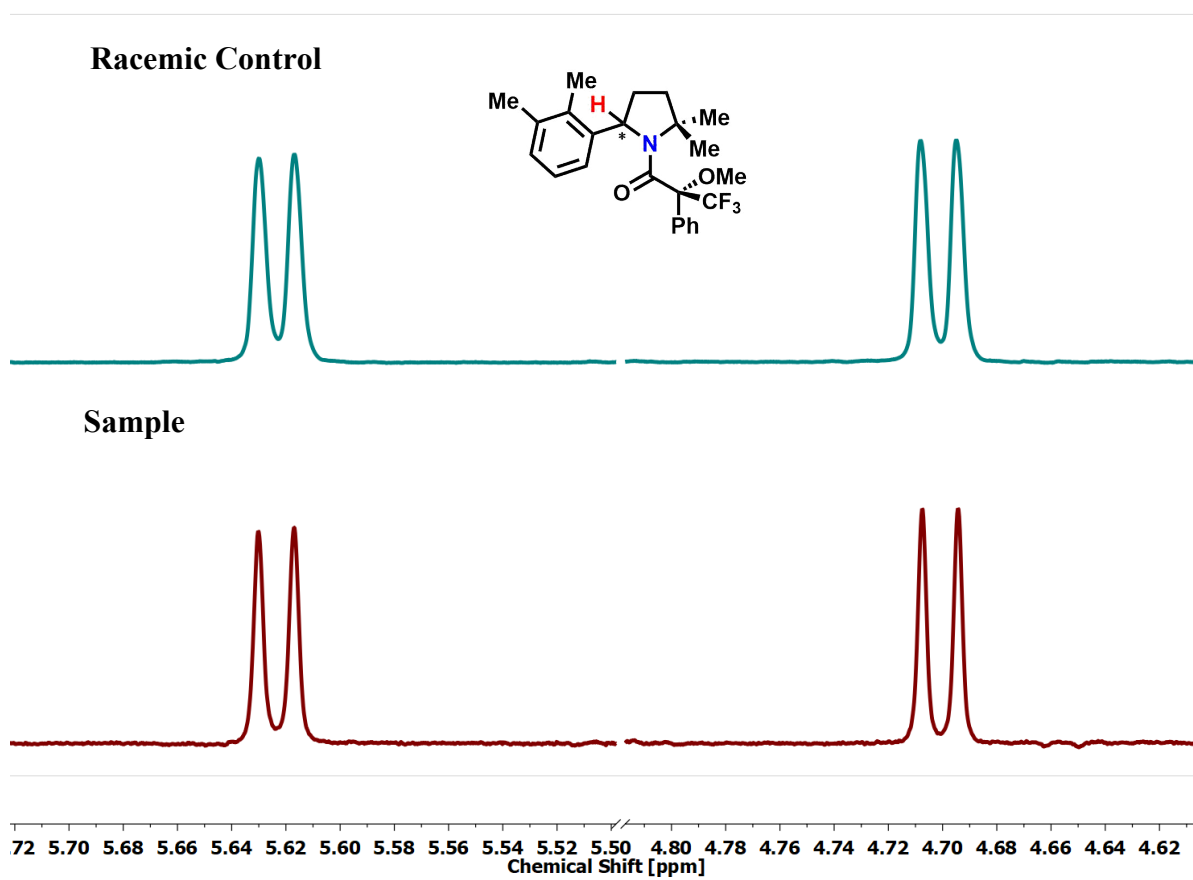

**Integration Table**

|                        | 5.67–5.57 | 4.75–4.65 | ee% |
|------------------------|-----------|-----------|-----|
| <b>Racemic Control</b> | 235.96    | 235.46    | 0   |
| <b>Sample</b>          | 48.41     | 49.09     | 1%  |

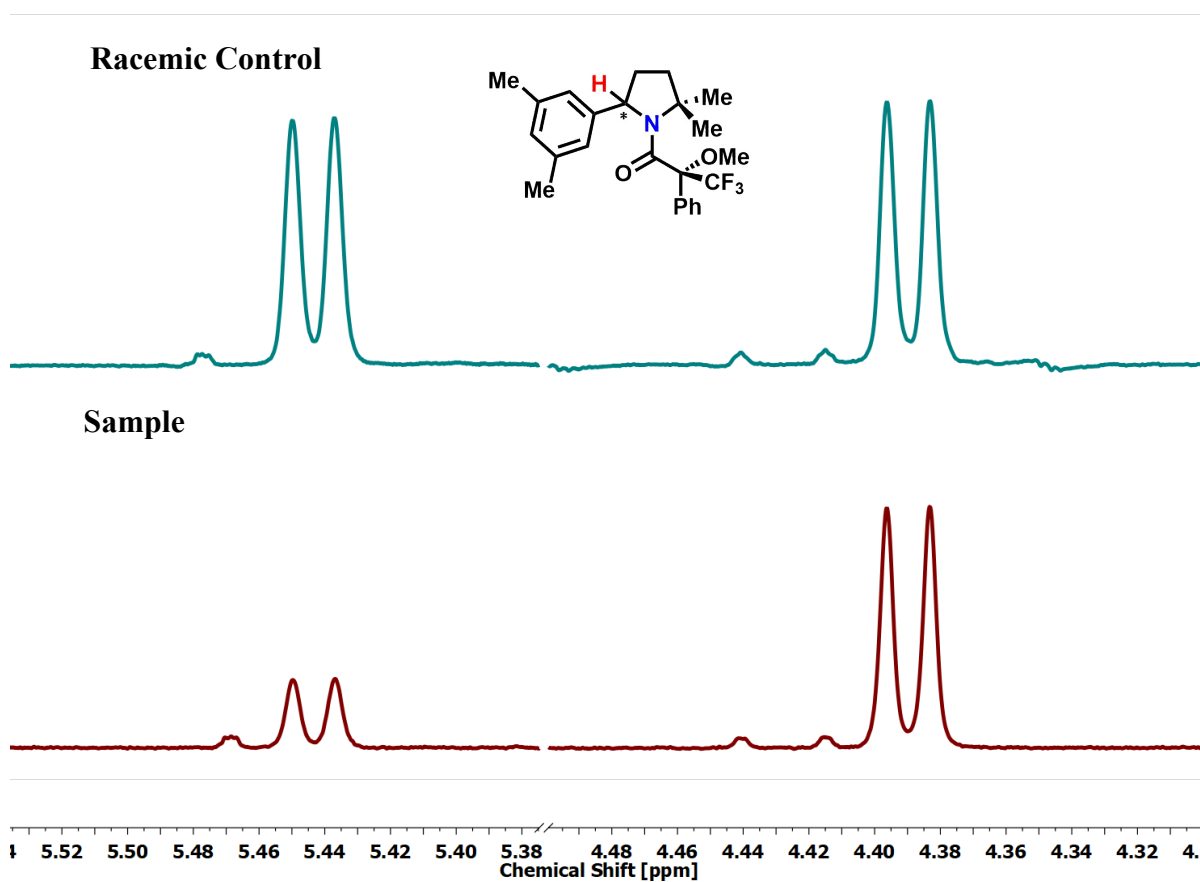

**Integration Table**

|                        | 5.49–5.39 | 4.44–4.34 | ee% |
|------------------------|-----------|-----------|-----|
| <b>Racemic Control</b> | 118.51    | 120.79    | 1%  |
| <b>Sample</b>          | 30.81     | 100.54    | 53% |

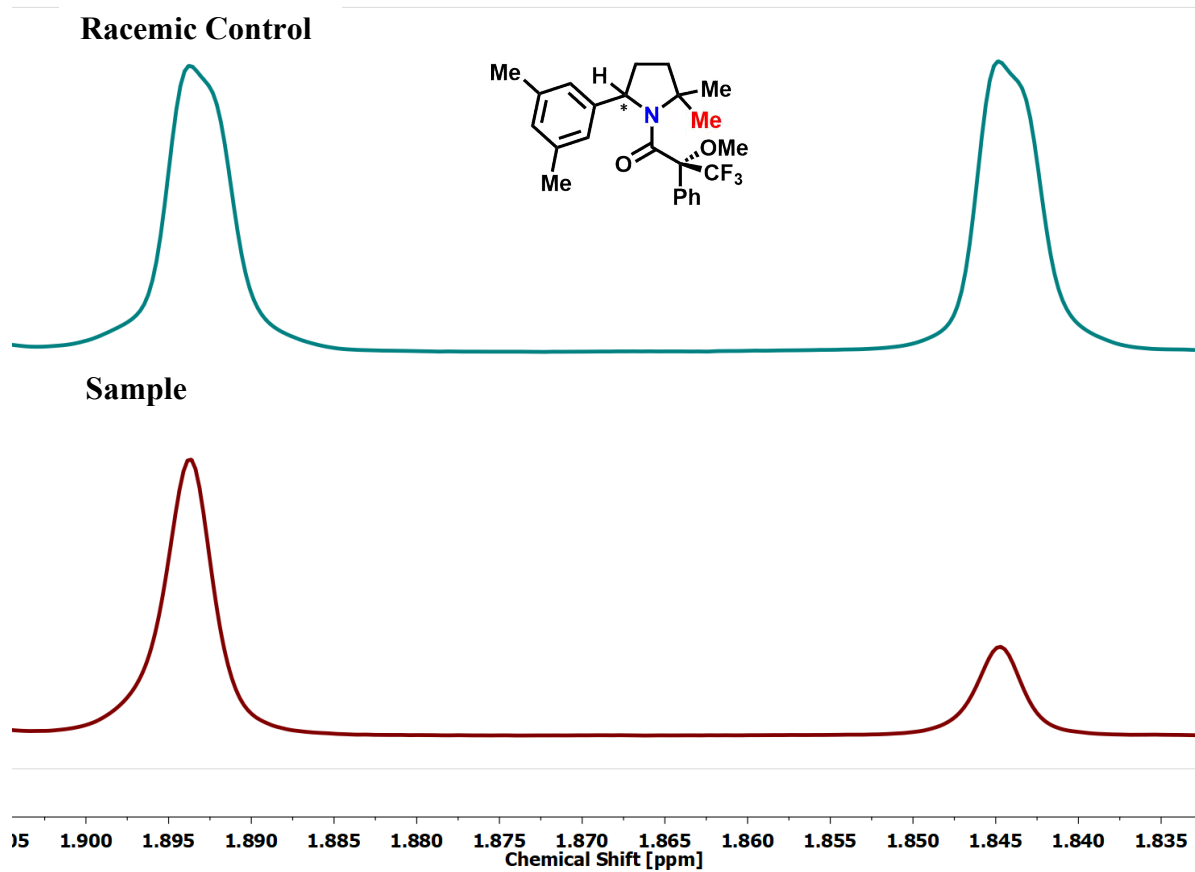

**Integration Table**

|                        | <b>1.90–1.88</b> | <b>1.85–1.83</b> | <b>ee%</b> |
|------------------------|------------------|------------------|------------|
| <b>Racemic Control</b> | 376.05           | 366.07           | 1%         |
| <b>Sample</b>          | 282.21           | 89.86            | 52%        |

### Racemic Control

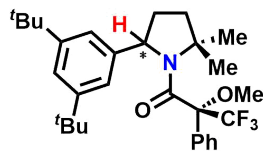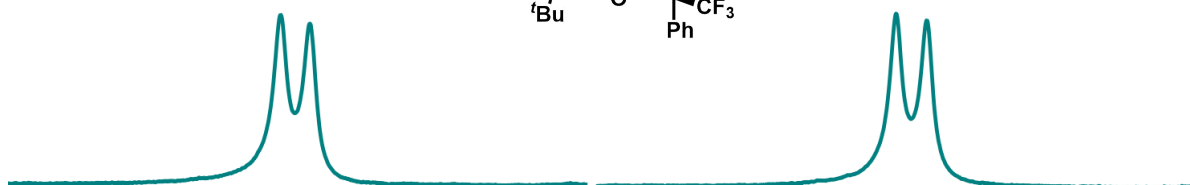

### Sample

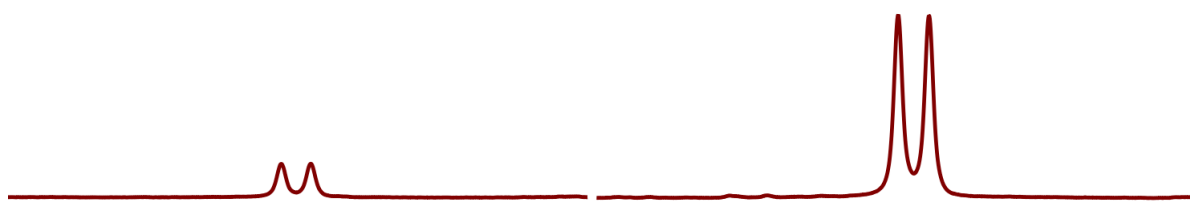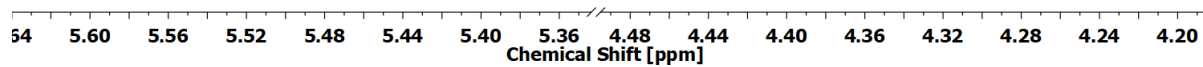

### Integration Table

|                        | 5.55–5.45 | 4.38–4.28 | ee% |
|------------------------|-----------|-----------|-----|
| <b>Racemic Control</b> | 197.73    | 198.44    | 0   |
| <b>Sample</b>          | 69.51     | 450.47    | 73% |

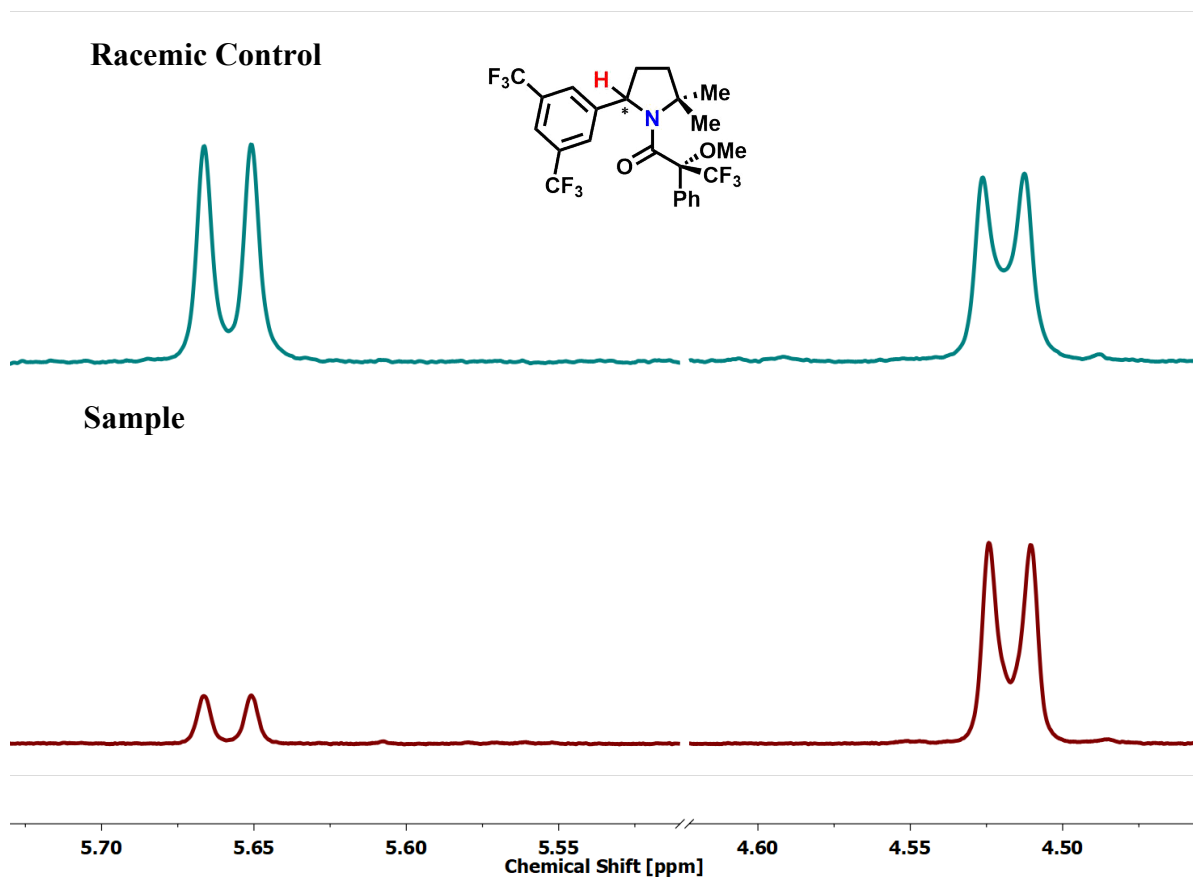

**Integration Table**

|                        | 5.70–5.60 | 4.57–4.47 | ee% |
|------------------------|-----------|-----------|-----|
| <b>Racemic Control</b> | 61.36     | 62.08     | 1%  |
| <b>Sample</b>          | 97.35     | 496.89    | 67% |

### Racemic Control

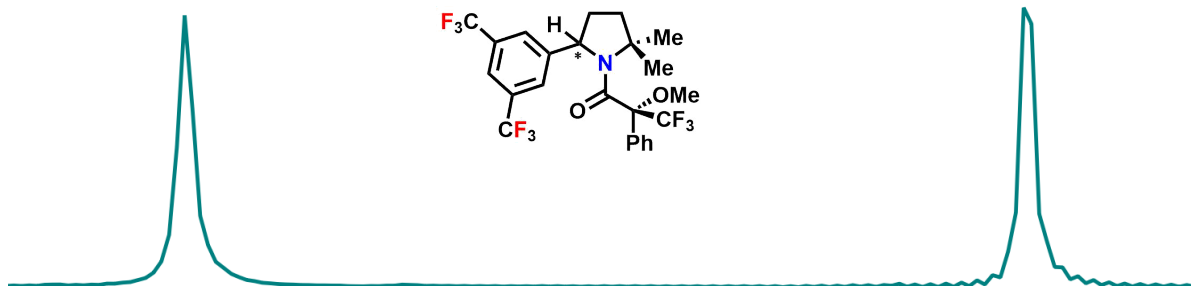

### Sample

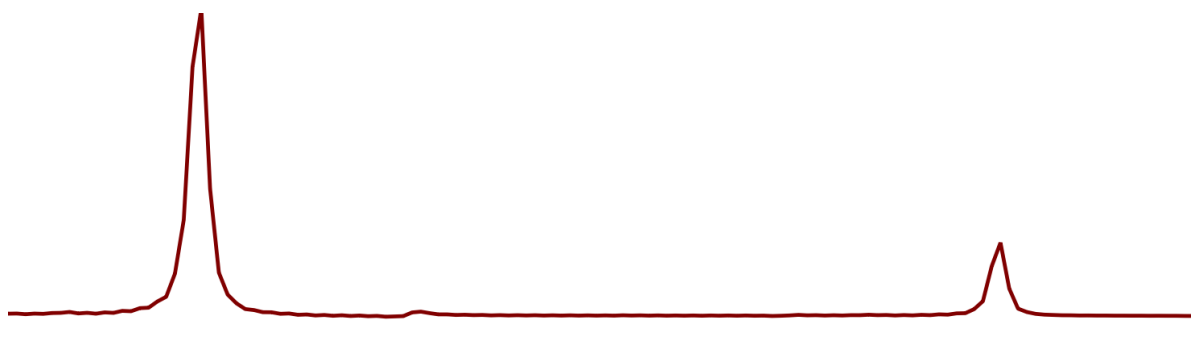

-62.98 -63.00 -63.02 -63.04 -63.06 -63.08 -63.10 -63.12 -63.14 -63.16 -63.18 -63.2  
Chemical Shift [ppm]

### Integration Table

|                        | -62.97 – -63.04 | -63.13 – -63.20 | ee% |
|------------------------|-----------------|-----------------|-----|
| <b>Racemic Control</b> | 7628.98         | 7290.50         | 2%  |
| <b>Sample</b>          | 25389.70        | 4859.21         | 68% |



### Racemic Control

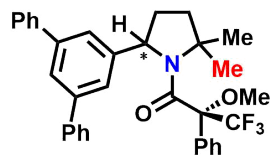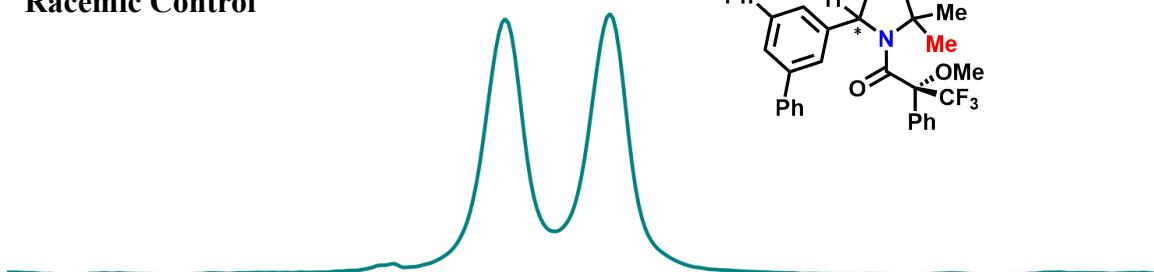

### Sample

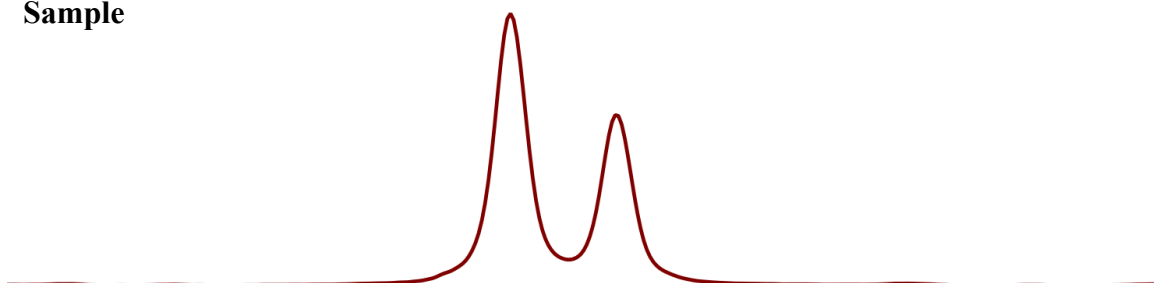

2.005 2.000 1.995 1.990 1.985 1.980 1.975 1.970 1.965 1.960 1.955 1.950 1.945 1.940 1.935 1.930 1.925 1.9

Chemical Shift [ppm]

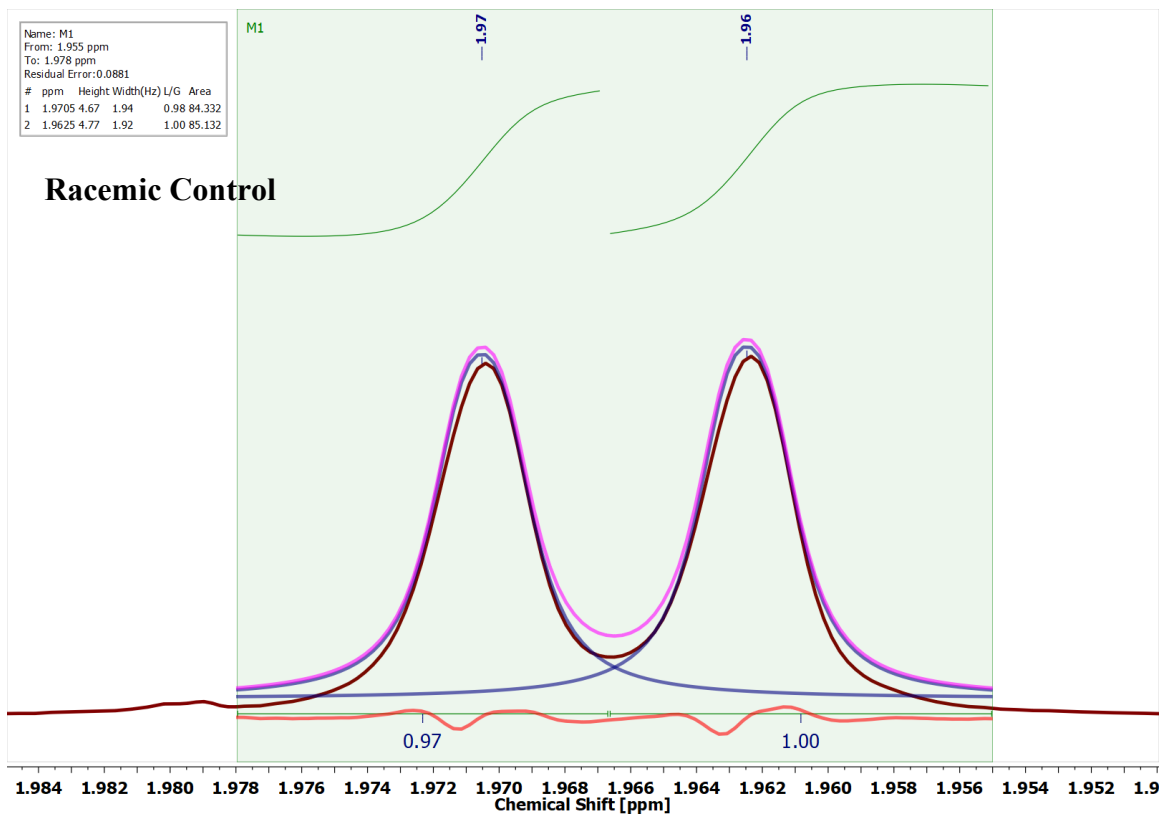

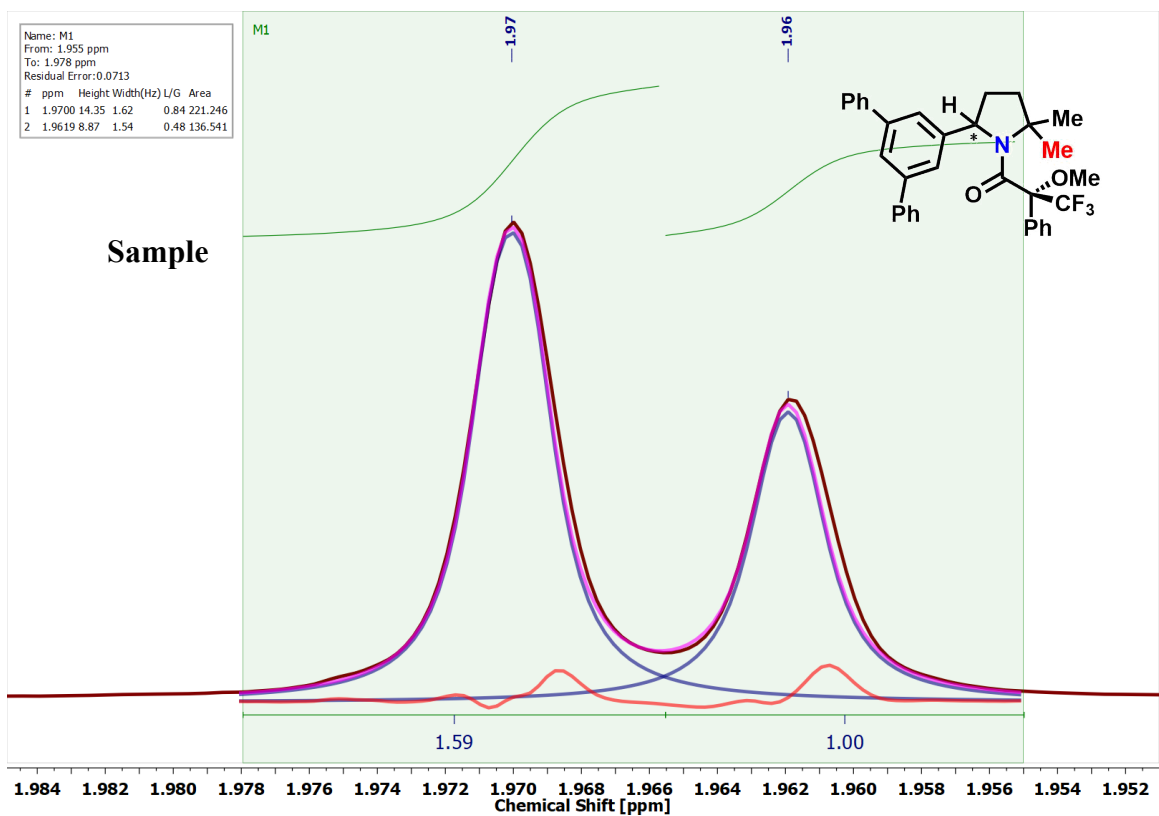

### Integration Table

|                        | $\delta = 1.97$ ppm, (s) | $\delta = 1.96$ ppm, (s) | ee% |
|------------------------|--------------------------|--------------------------|-----|
| <b>Racemic Control</b> | 84.322                   | 85.132                   | 0%  |
| <b>Sample</b>          | 221.246                  | 136.541                  | 24% |

## Chiral GC spectra for ee determination

2,2,5-trimethyl-5-phenylpyrrolidine

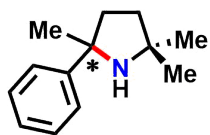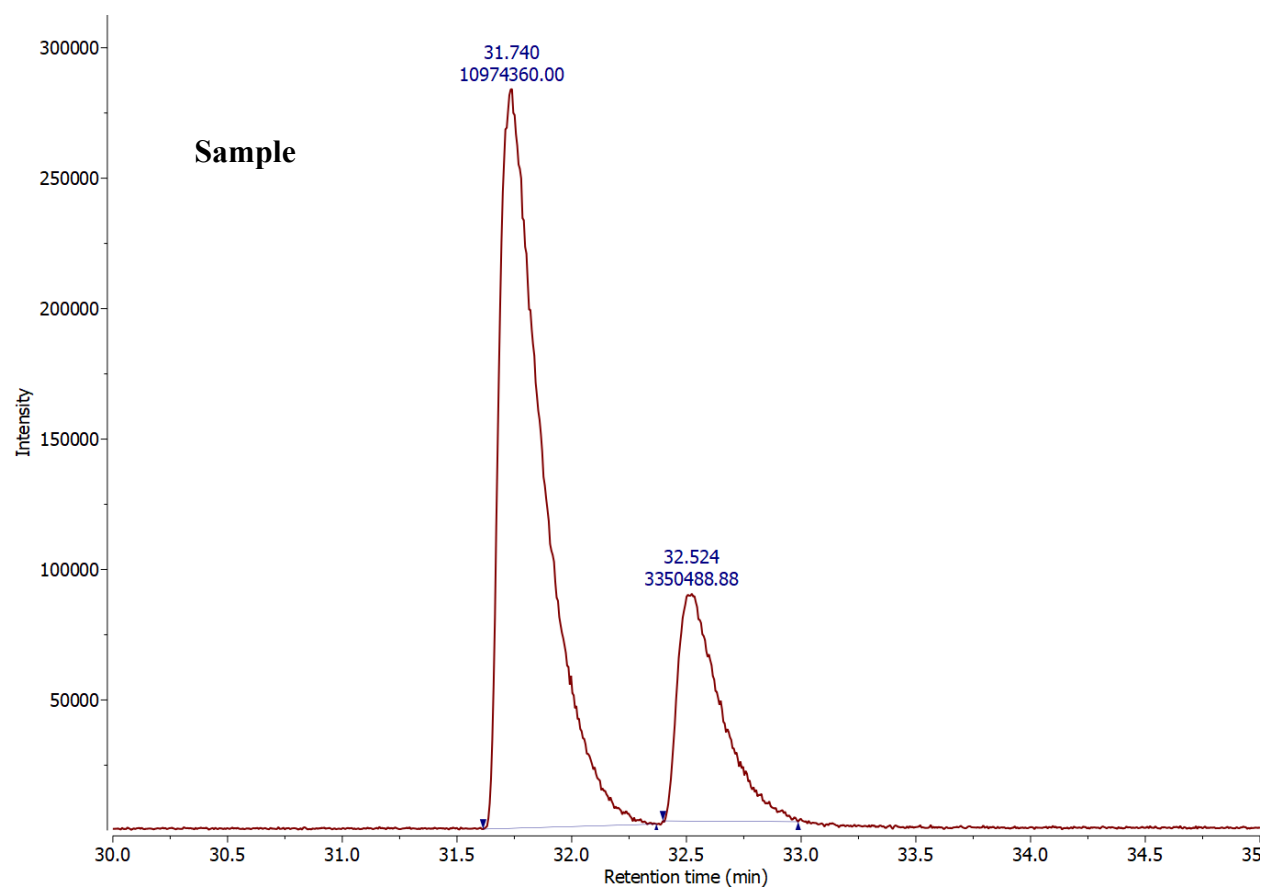

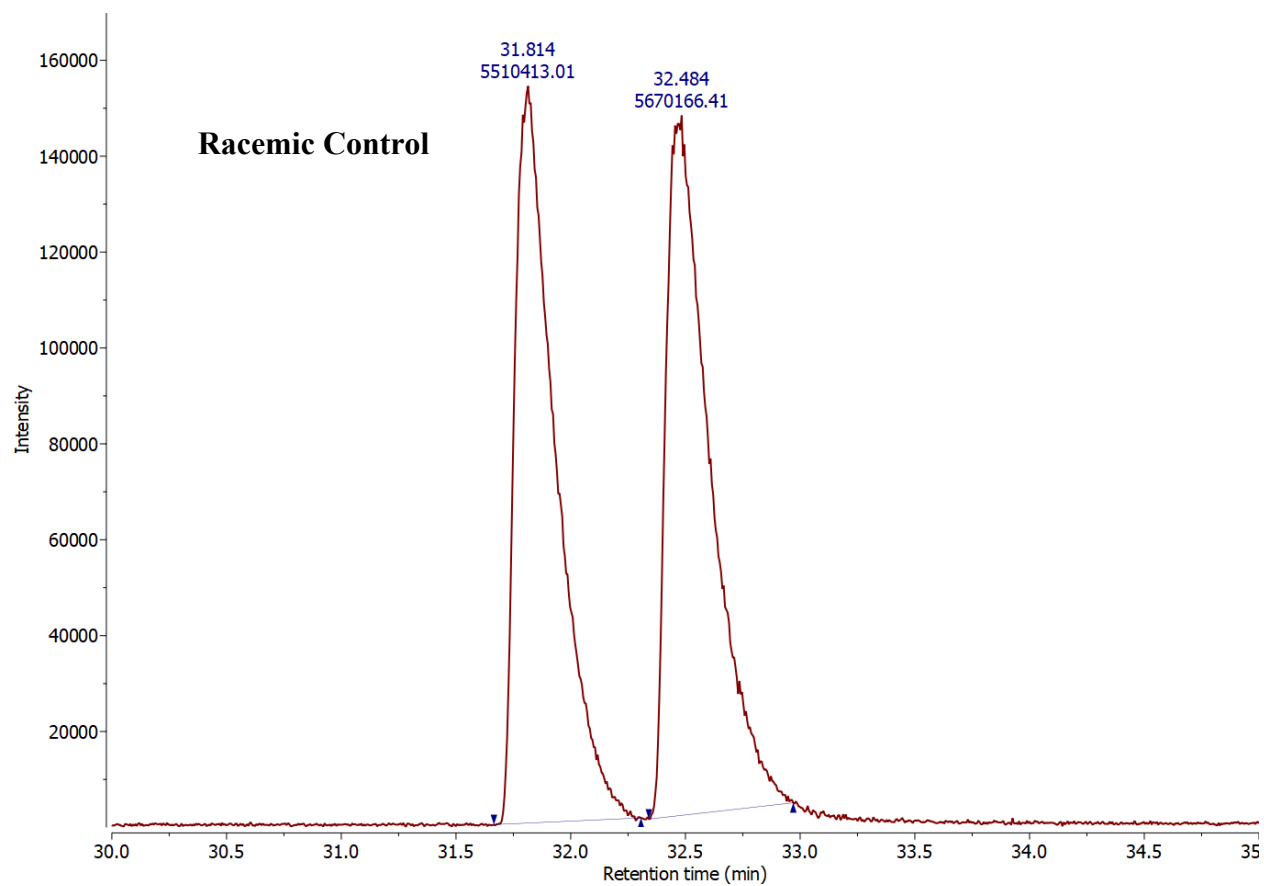

### Integration Table

|                        | 31.6–32.4 min | 32.4–32.9 min | ee% |
|------------------------|---------------|---------------|-----|
| <b>Racemic Control</b> | 5510413.01    | 5670166.41    | -1% |
| <b>Sample</b>          | 10974360.00   | 3350488.88    | 53% |

2,2-dimethyl-5-ethyl-5-phenylpyrrolidine

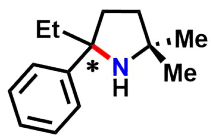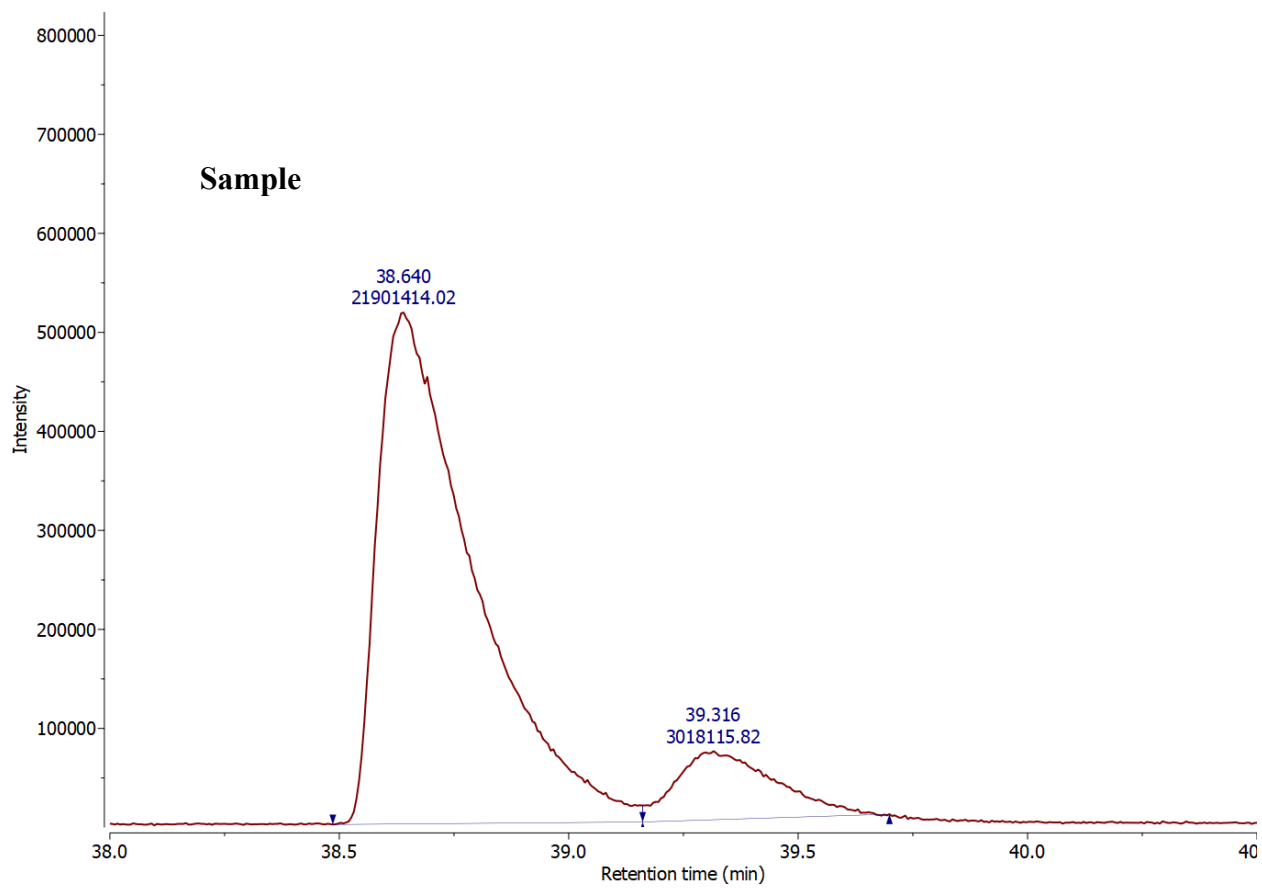

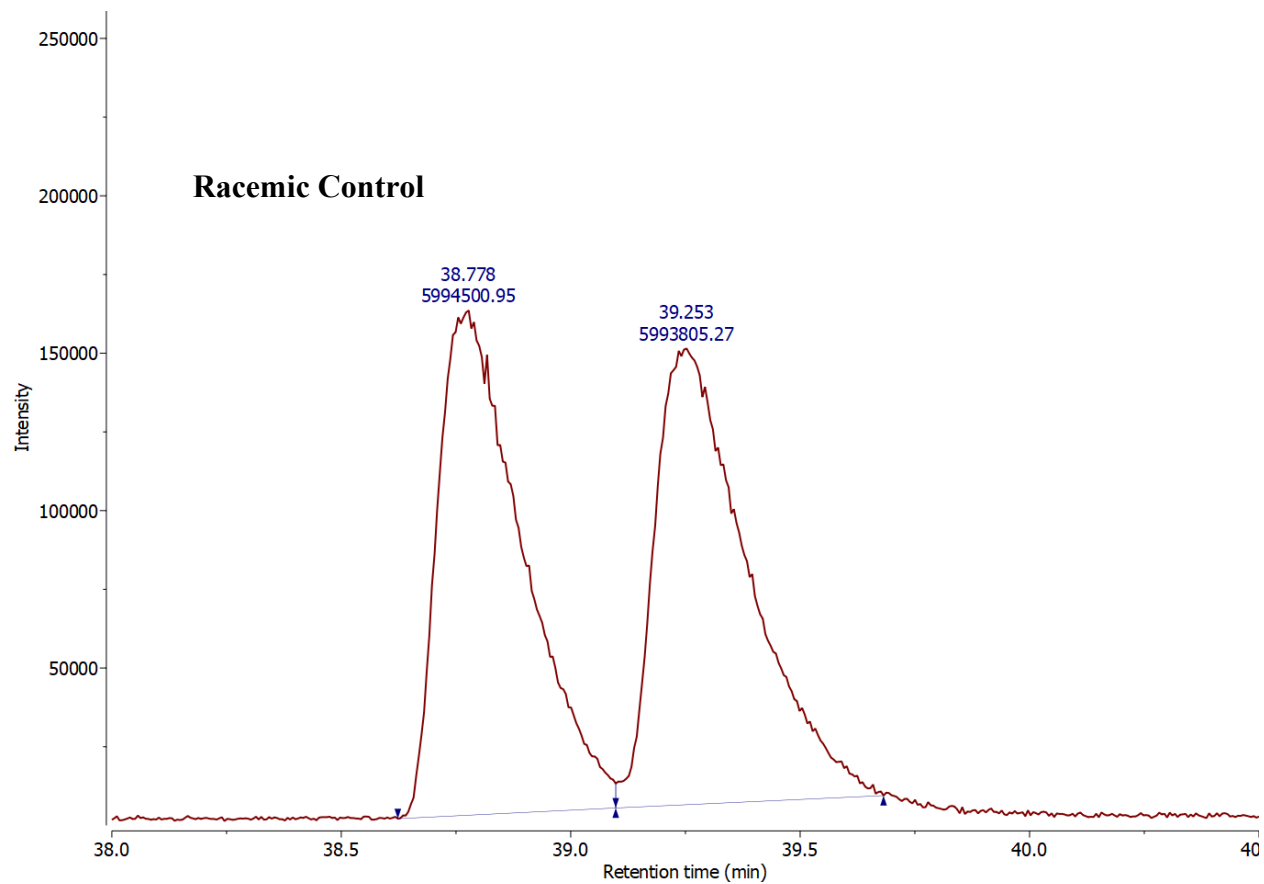

**Integration Table**

|                        | <b>38.5–39.2 min</b> | <b>39.2–39.7 min</b> | <b>ee%</b> |
|------------------------|----------------------|----------------------|------------|
| <b>Racemic Control</b> | 5994500.95           | 5993805.27           | 0%         |
| <b>Sample</b>          | 21901414.02          | 3018115.82           | 76%        |

2-(3,5-dimethylphenyl)-2,5,5-trimethylpyrrolidine

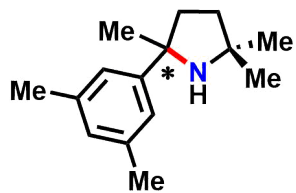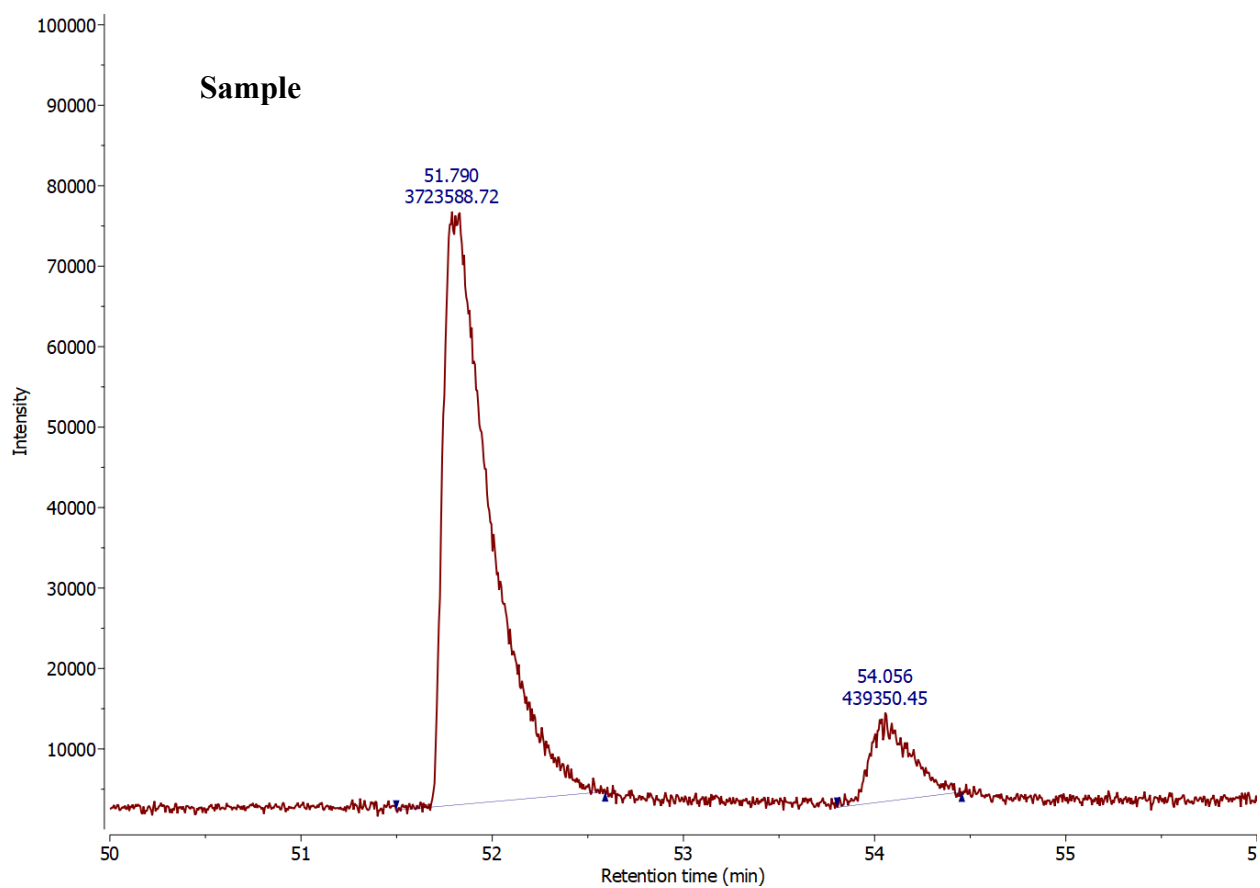

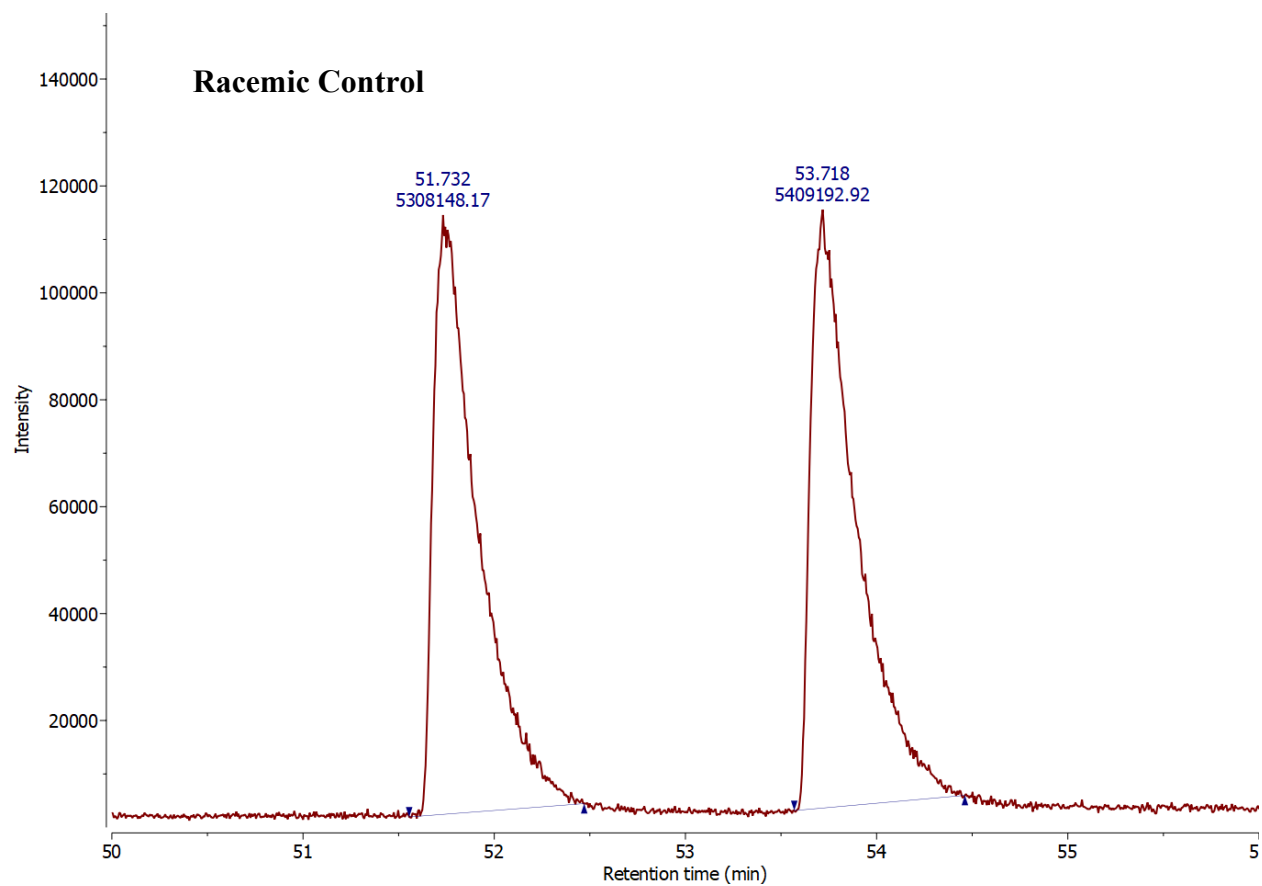

### Integration Table

|                        | 51.5–52.6 min | 53.8–54.4 min | ee% |
|------------------------|---------------|---------------|-----|
| <b>Racemic Control</b> | 5308148.17    | 5409192.92    | –1% |
| <b>Sample</b>          | 3723588.72    | 439350.45     | 79% |



2-(3,5-di-tert-butylphenyl)-2,5,5-trimethylpyrrolidine

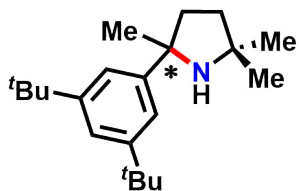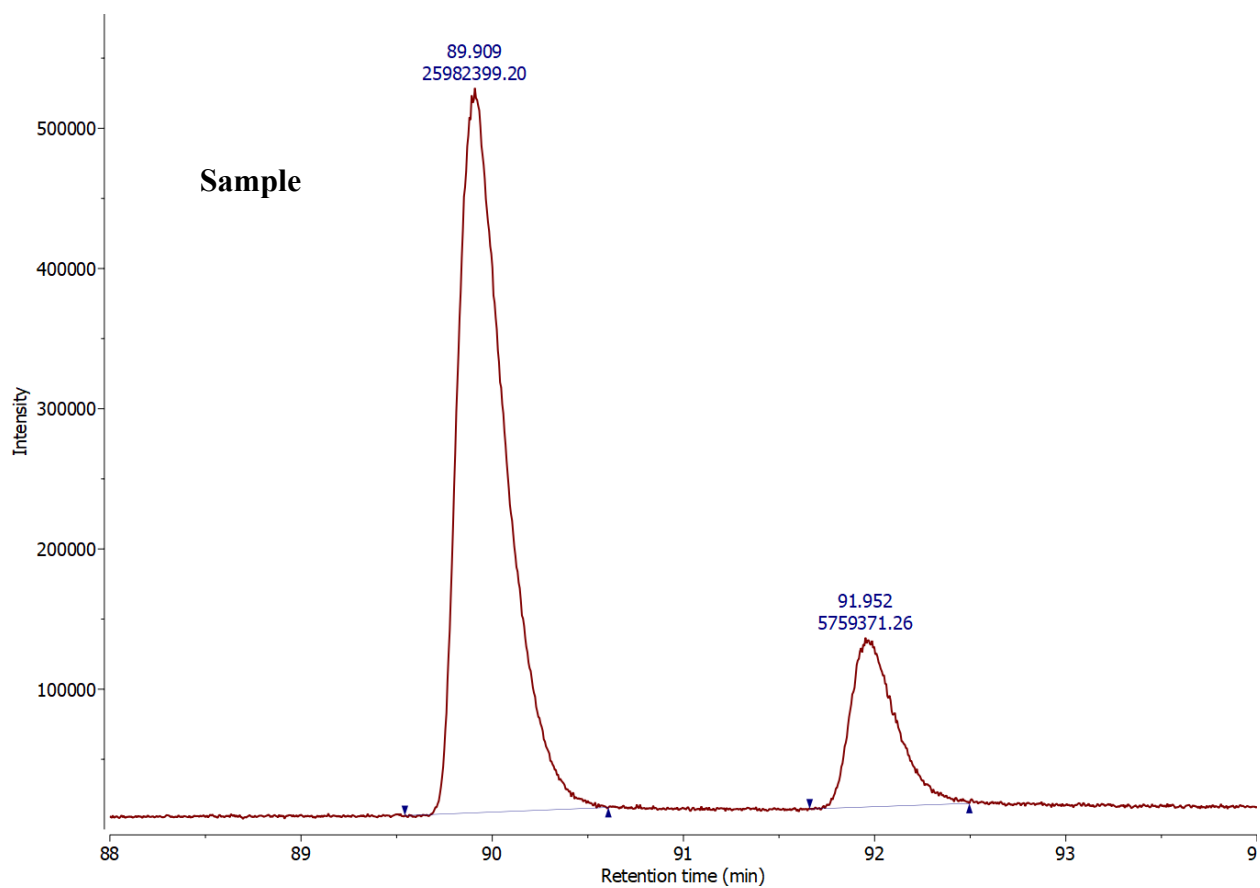

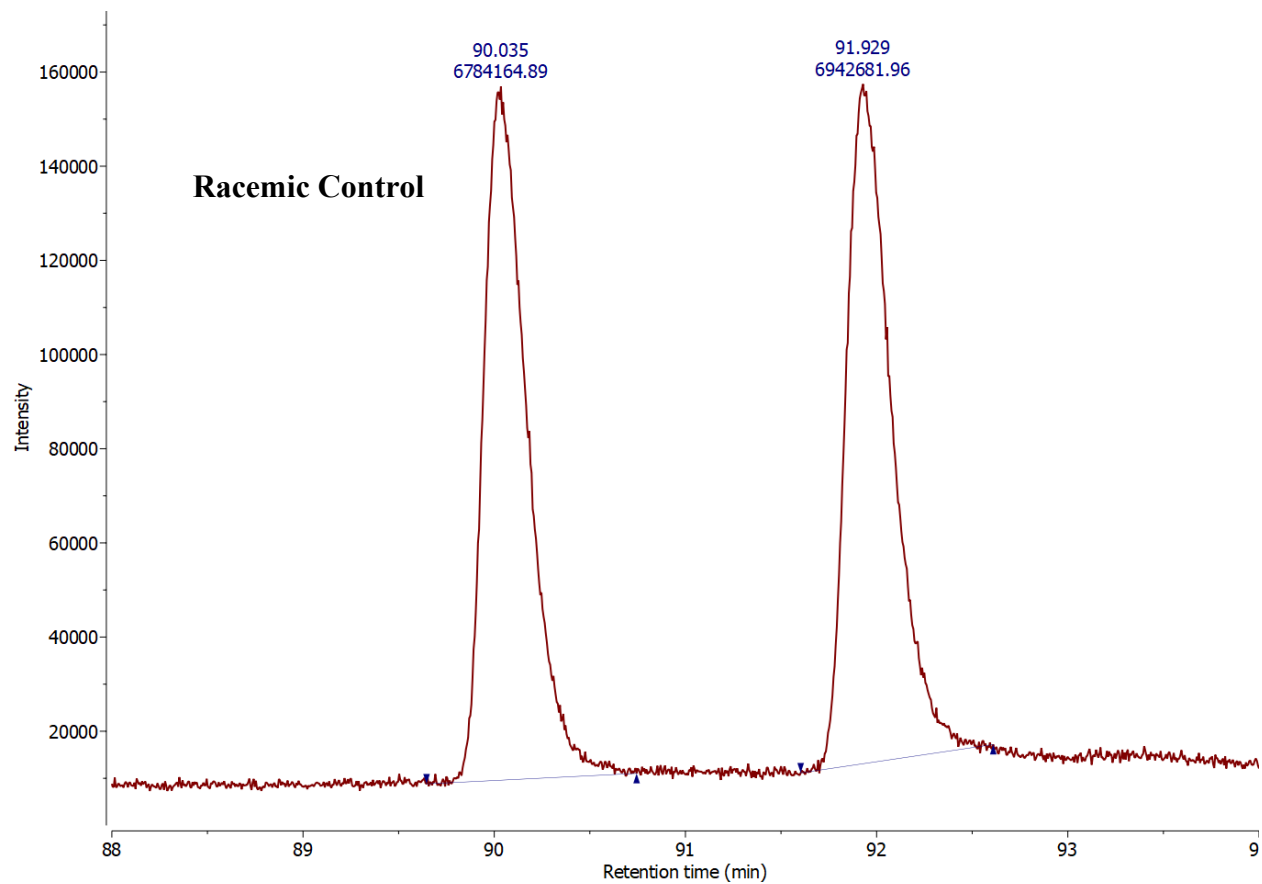

### Integration Table

|                        | 89.5–90.6 min | 91.6–92.5 min | ee% |
|------------------------|---------------|---------------|-----|
| <b>Racemic Control</b> | 6784164.89    | 6942681.96    | –1% |
| <b>Sample</b>          | 25982399.20   | 5759371.26    | 64% |

## 2,2,3,3-tetramethyl-5-phenylpyrrolidine

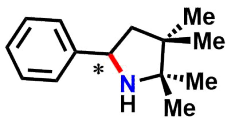

### Acylation with acetyl chloride first

Acylation Procedure: To an NMR tube was added 6 mg of 2,2,3,3-tetramethyl-5-phenylpyrrolidine solution in 0.6 ml of  $\text{CDCl}_3$ , followed by 2.3  $\mu\text{l}$  of acetyl chloride (1.1 equiv) and 4.5  $\mu\text{l}$  of triethylamine (1.1 equiv). The NMR tube was capped, and the solution was shaken to be fully mixed and left at room temperature (23 °C). The reaction is fully complete in 2 h as indicated by  $^1\text{H}$  NMR spectroscopy.

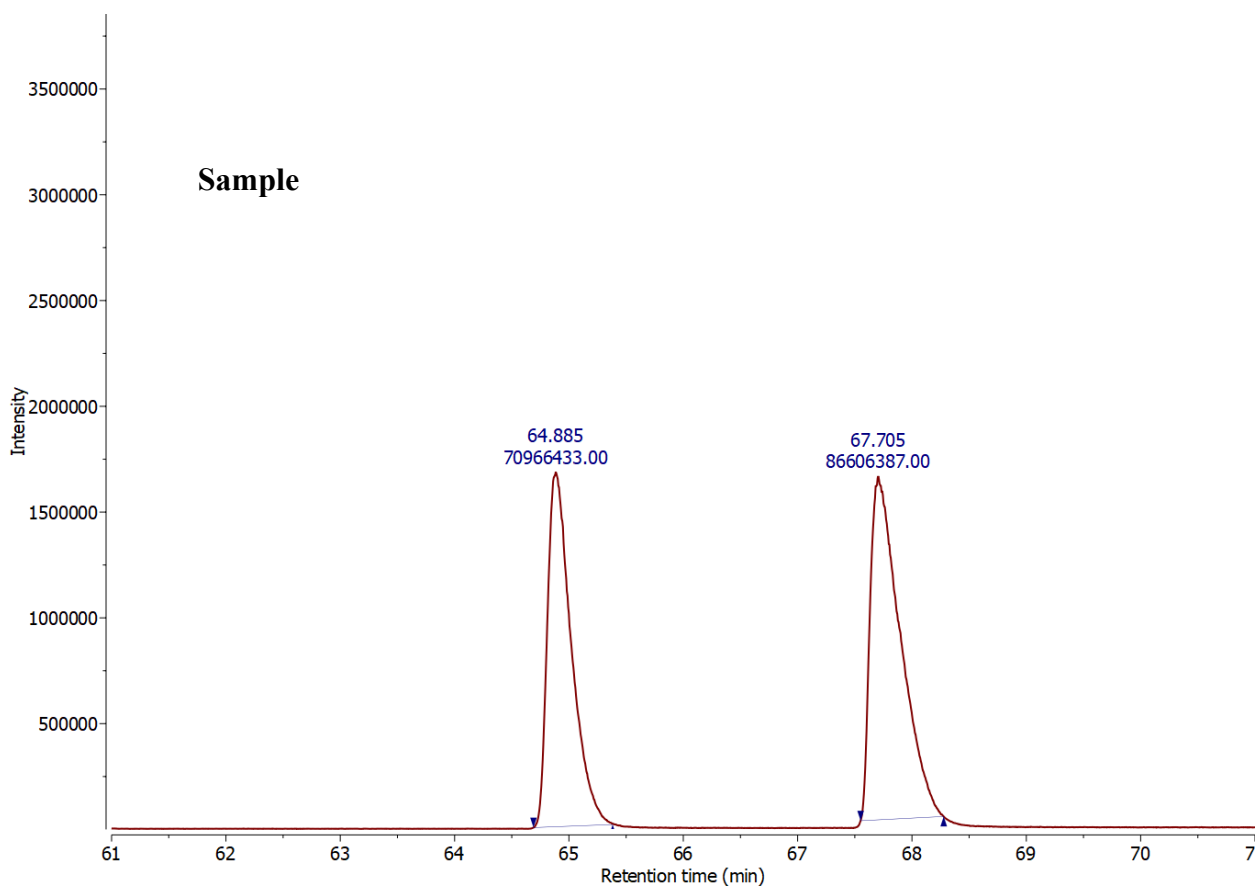

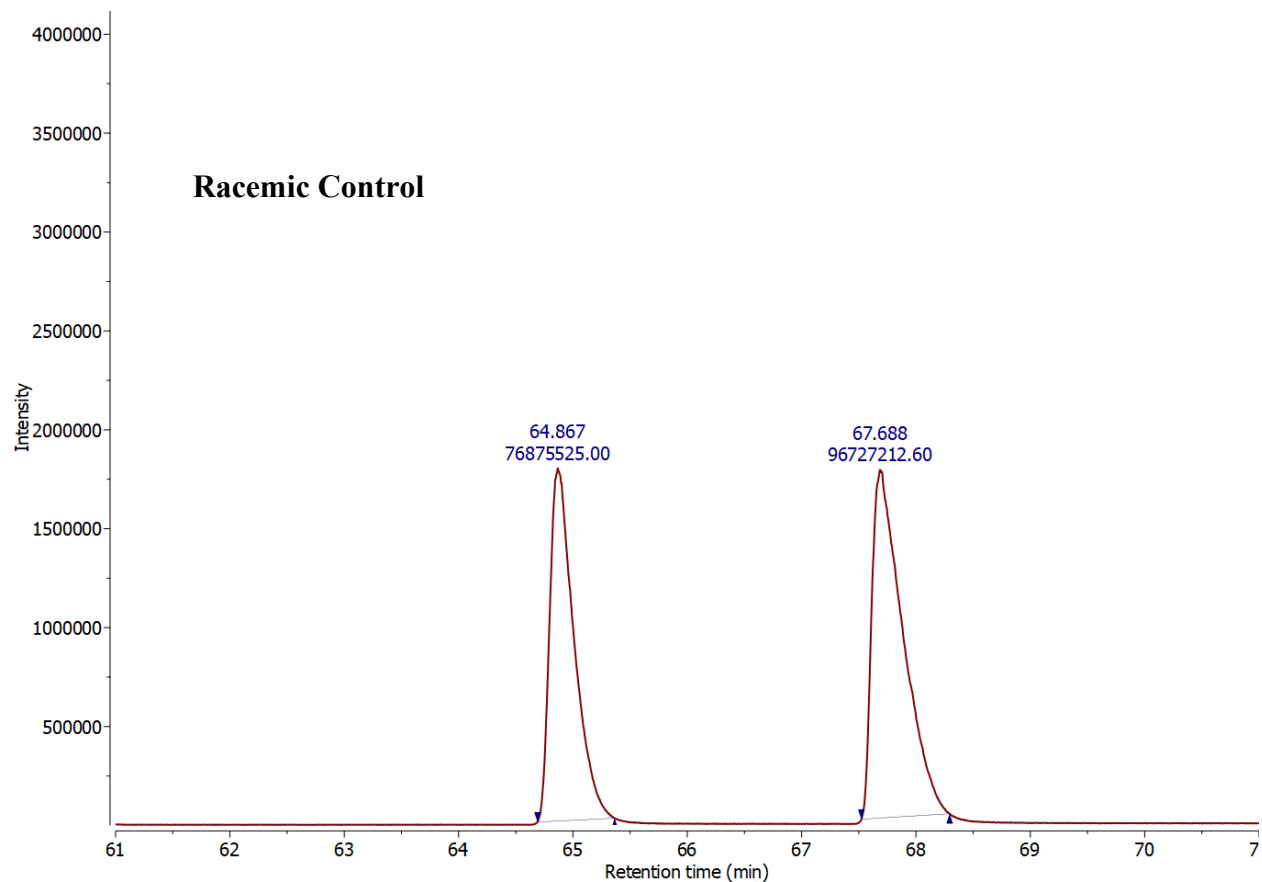

### Integration Table

|                        | 64.7–65.4 min | 67.5–68.3 min | ee% |
|------------------------|---------------|---------------|-----|
| <b>Racemic Control</b> | 76875525.00   | 96727212.60   | 11% |
| <b>Sample</b>          | 70966433.00   | 86606387.00   | 10% |

The non-zero ee% of the racemic control is likely due to baseline and line broadening. The difference in ee% obtained from both racemic control and sample of interest is 1%; therefore, the mixture is determined to be fully racemic (0% ee).

## X-ray diffraction techniques

Structures of **3-6** were collected on a Bruker three-circle platform goniometer equipped with an Apex II CCD and an Oxford cryostream cooling device. Radiation was from a graphite fine focus sealed tube Mo K $\alpha$  (0.71073 Å) source or a I/mS microfocus tube Cu K $\alpha$  (1.54178 Å) source. Crystals were mounted on a cryoloop or glass fiber pin using Paratone N oil. Structures were collected at 100 K. Data were collected as a series of  $\varphi$  and/or  $\omega$  scans.

Data were integrated using SAINT and scaled with multi-scan absorption correction using SADABS.<sup>20-</sup>

<sup>21</sup> The structures were solved by intrinsic phasing, direct methods or Patterson maps using SHELXS-2014 and refined against  $F^2$  on all data by full matrix least squares with SHELXL-2014.<sup>20-21</sup> All non-hydrogen atoms were refined anisotropically. Hydrogen atoms were placed at idealized positions and refined using a riding model. The isotropic displacement parameters of all hydrogen atoms were constrained to be 1.2 times the parameter of the atoms they were linked to (1.5 times for methyl groups). Further details on particular structures are noted below.

**(Tr<sup>H</sup>BOX)Ni(py) (3):** The structure was solved in the monoclinic space group  $P2_1$  with two molecules per unit cell and one molecule in the asymmetric unit. (CCDC 1971707)

**(Tr<sup>H</sup>BOX)Ni(py) (4):** The structure was solved in the orthorhombic space group  $P2_12_12_1$  with four molecules per unit cell and one molecule in the asymmetric unit. The asymmetric unit also contained half of a molecule of pyridine and disordered THF, in which the crystal was grown. The molecule has one rotational disordered pyridine molecule bound to Ni. (CCDC 1971708)

**(Tr<sup>H</sup>BOX)Ni( $\kappa^2$ -N<sub>4</sub>Ad<sub>2</sub>) (5):** The structure was solved in the monoclinic space group  $P2_1$  with two molecules per unit cell and one molecule in the asymmetric unit. The asymmetric unit also contained one molecule of hexane, in which the crystal was grown (CCDC 1971709)

**(Tr<sup>H</sup>BOX)Ni(NAd) (6):** The structure was solved in the orthorhombic space group  $P2_12_12_1$  with eight molecules per unit cell and two molecules in the asymmetric unit. Cracking of the crystal even under

cryogenic stream was observed. Due to the low crystal quality, several atoms were refined using thermal ellipsoid restraints and constraints, and disordered solvents in the asymmetric unit is refined using solvent mask.<sup>20-21</sup> (CCDC 1971710)

**Table S2. X-ray diffraction experimental details**

|                                                                  | ( <sup>TrH</sup> BOX)NiI(py) (3)                                 | ( <sup>TrH</sup> BOX)Ni(py) (4)                                                                                                                |
|------------------------------------------------------------------|------------------------------------------------------------------|------------------------------------------------------------------------------------------------------------------------------------------------|
| <b>Moiety Formula</b>                                            | C <sub>50</sub> H <sub>42</sub> IN <sub>3</sub> NiO <sub>2</sub> | C <sub>50</sub> H <sub>42</sub> N <sub>3</sub> NiO <sub>2</sub> ·<br>0.5 C <sub>2</sub> H <sub>4</sub> O · 0.5 C <sub>5</sub> H <sub>5</sub> N |
| <b>FW</b>                                                        | 902.46                                                           | 851.18                                                                                                                                         |
| <b>Crystal System</b>                                            | Monoclinic                                                       | Orthorhombic                                                                                                                                   |
| <b>Space Group (Z)</b>                                           | P2 <sub>1</sub>                                                  | P2 <sub>1</sub> 2 <sub>1</sub> 2 <sub>1</sub>                                                                                                  |
| <b>a (Å)</b>                                                     | 8.8548(7)                                                        | 10.06432(11)                                                                                                                                   |
| <b>b (Å)</b>                                                     | 27.5888(19)                                                      | 13.6461(2)                                                                                                                                     |
| <b>c (Å)</b>                                                     | 9.0559(7)                                                        | 35.0160(4)                                                                                                                                     |
| <b>α (°)</b>                                                     | 90                                                               | 90                                                                                                                                             |
| <b>β (°)</b>                                                     | 115.112(5)                                                       | 90                                                                                                                                             |
| <b>γ (°)</b>                                                     | 90                                                               | 90                                                                                                                                             |
| <b>Volume (Å<sup>3</sup>)</b>                                    | 2003.2(3)                                                        | 4809.05(10)                                                                                                                                    |
| <b>Calc. ρ (mg/m<sup>3</sup>)</b>                                | 1.496                                                            | 1.176                                                                                                                                          |
| <b>μ (cm<sup>-1</sup>)</b>                                       | 7.100                                                            | 0.920                                                                                                                                          |
| <b>Crystal size (mm)</b>                                         | 0.14×0.04×0.04                                                   | 0.20×0.05×0.05                                                                                                                                 |
| <b>Reflections</b>                                               | 7092                                                             | 8478                                                                                                                                           |
| <b>Completeness (to 2θ)</b>                                      | 0.977                                                            | 0.954                                                                                                                                          |
| <b>GOF on F<sup>2</sup></b>                                      | 0.973                                                            | 1.048                                                                                                                                          |
| <b>R<sub>1</sub>, wR<sub>2</sub><sup>c</sup> [I &gt; 2σ(I) ]</b> | 0.0477, 0.1010                                                   | 0.0635, 0.1794                                                                                                                                 |

|                                                                                   | <b>(<sup>TrH</sup>BOX)Ni(<math>\kappa^2</math>-N<sub>4</sub>Ad<sub>2</sub>) (5)</b>              | <b>(<sup>TrH</sup>BOX)Ni(NAd) (6)</b>                           |
|-----------------------------------------------------------------------------------|--------------------------------------------------------------------------------------------------|-----------------------------------------------------------------|
| <b>Moiety Formula</b>                                                             | C <sub>65</sub> H <sub>67</sub> N <sub>6</sub> NiO <sub>2</sub> · C <sub>6</sub> H <sub>14</sub> | C <sub>55</sub> H <sub>52</sub> N <sub>3</sub> NiO <sub>2</sub> |
| <b>FW</b>                                                                         | 1109.11                                                                                          | 845.69                                                          |
| <b>Crystal System</b>                                                             | Monoclinic                                                                                       | Orthorhombic                                                    |
| <b>Space Group (Z)</b>                                                            | P2 <sub>1</sub>                                                                                  | P2 <sub>1</sub> 2 <sub>1</sub> 2 <sub>1</sub>                   |
| <b>a (Å)</b>                                                                      | 15.9739(11)                                                                                      | 9.6441(8)                                                       |
| <b>b (Å)</b>                                                                      | 10.4011(8)                                                                                       | 28.862(2)                                                       |
| <b>c (Å)</b>                                                                      | 18.7687(15)                                                                                      | 42.241(2)                                                       |
| <b><math>\alpha</math> (°)</b>                                                    | 90                                                                                               | 90                                                              |
| <b><math>\beta</math> (°)</b>                                                     | 111.217(4)                                                                                       | 90                                                              |
| <b><math>\gamma</math> (°)</b>                                                    | 90                                                                                               | 90                                                              |
| <b>Volume (Å<sup>3</sup>)</b>                                                     | 2907.0(4)                                                                                        | 11757.7(14)                                                     |
| <b>Calc. <math>\rho</math> (mg/m<sup>3</sup>)</b>                                 | 1.267                                                                                            | 0.956                                                           |
| <b><math>\mu</math> (mm<sup>-1</sup>)</b>                                         | 0.884                                                                                            | 0.365                                                           |
| <b>Crystal size (mm)</b>                                                          | 0.20×0.18×0.04                                                                                   | 0.14×0.04×0.03                                                  |
| <b>Reflections</b>                                                                | 10307                                                                                            | 21009                                                           |
| <b>Completeness (to 2<math>\theta</math>)</b>                                     | 0.992                                                                                            | 0.995                                                           |
| <b>GOF on F<sup>2</sup></b>                                                       | 1.024                                                                                            | 0.961                                                           |
| <b>R<sub>1</sub>, wR<sub>2</sub><sup>c</sup> [I &gt; 2<math>\sigma</math>(I)]</b> | 0.0472, 0.1254                                                                                   | 0.0820, 0.2031                                                  |



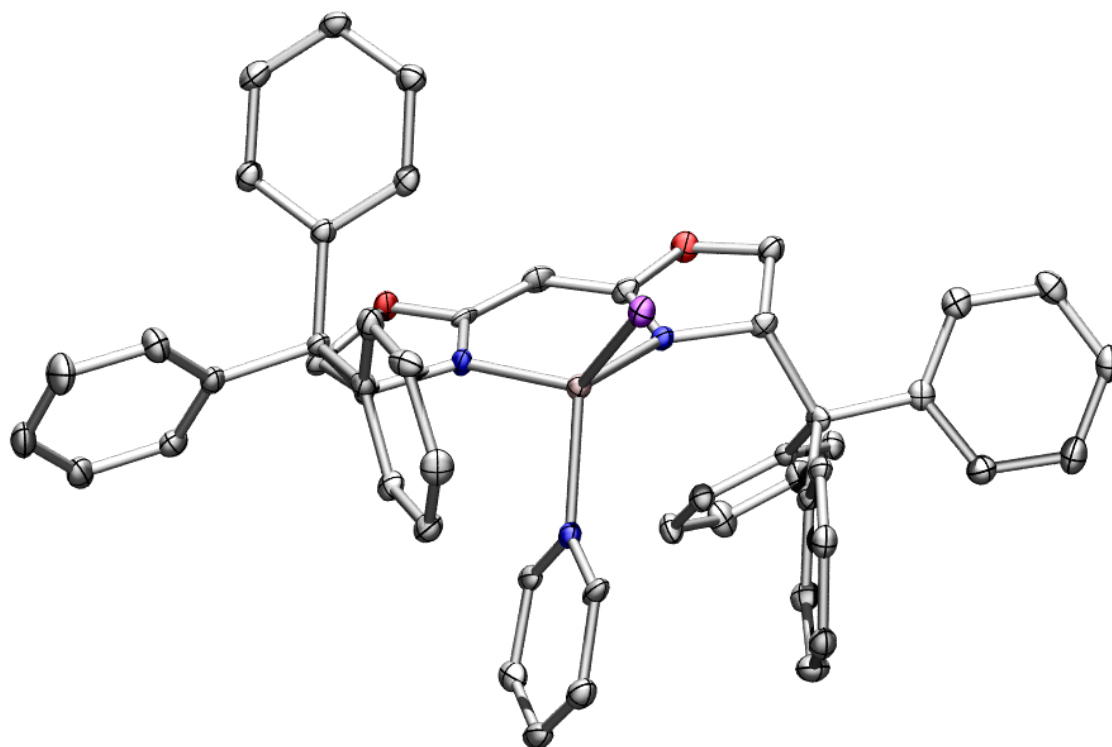

**Figure S13.** Solid-state molecular structure for  $(\text{Tr}^{\text{H}}\text{BOX})\text{Ni}(\text{py})$  (**3**) with thermal ellipsoids at 50% probability level. Hydrogen atoms omitted for clarity. nickel = pink, oxygen = red, nitrogen = blue, carbon = gray, iodine = purple.

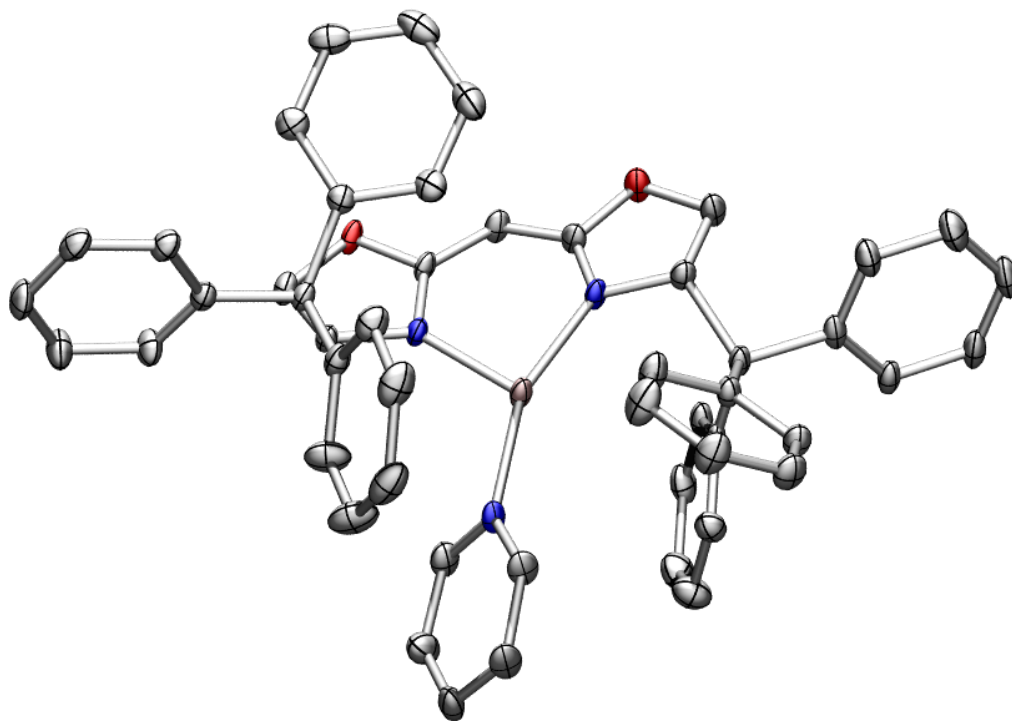

**Figure S14. Solid-state molecular structure for (Tr<sup>H</sup>BOX)Ni(py) (4) with thermal ellipsoids at 50% probability level. Hydrogen atoms omitted for clarity. nickel = pink, oxygen = red, nitrogen = blue, carbon = gray.**

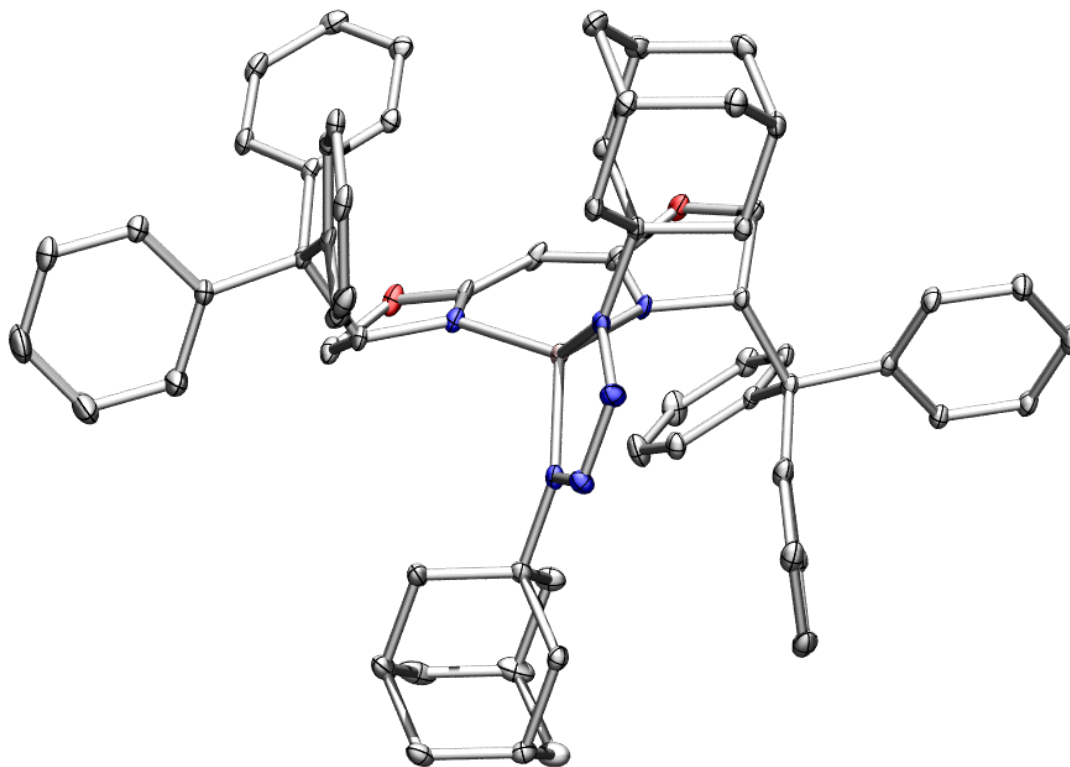

**Figure S15. Solid-state molecular structure for  $(\text{TrHBOX})\text{Ni}(\kappa^2\text{-N}_4\text{Ad}_2)$  (5) with thermal ellipsoids at 50% probability level. Hydrogen atoms omitted for clarity. nickel = pink, oxygen = red, nitrogen = blue, carbon = gray.**

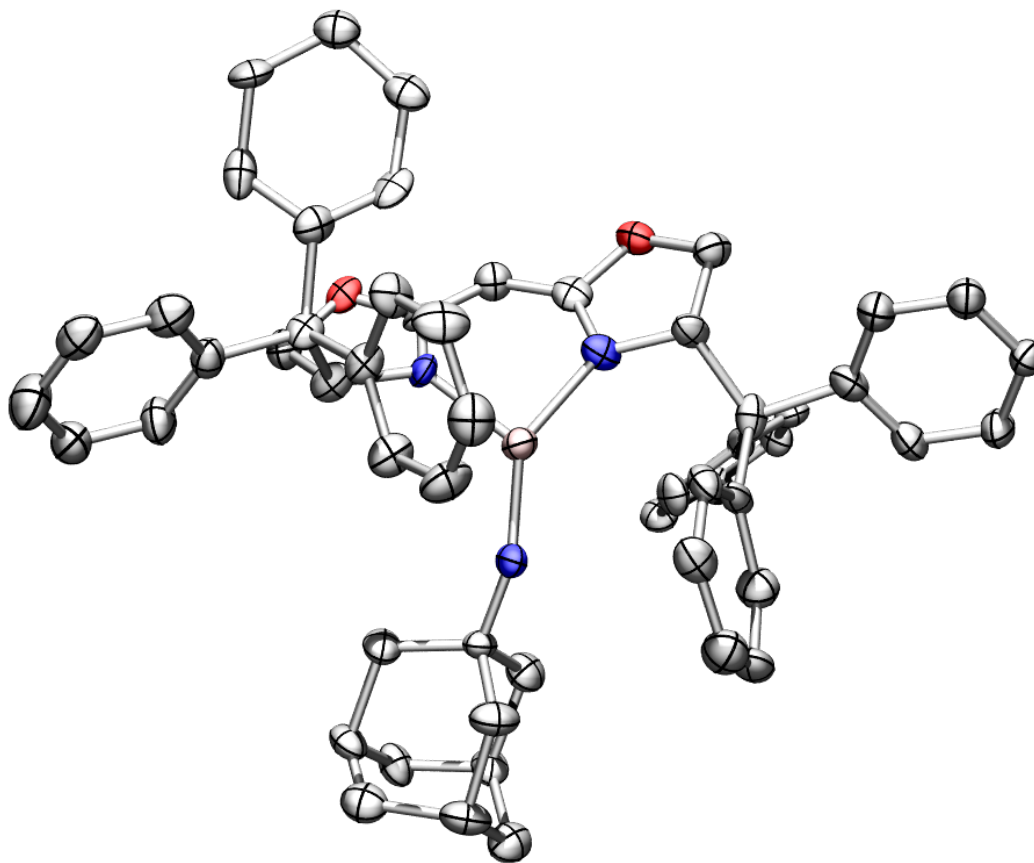

**Figure S16.** Solid-state molecular structure for (Tr<sup>H</sup>BOX)Ni(NAd) (**6**) with thermal ellipsoids at 50% probability level. Hydrogen atoms omitted for clarity. nickel = pink, oxygen = red, nitrogen = blue, carbon = gray.

## Computational Methods

1. Structure optimization and MO analysis of (<sup>TrH</sup>BOX)Ni(NAd) (**6**) and (<sup>AdF</sup>L)Ni(NAd).

Computations were carried out using the Orca program package.<sup>22</sup> The B3LYP<sup>23-26</sup> functional was used with the def2-TZVP (Ni, N), def2-SVP (C, H, O, F) basis sets and the W06 density fitting function of Ahlrich and co-workers'.<sup>27-28</sup> Frequency calculations were performed at the same level of theory in order to confirm the optimized structures were minima on the potential energy surfaces.

2. Potential energy surface for transformation from **9** to **10** catalyzed by (<sup>TrH</sup>BOX)Ni(py) (**4**).

All calculations employed the Gaussian16 suite of programs.<sup>29</sup> Structures were divided into two layers for computational analysis. The CPh<sub>3</sub> groups were placed in a lower level partition and modeled using molecular mechanics (MM) while the remainder of the molecule remained in a higher level partition and was modeled using quantum mechanics (QM).<sup>30</sup> All QM calculations were conducted at the B3LYP/6-31+G(d) level of theory; the 5D 7F (spherical harmonic) option was applied. For the MM simulation the UFF forcefield was used.<sup>31</sup> All calculated transition states possess one imaginary frequency while all minimization calcs exhibited zero. All calculations assumed 298.15 K and 1 atm.

**Optimized geometry coordinates for (TrHBOX)Ni(NAd) (6)**

|    |              |              |              |
|----|--------------|--------------|--------------|
| 28 | 2.367041000  | 16.789019000 | 30.649695000 |
| 8  | 4.786342000  | 13.979407000 | 29.069624000 |
| 8  | 3.637713000  | 17.993894000 | 26.929275000 |
| 7  | 2.608326000  | 17.708714000 | 28.914701000 |
| 7  | 2.358017000  | 17.016739000 | 32.362662000 |
| 7  | 3.094821000  | 15.097972000 | 30.036053000 |
| 6  | 2.153245000  | 20.260195000 | 29.140219000 |
| 6  | 5.439750000  | 16.944926000 | 34.612262000 |
| 6  | 4.028424000  | 15.097833000 | 29.089664000 |
| 6  | 1.394138000  | 20.215356000 | 30.498560000 |
| 6  | 4.273895000  | 16.081648000 | 28.131510000 |
| 6  | 1.456022000  | 21.425467000 | 28.373391000 |
| 6  | 0.540180000  | 13.488381000 | 30.719087000 |
| 6  | 4.642543000  | 16.826394000 | 33.299788000 |
| 6  | -0.603585000 | 13.290027000 | 29.924893000 |
| 6  | 0.242697000  | 19.431408000 | 30.684597000 |
| 6  | 1.975282000  | 18.911637000 | 28.333937000 |
| 6  | 1.904325000  | 12.814208000 | 30.397769000 |
| 6  | 3.119135000  | 13.792298000 | 30.717202000 |
| 6  | 1.968996000  | 11.575926000 | 31.343309000 |
| 6  | 2.585375000  | 18.954773000 | 26.909870000 |

|   |              |              |              |
|---|--------------|--------------|--------------|
| 6 | 2.009927000  | 12.383519000 | 28.914994000 |
| 6 | 2.631171000  | 16.018946000 | 34.601549000 |
| 6 | 5.247050000  | 18.358687000 | 35.198650000 |
| 6 | 3.494844000  | 17.242048000 | 28.043056000 |
| 6 | 2.946919000  | 18.479910000 | 34.181848000 |
| 6 | 1.760623000  | 21.079166000 | 31.548697000 |
| 6 | 0.128865000  | 23.605268000 | 27.117981000 |
| 6 | -0.502637000 | 19.497031000 | 31.867560000 |
| 6 | -0.176868000 | 22.291079000 | 26.765717000 |
| 6 | 5.742546000  | 20.091758000 | 30.545356000 |
| 6 | 1.737268000  | 22.761100000 | 28.723478000 |
| 6 | 0.476416000  | 21.218834000 | 27.387786000 |
| 6 | 4.371649000  | 19.889980000 | 30.366987000 |
| 6 | 3.668089000  | 20.513927000 | 29.320109000 |
| 6 | -1.982300000 | 14.556883000 | 31.469760000 |
| 6 | 3.752173000  | 18.594055000 | 35.490684000 |
| 6 | 0.954472000  | 10.600309000 | 31.252805000 |
| 6 | 0.378104000  | 14.220724000 | 31.907699000 |
| 6 | 3.437839000  | 16.133480000 | 35.909457000 |
| 6 | 4.412236000  | 21.303737000 | 28.423949000 |
| 6 | 5.787276000  | 21.500543000 | 28.592354000 |
| 6 | 2.499292000  | 11.122075000 | 28.532130000 |
| 6 | 3.254969000  | 17.543804000 | 36.503687000 |

|   |              |              |              |
|---|--------------|--------------|--------------|
| 6 | 4.488684000  | 13.241899000 | 30.257734000 |
| 6 | 1.951988000  | 9.281769000  | 33.025566000 |
| 6 | 0.943061000  | 9.472805000  | 32.073399000 |
| 6 | 2.960306000  | 10.237819000 | 33.139942000 |
| 6 | 1.092465000  | 23.832992000 | 28.107105000 |
| 6 | 1.686119000  | 13.292394000 | 27.888710000 |
| 6 | -0.119188000 | 20.355449000 | 32.898107000 |
| 6 | 1.017998000  | 21.151942000 | 32.728704000 |
| 6 | 2.966776000  | 11.370041000 | 32.311093000 |
| 6 | -0.859082000 | 14.754619000 | 32.276703000 |
| 6 | 2.648372000  | 10.775143000 | 27.184865000 |
| 6 | 3.125852000  | 17.059636000 | 33.552872000 |
| 6 | -1.847067000 | 13.814995000 | 30.294001000 |
| 6 | 6.457173000  | 20.909282000 | 29.665301000 |
| 6 | 4.931740000  | 15.890291000 | 35.614922000 |
| 6 | 2.310746000  | 11.684769000 | 26.182269000 |
| 6 | 1.830059000  | 12.946810000 | 26.543160000 |
| 1 | 3.274440000  | 19.238970000 | 33.455929000 |
| 1 | 1.875485000  | 18.657644000 | 34.362450000 |
| 1 | 4.997873000  | 17.561034000 | 32.559055000 |
| 1 | 4.783002000  | 15.827846000 | 32.851647000 |
| 1 | 2.734416000  | 15.003840000 | 34.180152000 |
| 1 | 1.557492000  | 16.185617000 | 34.787878000 |



|   |              |              |              |
|---|--------------|--------------|--------------|
| 1 | 3.071585000  | 15.377722000 | 36.625719000 |
| 1 | 6.509305000  | 16.770908000 | 34.399691000 |
| 1 | 3.607239000  | 19.607150000 | 35.906049000 |
| 1 | 5.840090000  | 18.474603000 | 36.122471000 |
| 1 | 5.618629000  | 19.115975000 | 34.486426000 |
| 1 | 3.817894000  | 17.632004000 | 37.448975000 |
| 1 | 2.192493000  | 17.720405000 | 36.746545000 |
| 1 | 5.514584000  | 15.936473000 | 36.550855000 |
| 1 | 5.077357000  | 14.877706000 | 35.197087000 |
| 1 | 5.028291000  | 15.898318000 | 27.370717000 |
| 1 | 0.897290000  | 18.721010000 | 28.257283000 |
| 1 | 3.006254000  | 19.925994000 | 26.623940000 |
| 1 | 1.851553000  | 18.654407000 | 26.142458000 |
| 1 | 3.119011000  | 13.964561000 | 31.799039000 |
| 1 | 5.274387000  | 13.450640000 | 31.006982000 |
| 1 | 4.501211000  | 12.174757000 | 30.005327000 |
| 1 | -0.104903000 | 18.756696000 | 29.901550000 |
| 1 | -1.386746000 | 18.864699000 | 31.978845000 |
| 1 | -0.698762000 | 20.402818000 | 33.823741000 |
| 1 | 1.338871000  | 21.831700000 | 33.523382000 |
| 1 | 2.648532000  | 21.704397000 | 31.450576000 |
| 1 | 2.482808000  | 22.974576000 | 29.490202000 |
| 1 | 1.349381000  | 24.852818000 | 28.407999000 |

|   |              |              |              |
|---|--------------|--------------|--------------|
| 1 | -0.378823000 | 24.441524000 | 26.631089000 |
| 1 | -0.930294000 | 22.085056000 | 26.000315000 |
| 1 | 0.191311000  | 20.212258000 | 27.081568000 |
| 1 | 3.834144000  | 19.241635000 | 31.058965000 |
| 1 | 3.915137000  | 21.804176000 | 27.591556000 |
| 1 | 6.331776000  | 22.128943000 | 27.882189000 |
| 1 | 7.525499000  | 21.086549000 | 29.817572000 |
| 1 | 6.255539000  | 19.605922000 | 31.379810000 |
| 1 | 1.223198000  | 14.378812000 | 32.574059000 |
| 1 | -0.940791000 | 15.326996000 | 33.204085000 |
| 1 | -2.951095000 | 14.971682000 | 31.761699000 |
| 1 | -2.714410000 | 13.632471000 | 29.653125000 |
| 1 | -0.534446000 | 12.710501000 | 29.003839000 |
| 1 | 1.308388000  | 14.281679000 | 28.147809000 |
| 1 | 1.563617000  | 13.673279000 | 25.771526000 |
| 1 | 2.424539000  | 11.411863000 | 25.129133000 |
| 1 | 3.035239000  | 9.786882000  | 26.921432000 |
| 1 | 2.764316000  | 10.386462000 | 29.292622000 |
| 1 | 0.157059000  | 10.725918000 | 30.517627000 |
| 1 | 0.139043000  | 8.738239000  | 31.968431000 |
| 1 | 1.949329000  | 8.397094000  | 33.667981000 |
| 1 | 3.756366000  | 10.109340000 | 33.879174000 |
| 1 | 3.776329000  | 12.086592000 | 32.451839000 |

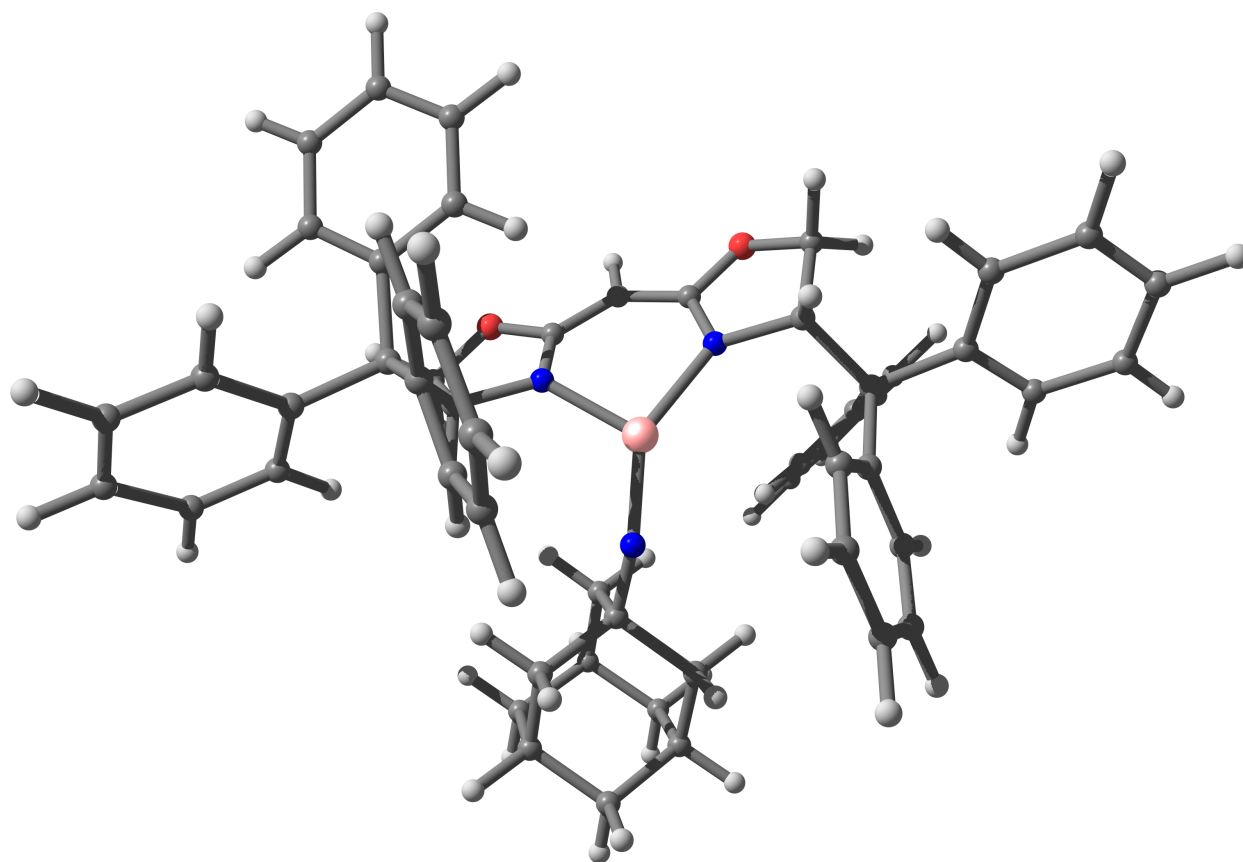

**Figure S17 DFT optimized structure for ( $\text{Tr}^{\text{H}}\text{BOX}$ )Ni(NAd) (6)** Color scheme: nickel = pink, oxygen = red, nitrogen = blue, carbon = gray, hydrogen = white.

**Optimized geometry coordinates for (<sup>AdF</sup>L)Ni(NAd)**

|    |              |              |              |
|----|--------------|--------------|--------------|
| 28 | -0.682410000 | -0.094835000 | -0.447639000 |
| 9  | 4.682797000  | 0.817745000  | -2.014996000 |
| 9  | 7.277081000  | 0.799062000  | -1.245513000 |
| 9  | 7.966030000  | -0.160130000 | 1.204270000  |
| 9  | 3.448016000  | -1.064468000 | 2.149647000  |
| 7  | 0.590816000  | -1.508861000 | -0.921963000 |
| 7  | -2.047687000 | -0.173002000 | 0.630112000  |
| 6  | -0.918140000 | -3.445257000 | -1.581765000 |
| 6  | -0.707864000 | -4.737135000 | -2.420741000 |
| 1  | -0.177539000 | -4.488892000 | -3.356799000 |
| 1  | -0.066447000 | -5.443257000 | -1.869160000 |
| 6  | -1.849527000 | -2.501785000 | -2.389675000 |
| 1  | -1.348148000 | -2.203604000 | -3.326386000 |
| 1  | -2.040771000 | -1.577499000 | -1.820665000 |
| 6  | -1.649184000 | -3.848755000 | -0.263194000 |
| 1  | -0.998295000 | -4.518474000 | 0.324356000  |
| 1  | -1.817296000 | -2.948268000 | 0.348155000  |
| 6  | -2.993806000 | -4.537666000 | -0.573730000 |
| 1  | -3.485321000 | -4.813114000 | 0.376285000  |
| 6  | -2.746839000 | -5.807247000 | -1.411022000 |
| 1  | -2.121693000 | -6.519862000 | -0.844138000 |

|   |              |              |              |
|---|--------------|--------------|--------------|
| 1 | -3.702732000 | -6.320228000 | -1.617707000 |
| 6 | -2.052896000 | -5.421245000 | -2.732363000 |
| 1 | -1.862117000 | -6.329860000 | -3.329588000 |
| 6 | -2.955107000 | -4.457448000 | -3.525754000 |
| 1 | -3.913810000 | -4.948348000 | -3.770751000 |
| 1 | -2.479799000 | -4.190202000 | -4.486269000 |
| 6 | -3.197900000 | -3.187612000 | -2.689367000 |
| 1 | -3.837254000 | -2.487324000 | -3.254457000 |
| 6 | -3.890812000 | -3.564326000 | -1.363747000 |
| 1 | -4.085870000 | -2.658482000 | -0.764397000 |
| 1 | -4.870312000 | -4.029938000 | -1.571803000 |
| 6 | 0.419713000  | -2.803892000 | -1.257827000 |
| 6 | 1.675255000  | -3.484203000 | -1.214399000 |
| 1 | 1.851429000  | -4.527830000 | -1.461795000 |
| 6 | 2.625777000  | -2.561041000 | -0.824859000 |
| 1 | 3.693702000  | -2.731654000 | -0.700331000 |
| 6 | 1.945559000  | -1.318971000 | -0.652873000 |
| 6 | 2.530841000  | -0.080643000 | -0.332547000 |
| 6 | 3.980141000  | -0.113485000 | 0.046935000  |
| 6 | 4.989581000  | 0.350663000  | -0.806834000 |
| 6 | 6.334541000  | 0.341811000  | -0.424748000 |
| 6 | 6.691409000  | -0.152997000 | 0.831965000  |
| 6 | 4.367088000  | -0.611102000 | 1.297645000  |

|   |              |              |              |
|---|--------------|--------------|--------------|
| 6 | 5.705173000  | -0.633247000 | 1.697797000  |
| 9 | 6.042327000  | -1.104968000 | 2.894148000  |
| 7 | 0.576585000  | 1.412106000  | -0.691330000 |
| 6 | -0.869189000 | 3.476627000  | -1.146098000 |
| 6 | -0.496997000 | 4.580337000  | -2.183195000 |
| 1 | -0.018461000 | 4.115641000  | -3.062015000 |
| 1 | 0.242772000  | 5.269880000  | -1.746022000 |
| 6 | -1.930816000 | 2.555251000  | -1.791615000 |
| 1 | -1.491411000 | 2.046929000  | -2.667058000 |
| 1 | -2.235647000 | 1.772727000  | -1.080156000 |
| 6 | -1.511980000 | 4.193353000  | 0.081727000  |
| 1 | -0.770995000 | 4.864486000  | 0.548902000  |
| 1 | -1.781008000 | 3.443482000  | 0.837626000  |
| 6 | -2.761210000 | 4.993117000  | -0.342829000 |
| 1 | -3.197345000 | 5.477927000  | 0.548337000  |
| 6 | -2.359406000 | 6.066104000  | -1.373049000 |
| 1 | -1.637389000 | 6.770310000  | -0.921931000 |
| 1 | -3.240648000 | 6.661098000  | -1.670728000 |
| 6 | -1.742604000 | 5.381103000  | -2.608407000 |
| 1 | -1.441561000 | 6.146750000  | -3.343931000 |
| 6 | -2.777707000 | 4.433361000  | -3.240863000 |
| 1 | -3.665909000 | 5.001458000  | -3.569298000 |
| 1 | -2.354185000 | 3.954231000  | -4.141131000 |

|   |              |              |              |
|---|--------------|--------------|--------------|
| 6 | -3.177925000 | 3.360413000  | -2.211564000 |
| 1 | -3.913448000 | 2.669862000  | -2.658495000 |
| 6 | -3.792833000 | 4.036197000  | -0.969467000 |
| 1 | -4.094347000 | 3.270107000  | -0.234494000 |
| 1 | -4.707651000 | 4.588038000  | -1.248224000 |
| 6 | 0.396280000  | 2.747778000  | -0.727687000 |
| 6 | 1.607950000  | 3.413017000  | -0.356090000 |
| 1 | 1.760173000  | 4.489073000  | -0.295087000 |
| 6 | 2.550355000  | 2.438487000  | -0.112687000 |
| 1 | 3.585663000  | 2.591095000  | 0.184576000  |
| 6 | 1.913290000  | 1.181122000  | -0.343202000 |
| 6 | -4.259149000 | -0.622904000 | 3.704295000  |
| 1 | -5.268675000 | -1.049372000 | 3.838191000  |
| 6 | -4.260353000 | 0.860423000  | 4.123712000  |
| 1 | -4.573218000 | 0.959537000  | 5.178039000  |
| 1 | -4.990100000 | 1.426640000  | 3.519898000  |
| 6 | -2.847395000 | 1.444173000  | 3.933998000  |
| 1 | -2.842569000 | 2.510581000  | 4.219478000  |
| 6 | -1.841599000 | 0.671612000  | 4.805699000  |
| 1 | -0.831417000 | 1.102348000  | 4.689522000  |
| 1 | -2.111815000 | 0.771209000  | 5.871529000  |
| 6 | -1.839850000 | -0.811736000 | 4.388360000  |
| 1 | -1.119827000 | -1.370845000 | 5.009417000  |

|   |              |              |             |
|---|--------------|--------------|-------------|
| 6 | -1.422703000 | -0.929446000 | 2.908531000 |
| 1 | -0.410252000 | -0.522032000 | 2.753162000 |
| 1 | -1.396551000 | -1.988313000 | 2.601434000 |
| 6 | -2.422063000 | -0.160788000 | 1.997380000 |
| 6 | -3.852543000 | -0.737731000 | 2.220010000 |
| 1 | -4.561479000 | -0.191336000 | 1.576265000 |
| 1 | -3.872605000 | -1.792424000 | 1.896199000 |
| 6 | -3.253235000 | -1.397650000 | 4.577468000 |
| 1 | -3.550633000 | -1.334126000 | 5.639410000 |
| 1 | -3.261217000 | -2.467913000 | 4.306395000 |
| 6 | -2.434561000 | 1.333511000  | 2.454192000 |
| 1 | -1.430212000 | 1.759083000  | 2.300006000 |
| 1 | -3.137374000 | 1.891412000  | 1.815982000 |



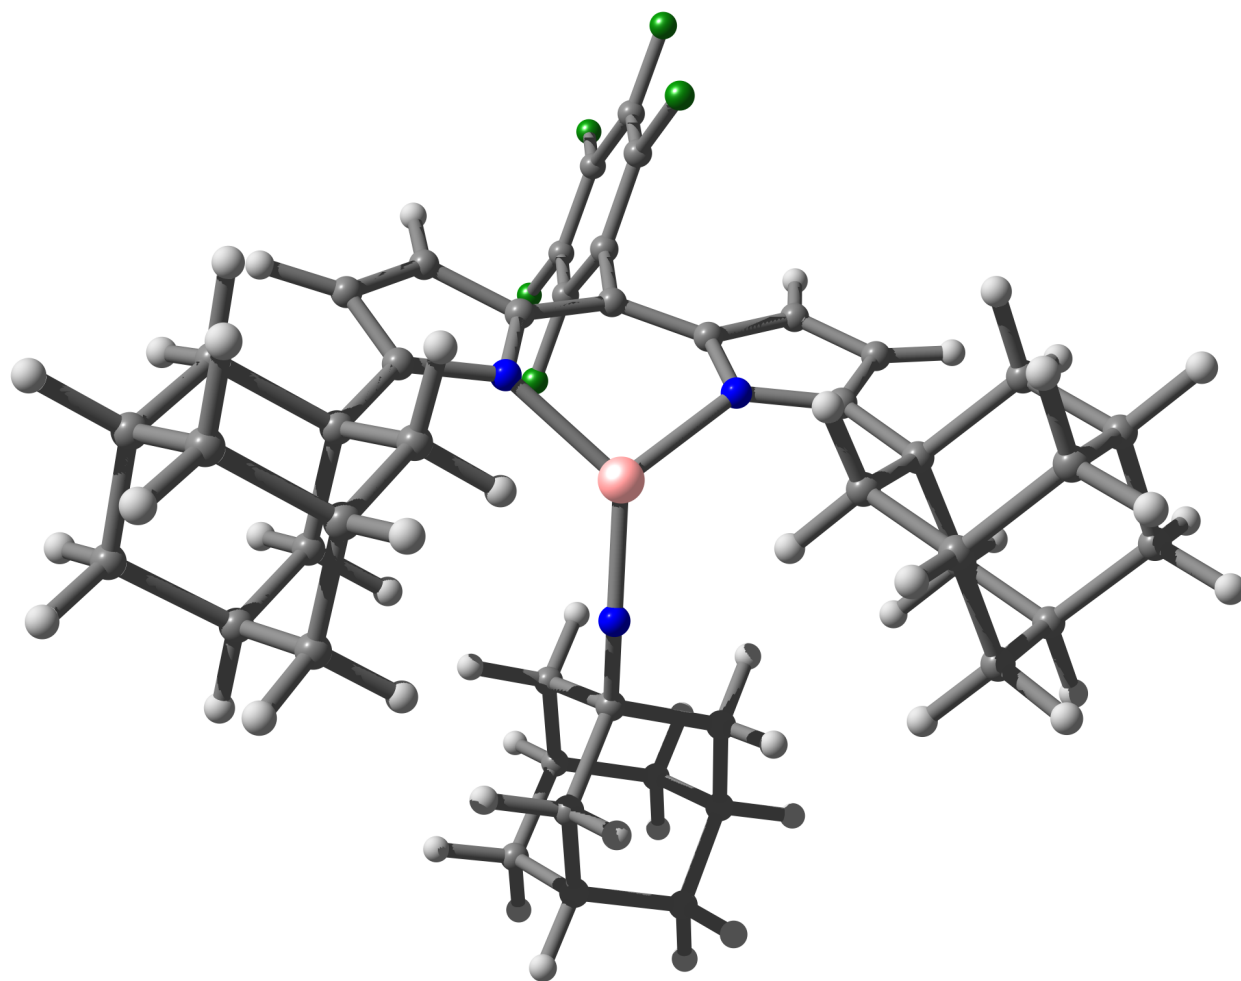

**Figure S18.** DFT optimized structure for ( $\text{Ad}^{\text{FL}}\text{L}$ )Ni(NAd) Color scheme: nickel = pink, nitrogen = blue, carbon = gray, fluorine = green, hydrogen = white.

**Optimized geometry coordinates for imide (Tr<sup>H</sup>BOX)Ni(NR)**

**doublet**

|    |              |              |              |
|----|--------------|--------------|--------------|
| 28 | -0.213037000 | -0.200247000 | 0.249093000  |
| 8  | 2.319685000  | -0.697209000 | -2.831896000 |
| 8  | -2.365748000 | -0.871062000 | -3.149285000 |
| 7  | -1.544602000 | -0.739063000 | -1.043786000 |
| 7  | 0.181645000  | 0.800376000  | 1.513581000  |
| 7  | 1.195814000  | -0.712825000 | -0.877588000 |
| 6  | -3.816764000 | -0.050394000 | -0.099801000 |
| 6  | 1.117055000  | -0.589063000 | -2.200751000 |
| 6  | -3.298708000 | 0.173054000  | 1.348050000  |
| 6  | -0.043275000 | -0.473537000 | -2.962471000 |
| 1  | 0.018286000  | -0.416103000 | -4.039758000 |
| 6  | -5.293948000 | -0.495047000 | 0.081367000  |
| 6  | 1.700617000  | -2.871404000 | 1.139607000  |
| 6  | 0.937189000  | -4.061147000 | 1.255964000  |
| 1  | 0.996848000  | -4.848069000 | 0.518781000  |
| 6  | -2.814416000 | -0.898872000 | 2.139615000  |
| 1  | -2.715029000 | -1.899733000 | 1.754628000  |
| 6  | -2.962615000 | -1.129379000 | -0.857876000 |
| 1  | -2.975140000 | -2.079198000 | -0.324378000 |
| 6  | 2.669222000  | -2.615478000 | -0.048876000 |
| 6  | 2.567544000  | -1.108380000 | -0.505450000 |
| 1  | 2.896824000  | -0.447594000 | 0.296717000  |
| 6  | 4.073507000  | -2.969407000 | 0.506647000  |
| 6  | -3.411696000 | -1.421980000 | -2.329946000 |
| 1  | -3.444324000 | -2.502147000 | -2.515883000 |
| 1  | -4.358215000 | -0.988891000 | -2.656343000 |

|   |              |              |              |
|---|--------------|--------------|--------------|
| 6 | 2.333068000  | -3.503140000 | -1.285107000 |
| 6 | -1.283757000 | -0.677977000 | -2.345238000 |
| 6 | -3.483694000 | 1.421297000  | 1.995408000  |
| 1 | -3.901868000 | 2.269120000  | 1.471312000  |
| 6 | -7.985452000 | -1.200565000 | 0.534912000  |
| 1 | -9.019008000 | -1.475630000 | 0.702882000  |
| 6 | -2.482120000 | -0.710507000 | 3.484259000  |
| 1 | -2.118139000 | -1.541271000 | 4.072737000  |
| 6 | -7.083695000 | -2.157185000 | 0.064486000  |
| 1 | -7.421298000 | -3.168273000 | -0.124172000 |
| 6 | -2.426499000 | 3.204343000  | -1.664566000 |
| 1 | -1.533030000 | 3.811044000  | -1.591486000 |
| 6 | -6.248150000 | 0.428051000  | 0.574291000  |
| 1 | -5.972168000 | 1.452293000  | 0.779396000  |
| 6 | -5.746034000 | -1.816217000 | -0.156180000 |
| 1 | -5.092719000 | -2.600859000 | -0.501067000 |
| 6 | -2.557158000 | 2.057680000  | -0.878341000 |
| 1 | -1.747636000 | 1.797459000  | -0.212702000 |
| 6 | -3.718880000 | 1.253135000  | -0.942790000 |
| 6 | 0.061414000  | -3.357220000 | 3.397468000  |
| 1 | -0.570158000 | -3.539551000 | 4.257105000  |
| 6 | 4.314476000  | -4.288522000 | 0.959987000  |
| 1 | 3.539461000  | -5.040789000 | 0.896550000  |
| 6 | 1.684837000  | -1.986962000 | 2.242704000  |
| 1 | 2.337355000  | -1.131546000 | 2.278095000  |
| 6 | -4.721237000 | 1.624580000  | -1.871119000 |
| 1 | -5.607142000 | 1.021353000  | -2.013192000 |
| 6 | -4.584495000 | 2.773493000  | -2.655252000 |

|   |              |              |              |
|---|--------------|--------------|--------------|
| 1 | -5.363797000 | 3.044449000  | -3.355850000 |
| 6 | 3.346311000  | -4.125617000 | -2.055767000 |
| 1 | 4.391947000  | -4.023372000 | -1.801276000 |
| 6 | 3.339740000  | -0.741901000 | -1.808990000 |
| 1 | 3.780634000  | 0.259021000  | -1.729009000 |
| 1 | 4.110535000  | -1.439595000 | -2.140010000 |
| 6 | 6.584650000  | -3.723977000 | 1.570084000  |
| 1 | 7.545820000  | -4.012491000 | 1.975518000  |
| 6 | 5.555379000  | -4.658755000 | 1.482786000  |
| 1 | 5.718550000  | -5.674400000 | 1.819480000  |
| 6 | 6.375011000  | -2.416980000 | 1.133886000  |
| 1 | 7.176237000  | -1.692364000 | 1.203242000  |
| 6 | -7.579996000 | 0.051981000  | 0.783481000  |
| 1 | -8.289715000 | 0.782768000  | 1.150190000  |
| 6 | 0.999282000  | -3.623477000 | -1.746257000 |
| 1 | 0.186577000  | -3.144832000 | -1.216357000 |
| 6 | -2.650017000 | 0.534236000  | 4.083534000  |
| 1 | -2.398365000 | 0.672497000  | 5.127013000  |
| 6 | -3.160634000 | 1.595735000  | 3.342480000  |
| 1 | -3.308101000 | 2.559427000  | 3.812719000  |
| 6 | 5.136184000  | -2.037333000 | 0.608754000  |
| 1 | 5.038138000  | -1.012152000 | 0.290482000  |
| 6 | 0.856426000  | -2.214866000 | 3.344161000  |
| 1 | 0.847228000  | -1.512549000 | 4.167817000  |
| 6 | 3.030207000  | -4.867848000 | -3.197046000 |
| 1 | 3.818777000  | -5.338427000 | -3.770054000 |
| 6 | 0.871355000  | 2.019009000  | 1.849463000  |
| 6 | 0.110835000  | -4.284588000 | 2.360095000  |

|   |              |              |              |
|---|--------------|--------------|--------------|
| 1 | -0.475201000 | -5.192573000 | 2.421284000  |
| 6 | -3.441610000 | 3.564975000  | -2.548685000 |
| 1 | -3.337830000 | 4.452184000  | -3.159808000 |
| 6 | 1.704947000  | -4.990928000 | -3.610632000 |
| 1 | 1.464768000  | -5.562658000 | -4.497664000 |
| 6 | 0.691250000  | -4.364731000 | -2.888725000 |
| 1 | -0.336848000 | -4.447963000 | -3.216973000 |
| 6 | 2.099383000  | 1.699585000  | 2.737176000  |
| 1 | 1.802443000  | 1.055909000  | 3.571941000  |
| 1 | 2.878809000  | 1.185318000  | 2.162961000  |
| 1 | 2.535542000  | 2.616980000  | 3.149094000  |
| 6 | -0.115730000 | 2.894865000  | 2.658606000  |
| 1 | 0.362137000  | 3.830794000  | 2.967951000  |
| 1 | -1.000914000 | 3.134747000  | 2.060209000  |
| 1 | -0.433723000 | 2.364316000  | 3.561172000  |
| 6 | 1.301002000  | 2.737339000  | 0.532924000  |
| 1 | 1.932564000  | 2.039376000  | -0.032836000 |
| 1 | 0.399597000  | 2.888930000  | -0.073793000 |
| 6 | 2.035411000  | 4.078657000  | 0.675649000  |
| 1 | 1.419422000  | 4.798153000  | 1.229755000  |
| 1 | 2.962575000  | 3.954772000  | 1.250374000  |
| 6 | 2.381147000  | 4.688136000  | -0.701515000 |
| 1 | 3.011412000  | 3.981164000  | -1.258103000 |
| 1 | 1.455414000  | 4.801952000  | -1.281692000 |
| 6 | 3.084628000  | 6.025081000  | -0.598216000 |
| 6 | 2.352621000  | 7.221530000  | -0.548186000 |
| 6 | 4.483585000  | 6.100686000  | -0.515779000 |
| 6 | 2.995679000  | 8.455401000  | -0.415271000 |

|   |             |             |              |
|---|-------------|-------------|--------------|
| 1 | 1.266915000 | 7.185940000 | -0.619982000 |
| 6 | 5.132978000 | 7.331283000 | -0.382631000 |
| 1 | 5.071093000 | 5.185245000 | -0.562054000 |
| 6 | 4.390073000 | 8.514621000 | -0.330818000 |
| 1 | 2.408249000 | 9.369938000 | -0.383058000 |
| 1 | 6.218326000 | 7.366059000 | -0.324768000 |
| 1 | 4.892814000 | 9.473281000 | -0.231128000 |

**quartet**

|    |              |              |              |
|----|--------------|--------------|--------------|
| 28 | 0.135787000  | -0.188300000 | -0.014953000 |
| 8  | 2.204723000  | 1.540627000  | -3.127275000 |
| 8  | -0.440659000 | -2.312213000 | -3.477711000 |
| 7  | -0.258234000 | -1.560449000 | -1.346967000 |
| 7  | -0.333298000 | 1.079048000  | 1.146670000  |
| 7  | 1.476769000  | 0.755602000  | -1.134408000 |
| 6  | -1.719365000 | -3.251276000 | -0.087140000 |
| 6  | 1.416687000  | 0.653849000  | -2.452113000 |
| 6  | -1.095733000 | -2.768210000 | 1.248251000  |
| 6  | 0.690696000  | -0.267756000 | -3.218662000 |
| 1  | 0.745431000  | -0.209132000 | -4.296891000 |
| 6  | -1.978679000 | -4.766001000 | 0.136052000  |
| 6  | 3.469704000  | 0.508309000  | 1.245111000  |
| 6  | 4.129122000  | -0.668243000 | 1.684689000  |
| 1  | 4.838385000  | -1.187579000 | 1.056820000  |
| 6  | 0.240405000  | -3.106017000 | 1.573329000  |
| 1  | 0.867901000  | -3.652046000 | 0.885876000  |
| 6  | -0.724278000 | -2.973246000 | -1.265989000 |
| 1  | 0.179339000  | -3.585693000 | -1.160805000 |

|   |              |              |              |
|---|--------------|--------------|--------------|
| 6 | 3.788340000  | 1.156502000  | -0.129721000 |
| 6 | 2.489683000  | 1.772404000  | -0.779752000 |
| 1 | 2.017161000  | 2.483119000  | -0.102492000 |
| 6 | 4.851721000  | 2.234380000  | 0.206865000  |
| 6 | -1.264541000 | -3.204153000 | -2.701451000 |
| 1 | -1.107184000 | -4.209119000 | -3.094982000 |
| 1 | -2.307774000 | -2.915336000 | -2.871291000 |
| 6 | 4.345823000  | 0.121926000  | -1.151846000 |
| 6 | 0.005549000  | -1.329894000 | -2.636864000 |
| 6 | -1.877935000 | -2.163016000 | 2.263237000  |
| 1 | -2.931156000 | -1.966675000 | 2.123164000  |
| 6 | -2.515605000 | -7.474649000 | 0.700741000  |
| 1 | -2.720451000 | -8.516756000 | 0.910884000  |
| 6 | 0.781392000  | -2.791742000 | 2.821235000  |
| 1 | 1.800403000  | -3.071864000 | 3.051058000  |
| 6 | -1.610963000 | -7.138270000 | -0.308557000 |
| 1 | -1.116688000 | -7.920477000 | -0.870472000 |
| 6 | -4.270993000 | -0.405546000 | -0.696971000 |
| 1 | -4.301314000 | 0.673891000  | -0.631469000 |
| 6 | -2.875560000 | -5.165601000 | 1.157046000  |
| 1 | -3.397826000 | -4.426866000 | 1.750033000  |
| 6 | -1.335863000 | -5.796787000 | -0.590996000 |
| 1 | -0.614591000 | -5.602276000 | -1.365537000 |
| 6 | -3.100356000 | -1.096222000 | -0.371605000 |
| 1 | -2.238761000 | -0.527616000 | -0.059869000 |
| 6 | -3.045630000 | -2.507687000 | -0.417558000 |
| 6 | 3.101761000  | -0.500748000 | 3.867564000  |
| 1 | 2.953690000  | -0.890710000 | 4.866205000  |

|   |              |              |              |
|---|--------------|--------------|--------------|
| 6 | 6.128201000  | 1.822493000  | 0.659395000  |
| 1 | 6.372956000  | 0.770997000  | 0.730099000  |
| 6 | 2.688272000  | 1.201605000  | 2.200678000  |
| 1 | 2.265705000  | 2.169106000  | 1.987286000  |
| 6 | -4.198970000 | -3.190433000 | -0.879681000 |
| 1 | -4.204163000 | -4.261899000 | -1.020272000 |
| 6 | -5.364732000 | -2.493234000 | -1.208599000 |
| 1 | -6.237367000 | -3.032974000 | -1.553311000 |
| 6 | 5.387645000  | 0.450770000  | -2.052779000 |
| 1 | 5.854570000  | 1.425802000  | -2.040800000 |
| 6 | 2.711449000  | 2.476778000  | -2.156789000 |
| 1 | 2.110914000  | 3.392358000  | -2.226548000 |
| 1 | 3.740420000  | 2.713308000  | -2.433268000 |
| 6 | 6.832892000  | 4.118637000  | 0.935533000  |
| 1 | 7.592130000  | 4.839875000  | 1.209088000  |
| 6 | 7.107314000  | 2.754744000  | 1.009594000  |
| 1 | 8.080551000  | 2.417173000  | 1.341821000  |
| 6 | 5.575710000  | 4.552619000  | 0.518839000  |
| 1 | 5.359944000  | 5.612526000  | 0.475879000  |
| 6 | -3.127448000 | -6.518319000 | 1.412224000  |
| 1 | -3.824948000 | -6.793518000 | 2.193208000  |
| 6 | 3.731158000  | -1.146253000 | -1.299649000 |
| 1 | 2.898162000  | -1.433452000 | -0.670423000 |
| 6 | 0.003438000  | -2.152941000 | 3.783468000  |
| 1 | 0.423408000  | -1.918634000 | 4.752939000  |
| 6 | -1.327576000 | -1.851255000 | 3.508921000  |
| 1 | -1.943758000 | -1.393987000 | 4.272211000  |
| 6 | 4.589838000  | 3.626265000  | 0.166291000  |



|   |              |              |              |
|---|--------------|--------------|--------------|
| 1 | 3.629497000  | 4.022576000  | -0.122150000 |
| 6 | 2.484840000  | 0.686457000  | 3.483435000  |
| 1 | 1.870639000  | 1.226561000  | 4.192160000  |
| 6 | 5.827199000  | -0.467030000 | -3.010735000 |
| 1 | 6.629070000  | -0.199009000 | -3.686564000 |
| 6 | -1.260396000 | 2.079389000  | 1.584648000  |
| 6 | 3.932041000  | -1.170748000 | 2.972900000  |
| 1 | 4.439270000  | -2.075164000 | 3.283279000  |
| 6 | -5.403617000 | -1.103779000 | -1.109297000 |
| 1 | -6.307971000 | -0.566784000 | -1.364789000 |
| 6 | 5.225217000  | -1.720337000 | -3.111576000 |
| 1 | 5.564726000  | -2.426048000 | -3.858623000 |
| 6 | 4.173897000  | -2.056801000 | -2.261169000 |
| 1 | 3.693289000  | -3.022439000 | -2.351687000 |
| 6 | -0.501890000 | 3.172010000  | 2.378786000  |
| 1 | -0.007616000 | 2.735016000  | 3.252642000  |
| 1 | 0.262342000  | 3.645060000  | 1.751855000  |
| 1 | -1.189271000 | 3.952029000  | 2.727355000  |
| 6 | -2.299045000 | 1.418444000  | 2.524789000  |
| 1 | -2.975664000 | 2.173568000  | 2.939221000  |
| 1 | -2.901206000 | 0.669327000  | 2.001056000  |
| 1 | -1.784009000 | 0.935621000  | 3.360693000  |
| 6 | -1.934069000 | 2.697060000  | 0.315824000  |
| 1 | -1.162717000 | 3.265698000  | -0.222399000 |
| 1 | -2.211618000 | 1.871572000  | -0.348895000 |
| 6 | -3.162987000 | 3.588902000  | 0.540221000  |
| 1 | -3.964710000 | 3.013365000  | 1.019679000  |
| 1 | -2.928811000 | 4.421366000  | 1.217381000  |

|   |              |             |              |
|---|--------------|-------------|--------------|
| 6 | -3.701993000 | 4.160586000 | -0.789972000 |
| 1 | -2.928985000 | 4.790254000 | -1.250725000 |
| 1 | -3.880705000 | 3.328536000 | -1.484629000 |
| 6 | -4.977511000 | 4.957844000 | -0.617421000 |
| 6 | -6.229506000 | 4.324418000 | -0.658973000 |
| 6 | -4.941573000 | 6.339975000 | -0.378113000 |
| 6 | -7.409788000 | 5.046794000 | -0.463521000 |
| 1 | -6.279387000 | 3.254095000 | -0.852520000 |
| 6 | -6.118523000 | 7.068428000 | -0.181891000 |
| 1 | -3.981315000 | 6.852187000 | -0.351056000 |
| 6 | -7.358200000 | 6.423365000 | -0.223005000 |
| 1 | -8.368985000 | 4.536144000 | -0.504645000 |
| 1 | -6.067174000 | 8.139692000 | -0.002284000 |
| 1 | -8.274988000 | 6.988334000 | -0.074600000 |

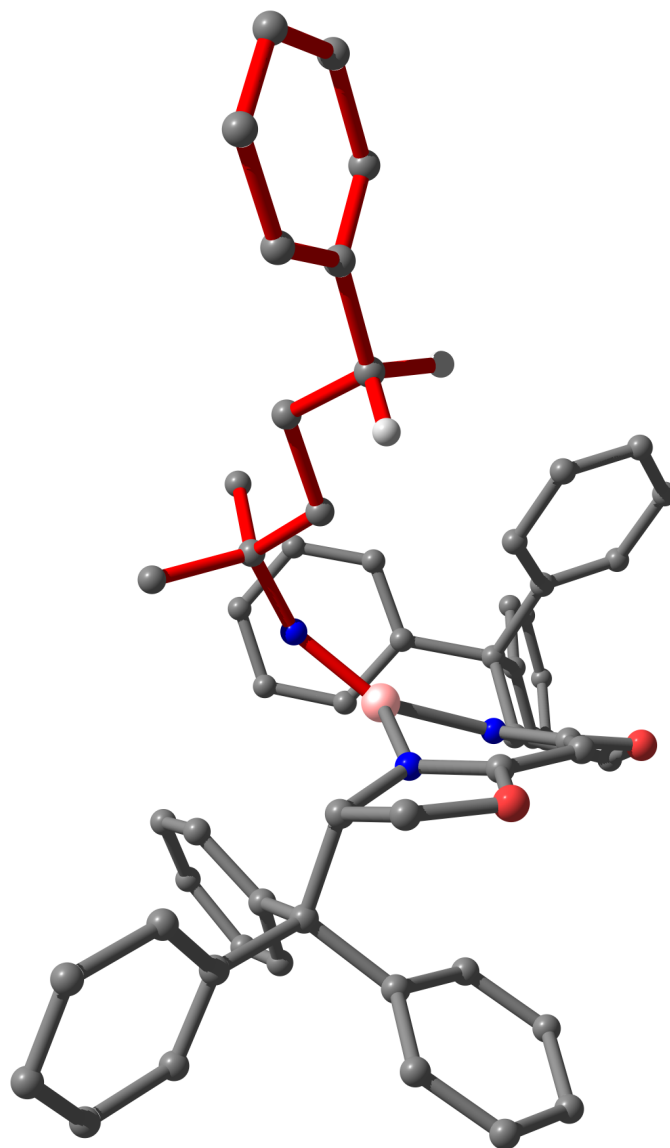

**Figure S19.** DFT optimized structure for imide ( $^{Ad^F}L$ )Ni(NR) Color scheme: nickel = pink, nitrogen = blue, carbon = gray, fluorine = green, hydrogen = white. The fragment corresponding to the substrate **9** is labeled in red.

**Optimized geometry coordinates for amide (<sup>TrH</sup>BOX)Ni(NHR)**

**doublet**

|    |              |              |              |
|----|--------------|--------------|--------------|
| 28 | -0.335076000 | -0.240486000 | 0.336737000  |
| 8  | 2.432327000  | -0.264157000 | -2.700857000 |
| 8  | -2.208545000 | -0.047048000 | -3.294518000 |
| 7  | -1.583599000 | -0.443965000 | -1.151125000 |
| 7  | 0.009313000  | 0.616100000  | 1.914496000  |
| 7  | 1.241184000  | -0.506792000 | -0.795109000 |
| 6  | -3.897186000 | 0.155986000  | -0.244828000 |
| 6  | 1.219378000  | -0.191482000 | -2.081438000 |
| 6  | -3.462857000 | -0.000626000 | 1.238172000  |
| 6  | 0.098405000  | 0.111772000  | -2.862096000 |
| 1  | 0.231944000  | 0.352862000  | -3.907462000 |
| 6  | -5.397459000 | -0.241260000 | -0.248116000 |
| 6  | 1.643971000  | -2.841477000 | 1.054841000  |
| 6  | 0.792094000  | -3.975002000 | 1.070135000  |
| 1  | 0.777010000  | -4.684854000 | 0.256670000  |
| 6  | -3.208210000 | -1.281215000 | 1.789396000  |
| 1  | -3.241865000 | -2.176691000 | 1.190449000  |
| 6  | -3.032115000 | -0.763587000 | -1.179963000 |
| 1  | -3.139981000 | -1.810887000 | -0.894851000 |
| 6  | 2.609753000  | -2.537255000 | -0.124346000 |
| 6  | 2.587893000  | -0.994089000 | -0.441644000 |
| 1  | 2.927411000  | -0.426311000 | 0.426442000  |
| 6  | 3.994925000  | -3.021649000 | 0.376203000  |
| 6  | -3.365037000 | -0.661983000 | -2.707848000 |
| 1  | -3.471919000 | -1.660241000 | -3.148835000 |
| 1  | -4.238875000 | -0.069468000 | -2.984655000 |

|   |              |              |              |
|---|--------------|--------------|--------------|
| 6 | 2.208941000  | -3.282569000 | -1.433415000 |
| 6 | -1.193976000 | -0.119252000 | -2.384810000 |
| 6 | -3.522461000 | 1.091134000  | 2.141373000  |
| 1 | -3.798826000 | 2.082042000  | 1.810161000  |
| 6 | -8.138144000 | -0.880853000 | -0.108279000 |
| 1 | -9.190881000 | -1.129138000 | -0.061359000 |
| 6 | -2.956190000 | -1.444352000 | 3.154070000  |
| 1 | -2.768266000 | -2.432093000 | 3.553091000  |
| 6 | -7.262648000 | -1.713181000 | -0.809155000 |
| 1 | -7.640130000 | -2.603095000 | -1.296402000 |
| 6 | -2.279310000 | 3.592275000  | -0.986506000 |
| 1 | -1.351948000 | 4.105000000  | -0.765448000 |
| 6 | -6.326968000 | 0.556618000  | 0.461912000  |
| 1 | -6.006357000 | 1.456421000  | 0.968696000  |
| 6 | -5.900595000 | -1.405490000 | -0.877500000 |
| 1 | -5.269732000 | -2.093723000 | -1.415710000 |
| 6 | -2.495944000 | 2.301946000  | -0.498917000 |
| 1 | -1.719329000 | 1.839369000  | 0.090495000  |
| 6 | -3.703589000 | 1.612901000  | -0.755898000 |
| 6 | 0.016002000  | -3.431668000 | 3.296322000  |
| 1 | -0.610647000 | -3.652539000 | 4.150504000  |
| 6 | 4.165691000  | -4.392484000 | 0.684112000  |
| 1 | 3.350467000  | -5.090798000 | 0.546262000  |
| 6 | 1.718979000  | -2.076898000 | 2.243143000  |
| 1 | 2.435506000  | -1.278813000 | 2.348285000  |
| 6 | -4.662532000 | 2.258904000  | -1.573888000 |
| 1 | -5.579048000 | 1.765178000  | -1.865156000 |
| 6 | -4.439842000 | 3.550406000  | -2.060028000 |

|   |              |              |              |
|---|--------------|--------------|--------------|
| 1 | -5.186613000 | 4.029854000  | -2.679747000 |
| 6 | 3.175961000  | -3.886870000 | -2.274737000 |
| 1 | 4.227879000  | -3.873222000 | -2.026144000 |
| 6 | 3.419763000  | -0.541468000 | -1.684410000 |
| 1 | 3.957829000  | 0.390601000  | -1.475792000 |
| 1 | 4.124325000  | -1.266322000 | -2.096075000 |
| 6 | 6.461874000  | -4.015644000 | 1.339957000  |
| 1 | 7.406701000  | -4.395829000 | 1.706317000  |
| 6 | 5.385769000  | -4.881288000 | 1.156020000  |
| 1 | 5.495909000  | -5.934653000 | 1.379169000  |
| 6 | 6.318986000  | -2.658863000 | 1.054371000  |
| 1 | 7.155049000  | -1.987491000 | 1.202972000  |
| 6 | -7.684238000 | 0.218374000  | 0.509241000  |
| 1 | -8.373957000 | 0.852884000  | 1.051337000  |
| 6 | 0.867291000  | -3.273548000 | -1.888030000 |
| 1 | 0.089236000  | -2.800128000 | -1.304481000 |
| 6 | -2.981416000 | -0.346404000 | 4.009929000  |
| 1 | -2.793400000 | -0.478426000 | 5.067496000  |
| 6 | -3.275417000 | 0.917558000  | 3.505422000  |
| 1 | -3.326095000 | 1.766187000  | 4.175287000  |
| 6 | 5.101330000  | -2.160741000 | 0.581282000  |
| 1 | 5.051467000  | -1.101373000 | 0.388682000  |
| 6 | 0.898131000  | -2.355446000 | 3.338623000  |
| 1 | 0.960854000  | -1.744460000 | 4.229914000  |
| 6 | 2.806322000  | -4.493067000 | -3.478599000 |
| 1 | 3.560092000  | -4.952556000 | -4.104961000 |
| 6 | 0.673986000  | 1.875055000  | 2.286255000  |
| 6 | -0.028784000 | -4.246896000 | 2.168011000  |

|   |              |              |              |
|---|--------------|--------------|--------------|
| 1 | -0.684009000 | -5.108304000 | 2.152286000  |
| 6 | -3.252912000 | 4.218444000  | -1.762183000 |
| 1 | -3.082851000 | 5.217329000  | -2.142555000 |
| 6 | 1.473279000  | -4.493042000 | -3.885282000 |
| 1 | 1.191850000  | -4.959109000 | -4.820678000 |
| 6 | 0.505795000  | -3.878790000 | -3.093224000 |
| 1 | -0.527607000 | -3.865305000 | -3.415129000 |
| 6 | 1.736277000  | 1.586063000  | 3.374169000  |
| 1 | 1.290421000  | 1.014403000  | 4.197715000  |
| 1 | 2.565974000  | 0.998531000  | 2.966641000  |
| 1 | 2.148300000  | 2.510302000  | 3.797883000  |
| 6 | -0.367266000 | 2.859619000  | 2.867409000  |
| 1 | 0.091280000  | 3.806682000  | 3.175927000  |
| 1 | -1.152322000 | 3.079403000  | 2.136072000  |
| 1 | -0.840633000 | 2.426785000  | 3.757782000  |
| 6 | 1.334558000  | 2.454962000  | 1.014946000  |
| 1 | 2.001356000  | 1.687606000  | 0.604768000  |
| 1 | 0.551995000  | 2.608965000  | 0.261314000  |
| 6 | 2.128095000  | 3.762528000  | 1.169687000  |
| 1 | 1.484165000  | 4.547246000  | 1.601009000  |
| 1 | 2.945627000  | 3.626480000  | 1.893940000  |
| 6 | 2.682127000  | 4.237233000  | -0.142806000 |
| 1 | 2.328277000  | 3.738541000  | -1.044397000 |
| 1 | -0.516856000 | 0.278904000  | 2.722233000  |
| 6 | 3.596493000  | 5.307265000  | -0.309439000 |
| 6 | 4.110110000  | 6.063358000  | 0.786754000  |
| 6 | 4.041422000  | 5.674504000  | -1.615849000 |
| 6 | 5.006167000  | 7.106573000  | 0.582029000  |

|   |             |             |              |
|---|-------------|-------------|--------------|
| 1 | 3.794135000 | 5.821453000 | 1.797472000  |
| 6 | 4.936389000 | 6.717489000 | -1.808950000 |
| 1 | 3.663881000 | 5.117422000 | -2.470753000 |
| 6 | 5.428924000 | 7.444318000 | -0.712371000 |
| 1 | 5.381005000 | 7.666274000 | 1.435952000  |
| 1 | 5.256539000 | 6.972889000 | -2.816350000 |
| 1 | 6.129340000 | 8.260972000 | -0.865142000 |

**quartet**

|    |              |              |              |
|----|--------------|--------------|--------------|
| 28 | -0.335147000 | -0.240515000 | 0.336818000  |
| 8  | 2.432450000  | -0.263811000 | -2.700615000 |
| 8  | -2.208417000 | -0.046936000 | -3.294472000 |
| 7  | -1.583522000 | -0.443936000 | -1.151078000 |
| 7  | 0.009027000  | 0.616066000  | 1.914603000  |
| 7  | 1.241266000  | -0.506658000 | -0.794928000 |
| 6  | -3.897165000 | 0.155840000  | -0.244821000 |
| 6  | 1.219470000  | -0.191247000 | -2.081227000 |
| 6  | -3.462911000 | -0.000898000 | 1.238199000  |
| 6  | 0.098519000  | 0.112009000  | -2.861926000 |
| 1  | 0.232116000  | 0.353187000  | -3.907264000 |
| 6  | -5.397445000 | -0.241405000 | -0.248236000 |
| 6  | 1.643976000  | -2.841583000 | 1.054637000  |
| 6  | 0.792174000  | -3.975166000 | 1.069669000  |
| 1  | 0.777274000  | -4.684927000 | 0.256121000  |
| 6  | -3.208411000 | -1.281544000 | 1.789366000  |
| 1  | -3.242150000 | -2.176987000 | 1.190375000  |
| 6  | -3.032017000 | -0.763642000 | -1.179982000 |
| 1  | -3.139842000 | -1.810963000 | -0.894932000 |



|   |              |              |              |
|---|--------------|--------------|--------------|
| 6 | 2.609901000  | -2.537150000 | -0.124377000 |
| 6 | 2.587973000  | -0.993941000 | -0.441472000 |
| 1 | 2.927416000  | -0.426268000 | 0.426713000  |
| 6 | 3.995054000  | -3.021497000 | 0.376280000  |
| 6 | -3.364879000 | -0.662004000 | -2.707879000 |
| 1 | -3.471637000 | -1.660256000 | -3.148908000 |
| 1 | -4.238764000 | -0.069569000 | -2.984705000 |
| 6 | 2.209309000  | -3.282344000 | -1.433582000 |
| 6 | -1.193873000 | -0.119132000 | -2.384738000 |
| 6 | -3.522434000 | 1.090809000  | 2.141476000  |
| 1 | -3.798707000 | 2.081768000  | 1.810333000  |
| 6 | -8.138148000 | -0.881003000 | -0.108633000 |
| 1 | -9.190889000 | -1.129288000 | -0.061804000 |
| 6 | -2.956420000 | -1.444787000 | 3.154033000  |
| 1 | -2.768591000 | -2.432570000 | 3.552996000  |
| 6 | -7.262595000 | -1.713313000 | -0.809460000 |
| 1 | -7.640038000 | -2.603214000 | -1.296758000 |
| 6 | -2.279233000 | 3.592177000  | -0.986149000 |
| 1 | -1.351897000 | 4.104893000  | -0.764945000 |
| 6 | -6.327016000 | 0.556453000  | 0.461735000  |
| 1 | -6.006452000 | 1.456247000  | 0.968568000  |
| 6 | -5.900537000 | -1.405620000 | -0.877688000 |
| 1 | -5.269640000 | -2.093841000 | -1.415875000 |
| 6 | -2.495921000 | 2.301824000  | -0.498652000 |
| 1 | -1.719388000 | 1.839226000  | 0.090838000  |
| 6 | -3.703532000 | 1.612789000  | -0.755793000 |
| 6 | 0.015666000  | -3.432113000 | 3.295780000  |
| 1 | -0.611115000 | -3.653111000 | 4.149832000  |

|   |              |              |              |
|---|--------------|--------------|--------------|
| 6 | 4.165870000  | -4.392344000 | 0.684109000  |
| 1 | 3.350693000  | -5.090693000 | 0.546155000  |
| 6 | 1.718747000  | -2.077135000 | 2.243037000  |
| 1 | 2.435219000  | -1.279031000 | 2.348383000  |
| 6 | -4.662379000 | 2.258819000  | -1.573873000 |
| 1 | -5.578857000 | 1.765100000  | -1.865272000 |
| 6 | -4.439638000 | 3.550345000  | -2.059933000 |
| 1 | -5.186337000 | 4.029816000  | -2.679721000 |
| 6 | 3.176474000  | -3.886500000 | -2.274845000 |
| 1 | 4.228360000  | -3.872811000 | -2.026124000 |
| 6 | 3.419869000  | -0.541114000 | -1.684141000 |
| 1 | 3.957821000  | 0.390994000  | -1.475407000 |
| 1 | 4.124530000  | -1.265855000 | -2.095832000 |
| 6 | 6.461987000  | -4.015431000 | 1.340138000  |
| 1 | 7.406809000  | -4.395591000 | 1.706539000  |
| 6 | 5.385938000  | -4.881117000 | 1.156075000  |
| 1 | 5.496115000  | -5.934490000 | 1.379168000  |
| 6 | 6.319056000  | -2.658641000 | 1.054612000  |
| 1 | 7.155081000  | -1.987240000 | 1.203296000  |
| 6 | -7.684290000 | 0.218210000  | 0.508947000  |
| 1 | -8.374052000 | 0.852711000  | 1.050999000  |
| 6 | 0.867718000  | -3.273354000 | -1.888368000 |
| 1 | 0.089558000  | -2.800046000 | -1.304865000 |
| 6 | -2.981536000 | -0.346887000 | 4.009955000  |
| 1 | -2.793537000 | -0.478986000 | 5.067516000  |
| 6 | -3.275409000 | 0.917133000  | 3.505514000  |
| 1 | -3.325998000 | 1.765732000  | 4.175424000  |
| 6 | 5.101409000  | -2.160551000 | 0.581467000  |

|   |              |              |              |
|---|--------------|--------------|--------------|
| 1 | 5.051522000  | -1.101179000 | 0.388898000  |
| 6 | 0.897731000  | -2.355850000 | 3.338349000  |
| 1 | 0.960272000  | -1.744961000 | 4.229719000  |
| 6 | 2.807022000  | -4.492597000 | -3.478815000 |
| 1 | 3.560898000  | -4.951976000 | -4.105129000 |
| 6 | 0.673834000  | 1.874959000  | 2.286352000  |
| 6 | -0.028879000 | -4.247225000 | 2.167374000  |
| 1 | -0.684050000 | -5.108670000 | 2.151447000  |
| 6 | -3.252744000 | 4.218377000  | -1.761916000 |
| 1 | -3.082644000 | 5.217282000  | -2.142219000 |
| 6 | 1.474030000  | -4.492610000 | -3.885665000 |
| 1 | 1.192746000  | -4.958602000 | -4.821143000 |
| 6 | 0.506409000  | -3.878497000 | -3.093668000 |
| 1 | -0.526954000 | -3.865044000 | -3.415701000 |
| 6 | 1.736368000  | 1.585865000  | 3.373996000  |
| 1 | 1.290759000  | 1.014008000  | 4.197534000  |
| 1 | 2.566059000  | 0.998514000  | 2.966194000  |
| 1 | 2.148373000  | 2.510078000  | 3.797792000  |
| 6 | -0.367326000 | 2.859441000  | 2.867816000  |
| 1 | 0.091251000  | 3.806477000  | 3.176373000  |
| 1 | -1.152500000 | 3.079279000  | 2.136624000  |
| 1 | -0.840549000 | 2.426484000  | 3.758213000  |
| 6 | 1.334170000  | 2.455042000  | 1.014984000  |
| 1 | 2.000850000  | 1.687718000  | 0.604550000  |
| 1 | 0.551506000  | 2.609239000  | 0.261498000  |
| 6 | 2.127781000  | 3.762553000  | 1.169821000  |
| 1 | 1.483912000  | 4.547179000  | 1.601428000  |
| 1 | 2.945447000  | 3.626371000  | 1.893882000  |

|   |              |             |              |
|---|--------------|-------------|--------------|
| 6 | 2.681495000  | 4.237553000 | -0.142706000 |
| 1 | 2.327118000  | 3.739299000 | -1.044330000 |
| 1 | -0.517175000 | 0.278965000 | 2.722349000  |
| 6 | 3.595975000  | 5.307493000 | -0.309318000 |
| 6 | 4.110351000  | 6.062974000 | 0.786957000  |
| 6 | 4.040279000  | 5.675258000 | -1.615788000 |
| 6 | 5.006493000  | 7.106114000 | 0.582242000  |
| 1 | 3.794879000  | 5.820654000 | 1.797724000  |
| 6 | 4.935332000  | 6.718164000 | -1.808878000 |
| 1 | 3.662171000  | 5.118641000 | -2.470747000 |
| 6 | 5.428603000  | 7.444388000 | -0.712232000 |
| 1 | 5.381899000  | 7.665350000 | 1.436219000  |
| 1 | 5.254999000  | 6.973969000 | -2.816330000 |
| 1 | 6.129098000  | 8.260973000 | -0.865007000 |

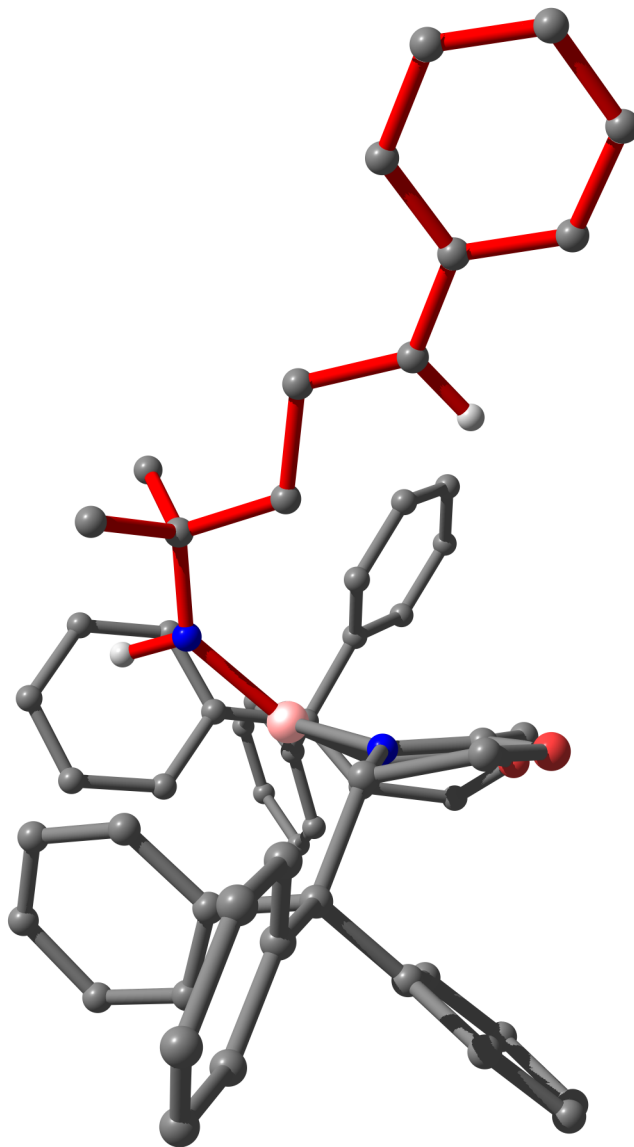

**Figure S20. DFT optimized structure for amide (<sup>AdF</sup>L)Ni(NHR)** Color scheme: nickel = pink, nitrogen = blue, carbon = gray, fluorine = green, hydrogen = white. The fragment corresponding to the substrate **9** is labeled in red.

**Optimized geometry coordinates for product adduct (<sup>TrH</sup>BOX)Ni(pyrrolidine)**

**S-pyrrolidine adduct**

|    |              |              |              |
|----|--------------|--------------|--------------|
| 28 | -0.126937000 | 0.428193000  | -0.762032000 |
| 8  | 2.288094000  | -2.250093000 | -2.715893000 |
| 8  | -1.887155000 | -3.291282000 | -0.962126000 |
| 7  | -1.208852000 | -1.200446000 | -0.393844000 |
| 7  | 0.040058000  | 2.399774000  | -1.525829000 |
| 7  | 1.434077000  | -0.706198000 | -1.296534000 |
| 6  | -3.544549000 | -0.711311000 | 0.547408000  |
| 6  | 1.179458000  | -1.751541000 | -2.063163000 |
| 6  | -3.220072000 | 0.798047000  | 0.704860000  |
| 6  | -0.029145000 | -2.450517000 | -2.166094000 |
| 1  | -0.072195000 | -3.346748000 | -2.769847000 |
| 6  | -4.515575000 | -1.020449000 | 1.717960000  |
| 6  | 2.533940000  | -0.634127000 | 1.398094000  |
| 6  | 2.305258000  | -1.408313000 | 2.565268000  |
| 1  | 2.749644000  | -2.386296000 | 2.687537000  |
| 6  | -2.380736000 | 1.240196000  | 1.756047000  |
| 1  | -1.897959000 | 0.542734000  | 2.422541000  |
| 6  | -2.223897000 | -1.564233000 | 0.624764000  |
| 1  | -1.754326000 | -1.444605000 | 1.603536000  |
| 6  | 3.433158000  | -1.143307000 | 0.231175000  |
| 6  | 2.892075000  | -0.586927000 | -1.154263000 |
| 1  | 3.138045000  | 0.476323000  | -1.242408000 |
| 6  | 4.867318000  | -0.624377000 | 0.535675000  |
| 6  | -2.415899000 | -3.092038000 | 0.356018000  |
| 1  | -1.809017000 | -3.681429000 | 1.056445000  |
| 1  | -3.437834000 | -3.476976000 | 0.375342000  |

|   |              |              |              |
|---|--------------|--------------|--------------|
| 6 | 3.427394000  | -2.698344000 | 0.170824000  |
| 6 | -1.018252000 | -2.246788000 | -1.185000000 |
| 6 | -3.910178000 | 1.791534000  | -0.035212000 |
| 1 | -4.643809000 | 1.532753000  | -0.784574000 |
| 6 | -6.359001000 | -1.437035000 | 3.807128000  |
| 1 | -7.064802000 | -1.602994000 | 4.611118000  |
| 6 | -2.199490000 | 2.601587000  | 2.012508000  |
| 1 | -1.561315000 | 2.918158000  | 2.827220000  |
| 6 | -5.139577000 | -2.118154000 | 3.806870000  |
| 1 | -4.906408000 | -2.804713000 | 4.610680000  |
| 6 | -4.194174000 | -0.855331000 | -3.263639000 |
| 1 | -3.748569000 | -0.455729000 | -4.165553000 |
| 6 | -5.761645000 | -0.350653000 | 1.773775000  |
| 1 | -6.048040000 | 0.342913000  | 0.994507000  |
| 6 | -4.218234000 | -1.913833000 | 2.775395000  |
| 1 | -3.290477000 | -2.459500000 | 2.832340000  |
| 6 | -3.646969000 | -0.540859000 | -2.018458000 |
| 1 | -2.781484000 | 0.100300000  | -1.984140000 |
| 6 | -4.213311000 | -1.031790000 | -0.820982000 |
| 6 | 0.941810000  | 0.341333000  | 3.529219000  |
| 1 | 0.323957000  | 0.712252000  | 4.336721000  |
| 6 | 5.468821000  | -0.935682000 | 1.779617000  |
| 1 | 4.954570000  | -1.542998000 | 2.508484000  |
| 6 | 1.984335000  | 0.664601000  | 1.371776000  |
| 1 | 2.159712000  | 1.315152000  | 0.538169000  |
| 6 | -5.326519000 | -1.901079000 | -0.934557000 |
| 1 | -5.769171000 | -2.369012000 | -0.066625000 |
| 6 | -5.870826000 | -2.213069000 | -2.183788000 |

|   |              |              |              |
|---|--------------|--------------|--------------|
| 1 | -6.724056000 | -2.875780000 | -2.250331000 |
| 6 | 4.605584000  | -3.441934000 | -0.086012000 |
| 1 | 5.557860000  | -2.954195000 | -0.240920000 |
| 6 | 3.370279000  | -1.336721000 | -2.430174000 |
| 1 | 3.459958000  | -0.635256000 | -3.271127000 |
| 1 | 4.292285000  | -1.917196000 | -2.361603000 |
| 6 | 7.480636000  | 0.262629000  | 1.178303000  |
| 1 | 8.477354000  | 0.604797000  | 1.425183000  |
| 6 | 6.753912000  | -0.490116000 | 2.096881000  |
| 1 | 7.189721000  | -0.737128000 | 3.056412000  |
| 6 | 6.929312000  | 0.558538000  | -0.065989000 |
| 1 | 7.503814000  | 1.126411000  | -0.786662000 |
| 6 | -6.660202000 | -0.579900000 | 2.821967000  |
| 1 | -7.609025000 | -0.058639000 | 2.835403000  |
| 6 | 2.215227000  | -3.418526000 | 0.294779000  |
| 1 | 1.283430000  | -2.901572000 | 0.479272000  |
| 6 | -2.865270000 | 3.554645000  | 1.246183000  |
| 1 | -2.736239000 | 4.607896000  | 1.458635000  |
| 6 | -3.715023000 | 3.150410000  | 0.220903000  |
| 1 | -4.249371000 | 3.891582000  | -0.359320000 |
| 6 | 5.644214000  | 0.116070000  | -0.392831000 |
| 1 | 5.295551000  | 0.349292000  | -1.385676000 |
| 6 | 1.190427000  | 1.141118000  | 2.417306000  |
| 1 | 0.771380000  | 2.136165000  | 2.366344000  |
| 6 | 4.570094000  | -4.835911000 | -0.181010000 |
| 1 | 5.480990000  | -5.386634000 | -0.377435000 |
| 6 | -0.386151000 | 2.491282000  | -3.006915000 |
| 6 | 1.505457000  | -0.929777000 | 3.606564000  |



|   |              |              |              |
|---|--------------|--------------|--------------|
| 1 | 1.331730000  | -1.544060000 | 4.480623000  |
| 6 | -5.309158000 | -1.686934000 | -3.346265000 |
| 1 | -5.731244000 | -1.933199000 | -4.311963000 |
| 6 | 3.363868000  | -5.519677000 | -0.037146000 |
| 1 | 3.340056000  | -6.598944000 | -0.114614000 |
| 6 | 2.187205000  | -4.811052000 | 0.197165000  |
| 1 | 1.248840000  | -5.340430000 | 0.301442000  |
| 6 | -1.832262000 | 3.007226000  | -3.064745000 |
| 1 | -2.508834000 | 2.362413000  | -2.495016000 |
| 1 | -1.913342000 | 4.027119000  | -2.665583000 |
| 1 | -2.189991000 | 3.023949000  | -4.100139000 |
| 6 | -0.261273000 | 1.143533000  | -3.724652000 |
| 1 | -0.475098000 | 1.285852000  | -4.792591000 |
| 1 | 0.752152000  | 0.743881000  | -3.629702000 |
| 1 | -0.945398000 | 0.386221000  | -3.335483000 |
| 6 | 0.592774000  | 3.515933000  | -3.647819000 |
| 1 | 1.414814000  | 2.983276000  | -4.142169000 |
| 1 | 0.093278000  | 4.122133000  | -4.411610000 |
| 6 | 1.131500000  | 4.337555000  | -2.482978000 |
| 1 | 2.091201000  | 4.822813000  | -2.691913000 |
| 1 | 0.425256000  | 5.124167000  | -2.187648000 |
| 6 | 1.250838000  | 3.294727000  | -1.354075000 |
| 1 | 2.130990000  | 2.670719000  | -1.542047000 |
| 1 | -0.708983000 | 2.842996000  | -0.990982000 |
| 6 | 1.390747000  | 3.941917000  | 0.010069000  |
| 6 | 2.626871000  | 3.937356000  | 0.672713000  |
| 6 | 0.329091000  | 4.645425000  | 0.596741000  |
| 6 | 2.785493000  | 4.575313000  | 1.905831000  |

|   |              |             |             |
|---|--------------|-------------|-------------|
| 1 | 3.471080000  | 3.414346000 | 0.227798000 |
| 6 | 0.477250000  | 5.277633000 | 1.832673000 |
| 1 | -0.623504000 | 4.721225000 | 0.077358000 |
| 6 | 1.707057000  | 5.238445000 | 2.496338000 |
| 1 | 3.749685000  | 4.545792000 | 2.406700000 |
| 1 | -0.365547000 | 5.803572000 | 2.273753000 |
| 1 | 1.824325000  | 5.726009000 | 3.460444000 |

**R-pyrrolidine adduct**

|    |              |              |              |
|----|--------------|--------------|--------------|
| 28 | 0.145977000  | 0.732240000  | 0.569625000  |
| 8  | -2.187125000 | -1.411935000 | 3.146100000  |
| 8  | 2.098265000  | -2.624716000 | 1.980759000  |
| 7  | 1.334805000  | -0.878960000 | 0.745342000  |
| 7  | 0.287277000  | 2.862170000  | 0.472069000  |
| 7  | -1.362815000 | -0.309333000 | 1.346632000  |
| 6  | 3.609780000  | -0.684661000 | -0.430162000 |
| 6  | -1.081049000 | -1.020139000 | 2.425905000  |
| 6  | 3.197109000  | 0.680370000  | -1.041327000 |
| 6  | 0.169432000  | -1.522405000 | 2.815629000  |
| 1  | 0.227493000  | -2.165751000 | 3.683064000  |
| 6  | 4.513805000  | -1.340697000 | -1.509986000 |
| 6  | -2.355042000 | -1.032231000 | -1.331450000 |
| 6  | -1.806936000 | -2.027428000 | -2.180749000 |
| 1  | -1.969683000 | -3.079671000 | -2.000401000 |
| 6  | 2.249908000  | 0.735633000  | -2.092121000 |
| 1  | 1.748078000  | -0.152156000 | -2.443104000 |
| 6  | 2.332081000  | -1.550215000 | -0.121865000 |
| 1  | 1.821349000  | -1.806462000 | -1.053674000 |

|   |              |              |              |
|---|--------------|--------------|--------------|
| 6 | -3.203583000 | -1.373213000 | -0.072971000 |
| 6 | -2.813873000 | -0.390206000 | 1.106404000  |
| 1 | -3.159325000 | 0.615390000  | 0.868569000  |
| 6 | -4.678306000 | -1.188475000 | -0.520361000 |
| 6 | 2.611596000  | -2.874542000 | 0.665247000  |
| 1 | 2.038425000  | -3.704788000 | 0.231462000  |
| 1 | 3.654389000  | -3.186731000 | 0.758130000  |
| 6 | -2.969232000 | -2.834137000 | 0.413917000  |
| 6 | 1.181331000  | -1.605639000 | 1.841451000  |
| 6 | 3.893105000  | 1.875924000  | -0.730823000 |
| 1 | 4.690814000  | 1.891960000  | -0.002107000 |
| 6 | 6.229046000  | -2.385015000 | -3.487544000 |
| 1 | 6.885235000  | -2.791721000 | -4.246562000 |
| 6 | 1.968382000  | 1.936488000  | -2.749653000 |
| 1 | 1.237803000  | 1.957905000  | -3.547429000 |
| 6 | 5.075995000  | -3.084229000 | -3.124485000 |
| 1 | 4.844580000  | -4.026545000 | -3.604442000 |
| 6 | 4.489328000  | 0.427339000  | 3.169361000  |
| 1 | 4.055213000  | 1.049712000  | 3.941278000  |
| 6 | 5.694185000  | -0.673932000 | -1.919987000 |
| 1 | 5.982604000  | 0.264086000  | -1.465656000 |
| 6 | 4.219485000  | -2.571778000 | -2.145564000 |
| 1 | 3.344574000  | -3.154927000 | -1.909673000 |
| 6 | 3.836150000  | 0.280484000  | 1.944238000  |
| 1 | 2.896457000  | 0.789352000  | 1.802537000  |
| 6 | 4.382884000  | -0.512222000 | 0.909873000  |
| 6 | -0.901225000 | -0.342801000 | -3.661734000 |
| 1 | -0.333156000 | -0.077192000 | -4.543806000 |

|   |              |              |              |
|---|--------------|--------------|--------------|
| 6 | -5.156141000 | -1.935938000 | -1.623327000 |
| 1 | -4.511337000 | -2.641190000 | -2.130122000 |
| 6 | -2.233761000 | 0.309324000  | -1.753347000 |
| 1 | -2.737392000 | 1.095668000  | -1.222900000 |
| 6 | 5.590526000  | -1.200950000 | 1.185799000  |
| 1 | 6.031300000  | -1.881679000 | 0.471868000  |
| 6 | 6.239878000  | -1.050530000 | 2.414509000  |
| 1 | 7.164074000  | -1.580877000 | 2.604897000  |
| 6 | -4.037544000 | -3.658238000 | 0.847618000  |
| 1 | -5.060308000 | -3.308337000 | 0.838714000  |
| 6 | -3.326730000 | -0.784364000 | 2.521559000  |
| 1 | -3.582115000 | 0.114147000  | 3.100468000  |
| 1 | -4.164837000 | -1.482237000 | 2.575656000  |
| 6 | -7.338385000 | -0.910433000 | -1.445192000 |
| 1 | -8.354950000 | -0.801675000 | -1.800437000 |
| 6 | -6.468499000 | -1.794539000 | -2.079565000 |
| 1 | -6.811439000 | -2.374624000 | -2.926566000 |
| 6 | -6.900485000 | -0.173448000 | -0.346562000 |
| 1 | -7.580925000 | 0.505677000  | 0.151086000  |
| 6 | 6.528860000  | -1.217027000 | -2.903337000 |
| 1 | 7.427498000  | -0.687173000 | -3.192966000 |
| 6 | -1.658304000 | -3.352809000 | 0.535555000  |
| 1 | -0.804387000 | -2.763718000 | 0.234018000  |
| 6 | 2.643870000  | 3.103589000  | -2.400179000 |
| 1 | 2.426479000  | 4.030747000  | -2.914298000 |
| 6 | 3.610790000  | 3.071003000  | -1.398159000 |
| 1 | 4.152376000  | 3.972684000  | -1.143089000 |
| 6 | -5.589841000 | -0.311007000 | 0.119175000  |

|   |              |              |              |
|---|--------------|--------------|--------------|
| 1 | -5.321615000 | 0.271600000  | 0.985139000  |
| 6 | -1.496924000 | 0.651205000  | -2.889542000 |
| 1 | -1.402757000 | 1.688749000  | -3.181537000 |
| 6 | -3.801299000 | -4.945894000 | 1.337351000  |
| 1 | -4.631188000 | -5.560294000 | 1.662035000  |
| 6 | 0.671591000  | 3.639224000  | 1.748771000  |
| 6 | -1.067308000 | -1.681427000 | -3.314900000 |
| 1 | -0.639490000 | -2.456177000 | -3.938023000 |
| 6 | 5.694180000  | -0.232322000 | 3.402258000  |
| 1 | 6.198173000  | -0.120772000 | 4.353539000  |
| 6 | -2.499744000 | -5.436958000 | 1.424236000  |
| 1 | -2.320516000 | -6.433099000 | 1.807581000  |
| 6 | -1.428915000 | -4.639190000 | 1.027177000  |
| 1 | -0.416741000 | -5.015429000 | 1.102535000  |
| 6 | 2.186079000  | 3.919474000  | 1.751734000  |
| 1 | 2.776901000  | 3.003425000  | 1.693948000  |
| 1 | 2.479566000  | 4.568356000  | 0.917752000  |
| 1 | 2.468383000  | 4.426619000  | 2.680873000  |
| 6 | 0.288247000  | 2.856008000  | 3.006898000  |
| 1 | 0.515706000  | 3.451835000  | 3.900140000  |
| 1 | -0.777763000 | 2.612483000  | 3.024697000  |
| 1 | 0.839812000  | 1.911684000  | 3.070605000  |
| 6 | -0.079811000 | 4.985377000  | 1.605298000  |
| 1 | -1.080989000 | 4.922583000  | 2.045941000  |
| 1 | 0.451569000  | 5.794773000  | 2.117004000  |
| 6 | -0.180443000 | 5.199043000  | 0.091789000  |
| 1 | -0.933407000 | 5.939508000  | -0.193186000 |
| 1 | 0.782685000  | 5.524455000  | -0.322176000 |

|   |              |             |              |
|---|--------------|-------------|--------------|
| 6 | -0.525428000 | 3.778398000 | -0.418767000 |
| 1 | -0.172425000 | 3.625666000 | -1.443407000 |
| 1 | 1.166906000  | 2.754974000 | -0.032422000 |
| 6 | -2.031269000 | 3.575299000 | -0.426954000 |
| 6 | -2.723931000 | 3.888095000 | -1.608893000 |
| 6 | -2.777917000 | 3.199138000 | 0.696489000  |
| 6 | -4.117136000 | 3.822359000 | -1.671069000 |
| 1 | -2.162957000 | 4.174940000 | -2.496677000 |
| 6 | -4.174714000 | 3.145027000 | 0.642637000  |
| 1 | -2.272665000 | 2.916392000 | 1.612544000  |
| 6 | -4.850745000 | 3.452408000 | -0.539721000 |
| 1 | -4.627295000 | 4.053726000 | -2.602645000 |
| 1 | -4.733456000 | 2.848552000 | 1.527023000  |
| 1 | -5.935296000 | 3.395903000 | -0.581930000 |

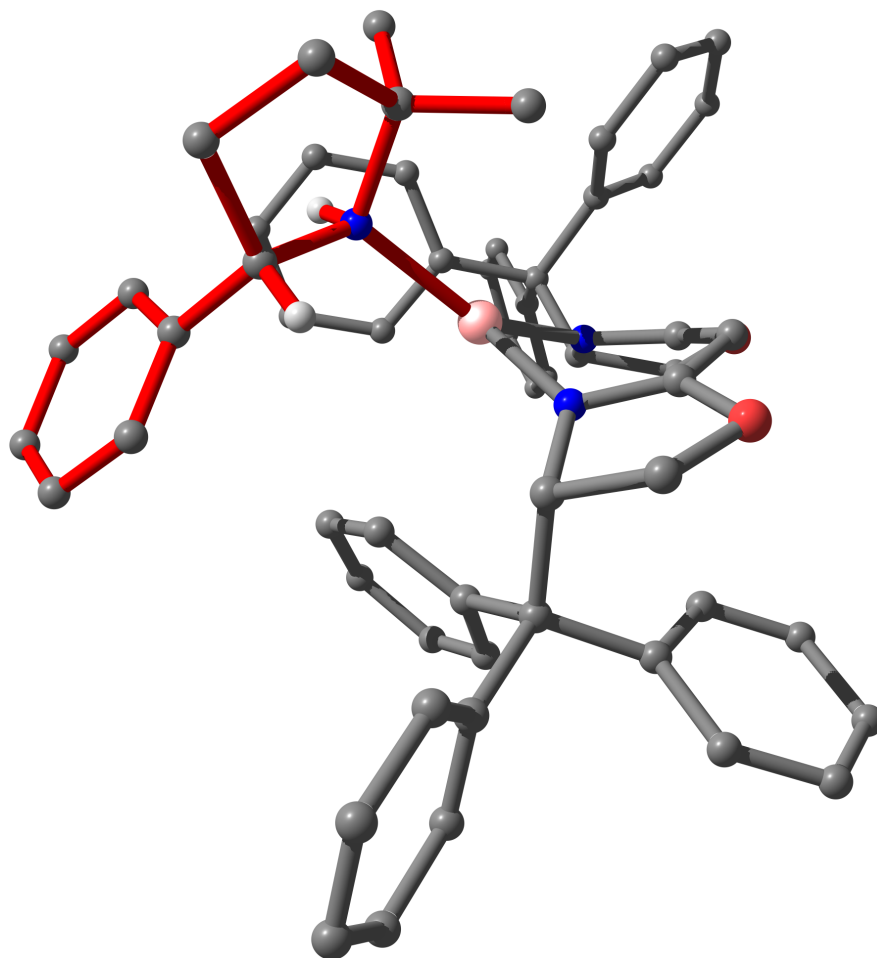

**Figure S21.** DFT optimized structure for product adduct ( $^{\text{AdF}}\text{L}$ )Ni(*S*-pyrrolidine) Color scheme: nickel = pink, nitrogen = blue, carbon = gray, fluorine = green, hydrogen = white. The fragment corresponding to the substrate **9** is labeled in red.

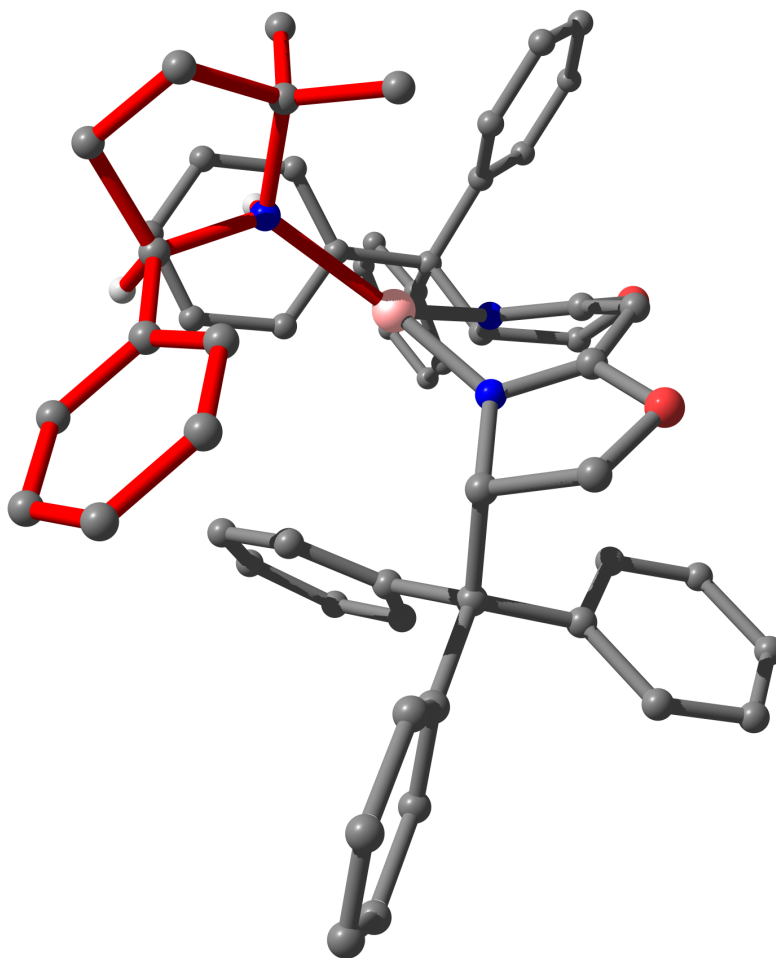

**Figure S22.** DFT optimized structure for product adduct ( $^{AdFL}$ )Ni(*R*-pyrrolidine) Color scheme: nickel = pink, nitrogen = blue, carbon = gray, fluorine = green, hydrogen = white. The fragment corresponding to the substrate **9** is labeled in red.



**Optimized geometry coordinates for (<sup>TrH</sup>BOX)Ni(NR) HAA transition state**

**Pro-S**

|    |              |              |              |
|----|--------------|--------------|--------------|
| 28 | -0.232467000 | 0.084656000  | -0.912954000 |
| 8  | 2.035890000  | -2.824477000 | -2.353971000 |
| 8  | -2.106826000 | -3.487018000 | -0.208373000 |
| 7  | -1.340083000 | -1.360593000 | -0.235565000 |
| 7  | -0.108006000 | 1.665080000  | -1.693612000 |
| 7  | 1.183020000  | -1.144748000 | -1.118373000 |
| 6  | -3.597188000 | -0.457577000 | 0.548704000  |
| 6  | 0.943961000  | -2.314269000 | -1.711293000 |
| 6  | -3.141134000 | 0.996799000  | 0.253666000  |
| 6  | -0.232717000 | -3.052807000 | -1.611391000 |
| 1  | -0.301032000 | -4.045761000 | -2.032185000 |
| 6  | -4.536886000 | -0.333676000 | 1.777737000  |
| 6  | 2.883446000  | -0.317177000 | 1.432886000  |
| 6  | 1.925346000  | 0.709363000  | 1.278575000  |
| 1  | 1.478265000  | 0.928785000  | 0.329681000  |
| 6  | -2.201428000 | 1.639137000  | 1.096454000  |
| 1  | -1.739660000 | 1.121769000  | 1.923337000  |
| 6  | -2.351357000 | -1.366777000 | 0.845466000  |
| 1  | -1.848722000 | -1.032577000 | 1.755550000  |
| 6  | 3.306958000  | -1.271230000 | 0.285528000  |
| 6  | 2.637703000  | -0.908649000 | -1.104754000 |
| 1  | 2.807352000  | 0.139868000  | -1.349478000 |
| 6  | 4.849843000  | -1.109935000 | 0.179100000  |
| 6  | -2.658808000 | -2.895436000 | 0.984251000  |
| 1  | -2.124682000 | -3.320726000 | 1.842207000  |
| 1  | -3.708365000 | -3.186450000 | 1.051725000  |

|   |              |              |              |
|---|--------------|--------------|--------------|
| 6 | 2.861479000  | -2.719122000 | 0.656418000  |
| 6 | -1.206882000 | -2.591825000 | -0.707802000 |
| 6 | -3.784234000 | 1.793992000  | -0.726711000 |
| 1 | -4.581914000 | 1.401884000  | -1.340812000 |
| 6 | -6.314594000 | 0.020911000  | 3.934553000  |
| 1 | -6.995116000 | 0.152959000  | 4.766164000  |
| 6 | -1.876719000 | 2.987356000  | 0.919625000  |
| 1 | -1.166227000 | 3.464618000  | 1.580327000  |
| 6 | -5.171999000 | -0.765988000 | 4.095044000  |
| 1 | -4.972948000 | -1.237254000 | 5.049130000  |
| 6 | -4.414453000 | -1.631033000 | -3.046706000 |
| 1 | -3.971272000 | -1.558607000 | -4.031506000 |
| 6 | -5.707640000 | 0.454974000  | 1.672948000  |
| 1 | -5.961992000 | 0.940176000  | 0.740413000  |
| 6 | -4.284361000 | -0.945525000 | 3.029908000  |
| 1 | -3.418422000 | -1.560420000 | 3.213356000  |
| 6 | -3.787675000 | -1.026884000 | -1.955139000 |
| 1 | -2.864314000 | -0.495138000 | -2.124282000 |
| 6 | -4.348023000 | -1.090523000 | -0.658829000 |
| 6 | 2.055514000  | 1.259162000  | 3.633110000  |
| 1 | 1.736662000  | 1.863017000  | 4.472753000  |
| 6 | 5.744965000  | -1.973954000 | 0.859181000  |
| 1 | 5.387506000  | -2.787123000 | 1.473935000  |
| 6 | 3.413533000  | -0.523739000 | 2.730049000  |
| 1 | 4.122860000  | -1.316640000 | 2.917409000  |
| 6 | -5.544625000 | -1.832994000 | -0.500719000 |
| 1 | -5.994469000 | -1.980998000 | 0.470795000  |
| 6 | -6.167257000 | -2.435770000 | -1.597351000 |

|   |              |              |              |
|---|--------------|--------------|--------------|
| 1 | -7.082110000 | -2.996989000 | -1.457005000 |
| 6 | 3.485593000  | -3.855993000 | 0.087078000  |
| 1 | 4.336294000  | -3.755045000 | -0.570618000 |
| 6 | 3.058777000  | -1.792671000 | -2.306194000 |
| 1 | 2.995617000  | -1.217209000 | -3.237383000 |
| 1 | 4.032011000  | -2.281109000 | -2.263657000 |
| 6 | 7.652306000  | -0.701871000 | 0.088604000  |
| 1 | 8.723165000  | -0.551293000 | 0.045689000  |
| 6 | 7.127072000  | -1.781787000 | 0.793877000  |
| 1 | 7.791527000  | -2.463402000 | 1.309165000  |
| 6 | 6.794658000  | 0.204105000  | -0.530427000 |
| 1 | 7.201374000  | 1.065056000  | -1.045426000 |
| 6 | -6.574484000 | 0.612190000  | 2.760360000  |
| 1 | -7.465153000 | 1.217535000  | 2.649797000  |
| 6 | 1.707514000  | -2.943019000 | 1.451275000  |
| 1 | 1.129761000  | -2.119907000 | 1.849300000  |
| 6 | -2.492504000 | 3.732724000  | -0.082236000 |
| 1 | -2.251625000 | 4.779668000  | -0.207145000 |
| 6 | -3.448921000 | 3.138575000  | -0.899539000 |
| 1 | -3.949263000 | 3.726571000  | -1.658006000 |
| 6 | 5.411172000  | 0.018012000  | -0.469991000 |
| 1 | 4.794018000  | 0.781678000  | -0.916406000 |
| 6 | 3.010036000  | 0.261685000  | 3.811947000  |
| 1 | 3.428483000  | 0.084723000  | 4.794250000  |
| 6 | 3.022938000  | -5.146435000 | 0.356790000  |
| 1 | 3.524442000  | -6.001244000 | -0.078314000 |
| 6 | -0.114517000 | 2.029256000  | -3.116848000 |
| 6 | 1.508609000  | 1.474939000  | 2.371198000  |

|   |              |              |              |
|---|--------------|--------------|--------------|
| 1 | 0.768814000  | 2.250226000  | 2.235422000  |
| 6 | -5.606045000 | -2.331102000 | -2.869027000 |
| 1 | -6.089151000 | -2.802154000 | -3.715234000 |
| 6 | 1.909710000  | -5.336714000 | 1.172581000  |
| 1 | 1.549883000  | -6.337337000 | 1.374072000  |
| 6 | 1.248354000  | -4.236010000 | 1.712160000  |
| 1 | 0.366207000  | -4.382530000 | 2.321959000  |
| 6 | -1.452909000 | 1.596935000  | -3.750884000 |
| 1 | -1.547086000 | 0.506658000  | -3.744672000 |
| 1 | -2.304119000 | 2.026208000  | -3.215883000 |
| 1 | -1.497376000 | 1.932988000  | -4.794661000 |
| 6 | 1.028002000  | 1.321334000  | -3.884827000 |
| 1 | 1.047489000  | 1.644717000  | -4.934188000 |
| 1 | 2.007872000  | 1.535975000  | -3.446775000 |
| 1 | 0.877292000  | 0.237399000  | -3.860825000 |
| 6 | 0.021646000  | 3.571054000  | -3.220902000 |
| 1 | -0.088700000 | 3.884896000  | -4.267173000 |
| 1 | -0.813057000 | 4.015090000  | -2.662290000 |
| 6 | 1.362727000  | 4.093059000  | -2.661262000 |
| 1 | 2.151467000  | 3.922979000  | -3.404895000 |
| 1 | 1.297994000  | 5.180318000  | -2.530281000 |
| 6 | 1.768423000  | 3.419047000  | -1.342745000 |
| 1 | 0.780313000  | 2.502764000  | -1.244929000 |
| 1 | 2.650398000  | 2.779454000  | -1.442191000 |
| 6 | 1.813928000  | 4.204806000  | -0.096504000 |
| 6 | 2.825365000  | 3.967872000  | 0.859399000  |
| 6 | 0.858619000  | 5.200578000  | 0.198536000  |
| 6 | 2.867433000  | 4.671998000  | 2.062349000  |

|   |             |             |              |
|---|-------------|-------------|--------------|
| 1 | 3.584231000 | 3.216096000 | 0.649991000  |
| 6 | 0.896967000 | 5.903497000 | 1.402080000  |
| 1 | 0.075780000 | 5.418910000 | -0.522363000 |
| 6 | 1.897805000 | 5.640507000 | 2.344803000  |
| 1 | 3.656960000 | 4.464264000 | 2.780665000  |
| 1 | 0.141727000 | 6.658478000 | 1.607185000  |
| 1 | 1.924797000 | 6.187364000 | 3.283677000  |

**Pro-R**

|    |              |              |              |
|----|--------------|--------------|--------------|
| 28 | -0.345928000 | 0.368582000  | -0.763745000 |
| 8  | 1.746065000  | -2.371196000 | -2.748403000 |
| 8  | -2.430439000 | -3.158600000 | -0.739889000 |
| 7  | -1.531788000 | -1.118871000 | -0.357198000 |
| 7  | -0.211291000 | 2.073128000  | -1.209382000 |
| 7  | 1.002529000  | -0.871225000 | -1.239953000 |
| 6  | -3.764330000 | -0.262852000 | 0.546211000  |
| 6  | 0.688376000  | -1.902905000 | -2.022599000 |
| 6  | -3.238061000 | 1.197637000  | 0.540475000  |
| 6  | -0.531793000 | -2.575083000 | -2.048291000 |
| 1  | -0.656323000 | -3.469914000 | -2.640918000 |
| 6  | -4.733584000 | -0.326487000 | 1.756337000  |
| 6  | 2.736868000  | -0.619294000 | 1.412432000  |
| 6  | 1.883401000  | 0.507767000  | 1.419973000  |
| 1  | 1.487501000  | 0.927924000  | 0.515942000  |
| 6  | -2.291814000 | 1.623960000  | 1.504581000  |
| 1  | -1.875297000 | 0.939945000  | 2.227917000  |
| 6  | -2.566134000 | -1.267427000 | 0.693142000  |
| 1  | -2.071733000 | -1.129572000 | 1.656951000  |

|   |              |              |              |
|---|--------------|--------------|--------------|
| 6 | 3.092398000  | -1.409496000 | 0.124423000  |
| 6 | 2.475682000  | -0.756167000 | -1.182017000 |
| 1 | 2.735252000  | 0.301302000  | -1.235636000 |
| 6 | 4.647465000  | -1.402626000 | 0.049449000  |
| 6 | -2.948670000 | -2.776231000 | 0.548135000  |
| 1 | -2.435466000 | -3.378606000 | 1.307096000  |
| 1 | -4.011849000 | -3.021616000 | 0.572584000  |
| 6 | 2.510877000  | -2.850108000 | 0.244716000  |
| 6 | -1.474096000 | -2.240049000 | -1.062298000 |
| 6 | -3.819389000 | 2.195097000  | -0.282211000 |
| 1 | -4.618494000 | 1.964278000  | -0.971687000 |
| 6 | -6.564912000 | -0.304603000 | 3.896858000  |
| 1 | -7.266907000 | -0.301903000 | 4.721028000  |
| 6 | -1.896436000 | 2.962181000  | 1.585592000  |
| 1 | -1.174834000 | 3.270277000  | 2.330096000  |
| 6 | -5.456507000 | -1.153532000 | 3.936267000  |
| 1 | -5.304961000 | -1.801341000 | 4.790170000  |
| 6 | -4.536613000 | -0.691656000 | -3.220930000 |
| 1 | -4.066333000 | -0.451174000 | -4.165658000 |
| 6 | -5.870543000 | 0.516691000  | 1.772198000  |
| 1 | -6.077829000 | 1.175712000  | 0.940092000  |
| 6 | -4.542627000 | -1.168984000 | 2.878489000  |
| 1 | -3.705759000 | -1.842871000 | 2.965206000  |
| 6 | -3.911502000 | -0.341306000 | -2.022638000 |
| 1 | -2.960212000 | 0.164322000  | -2.068056000 |
| 6 | -4.507489000 | -0.623889000 | -0.773069000 |
| 6 | 1.976479000  | 0.632926000  | 3.835589000  |
| 1 | 1.679306000  | 1.109344000  | 4.760730000  |

|   |              |              |              |
|---|--------------|--------------|--------------|
| 6 | 5.426087000  | -2.423615000 | 0.652849000  |
| 1 | 4.964410000  | -3.257389000 | 1.162473000  |
| 6 | 3.200788000  | -1.090339000 | 2.665554000  |
| 1 | 3.820041000  | -1.971463000 | 2.733095000  |
| 6 | -5.737430000 | -1.327771000 | -0.781256000 |
| 1 | -6.217446000 | -1.638650000 | 0.135781000  |
| 6 | -6.358226000 | -1.677201000 | -1.983793000 |
| 1 | -7.299910000 | -2.210763000 | -1.969679000 |
| 6 | 3.046765000  | -3.926759000 | -0.503059000 |
| 1 | 3.913639000  | -3.789960000 | -1.133615000 |
| 6 | 2.842528000  | -1.447066000 | -2.519079000 |
| 1 | 2.837689000  | -0.714344000 | -3.335342000 |
| 1 | 3.773772000  | -2.011824000 | -2.561081000 |
| 6 | 7.480580000  | -1.303862000 | 0.042631000  |
| 1 | 8.562346000  | -1.269939000 | 0.032130000  |
| 6 | 6.822257000  | -2.379264000 | 0.633055000  |
| 1 | 7.394234000  | -3.176356000 | 1.090542000  |
| 6 | 6.743450000  | -0.261078000 | -0.513049000 |
| 1 | 7.255636000  | 0.587930000  | -0.947378000 |
| 6 | -6.765667000 | 0.504446000  | 2.847634000  |
| 1 | -7.630747000 | 1.155162000  | 2.829352000  |
| 6 | 1.334524000  | -3.101737000 | 0.996114000  |
| 1 | 0.826691000  | -2.309118000 | 1.528434000  |
| 6 | -2.446814000 | 3.910577000  | 0.727493000  |
| 1 | -2.138728000 | 4.945990000  | 0.793596000  |
| 6 | -3.413514000 | 3.528879000  | -0.198293000 |
| 1 | -3.863117000 | 4.271605000  | -0.844607000 |
| 6 | 5.346254000  | -0.299693000 | -0.498921000 |

|   |              |              |              |
|---|--------------|--------------|--------------|
| 1 | 4.829687000  | 0.549313000  | -0.912332000 |
| 6 | 2.832819000  | -0.464070000 | 3.858093000  |
| 1 | 3.196136000  | -0.845463000 | 4.803606000  |
| 6 | 2.473273000  | -5.199741000 | -0.449398000 |
| 1 | 2.906762000  | -6.011736000 | -1.018754000 |
| 6 | -0.200398000 | 2.722334000  | -2.525967000 |
| 6 | 1.494970000  | 1.109043000  | 2.619535000  |
| 1 | 0.820339000  | 1.952597000  | 2.604950000  |
| 6 | -5.762133000 | -1.354504000 | -3.201837000 |
| 1 | -6.244662000 | -1.628733000 | -4.130987000 |
| 6 | 1.337527000  | -5.425431000 | 0.325858000  |
| 1 | 0.891528000  | -6.410903000 | 0.360414000  |
| 6 | 0.766319000  | -4.376526000 | 1.042628000  |
| 1 | -0.129207000 | -4.546880000 | 1.625860000  |
| 6 | -1.491629000 | 2.366168000  | -3.292227000 |
| 1 | -1.532001000 | 1.293084000  | -3.504049000 |
| 1 | -2.381737000 | 2.646546000  | -2.722197000 |
| 1 | -1.515885000 | 2.900245000  | -4.250687000 |
| 6 | 1.004623000  | 2.226615000  | -3.362267000 |
| 1 | 1.952091000  | 2.373803000  | -2.835343000 |
| 1 | 0.898172000  | 1.156423000  | -3.565835000 |
| 1 | 1.058752000  | 2.759347000  | -4.321129000 |
| 6 | -0.144548000 | 4.264697000  | -2.338567000 |
| 1 | -0.173846000 | 4.750521000  | -3.322688000 |
| 1 | -1.051132000 | 4.576679000  | -1.803061000 |
| 6 | 1.098702000  | 4.729315000  | -1.565044000 |
| 1 | 1.993769000  | 4.573708000  | -2.177100000 |
| 1 | 1.036991000  | 5.815745000  | -1.395848000 |



|   |             |             |              |
|---|-------------|-------------|--------------|
| 6 | 1.231321000 | 4.007990000 | -0.227755000 |
| 1 | 0.575822000 | 2.859797000 | -0.528435000 |
| 1 | 0.519517000 | 4.386284000 | 0.513794000  |
| 6 | 2.566569000 | 3.787178000 | 0.361778000  |
| 6 | 2.761371000 | 3.947383000 | 1.751511000  |
| 6 | 3.688212000 | 3.400042000 | -0.405112000 |
| 6 | 3.999399000 | 3.711381000 | 2.348858000  |
| 1 | 1.920601000 | 4.261198000 | 2.366775000  |
| 6 | 4.930683000 | 3.178469000 | 0.188423000  |
| 1 | 3.588841000 | 3.269117000 | -1.479178000 |
| 6 | 5.094225000 | 3.321212000 | 1.570551000  |
| 1 | 4.111531000 | 3.838287000 | 3.422897000  |
| 1 | 5.777021000 | 2.889330000 | -0.430543000 |
| 1 | 6.061557000 | 3.137723000 | 2.030718000  |

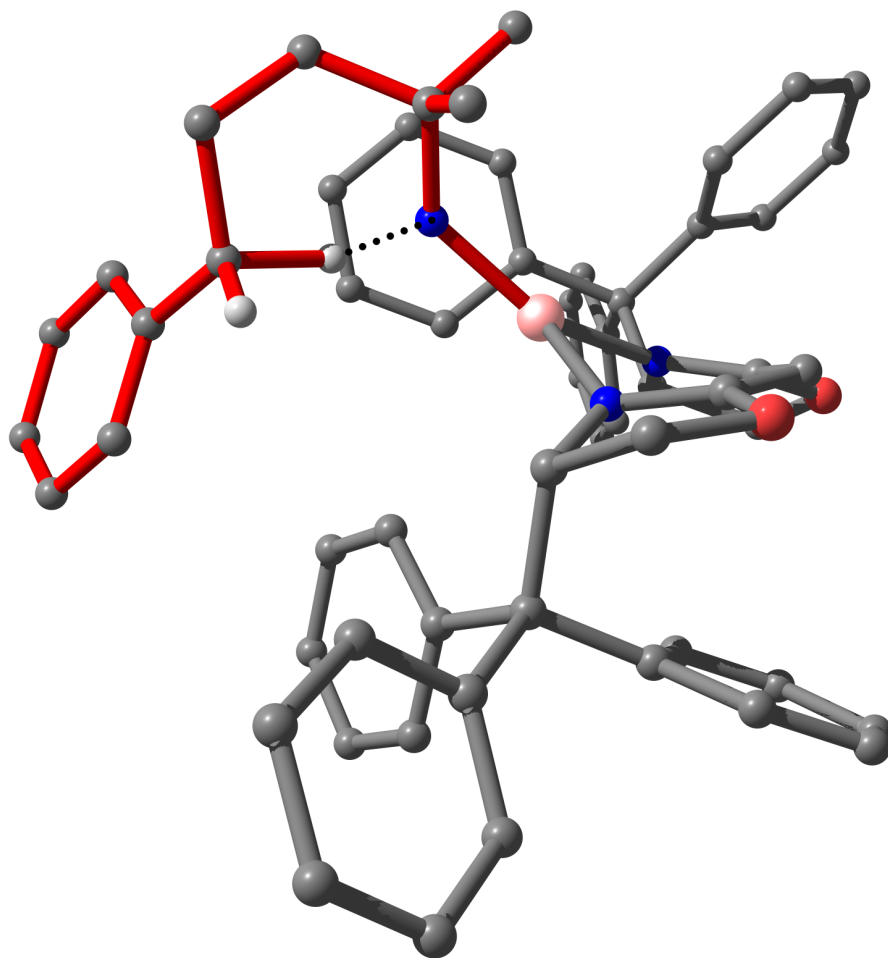

**Figure S23. DFT optimized structure for (<sup>Ad<sup>F</sup>L</sup>)Ni(NR) HAA transition state, *pro*-S hydrogen**

Color scheme: nickel = pink, nitrogen = blue, carbon = gray, fluorine = green, hydrogen = white.

The fragment corresponding to the substrate **9** is labeled in red.

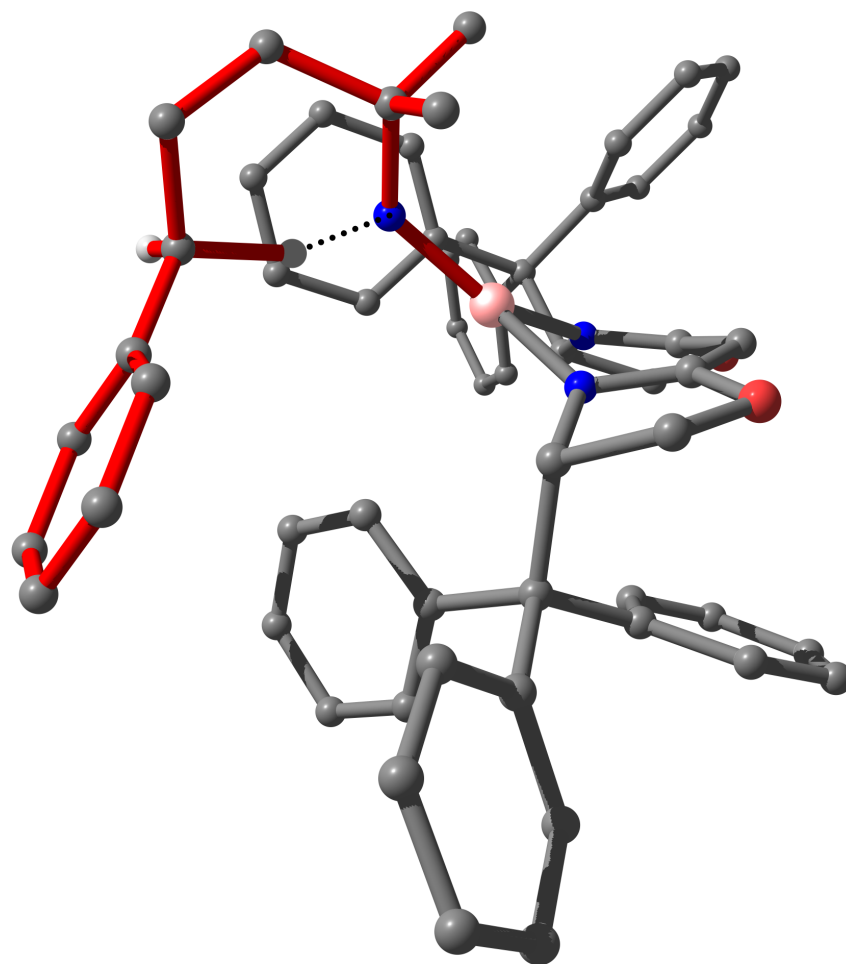

**Figure S24. DFT optimized structure for (<sup>Ad<sup>F</sup>L</sup>)Ni(NR) HAA transition state, *pro*-R hydrogen**

Color scheme: nickel = pink, nitrogen = blue, carbon = gray, fluorine = green, hydrogen = white.

The fragment corresponding to the substrate **9** is labeled in red.

**Optimized geometry coordinates for (<sup>TrH</sup>BOX)Ni(NR) HAA transition state**

*Re*

|    |              |              |              |
|----|--------------|--------------|--------------|
| 28 | -0.261237000 | 0.296144000  | -0.621131000 |
| 8  | 1.804315000  | -2.673238000 | -2.532510000 |
| 8  | -2.397684000 | -3.237809000 | -0.520328000 |
| 7  | -1.518625000 | -1.170557000 | -0.208250000 |
| 7  | -0.094694000 | 2.075015000  | -1.311845000 |
| 7  | 1.110250000  | -0.999362000 | -1.187009000 |
| 6  | -3.847119000 | -0.338546000 | 0.500687000  |
| 6  | 0.769393000  | -2.093859000 | -1.845145000 |
| 6  | -3.389868000 | 1.144004000  | 0.449809000  |
| 6  | -0.469711000 | -2.740914000 | -1.795960000 |
| 1  | -0.598324000 | -3.690946000 | -2.295680000 |
| 6  | -4.895538000 | -0.376004000 | 1.644736000  |
| 6  | 2.358157000  | -0.774848000 | 1.359317000  |
| 6  | 2.208230000  | -1.526059000 | 2.553875000  |
| 1  | 2.751732000  | -2.447099000 | 2.711907000  |
| 6  | -2.584191000 | 1.672694000  | 1.487200000  |
| 1  | -2.225841000 | 1.050333000  | 2.292750000  |
| 6  | -2.615929000 | -1.277681000 | 0.788774000  |
| 1  | -2.185397000 | -1.046949000 | 1.765431000  |
| 6  | 3.256447000  | -1.259025000 | 0.181925000  |
| 6  | 2.576439000  | -0.872705000 | -1.200006000 |
| 1  | 2.795794000  | 0.176554000  | -1.421498000 |
| 6  | 4.628666000  | -0.544522000 | 0.336898000  |
| 6  | -2.936891000 | -2.803876000 | 0.737554000  |
| 1  | -2.402069000 | -3.333965000 | 1.536399000  |
| 1  | -3.989482000 | -3.091359000 | 0.772488000  |

|   |              |              |              |
|---|--------------|--------------|--------------|
| 6 | 3.445754000  | -2.802248000 | 0.239110000  |
| 6 | -1.426910000 | -2.329252000 | -0.856756000 |
| 6 | -3.923805000 | 2.063858000  | -0.488555000 |
| 1 | -4.632077000 | 1.756499000  | -1.243791000 |
| 6 | -6.861102000 | -0.295532000 | 3.661238000  |
| 1 | -7.614301000 | -0.270350000 | 4.438503000  |
| 6 | -2.271179000 | 3.033814000  | 1.538967000  |
| 1 | -1.651003000 | 3.415677000  | 2.339553000  |
| 6 | -5.716093000 | -1.076485000 | 3.834270000  |
| 1 | -5.587396000 | -1.649174000 | 4.743859000  |
| 6 | -4.335937000 | -1.033042000 | -3.275279000 |
| 1 | -3.812255000 | -0.827866000 | -4.200075000 |
| 6 | -6.070740000 | 0.404571000  | 1.526407000  |
| 1 | -6.251570000 | 0.993092000  | 0.636661000  |
| 6 | -4.734533000 | -1.118308000 | 2.839701000  |
| 1 | -3.868243000 | -1.730018000 | 3.032303000  |
| 6 | -3.815958000 | -0.573633000 | -2.063539000 |
| 1 | -2.891450000 | -0.019635000 | -2.077871000 |
| 6 | -4.481560000 | -0.811653000 | -0.840144000 |
| 6 | 0.675862000  | 0.111640000  | 3.455650000  |
| 1 | 0.015636000  | 0.443958000  | 4.246233000  |
| 6 | 5.249920000  | -0.472534000 | 1.607788000  |
| 1 | 4.779420000  | -0.892387000 | 2.483966000  |
| 6 | 1.709784000  | 0.476577000  | 1.298552000  |
| 1 | 1.838981000  | 1.119323000  | 0.443901000  |
| 6 | -5.669194000 | -1.584017000 | -0.884262000 |
| 1 | -6.194182000 | -1.866339000 | 0.017255000  |
| 6 | -6.185994000 | -2.040850000 | -2.100148000 |

|   |              |              |              |
|---|--------------|--------------|--------------|
| 1 | -7.096658000 | -2.625821000 | -2.113709000 |
| 6 | 4.714893000  | -3.415815000 | 0.091666000  |
| 1 | 5.613450000  | -2.835109000 | -0.058408000 |
| 6 | 2.928234000  | -1.763217000 | -2.428329000 |
| 1 | 2.958260000  | -1.158040000 | -3.342862000 |
| 1 | 3.838225000  | -2.363759000 | -2.378414000 |
| 6 | 7.179262000  | 0.642129000  | 0.667957000  |
| 1 | 8.150567000  | 1.102063000  | 0.795533000  |
| 6 | 6.500784000  | 0.127509000  | 1.769814000  |
| 1 | 6.950220000  | 0.181974000  | 2.752939000  |
| 6 | 6.612551000  | 0.548844000  | -0.601103000 |
| 1 | 7.149811000  | 0.931266000  | -1.459433000 |
| 6 | -7.032668000 | 0.422855000  | 2.542928000  |
| 1 | -7.924992000 | 1.024080000  | 2.422871000  |
| 6 | 2.323246000  | -3.651877000 | 0.384432000  |
| 1 | 1.332693000  | -3.238555000 | 0.514649000  |
| 6 | -2.774210000 | 3.906813000  | 0.577319000  |
| 1 | -2.532733000 | 4.960709000  | 0.622685000  |
| 6 | -3.602343000 | 3.422701000  | -0.432633000 |
| 1 | -4.015432000 | 4.105870000  | -1.163382000 |
| 6 | 5.357735000  | -0.042153000 | -0.771462000 |
| 1 | 4.989739000  | -0.118904000 | -1.782466000 |
| 6 | 0.854615000  | 0.896764000  | 2.320197000  |
| 1 | 0.328193000  | 1.834618000  | 2.232144000  |
| 6 | 4.846894000  | -4.807137000 | 0.107720000  |
| 1 | 5.824340000  | -5.257644000 | -0.007624000 |
| 6 | -0.002127000 | 2.367435000  | -2.765224000 |
| 6 | 1.366002000  | -1.091076000 | 3.580034000  |

|   |              |              |              |
|---|--------------|--------------|--------------|
| 1 | 1.251723000  | -1.688245000 | 4.475486000  |
| 6 | -5.523677000 | -1.761312000 | -3.294411000 |
| 1 | -5.924564000 | -2.120169000 | -4.233553000 |
| 6 | 3.724003000  | -5.618381000 | 0.261276000  |
| 1 | 3.830666000  | -6.695363000 | 0.271522000  |
| 6 | 2.463504000  | -5.040976000 | 0.398460000  |
| 1 | 1.591149000  | -5.670378000 | 0.518317000  |
| 6 | -1.215901000 | 1.797810000  | -3.528292000 |
| 1 | -2.159175000 | 2.155398000  | -3.096386000 |
| 1 | -1.211016000 | 0.703896000  | -3.502961000 |
| 1 | -1.188624000 | 2.112738000  | -4.579760000 |
| 6 | 1.279561000  | 1.740912000  | -3.335055000 |
| 1 | 1.407658000  | 2.020511000  | -4.388018000 |
| 1 | 2.167472000  | 2.062896000  | -2.783209000 |
| 1 | 1.222205000  | 0.651035000  | -3.273304000 |
| 6 | 0.010234000  | 3.904002000  | -2.934874000 |
| 1 | 0.159329000  | 4.183151000  | -3.986092000 |
| 1 | -0.975966000 | 4.295568000  | -2.640412000 |
| 6 | 1.090226000  | 4.517751000  | -2.040651000 |
| 1 | 2.083646000  | 4.313949000  | -2.451974000 |
| 1 | 0.984743000  | 5.615503000  | -2.037960000 |
| 6 | 0.971015000  | 4.007053000  | -0.634903000 |
| 1 | 0.064249000  | 4.317902000  | -0.117614000 |
| 1 | -0.939739000 | 2.553930000  | -0.993492000 |
| 6 | 2.106251000  | 3.819815000  | 0.239537000  |
| 6 | 1.945783000  | 3.978236000  | 1.639604000  |
| 6 | 3.401855000  | 3.479780000  | -0.226468000 |
| 6 | 3.003669000  | 3.782861000  | 2.522862000  |

|   |             |             |              |
|---|-------------|-------------|--------------|
| 1 | 0.968151000 | 4.259690000 | 2.025870000  |
| 6 | 4.460481000 | 3.295875000 | 0.658500000  |
| 1 | 3.577436000 | 3.347317000 | -1.289805000 |
| 6 | 4.271013000 | 3.434392000 | 2.039157000  |
| 1 | 2.842853000 | 3.906301000 | 3.591070000  |
| 1 | 5.443812000 | 3.044847000 | 0.270452000  |
| 1 | 5.099703000 | 3.279142000 | 2.724784000  |

***Si***

|    |              |              |              |
|----|--------------|--------------|--------------|
| 28 | 0.022526000  | 0.157233000  | -0.986965000 |
| 8  | 3.122264000  | -1.872521000 | -2.741448000 |
| 8  | -1.060454000 | -3.697947000 | -1.909977000 |
| 7  | -0.822026000 | -1.635260000 | -0.990258000 |
| 7  | -0.377074000 | 1.930334000  | -1.489265000 |
| 7  | 1.836706000  | -0.539122000 | -1.430849000 |
| 6  | -3.082225000 | -1.383847000 | 0.250253000  |
| 6  | 1.886462000  | -1.605641000 | -2.223711000 |
| 6  | -2.716378000 | -0.765466000 | 1.632205000  |
| 6  | 0.871327000  | -2.514979000 | -2.537808000 |
| 1  | 1.094387000  | -3.327337000 | -3.215780000 |
| 6  | -4.337254000 | -2.284188000 | 0.417436000  |
| 6  | 3.138143000  | 0.472693000  | 1.346353000  |
| 6  | 3.003167000  | -0.017322000 | 2.671788000  |
| 1  | 3.249243000  | -1.039434000 | 2.922011000  |
| 6  | -1.418874000 | -0.264739000 | 1.881390000  |
| 1  | -0.662129000 | -0.264867000 | 1.115249000  |
| 6  | -1.891848000 | -2.311193000 | -0.209800000 |
| 1  | -1.420710000 | -2.744533000 | 0.688651000  |



|   |              |              |              |
|---|--------------|--------------|--------------|
| 6 | 3.784576000  | -0.406324000 | 0.240095000  |
| 6 | 3.228000000  | -0.069799000 | -1.201536000 |
| 1 | 3.260606000  | 0.998507000  | -1.394375000 |
| 6 | 5.297152000  | -0.089557000 | 0.375202000  |
| 6 | -2.245979000 | -3.532597000 | -1.116310000 |
| 1 | -2.383443000 | -4.452177000 | -0.541776000 |
| 1 | -3.104837000 | -3.416149000 | -1.787063000 |
| 6 | 3.499160000  | -1.918856000 | 0.465683000  |
| 6 | -0.322140000 | -2.550552000 | -1.814167000 |
| 6 | -3.675724000 | -0.633404000 | 2.670561000  |
| 1 | -4.709814000 | -0.912182000 | 2.522880000  |
| 6 | -6.570705000 | -3.977445000 | 0.793427000  |
| 1 | -7.425944000 | -4.624883000 | 0.937234000  |
| 6 | -1.069350000 | 0.230977000  | 3.138887000  |
| 1 | -0.067140000 | 0.585249000  | 3.316217000  |
| 6 | -5.388992000 | -4.217423000 | 1.491949000  |
| 1 | -5.327485000 | -5.051217000 | 2.179236000  |
| 6 | -4.328843000 | 1.969338000  | -1.235377000 |
| 1 | -4.753627000 | 2.898717000  | -0.882415000 |
| 6 | -5.551784000 | -2.058317000 | -0.276468000 |
| 1 | -5.673296000 | -1.235798000 | -0.965238000 |
| 6 | -4.284697000 | -3.382296000 | 1.309165000  |
| 1 | -3.383079000 | -3.588093000 | 1.872152000  |
| 6 | -3.905962000 | 1.000829000  | -0.321318000 |
| 1 | -4.041873000 | 1.220867000  | 0.726883000  |
| 6 | -3.366526000 | -0.236336000 | -0.759380000 |
| 6 | 2.341648000  | 2.161729000  | 3.481696000  |
| 1 | 2.030304000  | 2.805742000  | 4.293918000  |

|   |              |              |              |
|---|--------------|--------------|--------------|
| 6 | 6.025130000  | -0.604884000 | 1.474841000  |
| 1 | 5.551034000  | -1.261433000 | 2.191779000  |
| 6 | 2.925440000  | 1.860392000  | 1.151683000  |
| 1 | 3.122500000  | 2.343513000  | 0.209942000  |
| 6 | -3.295409000 | -0.450630000 | -2.157662000 |
| 1 | -2.934870000 | -1.373851000 | -2.573033000 |
| 6 | -3.727078000 | 0.520869000  | -3.062425000 |
| 1 | -3.669451000 | 0.330692000  | -4.126516000 |
| 6 | 4.448482000  | -2.911997000 | 0.127121000  |
| 1 | 5.424200000  | -2.646192000 | -0.255609000 |
| 6 | 3.977854000  | -0.778229000 | -2.374574000 |
| 1 | 4.061789000  | -0.105767000 | -3.238185000 |
| 1 | 4.963955000  | -1.194813000 | -2.162095000 |
| 6 | 8.021523000  | 0.564803000  | 0.772802000  |
| 1 | 9.065576000  | 0.809113000  | 0.920078000  |
| 6 | 7.373506000  | -0.291465000 | 1.660448000  |
| 1 | 7.914646000  | -0.709416000 | 2.499540000  |
| 6 | 7.318178000  | 1.120790000  | -0.294197000 |
| 1 | 7.817237000  | 1.803283000  | -0.970106000 |
| 6 | -6.651682000 | -2.899883000 | -0.087512000 |
| 1 | -7.571853000 | -2.713341000 | -0.626209000 |
| 6 | 2.213639000  | -2.353810000 | 0.872164000  |
| 1 | 1.429203000  | -1.638142000 | 1.078736000  |
| 6 | -2.012898000 | 0.290630000  | 4.161072000  |
| 1 | -1.737976000 | 0.686009000  | 5.130334000  |
| 6 | -3.320813000 | -0.120724000 | 3.920140000  |
| 1 | -4.064418000 | -0.039594000 | 4.702484000  |
| 6 | 5.968220000  | 0.812795000  | -0.486248000 |

|   |              |              |              |
|---|--------------|--------------|--------------|
| 1 | 5.464454000  | 1.301297000  | -1.305641000 |
| 6 | 2.518201000  | 2.685361000  | 2.204450000  |
| 1 | 2.365259000  | 3.743386000  | 2.034420000  |
| 6 | 4.144365000  | -4.270346000 | 0.255056000  |
| 1 | 4.886512000  | -5.015488000 | -0.000611000 |
| 6 | 0.010502000  | 2.585079000  | -2.759899000 |
| 6 | 2.597192000  | 0.814307000  | 3.717572000  |
| 1 | 2.491997000  | 0.413226000  | 4.717392000  |
| 6 | -4.236156000 | 1.732141000  | -2.603207000 |
| 1 | -4.569360000 | 2.482928000  | -3.307986000 |
| 6 | 2.882326000  | -4.669781000 | 0.693345000  |
| 1 | 2.648261000  | -5.722442000 | 0.784575000  |
| 6 | 1.915632000  | -3.712245000 | 0.994568000  |
| 1 | 0.927692000  | -4.021592000 | 1.310838000  |
| 6 | -0.621751000 | 1.878129000  | -3.979882000 |
| 1 | -1.704229000 | 2.036141000  | -4.010758000 |
| 1 | -0.424247000 | 0.801592000  | -3.951293000 |
| 1 | -0.207924000 | 2.281240000  | -4.913456000 |
| 6 | 1.539034000  | 2.542396000  | -2.912777000 |
| 1 | 1.853676000  | 3.143322000  | -3.774651000 |
| 1 | 2.043347000  | 2.929394000  | -2.022022000 |
| 1 | 1.870067000  | 1.513256000  | -3.074168000 |
| 6 | -0.493109000 | 4.044670000  | -2.714090000 |
| 1 | -0.182726000 | 4.592827000  | -3.614294000 |
| 1 | -1.592791000 | 4.030713000  | -2.716178000 |
| 6 | 0.005365000  | 4.758478000  | -1.440505000 |
| 1 | 1.075204000  | 4.974775000  | -1.542529000 |
| 1 | -0.498606000 | 5.731020000  | -1.351959000 |

|   |              |             |              |
|---|--------------|-------------|--------------|
| 6 | -0.217244000 | 3.926339000 | -0.208401000 |
| 1 | 0.657586000  | 3.505007000 | 0.267573000  |
| 1 | -1.380593000 | 2.082001000 | -1.360718000 |
| 6 | -1.398329000 | 3.998560000 | 0.604779000  |
| 6 | -1.402932000 | 3.409499000 | 1.897499000  |
| 6 | -2.588086000 | 4.655993000 | 0.189829000  |
| 6 | -2.520570000 | 3.476105000 | 2.721795000  |
| 1 | -0.498394000 | 2.918584000 | 2.247473000  |
| 6 | -3.704602000 | 4.718201000 | 1.019729000  |
| 1 | -2.631314000 | 5.126166000 | -0.788532000 |
| 6 | -3.684812000 | 4.125786000 | 2.288791000  |
| 1 | -2.486505000 | 3.036476000 | 3.714921000  |
| 1 | -4.599628000 | 5.230698000 | 0.674819000  |
| 1 | -4.557761000 | 4.176885000 | 2.933773000  |

**$\kappa^1$ -azide-N-internal linkage isomer**

|    |              |              |              |
|----|--------------|--------------|--------------|
| 28 | 0.144786000  | -0.270844000 | 0.560581000  |
| 8  | 1.948391000  | 2.268447000  | -2.077722000 |
| 8  | -1.381915000 | -0.843035000 | -3.180955000 |
| 7  | -0.617038000 | -1.065501000 | -1.058566000 |
| 7  | 1.495212000  | 0.763317000  | -0.448474000 |
| 6  | -2.553612000 | -2.576909000 | -0.378473000 |
| 6  | 1.115472000  | 1.282398000  | -1.604660000 |
| 6  | -2.095621000 | -2.531864000 | 1.105561000  |
| 6  | 0.044842000  | 0.880876000  | -2.414714000 |
| 1  | -0.111636000 | 1.373903000  | -3.364337000 |
| 6  | -3.173140000 | -3.987645000 | -0.557705000 |
| 6  | 3.640896000  | -1.092201000 | 0.454331000  |

|   |              |              |              |
|---|--------------|--------------|--------------|
| 6 | 3.899962000  | -2.384604000 | -0.071771000 |
| 1 | 4.341898000  | -2.521919000 | -1.047639000 |
| 6 | -0.928188000 | -3.218946000 | 1.520983000  |
| 1 | -0.302274000 | -3.748442000 | 0.819981000  |
| 6 | -1.324843000 | -2.335393000 | -1.328328000 |
| 1 | -0.598535000 | -3.143397000 | -1.214228000 |
| 6 | 3.976431000  | 0.204965000  | -0.335335000 |
| 6 | 2.834351000  | 1.275540000  | -0.118203000 |
| 1 | 2.819316000  | 1.597159000  | 0.927193000  |
| 6 | 5.340564000  | 0.676843000  | 0.234420000  |
| 6 | -1.662788000 | -2.212806000 | -2.853932000 |
| 1 | -0.991046000 | -2.842533000 | -3.450147000 |
| 1 | -2.690063000 | -2.430450000 | -3.153737000 |
| 6 | 4.091555000  | -0.058831000 | -1.867396000 |
| 6 | -0.626011000 | -0.326336000 | -2.159750000 |
| 6 | -2.912037000 | -1.970017000 | 2.119630000  |
| 1 | -3.863440000 | -1.512146000 | 1.889800000  |
| 6 | -4.382152000 | -6.525426000 | -0.744347000 |
| 1 | -4.844056000 | -7.501521000 | -0.821711000 |
| 6 | -0.564436000 | -3.276296000 | 2.868779000  |
| 1 | 0.333380000  | -3.803225000 | 3.164109000  |
| 6 | -3.266155000 | -6.225169000 | -1.528679000 |
| 1 | -2.868776000 | -6.969670000 | -2.206662000 |
| 6 | -4.255132000 | 0.888101000  | -0.622342000 |
| 1 | -4.058329000 | 1.898924000  | -0.292385000 |
| 6 | -4.301894000 | -4.348036000 | 0.217031000  |
| 1 | -4.746611000 | -3.640496000 | 0.903527000  |
| 6 | -2.659381000 | -4.968754000 | -1.439654000 |

|   |              |              |              |
|---|--------------|--------------|--------------|
| 1 | -1.798332000 | -4.795985000 | -2.064046000 |
| 6 | -3.361803000 | -0.135421000 | -0.301823000 |
| 1 | -2.486028000 | 0.108767000  | 0.276904000  |
| 6 | -3.598496000 | -1.469808000 | -0.700864000 |
| 6 | 3.162306000  | -3.432800000 | 1.977035000  |
| 1 | 2.971496000  | -4.326268000 | 2.557315000  |
| 6 | 6.456803000  | -0.188646000 | 0.138352000  |
| 1 | 6.364974000  | -1.152819000 | -0.343058000 |
| 6 | 3.219925000  | -1.018445000 | 1.803177000  |
| 1 | 3.106289000  | -0.068617000 | 2.303191000  |
| 6 | -4.753643000 | -1.722310000 | -1.481355000 |
| 1 | -4.964837000 | -2.706379000 | -1.875494000 |
| 6 | -5.644514000 | -0.693167000 | -1.800799000 |
| 1 | -6.523090000 | -0.905527000 | -2.396275000 |
| 6 | 5.110697000  | 0.533485000  | -2.653961000 |
| 1 | 5.859094000  | 1.178612000  | -2.215480000 |
| 6 | 2.908494000  | 2.534661000  | -1.034840000 |
| 1 | 2.580628000  | 3.428716000  | -0.487601000 |
| 1 | 3.867559000  | 2.750775000  | -1.509665000 |
| 6 | 7.873953000  | 1.422096000  | 1.252603000  |
| 1 | 8.842697000  | 1.707714000  | 1.641739000  |
| 6 | 7.705662000  | 0.181453000  | 0.641952000  |
| 1 | 8.545576000  | -0.495686000 | 0.554959000  |
| 6 | 6.794065000  | 2.296661000  | 1.357684000  |
| 1 | 6.928351000  | 3.261838000  | 1.829127000  |
| 6 | -4.884079000 | -5.615536000 | 0.101824000  |
| 1 | -5.750422000 | -5.861721000 | 0.702671000  |
| 6 | 3.108754000  | -0.821960000 | -2.544006000 |

|   |              |              |              |
|---|--------------|--------------|--------------|
| 1 | 2.291527000  | -1.276340000 | -1.999640000 |
| 6 | -1.366999000 | -2.680713000 | 3.838553000  |
| 1 | -1.086007000 | -2.733990000 | 4.882348000  |
| 6 | -2.540075000 | -2.030978000 | 3.464498000  |
| 1 | -3.175383000 | -1.588564000 | 4.220920000  |
| 6 | 5.540143000  | 1.934926000  | 0.856220000  |
| 1 | 4.749193000  | 2.659275000  | 0.963149000  |
| 6 | 2.976049000  | -2.176866000 | 2.547904000  |
| 1 | 2.660918000  | -2.103518000 | 3.579295000  |
| 6 | 5.163468000  | 0.331490000  | -4.035922000 |
| 1 | 5.951747000  | 0.790652000  | -4.618511000 |
| 6 | -0.794880000 | 1.958283000  | 2.614670000  |
| 6 | 3.634782000  | -3.536229000 | 0.672367000  |
| 1 | 3.822313000  | -4.512111000 | 0.243252000  |
| 6 | -5.398121000 | 0.609321000  | -1.368432000 |
| 1 | -6.088244000 | 1.404395000  | -1.619591000 |
| 6 | 4.195786000  | -0.445635000 | -4.670139000 |
| 1 | 4.237653000  | -0.595919000 | -5.741142000 |
| 6 | 3.166717000  | -1.017547000 | -3.925281000 |
| 1 | 2.407389000  | -1.610612000 | -4.418591000 |
| 6 | -0.002484000 | 2.815806000  | 3.612988000  |
| 1 | 0.057267000  | 2.353339000  | 4.604691000  |
| 1 | 1.015397000  | 2.998481000  | 3.250820000  |
| 1 | -0.497839000 | 3.783970000  | 3.737785000  |
| 6 | -2.164498000 | 1.575207000  | 3.195419000  |
| 1 | -2.721730000 | 2.472647000  | 3.482600000  |
| 1 | -2.766039000 | 1.016500000  | 2.473070000  |
| 1 | -2.047649000 | 0.960677000  | 4.095919000  |

|   |              |              |              |
|---|--------------|--------------|--------------|
| 6 | -0.887491000 | 2.660870000  | 1.244603000  |
| 1 | 0.111326000  | 3.032187000  | 0.982981000  |
| 1 | -1.128046000 | 1.917245000  | 0.478369000  |
| 6 | -1.905787000 | 3.806590000  | 1.153452000  |
| 1 | -2.917014000 | 3.431666000  | 1.352262000  |
| 1 | -1.706871000 | 4.578530000  | 1.909682000  |
| 6 | -1.891810000 | 4.459133000  | -0.246764000 |
| 1 | -0.904779000 | 4.907317000  | -0.423962000 |
| 1 | -2.015062000 | 3.675307000  | -1.004718000 |
| 6 | -2.971510000 | 5.507452000  | -0.415169000 |
| 6 | -4.198993000 | 5.186341000  | -1.014587000 |
| 6 | -2.783848000 | 6.818151000  | 0.050955000  |
| 6 | -5.212237000 | 6.141559000  | -1.138318000 |
| 1 | -4.359284000 | 4.180760000  | -1.398494000 |
| 6 | -3.792609000 | 7.777708000  | -0.070121000 |
| 1 | -1.833693000 | 7.092414000  | 0.506543000  |
| 6 | -5.013133000 | 7.441396000  | -0.664212000 |
| 1 | -6.153552000 | 5.871491000  | -1.610938000 |
| 1 | -3.623513000 | 8.788571000  | 0.293308000  |
| 1 | -5.797960000 | 8.187031000  | -0.763095000 |
| 7 | -0.021740000 | 0.645226000  | 2.348429000  |
| 7 | 0.403303000  | 0.116640000  | 3.395233000  |
| 7 | 0.802077000  | -0.379219000 | 4.344537000  |

**$\kappa^1$ -azide-N-terminal linkage isomer**

|    |              |              |             |
|----|--------------|--------------|-------------|
| 28 | -1.044444000 | -0.278563000 | 0.370922000 |
| 8  | -3.223280000 | 1.737464000  | 3.216667000 |
| 8  | -3.089101000 | -2.932249000 | 2.710867000 |



|   |              |              |              |
|---|--------------|--------------|--------------|
| 7 | -1.899740000 | -1.826294000 | 1.134433000  |
| 7 | -1.990411000 | 1.067726000  | 1.437448000  |
| 6 | -0.762495000 | -3.743926000 | -0.103084000 |
| 6 | -2.677872000 | 0.699657000  | 2.510905000  |
| 6 | -0.380133000 | -2.773891000 | -1.254146000 |
| 6 | -2.947460000 | -0.591207000 | 2.981246000  |
| 1 | -3.499670000 | -0.703887000 | 3.903986000  |
| 6 | -0.997977000 | -5.108327000 | -0.805632000 |
| 6 | -2.367431000 | 2.535245000  | -1.311124000 |
| 6 | -3.105694000 | 2.026353000  | -2.410239000 |
| 1 | -4.169612000 | 1.852324000  | -2.346899000 |
| 6 | -1.374395000 | -2.232550000 | -2.105258000 |
| 1 | -2.421961000 | -2.443295000 | -1.959117000 |
| 6 | -2.039271000 | -3.218668000 | 0.643640000  |
| 1 | -2.909952000 | -3.231329000 | -0.022940000 |
| 6 | -3.050045000 | 2.922993000  | 0.028815000  |
| 6 | -2.140081000 | 2.531366000  | 1.258323000  |
| 1 | -1.142261000 | 2.958194000  | 1.151456000  |
| 6 | -3.255053000 | 4.454785000  | -0.099355000 |
| 6 | -2.450304000 | -3.970836000 | 1.941182000  |
| 1 | -3.189065000 | -4.760188000 | 1.793474000  |
| 1 | -1.628063000 | -4.366407000 | 2.547396000  |
| 6 | -4.411457000 | 2.195185000  | 0.238910000  |
| 6 | -2.611868000 | -1.731955000 | 2.253137000  |
| 6 | 0.973057000  | -2.536665000 | -1.605358000 |
| 1 | 1.784981000  | -2.992077000 | -1.056519000 |
| 6 | -1.283126000 | -7.557101000 | -2.172608000 |
| 1 | -1.397765000 | -8.499482000 | -2.693077000 |

|   |              |              |              |
|---|--------------|--------------|--------------|
| 6 | -1.032232000 | -1.429662000 | -3.195907000 |
| 1 | -1.808933000 | -1.026108000 | -3.831677000 |
| 6 | -2.385483000 | -6.978580000 | -1.540173000 |
| 1 | -3.348056000 | -7.472434000 | -1.578544000 |
| 6 | 1.972654000  | -2.752643000 | 2.452352000  |
| 1 | 2.431984000  | -1.845167000 | 2.822886000  |
| 6 | 0.081281000  | -5.733951000 | -1.476629000 |
| 1 | 1.066435000  | -5.288499000 | -1.470334000 |
| 6 | -2.252724000 | -5.761675000 | -0.864551000 |
| 1 | -3.143042000 | -5.357067000 | -0.415442000 |
| 6 | 0.973740000  | -2.680505000 | 1.479091000  |
| 1 | 0.686374000  | -1.704812000 | 1.119615000  |
| 6 | 0.373587000  | -3.850009000 | 0.955592000  |
| 6 | -1.146795000 | 2.079732000  | -3.828100000 |
| 1 | -0.676710000 | 1.892393000  | -4.784761000 |
| 6 | -4.172065000 | 4.946048000  | -1.059184000 |
| 1 | -4.751362000 | 4.261462000  | -1.665027000 |
| 6 | -1.021464000 | 2.902196000  | -1.556978000 |
| 1 | -0.430138000 | 3.412558000  | -0.812428000 |
| 6 | 0.777483000  | -5.092333000 | 1.505029000  |
| 1 | 0.307475000  | -6.019759000 | 1.209846000  |
| 6 | 1.775933000  | -5.156857000 | 2.481003000  |
| 1 | 2.074866000  | -6.115720000 | 2.884538000  |
| 6 | -5.522655000 | 2.850413000  | 0.823280000  |
| 1 | -5.473805000 | 3.891189000  | 1.111805000  |
| 6 | -2.700990000 | 2.952167000  | 2.654697000  |
| 1 | -1.891175000 | 3.307722000  | 3.304765000  |
| 1 | -3.505320000 | 3.690394000  | 2.664026000  |

|   |              |              |              |
|---|--------------|--------------|--------------|
| 6 | -3.630705000 | 7.231806000  | -0.486894000 |
| 1 | -3.778437000 | 8.294367000  | -0.630410000 |
| 6 | -4.363467000 | 6.317468000  | -1.240830000 |
| 1 | -5.079457000 | 6.670995000  | -1.971502000 |
| 6 | -2.697414000 | 6.776105000  | 0.442718000  |
| 1 | -2.116558000 | 7.488273000  | 1.014736000  |
| 6 | -0.087696000 | -6.952964000 | -2.142970000 |
| 1 | 0.758116000  | -7.412061000 | -2.638986000 |
| 6 | -4.534419000 | 0.806759000  | -0.017432000 |
| 1 | -3.699890000 | 0.241553000  | -0.412734000 |
| 6 | 0.305119000  | -1.169493000 | -3.485297000 |
| 1 | 0.566175000  | -0.550587000 | -4.333807000 |
| 6 | 1.306426000  | -1.732738000 | -2.698497000 |
| 1 | 2.345743000  | -1.556216000 | -2.942707000 |
| 6 | -2.499662000 | 5.404993000  | 0.630763000  |
| 1 | -1.741920000 | 5.112928000  | 1.340226000  |
| 6 | -0.415165000 | 2.651439000  | -2.791004000 |
| 1 | 0.621699000  | 2.919840000  | -2.947809000 |
| 6 | -6.713091000 | 2.163054000  | 1.075626000  |
| 1 | -7.553510000 | 2.683603000  | 1.516424000  |
| 6 | 3.810355000  | 0.887781000  | -0.086564000 |
| 6 | -2.494416000 | 1.782916000  | -3.642572000 |
| 1 | -3.074357000 | 1.379512000  | -4.462656000 |
| 6 | 2.378066000  | -3.989860000 | 2.948419000  |
| 1 | 3.150375000  | -4.043688000 | 3.704741000  |
| 6 | -6.816763000 | 0.804840000  | 0.779540000  |
| 1 | -7.738300000 | 0.274751000  | 0.982379000  |
| 6 | -5.725962000 | 0.126029000  | 0.240290000  |

|   |              |              |              |
|---|--------------|--------------|--------------|
| 1 | -5.798513000 | -0.933350000 | 0.030258000  |
| 6 | 4.036686000  | -0.622262000 | -0.258867000 |
| 1 | 3.159404000  | -1.186867000 | 0.074558000  |
| 1 | 4.231152000  | -0.872393000 | -1.307525000 |
| 1 | 4.888521000  | -0.958933000 | 0.341207000  |
| 6 | 3.536816000  | 1.237043000  | 1.384521000  |
| 1 | 4.384695000  | 0.949354000  | 2.014760000  |
| 1 | 3.365912000  | 2.312787000  | 1.505768000  |
| 1 | 2.655210000  | 0.703609000  | 1.759469000  |
| 6 | 4.960459000  | 1.723868000  | -0.685564000 |
| 1 | 5.006567000  | 1.502713000  | -1.760645000 |
| 1 | 4.680482000  | 2.783065000  | -0.604240000 |
| 6 | 6.346551000  | 1.512630000  | -0.061772000 |
| 1 | 6.325649000  | 1.737050000  | 1.012617000  |
| 1 | 6.655530000  | 0.463408000  | -0.154379000 |
| 6 | 7.418513000  | 2.401655000  | -0.729535000 |
| 1 | 7.445154000  | 2.180984000  | -1.805247000 |
| 1 | 7.118869000  | 3.454151000  | -0.634466000 |
| 6 | 8.798705000  | 2.209407000  | -0.135953000 |
| 6 | 9.224434000  | 2.975111000  | 0.960354000  |
| 6 | 9.673414000  | 1.237893000  | -0.646286000 |
| 6 | 10.483120000 | 2.774485000  | 1.534137000  |
| 1 | 8.565277000  | 3.741205000  | 1.365130000  |
| 6 | 10.933421000 | 1.032392000  | -0.077090000 |
| 1 | 9.366718000  | 0.640161000  | -1.502965000 |
| 6 | 11.342561000 | 1.800302000  | 1.017292000  |
| 1 | 10.794091000 | 3.382342000  | 2.380378000  |
| 1 | 11.596785000 | 0.277149000  | -0.491681000 |

|   |              |             |              |
|---|--------------|-------------|--------------|
| 1 | 12.323456000 | 1.645107000 | 1.459257000  |
| 7 | 2.615486000  | 1.301429000 | -0.931207000 |
| 7 | 1.527634000  | 0.837084000 | -0.588172000 |
| 7 | 0.442202000  | 0.488690000 | -0.403317000 |

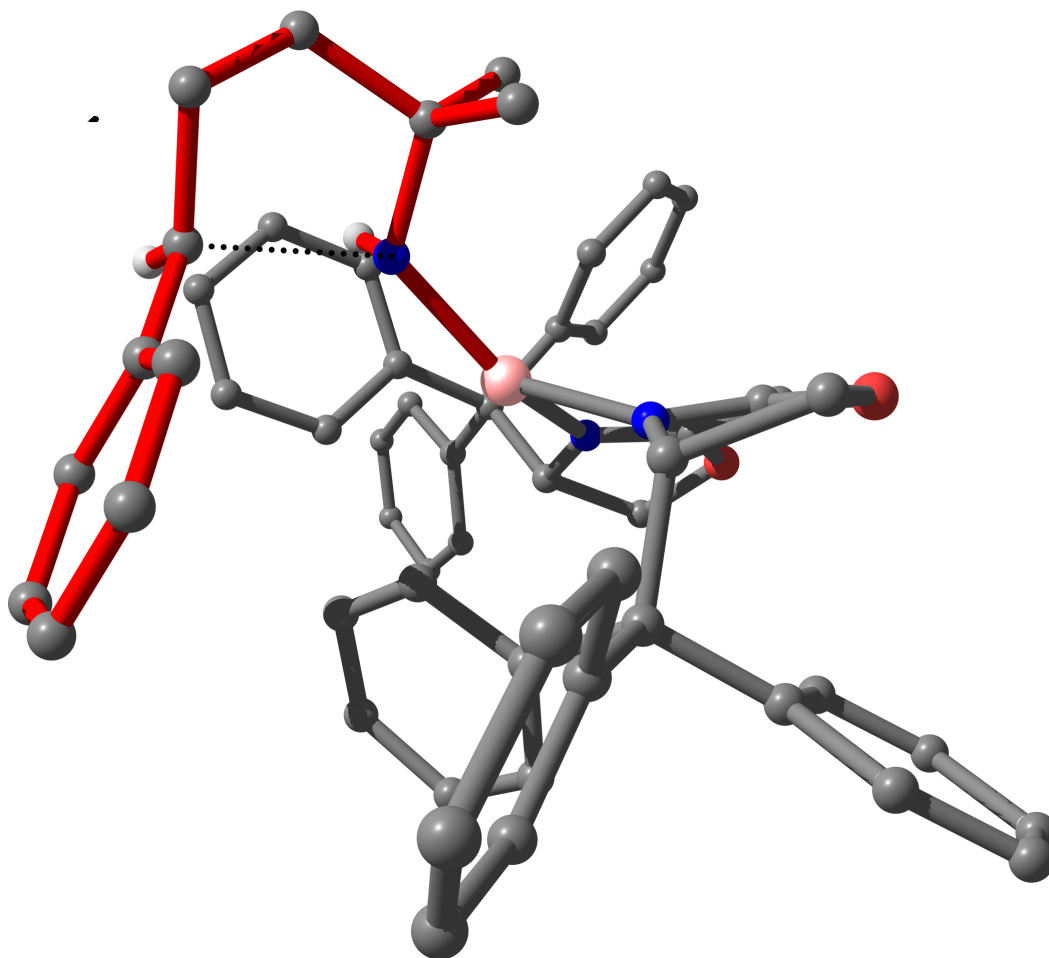

**Figure S25.** DFT optimized structure for (<sup>AdFL</sup>)Ni(NHR) RR transition state, *Re* Color scheme: nickel = pink, nitrogen = blue, carbon = gray, fluorine = green, hydrogen = white. The fragment corresponding to the substrate **9** is labeled in red.

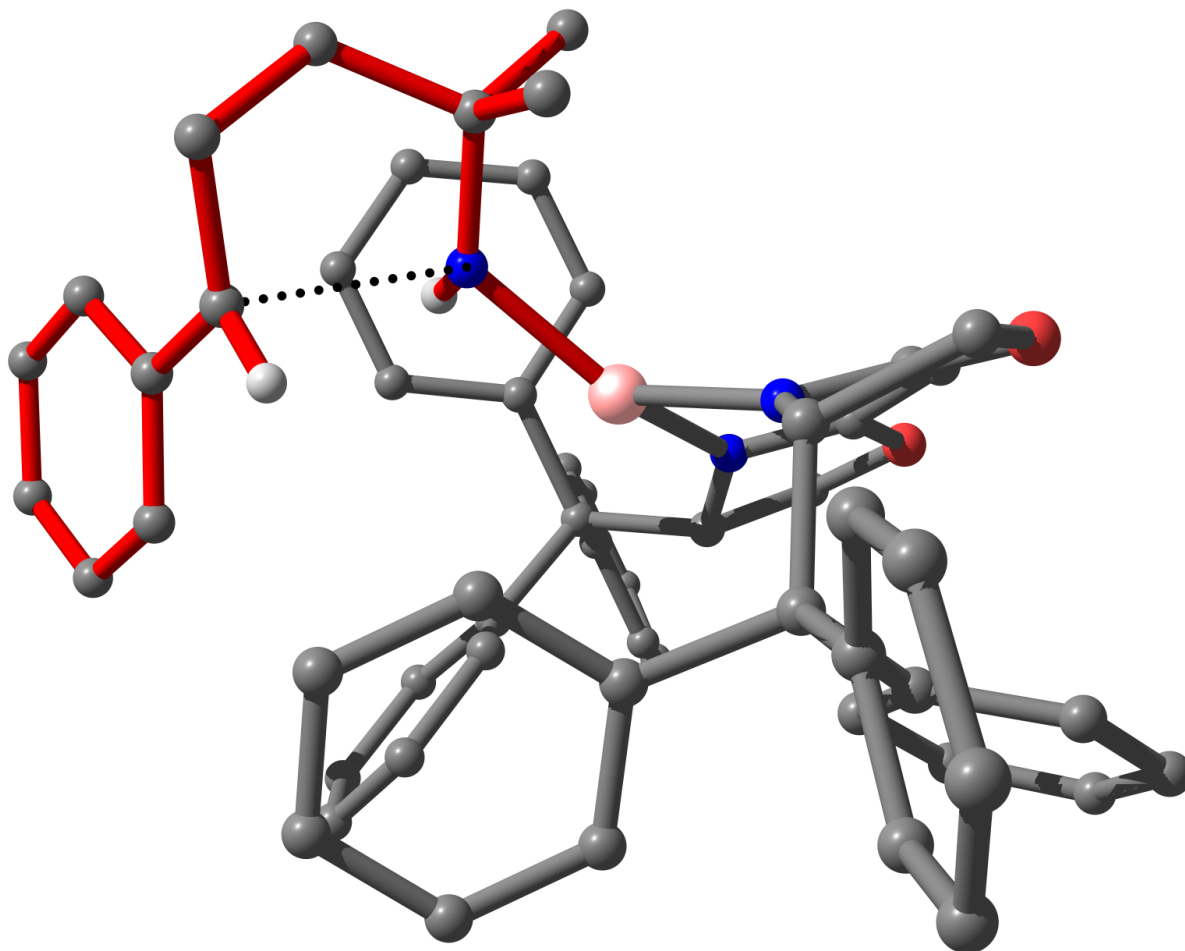

**Figure S26.** DFT optimized structure for (<sup>AdFL</sup>Ni(NHR) RR transition state, *Si* Color scheme: nickel = pink, nitrogen = blue, carbon = gray, fluorine = green, hydrogen = white. The fragment corresponding to the substrate **9** is labeled in red.

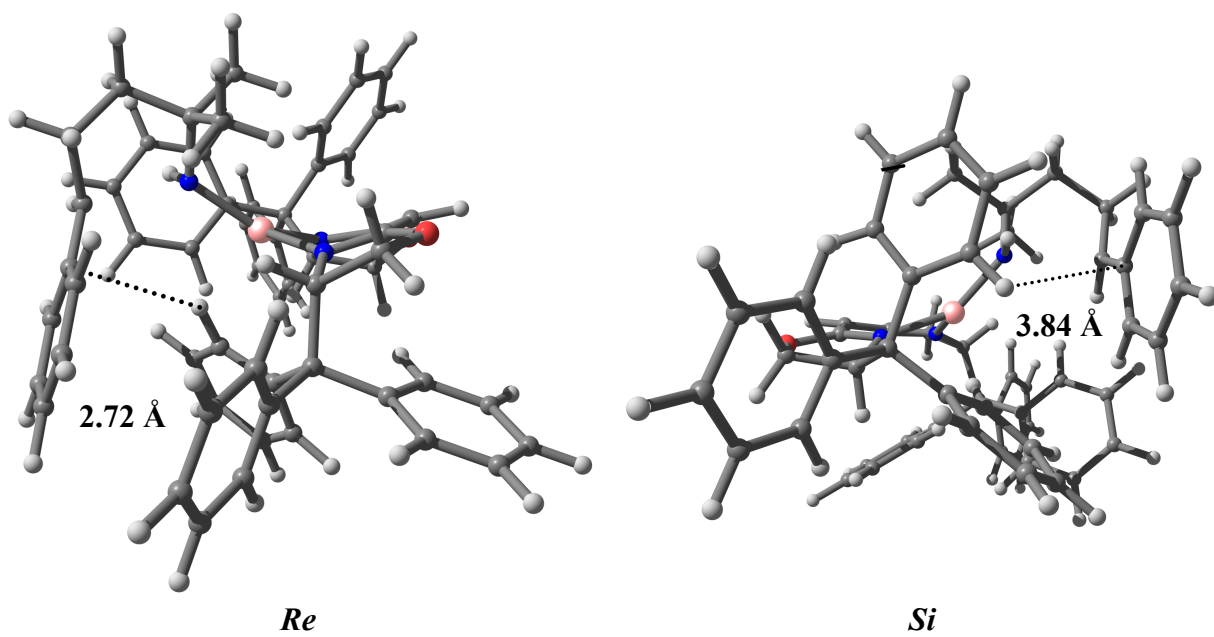

**Figure S27. Transition state structures comparison for radical recombination step (RR)**



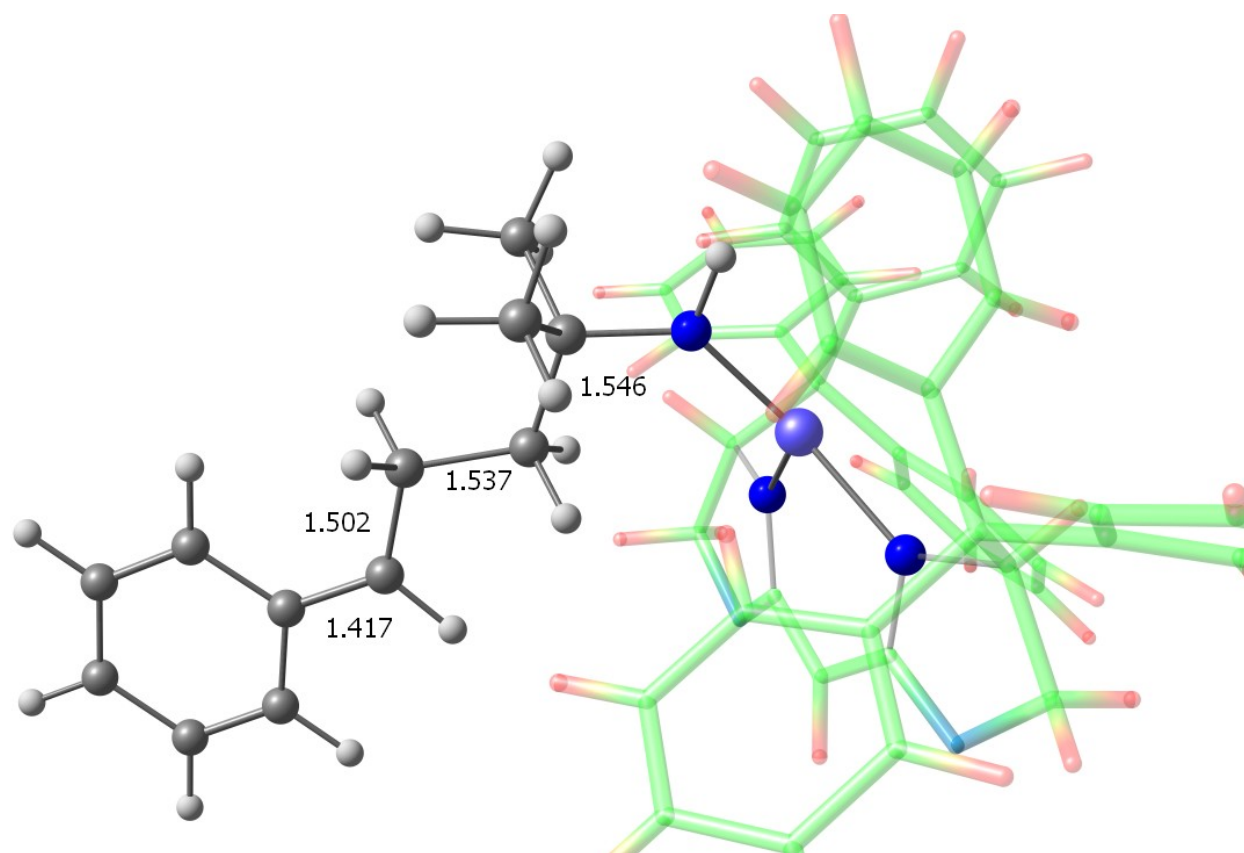

**Figure S28. Bond metrics of amide intermediate C and discussion regarding rotational barrier of carbonyl radical**

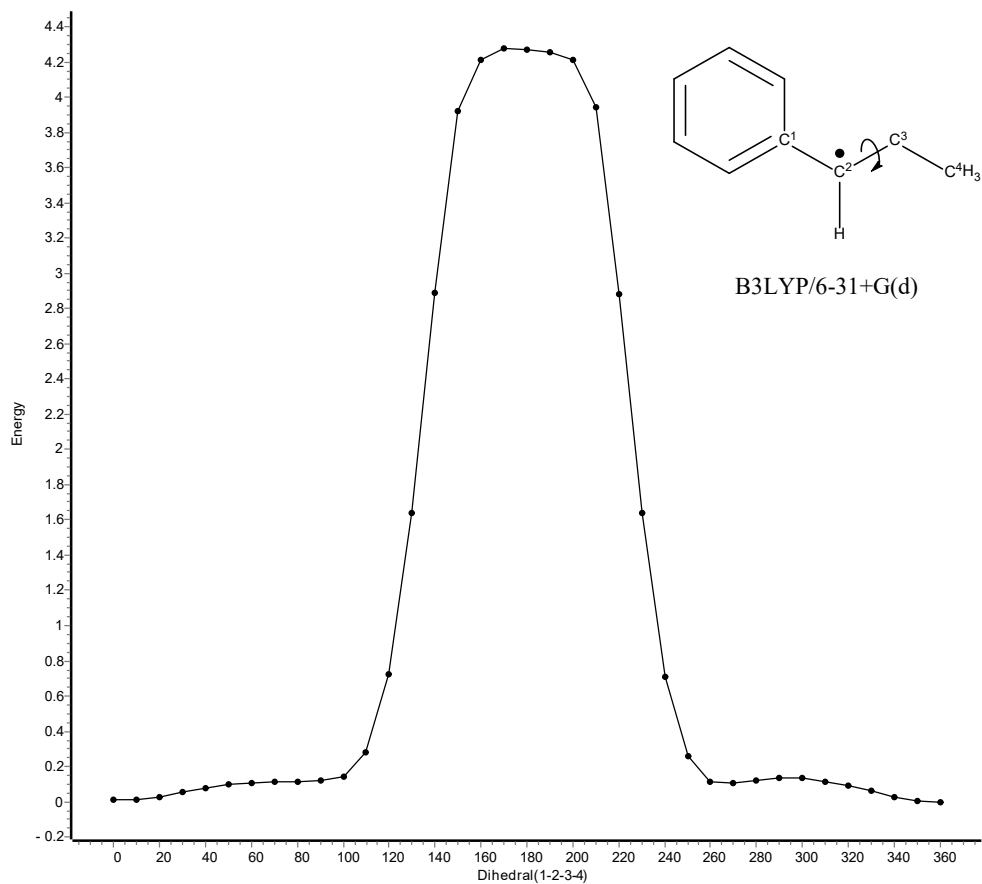

Additionally, we carried out a rotational relaxed surface scan around  $C^2-C^3$  bond of radical  $\text{Ph}-\dot{C}^2\text{H}-C^3\text{H}_2-C^4\text{H}_3$  at the same theory level [B3LYP/6-31+G(d)]. Although the barrier is predicted as 4.3 kcal/mol, additional chiral steric strain imposed by the bulky ligand pocket likely will further energetically differentiate *Re* and *Si* faces of the radical and raise the rotational barrier to a level similar to that of the radical recombination step.

## References

1. Dong, Y.; Clarke, R. M.; Porter, G. J.; Betley, T. A., Efficient C-H amination catalysis using nickel-dipyrrin complexes. *J. Am. Chem. Soc.* **2020**, *142*, 10996.
2. Stoll, S.; Schweiger, A., EasySpin, a comprehensive software package for spectral simulation and analysis in EPR. *J. Magn. Reson.* **2006**, *178*, 42.
3. Denmark, S. E.; Nakajima, N.; Nicaise, O. J. C.; Faucher, A.-M.; Edwards, J. P., Preparation of Chiral Bisoxazolines: Observations on the Effect of Substituents. *J. Org. Chem.* **1995**, *60*, 4884.
4. Benkeser, R. A.; Siklosi, M. P.; Mozdzen, E. C., Reversible Grignard and organolithium reactions. *J. Am. Chem. Soc.* **1978**, *100*, 2134.
5. Chen, T.-G.; Zhang, H.; Mykhailiuk, P. K.; Merchant, R. R.; Smith, C. A.; Qin, T.; Baran, P. S., Quaternary Centers by Nickel-Catalyzed Cross-Coupling of Tertiary Carboxylic Acids and (Hetero)Aryl Zinc Reagents. *Angew. Chem. Int. Ed.* **2019**, *58*, 2454.
6. Zhang, L.; Si, X.; Yang, Y.; Witzel, S.; Sekine, K.; Rudolph, M.; Rominger, F.; Hashmi, A. S. K., Reductive C–C Coupling by Desulfurizing Gold-Catalyzed Photoreactions. *ACS Catalysis* **2019**, *9*, 6118.
7. Bogert, M. T.; Davidson, D.; Apfelbaum, P. M., The Synthesis of Condensed Polynuclear Hydrocarbons by the Cyclodehydration of Aromatic Alcohols. II.1 The Synthesis of Ionenenes2. *J. Am. Chem. Soc.* **1934**, *56*, 959.
8. Baek, Y.; Hennessy, E. T.; Betley, T. A., Direct Manipulation of Metal Imido Geometry: Key Principles to Enhance C–H Amination Efficacy. *J. Am. Chem. Soc.* **2019**, *141*, 16944.
9. Nani, R. R.; Reisman, S. E.,  $\alpha$ -Diazo- $\beta$ -ketonitriles: Uniquely Reactive Substrates for Arene and Alkene Cyclopropanation. *J. Am. Chem. Soc.* **2013**, *135*, 7304.

10. Kadam, A. J.; Desai, U.; Mane, R., Synthesis of ( $\pm$ )-7,8- and 5,6-dimethyl-2-(2-hydroxyisopropyl) tetralins. *Indian. J. Chem. B.* **2000**, *39*, 752.
11. Mane, R. B.; Kadam, A. J.; Salunkhe, R. S., Synthesis of 1,1,5,6-Tetramethyl- and 7-Isopropyl-1,1-dimethyl-1,2,3,4-tetrahydronaphthalene. *Collect. Czech. Chem. Commun.* **1999**, *64*, 527.
12. Ye, A.-H.; Zhang, Y.; Xie, Y.-Y.; Luo, H.-Y.; Dong, J.-W.; Liu, X.-D.; Song, X.-F.; Ding, T.; Chen, Z.-M., TMSCl-Catalyzed Electrophilic Thiocyno Oxyfunctionalization of Alkenes Using N-Thiocyno-dibenzenesulfonimide. *Org. Lett.* **2019**, *21*, 5106.
13. Braddock, D. C.; Cansell, G.; Hermitage, S. A., Ortho-substituted iodobenzenes as novel organocatalysts for bromination of alkenes. *Chemical Communications* **2006**, 2483.
14. Davies, H. M. L.; Walji, A. M., Direct Synthesis of (+)-Erogorgiaene through a Kinetic Enantiodifferentiating Step. *Angew. Chem. Int. Ed.* **2005**, *44*, 1733.
15. Allen, D. A.; Tomaso, A. E.; Priest, O. P.; Hindson, D. F.; Hurlburt, J. L., Mosher Amides: Determining the Absolute Stereochemistry of Optically-Active Amines. *J. Chem. Educ.* **2008**, *85*, 698.
16. Dale, J. A.; Mosher, H. S., Nuclear magnetic resonance enantiomer reagents. Configurational correlations via nuclear magnetic resonance chemical shifts of diastereomeric mandelate, O-methylmandelate, and .alpha.-methoxy-.alpha.-trifluoromethylphenylacetate (MTPA) esters. *J. Am. Chem. Soc.* **1973**, *95*, 512.
17. Dale, J. A.; Dull, D. L.; Mosher, H. S., .alpha.-Methoxy-.alpha.-trifluoromethylphenylacetic acid, a versatile reagent for the determination of enantiomeric composition of alcohols and amines. *J. Org. Chem.* **1969**, *34*, 2543.

18. Duvall, J. R.; Wu, F.; Snider, B. B., Structure Reassignment and Synthesis of Jenamidines A1/A2, Synthesis of (+)-NP25302, and Formal Synthesis of SB-311009 Analogues. *J. Org. Chem.* **2006**, *71*, 8579.
19. Hua, D. H. Synthesis and application of chiral substituted polyvinylpyrrolidinones. WO 2017172763, Oct 5, 2017.
20. Bruker *APEX2*, Bruker AXS Inc.: Madison, Wisconsin, USA, 2012.
21. Sheldrick, G., A short history of SHELX. *Acta Crystallographica Section A* **2008**, *64*, 112.
22. Neese, F., The ORCA program system. *WIREs Computational Molecular Science* **2012**, *2*, 73.
23. Becke, A. D., Density-functional thermochemistry. III. The role of exact exchange. *J. Chem. Phys.* **1993**, *98*, 5648.
24. Lee, C.; Yang, W.; Parr, R. G., Development of the Colle-Salvetti correlation-energy formula into a functional of the electron density. *Physical Review B* **1988**, *37*, 785.
25. Vosko, S. H.; Wilk, L.; Nusair, M., Accurate spin-dependent electron liquid correlation energies for local spin density calculations: a critical analysis. *Can. J. Phys.* **1980**, *58*, 1200.
26. Stephens, P. J.; Devlin, F. J.; Chabalowski, C. F.; Frisch, M. J., Ab Initio Calculation of Vibrational Absorption and Circular Dichroism Spectra Using Density Functional Force Fields. *J. Phys. Chem.* **1994**, *98*, 11623.
27. Schäfer, A.; Horn, H.; Ahlrichs, R., Fully optimized contracted Gaussian basis sets for atoms Li to Kr. *J. Chem. Phys.* **1992**, *97*, 2571.
28. Schäfer, A.; Huber, C.; Ahlrichs, R., Fully optimized contracted Gaussian basis sets of triple zeta valence quality for atoms Li to Kr. *J. Chem. Phys.* **1994**, *100*, 5829.

29. Frisch, M. J.; Trucks, G. W.; Schlegel, H. B.; Scuseria, G. E.; Robb, M. A.; Cheeseman, J. R.; Scalmani, G.; Barone, V.; Petersson, G. A.; Nakatsuji, H.; Li, X.; Caricato, M.; Marenich, A. V.; Bloino, J.; Janesko, B. G.; Gomperts, R.; Mennucci, B.; Hratchian, H. P.; Ortiz, J. V.; Izmaylov, A. F.; Sonnenberg, J. L.; Williams; Ding, F.; Lipparini, F.; Egidi, F.; Goings, J.; Peng, B.; Petrone, A.; Henderson, T.; Ranasinghe, D.; Zakrzewski, V. G.; Gao, J.; Rega, N.; Zheng, G.; Liang, W.; Hada, M.; Ehara, M.; Toyota, K.; Fukuda, R.; Hasegawa, J.; Ishida, M.; Nakajima, T.; Honda, Y.; Kitao, O.; Nakai, H.; Vreven, T.; Throssell, K.; Montgomery Jr., J. A.; Peralta, J. E.; Ogliaro, F.; Bearpark, M. J.; Heyd, J. J.; Brothers, E. N.; Kudin, K. N.; Staroverov, V. N.; Keith, T. A.; Kobayashi, R.; Normand, J.; Raghavachari, K.; Rendell, A. P.; Burant, J. C.; Iyengar, S. S.; Tomasi, J.; Cossi, M.; Millam, J. M.; Klene, M.; Adamo, C.; Cammi, R.; Ochterski, J. W.; Martin, R. L.; Morokuma, K.; Farkas, O.; Foresman, J. B.; Fox, D. J. *Gaussian 16 Rev. C.01*, Wallingford, CT, 2016.
30. Svensson, M.; Humbel, S.; Froese, R. D. J.; Matsubara, T.; Sieber, S.; Morokuma, K., ONIOM: A Multilayered Integrated MO + MM Method for Geometry Optimizations and Single Point Energy Predictions. A Test for Diels–Alder Reactions and Pt(P(t-Bu)<sub>3</sub>)<sub>2</sub> + H<sub>2</sub> Oxidative Addition. *The Journal of Physical Chemistry* **1996**, *100*, 19357.
31. Rappe, A. K.; Casewit, C. J.; Colwell, K. S.; Goddard, W. A.; Skiff, W. M., UFF, a full periodic table force field for molecular mechanics and molecular dynamics simulations. *J. Am. Chem. Soc.* **1992**, *114*, 10024.
